# Supplementary material for: 1-Alkyl-3-alkylindolin-2-imine hydrochlorides as useful building blocks in the copper-catalyzed synthesis of polycyclic indoline scaffolds
Source: Royal Society of Chemistry journal article supplement (doi:10.1039/c9ra00995g), 2019-01-01

## Supporting Information

### 1-Alkyl-3-alkylindolin-2-imine hydrochlorides as the useful building blocks in copper-catalyzed synthesis of polycyclic indoline scaffolds

Can Liu,<sup>a,b</sup> Haijun Yang,<sup>b</sup> Changjin Zhu,<sup>a</sup> and Hua Fu<sup>a,b\*</sup>

<sup>a</sup>School of Chemistry and Chemical Engineering, Beijing Institute of Technology, Beijing 100081, China

<sup>b</sup>Key Laboratory of Bioorganic Phosphorus Chemistry and Chemical Biology (Ministry of Education), Department of Chemistry, Tsinghua University, Beijing 100084, China

\*To whom correspondence should be addressed. E-mail: fuhua@mail.tsinghua.edu.cn

#### Table of Contents

|                                                                                   |     |
|-----------------------------------------------------------------------------------|-----|
| 1. General Procedures                                                             | S2  |
| 2. Synthesis and Characterization Data of Substrates <b>1a-ah</b>                 | S3  |
| 3. Synthesis and Characterization Data of <b>3a-an</b> , <b>4</b> and <b>5a-f</b> | S15 |
| 3.1. General Procedures for Preparation of <b>3a-an</b>                           | S15 |
| 3.2. Characterization of <b>3a-an</b>                                             | S15 |
| 3.3. Procedure for preparation of compound <b>4</b> .                             | S30 |
| 3.4 Procedure for the reductions using DIBAL-H                                    | S30 |
| 4. References                                                                     | S34 |
| 5. NMR Spectra of <b>1a-ah</b> , <b>3a-an</b> , <b>4</b> , and <b>5a-f</b>        | S35 |

## 1. General Procedures

All reactions were carried out under a nitrogen atmosphere in dry solvents. The reactions were monitored by thin layer chromatography (TLC), and the products were isolated by silica gel column chromatography.  $^1\text{H}$ ,  $^{13}\text{C}$  and  $^{19}\text{F}$  NMR spectra were recorded on JEOL ECS-400, JNM-ECA 600 or AV-HD-800X spectrometers. Chemical shifts were reported in ppm down field from internal  $\text{Me}_4\text{Si}$  and external  $\text{CFCl}_3$ , respectively.  $^1\text{H}$  NMR chemical shifts were referenced to the hydrogen signal of tetramethylsilane (TMS) ( $\delta = 0.00$  ppm). In  $^{13}\text{C}$  measurements the signal of  $\text{CDCl}_3$  ( $\delta = 77.06$ ) was used as a reference. The following abbreviations (or combinations thereof) were used to explain the multiplicities: s = singlet, d = doublet, t = triplet, q = quartet, quint = quintet, sext = sextet, h = heptet, m = multiplet, dd = doublet of doublets, dt = doublet of triplets, td = triplet of doublets, br = broad.

## 2. Synthesis and Characterization Data of Substrates 1a-ah

Substrates **1a-ah** were prepared according to the previous procedures.<sup>1</sup>

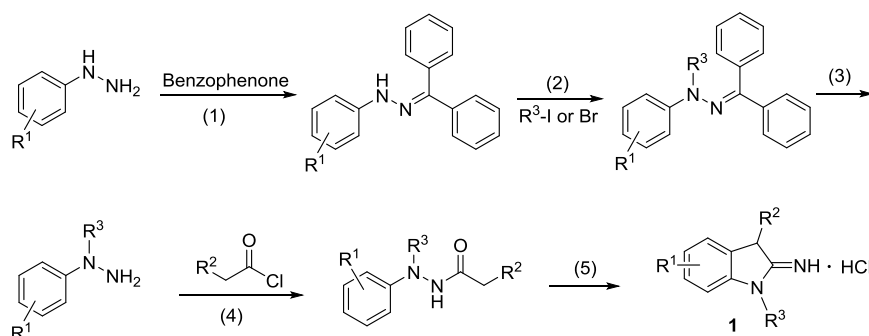

**Scheme S1.** Synthetic routes of compounds **1a-ah**. Reagents and conditions: (1) *p*-Toluenesulfonic acid (5%), EtOH, 8 h; (2) NaH,  $CH_2Cl_2$ , 0 °C to rt, 3 h; (3) EtOH/HCl, rt or 50 °C, 8 h; (4)  $NEt_3$ ,  $CH_2Cl_2$ , 0 °C to rt, 3 h; (5)  $POCl_3$  (3.0 eq), 1,4-Dioxane, reflux, 3 h.

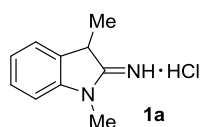

**1a:** Pale yellow solid, mp = 279 – 281 °C;  $^1H$  NMR (800 MHz, Methanol- $d_4$ )  $\delta$  7.49 (d,  $J$  = 7.4 Hz, 1H), 7.44 (td,  $J$  = 7.8, 1.2 Hz, 1H), 7.31 (d,  $J$  = 8.0 Hz, 1H), 7.28 (td,  $J$  = 7.5, 0.8 Hz, 1H), 3.56 (s, 3H), 1.62 (s, 3H);  $^{13}C$  NMR (201 MHz, MeOD)  $\delta$  175.1, 144.3, 132.7, 129.9, 126.4, 124.9, 111.7, 42.7 (m), 30.1, 17.0. Positive ion ESI-MS: Calcd for  $C_{10}H_{13}ClN_2$  [ $M-Cl$ ] $^+$ : 161.1. Found: 161.2.

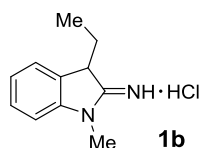

**1b:** Pale yellow solid, mp = 273 – 276 °C;  $^1H$  NMR (400 MHz, DMSO- $d_6$ )  $\delta$  10.72 (s, 1H), 10.45 (s, 1H), 7.43 (d,  $J$  = 7.4 Hz, 1H), 7.37 (t,  $J$  = 7.7 Hz, 1H), 7.28 (d,  $J$  = 7.8 Hz, 1H), 7.19 (t,  $J$  = 7.5 Hz, 1H), 4.28 (t,  $J$  = 4.9 Hz, 1H), 3.55 (s, 3H), 2.16 (dt,  $J$  = 12.7, 6.4 Hz, 2H), 0.56 (t,  $J$  = 7.4 Hz, 3H);  $^{13}C$  NMR (101 MHz, DMSO- $d_6$ )  $\delta$  172.2, 144.3, 129.9, 128.9, 125.1, 124.5, 111.1, 47.3, 30.4, 24.2, 9.1. Positive ion ESI-MS: Calcd for  $C_{11}H_{15}ClN_2$  [ $M-Cl$ ] $^+$ : 175.1. Found: 175.1.

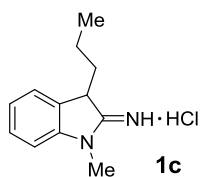

**1c:** Pale yellow solid, mp = 248 – 250 °C;  $^1\text{H}$  NMR (800 MHz,  $\text{CD}_3\text{OD}$ )  $\delta$  7.50 (d,  $J$  = 7.4 Hz, 1H), 7.46 (td,  $J$  = 7.9, 1.1 Hz, 1H), 7.32 (d,  $J$  = 8.0 Hz, 1H), 7.31 – 7.28 (m, 1H), 3.56 (s, 3H), 2.24 – 2.16 (m, 1H), 2.08 – 1.99 (m, 1H), 1.32 – 1.23 (m, 1H), 1.16 – 1.08 (m, 1H), 0.92 (t,  $J$  = 7.4 Hz, 3H);  $^{13}\text{C}$  NMR (201 MHz,  $\text{CD}_3\text{OD}$ )  $\delta$  174.3, 144.9, 131.1, 129.9, 126.4, 125.3, 111.8, 47.6 (m), 34.4, 30.0, 19.0, 14.2. Positive ion ESI-MS: Calcd for  $\text{C}_{12}\text{H}_{17}\text{ClN}_2$   $[\text{M} - \text{Cl}]^+$ : 189.1. Found: 189.2.

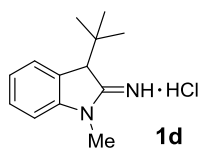

**1d:** Pale yellow solid, mp = 294 – 297 °C;  $^1\text{H}$  NMR (600 MHz,  $\text{DMSO}-d_6$ )  $\delta$  10.46 (s, 1H), 10.03 (s, 1H), 7.48 (d,  $J$  = 7.5 Hz, 1H), 7.43 (t,  $J$  = 7.7 Hz, 1H), 7.32 (d,  $J$  = 7.9 Hz, 1H), 7.21 (t,  $J$  = 7.5 Hz, 1H), 3.99 (s, 1H), 3.55 (s, 3H), 0.98 (s, 9H);  $^{13}\text{C}$  NMR (151 MHz,  $\text{DMSO}-d_6$ )  $\delta$  171.1, 143.9, 128.7, 128.6, 125.9, 123.8, 110.4, 55.9, 35.6, 29.8, 26.9. Positive ion ESI-MS: Calcd for  $\text{C}_{13}\text{H}_{19}\text{ClN}_2$   $[\text{M} - \text{Cl}]^+$ : 203.2. Found: 203.2.

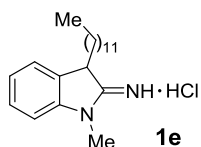

**1e:** Pale yellow solid, mp = 132 – 134 °C;  $^1\text{H}$  NMR (800 MHz,  $\text{CD}_3\text{OD}$ )  $\delta$  7.49 (d,  $J$  = 7.4 Hz, 1H), 7.46 (td,  $J$  = 7.8, 1.1 Hz, 1H), 7.32 (d,  $J$  = 8.0 Hz, 1H), 7.30 (td,  $J$  = 7.5, 0.7 Hz, 1H), 3.56 (s, 3H), 2.28 – 2.17 (m, 1H), 2.10 – 2.02 (m, 1H), 1.34 – 1.18 (m, 19H), 1.11 – 1.00 (m, 1H), 0.89 (t,  $J$  = 7.2 Hz, 3H);  $^{13}\text{C}$  NMR (201 MHz,  $\text{CD}_3\text{OD}$ )  $\delta$  174.3, 144.9, 131.0, 130.0, 126.4, 125.3, 111.8, 47.7 (m), 33.1, 32.2, 30.7, 30.7, 30.7, 30.6, 30.5, 30.4, 30.3, 30.0, 25.5, 23.7. Positive ion ESI-MS: Calcd for  $\text{C}_{21}\text{H}_{35}\text{ClN}_2$   $[\text{M} - \text{Cl}]^+$ : 315.3. Found: 315.2.

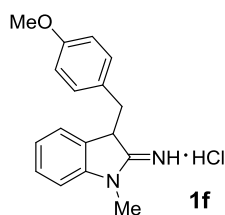

**1f**: Pale yellow solid, mp = 238 – 241 °C; <sup>1</sup>H NMR (600 MHz, CD<sub>3</sub>OD) δ 7.40 (t, *J* = 8.1 Hz, 1H), 7.20 (t, *J* = 7.6 Hz, 1H), 7.17 (d, *J* = 8.1 Hz, 1H), 7.12 (d, *J* = 7.3 Hz, 1H), 6.93 (d, *J* = 8.6 Hz, 2H), 6.75 (d, *J* = 8.5 Hz, 2H), 3.72 (s, 3H), 3.55 (d, *J* = 13.9 Hz, 1H), 3.39 (s, 3H), 3.10 (d, *J* = 14.0 Hz, 1H); <sup>13</sup>C NMR (151 MHz, CD<sub>3</sub>OD) δ 173.4, 160.5, 144.9, 131.5, 130.6, 130.0, 128.5, 126.1, 126.0, 114.8, 111.6, 55.7, 37.5, 29.7. Positive ion ESI-MS: Calcd for C<sub>17</sub>H<sub>19</sub>ClN<sub>2</sub>O [M–Cl]<sup>+</sup>: 267.1. Found: 267.1.

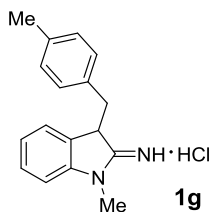

**1g**: Pale yellow solid, mp = 239 – 242 °C; <sup>1</sup>H NMR (600 MHz, DMSO-*d*<sub>6</sub>) δ 10.95 (s, 1H), 10.34 (s, 1H), 7.35 (t, *J* = 7.7 Hz, 1H), 7.21 (d, *J* = 7.9 Hz, 1H), 7.12 (t, *J* = 7.5 Hz, 1H), 7.01 (t, *J* = 9.0 Hz, 3H), 6.96 (d, *J* = 8.0 Hz, 2H), 4.62 (dd, *J* = 8.0, 4.2 Hz, 1H), 3.64 (dd, *J* = 13.8, 4.3 Hz, 1H), 3.42 (s, 3H), 3.17 (dd, *J* = 13.8, 8.4 Hz, 1H), 2.22 (s, 3H); <sup>13</sup>C NMR (151 MHz, DMSO-*d*<sub>6</sub>) δ 181.2, 153.5, 145.9, 143.2, 139.3, 139.1, 138.8, 138.4, 134.3, 134.2, 120.5, 57.1, 45.6, 39.6, 30.7. Positive ion ESI-MS: Calcd for C<sub>17</sub>H<sub>19</sub>ClN<sub>2</sub> [M–Cl]<sup>+</sup>: 251.2. Found: 251.1.

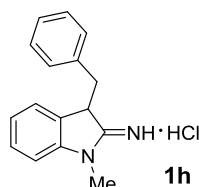

**1h**: Pale yellow solid, mp = 237 – 239 °C; <sup>1</sup>H NMR (800 MHz, CD<sub>3</sub>OD) δ 7.39 (td, *J* = 7.8, 1.2 Hz, 1H), 7.22 – 7.15 (m, 5H), 7.08 – 7.02 (m, 3H), 3.63 (d, *J* = 13.9 Hz, 1H), 3.40 (s, 3H), 3.15 (d, *J* = 13.9 Hz, 1H); <sup>13</sup>C NMR (201 MHz, CD<sub>3</sub>OD) δ 173.3, 144.8, 136.8, 130.5, 130.1, 129.4, 128.4, 126.1, 126.0, 111.6, 38.3, 29.7 (m). Positive ion ESI-MS: Calcd for C<sub>16</sub>H<sub>17</sub>ClN<sub>2</sub> [M–Cl]<sup>+</sup>: 237.1. Found: 237.1.

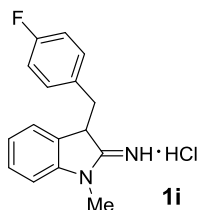

**1i**: Pale yellow solid, mp = 242 – 245 °C; <sup>1</sup>H NMR (600 MHz, CD<sub>3</sub>OD) δ 7.41 (t, *J* = 8.0 Hz, 1H), 7.24 – 7.17 (m, 2H), 7.13 (d, *J* = 7.4 Hz, 1H), 7.05 (dd, *J* = 8.2, 5.5 Hz, 2H), 6.93 (t, *J* = 8.7 Hz, 2H), 3.61 (d, *J* = 13.9 Hz, 1H), 3.41 (s, 3H), 3.19 (d, *J* = 13.9 Hz, 1H); <sup>13</sup>C NMR (151 MHz, CD<sub>3</sub>OD) δ 173.25, 163.53 (d, *J* = 244.5 Hz), 144.83, 132.68 (d, *J* = 2.3 Hz), 132.26 (d, *J* = 8.2 Hz), 130.3, 130.2, 126.2, 125.9, 116.1 (d, *J* = 21.6 Hz), 111.7, 37.4, 29.8; <sup>19</sup>F NMR (565 MHz, CD<sub>3</sub>OD) δ -117.1. Positive ion ESI-MS: Calcd for C<sub>16</sub>H<sub>16</sub>ClFN<sub>2</sub> [M – Cl]<sup>+</sup>: 255.1. Found: 255.1.

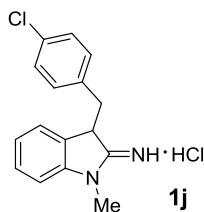

**1j**: Pale yellow solid, mp = 283 – 287 °C; <sup>1</sup>H NMR (600 MHz, CD<sub>3</sub>OD) δ 7.44 – 7.38 (m, 1H), 7.25 – 7.17 (m, 4H), 7.14 (d, *J* = 7.3 Hz, 1H), 7.03 (d, *J* = 8.3 Hz, 2H), 3.61 (d, *J* = 14.0 Hz, 1H), 3.41 (s, 3H), 3.18 (d, *J* = 13.9 Hz, 1H); <sup>13</sup>C NMR (151 MHz, CD<sub>3</sub>OD) δ 173.2, 144.8, 135.5, 134.4, 132.1, 130.2, 129.5, 126.3, 125.9, 111.8, 37.5, 29.7. Positive ion ESI-MS: Calcd for C<sub>16</sub>H<sub>16</sub>Cl<sub>2</sub>N<sub>2</sub> [M – Cl]<sup>+</sup>: 271.1. Found: 271.2.

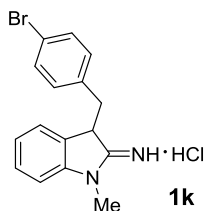

**1k**: Pale yellow solid, mp = 232 – 236 °C; <sup>1</sup>H NMR (600 MHz, DMSO-*d*<sub>6</sub>) δ 10.82 (s, 1H), 10.20 (s, 1H), 7.42 (d, *J* = 8.4 Hz, 2H), 7.38 – 7.35 (m, 1H), 7.23 (d, *J* = 7.9 Hz, 1H), 7.15 (t, *J* = 7.5 Hz, 1H), 7.04 (t, *J* = 7.4 Hz, 3H), 4.67 (dd, *J* = 7.8, 4.3 Hz, 1H), 3.64 (dd, *J* = 13.8, 4.3 Hz, 1H), 3.41 (s, 3H), 3.21 (dd, *J* = 13.8, 8.2 Hz, 1H); <sup>13</sup>C NMR (151 MHz, DMSO-*d*<sub>6</sub>) δ 171.0, 143.5, 135.7, 131.4, 131.2, 129.0, 128.6, 124.4, 124.3, 120.2, 110.6, 46.8, 35.3, 29.5. Positive ion ESI-MS: Calcd for C<sub>16</sub>H<sub>16</sub>BrClN<sub>2</sub> [M – Cl]<sup>+</sup>: 315.0. Found: 315.0.

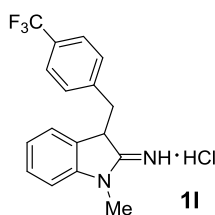

**1l:** Pale yellow solid, mp = 259 – 261 °C; <sup>1</sup>H NMR (600 MHz, CD<sub>3</sub>OD) δ 7.52 (d, *J* = 8.1 Hz, 2H), 7.41 (t, *J* = 8.1 Hz, 1H), 7.27 (d, *J* = 8.0 Hz, 2H), 7.24 – 7.17 (m, 2H), 7.12 (d, *J* = 7.4 Hz, 1H), 3.73 (d, *J* = 13.9 Hz, 1H), 3.43 (s, 3H), 3.29 (d, *J* = 14.2 Hz, 1H); <sup>13</sup>C NMR (151 MHz, CD<sub>3</sub>OD) δ 173.13, 144.81, 141.49, 131.23, 130.65 (q, *J* = 32.4 Hz), 130.3, 130.1, 126.3, 126.3, 125.9, 125.6 (q, *J* = 271.2 Hz), 111.8, 37.8, 29.8; <sup>19</sup>F NMR (565 MHz, CD<sub>3</sub>OD) δ -63.91. Positive ion ESI-MS: Calcd for C<sub>17</sub>H<sub>16</sub>ClF<sub>3</sub>N<sub>2</sub> [M – Cl]<sup>+</sup>: 305.1. Found: 305.1.

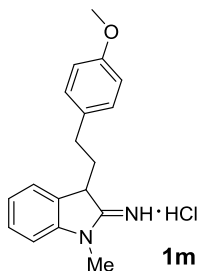

**1m:** Pale yellow solid, mp = 254 – 257 °C; <sup>1</sup>H NMR (600 MHz, CD<sub>3</sub>OD) δ 7.55 (d, *J* = 7.4 Hz, 1H), 7.50 (t, *J* = 7.9 Hz, 1H), 7.35 (t, *J* = 7.5 Hz, 1H), 7.30 (d, *J* = 7.9 Hz, 1H), 6.87 (d, *J* = 8.6 Hz, 2H), 6.78 (d, *J* = 8.7 Hz, 2H), 3.75 (s, 3H), 3.35 (s, 3H), 2.63 – 2.55 (m, 1H), 2.50 – 2.43 (m, 2H), 2.37 – 2.30 (m, 1H); <sup>13</sup>C NMR (151 MHz, CD<sub>3</sub>OD) δ 173.9, 159.9, 145.1, 133.0, 130.7, 130.3, 130.1, 126.5, 125.5, 114.8, 111.8, 55.7, 32.9, 31.0, 29.8. Positive ion ESI-MS: Calcd for C<sub>18</sub>H<sub>21</sub>ClN<sub>2</sub>O [M – Cl]<sup>+</sup>: 281.2. Found: 281.2.

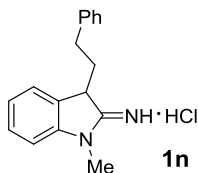

**1n:** Pale yellow solid, mp = 236 – 238 °C; <sup>1</sup>H NMR (400 MHz, DMSO-*d*<sub>6</sub>) δ 10.83 (s, 1H), 10.38 (s, 1H), 7.52 (d, *J* = 7.4 Hz, 1H), 7.39 (t, *J* = 7.7 Hz, 1H), 7.28 (d, *J* = 7.9 Hz, 1H), 7.25 – 7.15 (m, 3H), 7.13 – 7.04 (m, 3H), 4.37 (t, *J* = 4.8 Hz, 1H), 3.48 (s, 3H), 2.55 – 2.41 (m, 2H), 2.41 – 2.30 (m, 1H), 2.29 – 2.18 (m, 1H); <sup>13</sup>C NMR (101 MHz, DMSO-*d*<sub>6</sub>) δ 172.1, 144.3, 140.9, 129.9, 129.0, 128.8, 128.8, 126.6, 125.1, 124.7, 111.1, 46.4, 32.1, 31.0, 30.4. Positive ion ESI-MS: Calcd for C<sub>17</sub>H<sub>19</sub>ClN<sub>2</sub> [M – Cl]<sup>+</sup>: 251.2. Found: 251.2.

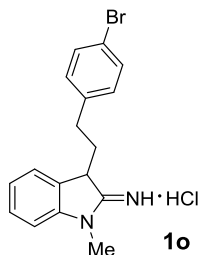

**1o**: Pale yellow solid, mp = 259 – 261 °C;  $^1\text{H}$  NMR (600 MHz,  $\text{CD}_3\text{OD}$ )  $\delta$  7.55 (d,  $J$  = 7.4 Hz, 1H), 7.53 – 7.47 (m, 1H), 7.41 – 7.28 (m, 4H), 6.94 (d,  $J$  = 8.3 Hz, 2H), 3.41 (s, 3H), 2.65 – 2.55 (m, 1H), 2.50 – 2.39 (m, 3H);  $^{13}\text{C}$  NMR (151 MHz,  $\text{CD}_3\text{OD}$ )  $\delta$  173.8, 145.0, 140.6, 132.5, 131.6, 130.2, 130.2, 126.6, 125.5, 121.2, 111.9, 47.3 (m), 32.7, 31.2, 29.8. Positive ion ESI-MS: Calcd for  $\text{C}_{17}\text{H}_{18}\text{BrClN}_2$   $[\text{M} - \text{Cl}]^+$ : 329.1. Found: 329.2.

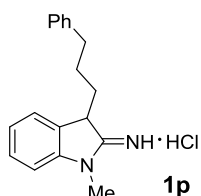

**1p**: Pale yellow solid, mp = 203 – 205 °C;  $^1\text{H}$  NMR (600 MHz,  $\text{DMSO}-d_6$ )  $\delta$  10.61 (s, 1H), 10.38 (s, 1H), 7.43 – 7.34 (m, 2H), 7.27 (d,  $J$  = 7.9 Hz, 1H), 7.23 – 7.15 (m, 3H), 7.11 (t,  $J$  = 7.3 Hz, 1H), 7.06 (d,  $J$  = 7.5 Hz, 2H), 4.33 (t,  $J$  = 5.1 Hz, 1H), 3.52 (s, 3H), 2.53 – 2.43 (m, 2H), 2.27 – 2.16 (m, 1H), 2.15 – 2.05 (m, 1H), 1.46 – 1.32 (m, 1H), 1.27 – 1.14 (m, 1H);  $^{13}\text{C}$  NMR (151 MHz,  $\text{DMSO}-d_6$ )  $\delta$  171.9, 143.6, 141.4, 129.7, 128.4, 128.3, 128.2, 125.8, 124.5, 124.0, 110.6, 45.9, 35.0, 30.3, 29.8, 26.2. Positive ion ESI-MS: Calcd for  $\text{C}_{18}\text{H}_{21}\text{ClN}_2$   $[\text{M} - \text{Cl}]^+$ : 265.2. Found: 265.2.

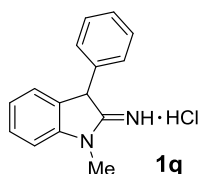

**1q**: Pale yellow solid, mp = 274 – 277 °C;  $^1\text{H}$  NMR (800 MHz,  $\text{CD}_3\text{OD}$ )  $\delta$  7.48 (td,  $J$  = 8.0, 1.2 Hz, 1H), 7.44 – 7.36 (m, 4H), 7.29 – 7.26 (m, 2H), 7.23 (td,  $J$  = 7.5, 0.9 Hz, 1H), 7.21 – 7.18 (m, 1H), 3.67 (s, 3H);  $^{13}\text{C}$  NMR (201 MHz,  $\text{CD}_3\text{OD}$ )  $\delta$  173.6, 144.5, 136.7, 132.6, 130.6, 130.3, 129.8, 129.7, 126.8, 125.7, 112.0, 30.4. Positive ion ESI-MS: Calcd for  $\text{C}_{15}\text{H}_{15}\text{ClN}_2$   $[\text{M} - \text{Cl}]^+$ : 223.1. Found: 223.0.



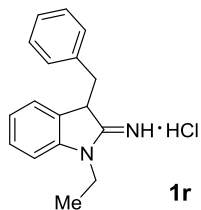

**1r:** Pale yellow solid, mp = 255 – 258 °C; <sup>1</sup>H NMR (800 MHz, CD<sub>3</sub>OD) δ 7.41 (td, *J* = 7.8, 1.2 Hz, 1H), 7.31 (d, *J* = 7.4 Hz, 1H), 7.25 (td, *J* = 7.5, 0.7 Hz, 1H), 7.19 – 7.12 (m, 4H), 6.93 (d, *J* = 7.2 Hz, 2H), 3.90 – 3.83 (m, 2H), 3.61 (d, *J* = 13.9 Hz, 1H), 3.27 (d, *J* = 13.9 Hz, 1H), 1.00 (t, *J* = 7.3 Hz, 3H); <sup>13</sup>C NMR (201 MHz, CD<sub>3</sub>OD) δ 172.4, 143.9, 136.2, 130.8, 130.5, 130.2, 129.3, 128.5, 126.2, 126.1, 111.7, 38.7, 38.2, 11.6. Positive ion ESI-MS: Calcd for C<sub>17</sub>H<sub>19</sub>ClN<sub>2</sub> [M – Cl]<sup>+</sup>: 251.2. Found: 251.1.

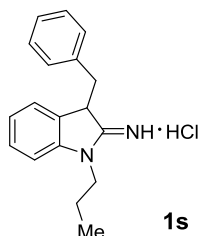

**1s:** Pale yellow solid, mp = 239 – 241 °C; <sup>1</sup>H NMR (800 MHz, CD<sub>3</sub>OD) δ 7.40 (t, *J* = 7.7 Hz, 1H), 7.34 (d, *J* = 7.3 Hz, 1H), 7.25 (t, *J* = 7.5 Hz, 1H), 7.19 – 7.10 (m, 4H), 6.94 (d, *J* = 7.5 Hz, 2H), 3.86 – 3.80 (m, 1H), 3.80 – 3.74 (m, 1H), 3.63 (d, *J* = 14.0 Hz, 1H), 3.31 – 3.28 (m, 1H), 1.45 (m, 2H), 0.75 (t, *J* = 7.3 Hz, 3H); <sup>13</sup>C NMR (201 MHz, CD<sub>3</sub>OD) δ 172.6, 144.5, 136.2, 130.6, 130.6, 130.1, 129.3, 128.5, 126.2, 126.1, 112.0, 45.2, 38.0, 21.0, 11.1. Positive ion ESI-MS: Calcd for C<sub>18</sub>H<sub>21</sub>ClN<sub>2</sub> [M – Cl]<sup>+</sup>: 265.2. Found: 265.2.

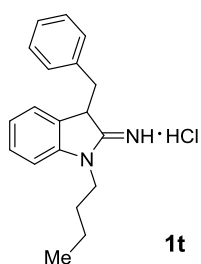

**1t:** Pale yellow solid, mp = 235 – 237 °C; <sup>1</sup>H NMR (800 MHz, CD<sub>3</sub>OD) δ 7.41 (td, *J* = 7.8, 1.2 Hz, 1H), 7.38 (d, *J* = 7.5 Hz, 1H), 7.27 (td, *J* = 7.5, 0.8 Hz, 1H), 7.18 – 7.09 (m, 4H), 6.92 (d, *J* = 7.2 Hz, 2H), 3.87 – 3.77 (m, 2H), 3.62 (d, *J* = 14.0 Hz, 1H), 3.33 (d, *J* = 14.0 Hz, 1H), 1.41 – 1.29 (m, 2H), 1.15 – 1.04 (m, 2H), 0.84 (t, *J* = 7.4 Hz, 3H); <sup>13</sup>C NMR (201 MHz, CD<sub>3</sub>OD) δ 172.5, 144.5, 136.1,

130.6, 130.6, 130.1, 129.3, 128.5, 126.2, 126.1, 112.0, 43.7, 37.9, 29.8, 20.7, 14.2. Positive ion ESI-MS: Calcd for  $C_{19}H_{23}ClN_2$   $[M-Cl]^+$ : 279.2. Found: 279.1.

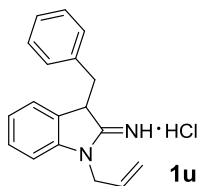

**1u**: Pale yellow solid, mp = 237 – 240 °C;  $^1H$  NMR (800 MHz,  $CD_3OD$ )  $\delta$  7.38 (td,  $J$  = 7.8, 1.1 Hz, 1H), 7.34 (d,  $J$  = 7.0 Hz, 1H), 7.25 (t,  $J$  = 7.9 Hz, 1H), 7.19 – 7.16 (m, 1H), 7.13 (t,  $J$  = 7.4 Hz, 2H), 7.07 (d,  $J$  = 8.0 Hz, 1H), 6.96 (d,  $J$  = 7.3 Hz, 2H), 5.66 – 5.58 (m, 1H), 5.02 (d,  $J$  = 10.6 Hz, 1H), 4.62 – 4.52 (m, 2H), 4.52 – 4.45 (m, 1H), 3.66 (d,  $J$  = 14.0 Hz, 1H), 3.34 (d,  $J$  = 14.0 Hz, 1H);  $^{13}C$  NMR (201 MHz,  $CD_3OD$ )  $\delta$  172.9, 144.2, 136.3, 130.7, 130.4, 130.1, 129.4, 129.2 (d,  $J$  = 3.4 Hz), 128.5, 126.2, 126.0, 118.2 (d,  $J$  = 3.2 Hz), 112.1, 45.8, 37.9. Positive ion ESI-MS: Calcd for  $C_{18}H_{19}ClN_2$   $[M-Cl]^+$ : 263.2. Found: 263.2.

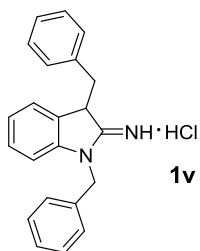

**1v**: Pale yellow solid, mp = 233 – 237 °C;  $^1H$  NMR (400 MHz,  $CD_3OD$ )  $\delta$  7.50 – 7.42 (m, 1H), 7.33 – 7.10 (m, 8H), 7.01 – 6.94 (m, 2H), 6.93 – 6.86 (m, 1H), 6.77 – 6.61 (m, 2H), 5.23 (d,  $J$  = 17.0 Hz, 1H), 5.05 (d,  $J$  = 17.0 Hz, 1H), 3.73 (d,  $J$  = 14.0 Hz, 1H), 3.46 (d,  $J$  = 14.1 Hz, 1H);  $^{13}C$  NMR (101 MHz,  $CD_3OD$ )  $\delta$  173.43, 144.36, 136.32, 133.64, 130.82, 130.48, 130.14, 130.07, 129.60, 129.05, 128.68, 127.29, 126.38, 126.06, 112.53, 47.31, 37.41. Positive ion ESI-MS: Calcd for  $C_{22}H_{21}ClN_2$   $[M-Cl]^+$ : 313.2. Found: 313.2.

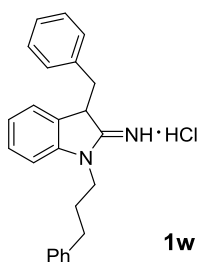

**1w**: Pale yellow solid, mp = 230 – 232 °C;  $^1H$  NMR (600 MHz,  $CD_3OD$ )  $\delta$  7.37 (t,  $J$  = 8.1 Hz, 1H), 7.34 (d,  $J$  = 7.0 Hz, 1H), 7.29 – 7.22 (m, 3H), 7.19 (t,  $J$  = 7.3 Hz, 1H), 7.13 – 7.03 (m, 5H),

6.98 (d,  $J = 7.9$  Hz, 1H), 6.91 (d,  $J = 6.9$  Hz, 2H), 3.95 – 3.77 (m, 2H), 3.60 (d,  $J = 13.9$  Hz, 1H), 3.27 (d,  $J = 13.9$  Hz, 1H), 2.55 – 2.45 (m, 2H), 1.73 – 1.59 (m, 2H);  $^{13}\text{C}$  NMR (151 MHz,  $\text{CD}_3\text{OD}$ )  $\delta$  172.7, 144.3, 141.8, 136.1, 130.7, 130.5, 130.1, 129.5, 129.3, 128.6, 127.3, 126.3, 126.1, 111.8, 43.4, 38.0, 33.3, 28.9. Positive ion ESI-MS: Calcd for  $\text{C}_{24}\text{H}_{25}\text{ClN}_2$   $[\text{M}-\text{Cl}]^+$ : 341.2. Found: 341.1.

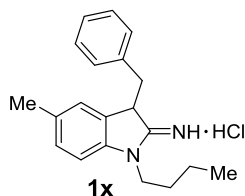

**1x**: Pale yellow solid, mp = 237 – 239 °C;  $^1\text{H}$  NMR (600 MHz,  $\text{DMSO}-d_6$ )  $\delta$  10.85 (s, 1H), 10.20 (s, 1H), 7.17 – 7.11 (m, 5H), 7.07 (d,  $J = 8.5$  Hz, 1H), 6.96 – 6.90 (m, 2H), 4.67 – 4.58 (m, 1H), 3.96 – 3.89 (m, 1H), 3.81 – 3.75 (m, 1H), 3.62 – 3.55 (m, 1H), 3.47 – 3.41 (m, 1H), 2.30 (s, 3H), 1.27 – 1.18 (m, 2H), 1.03 – 0.92 (m, 2H), 0.73 (t,  $J = 7.3$  Hz, 3H);  $^{13}\text{C}$  NMR (151 MHz,  $\text{DMSO}-d_6$ )  $\delta$  170.1, 140.8, 135.6, 133.6, 129.4, 129.3, 128.8, 128.0, 126.9, 125.2, 110.4, 47.1, 42.0, 35.6, 28.4, 20.8, 18.9, 13.8. Positive ion ESI-MS: Calcd for  $\text{C}_{20}\text{H}_{25}\text{ClN}_2$   $[\text{M}-\text{Cl}]^+$ : 293.2. Found: 293.1.

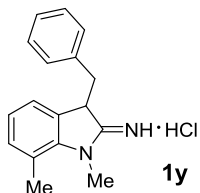

**1y**: Pale yellow solid, mp = 257 – 259 °C;  $^1\text{H}$  NMR (600 MHz,  $\text{CD}_3\text{OD}$ )  $\delta$  7.22 – 7.16 (m, 3H), 7.13 (d,  $J = 7.6$  Hz, 1H), 7.06 (t,  $J = 7.6$  Hz, 1H), 7.03 – 6.99 (m, 2H), 6.94 (d,  $J = 7.3$  Hz, 1H), 3.61 – 3.57 (m, 4H), 3.16 (d,  $J = 13.8$  Hz, 1H), 2.54 (s, 3H);  $^{13}\text{C}$  NMR (151 MHz,  $\text{CD}_3\text{OD}$ )  $\delta$  173.8, 142.6, 136.7, 134.0, 131.2, 130.5, 129.4, 128.4, 126.1, 123.9, 123.7, 38.7, 33.5, 19.0. Positive ion ESI-MS: Calcd for  $\text{C}_{17}\text{H}_{19}\text{ClN}_2$   $[\text{M}-\text{Cl}]^+$ : 251.2. Found: 251.1.

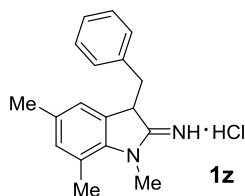

**1z**: Pale yellow solid, mp = 258 – 260 °C;  $^1\text{H}$  NMR (600 MHz,  $\text{CD}_3\text{OD}$ )  $\delta$  7.26 – 7.15 (m, 3H), 7.04 – 6.97 (m, 2H), 6.95 (s, 1H), 6.76 (s, 1H), 3.60 – 3.51 (m, 4H), 3.14 (d,  $J = 13.8$  Hz, 1H), 2.49 (s, 3H), 2.25 (s, 3H);  $^{13}\text{C}$  NMR (151 MHz,  $\text{CD}_3\text{OD}$ )  $\delta$  173.5, 140.3, 136.7, 136.2, 134.4,

131.3, 130.5, 129.4, 128.4, 124.5, 123.3, 38.6, 33.3, 20.9, 18.8. Positive ion ESI-MS: Calcd for  $C_{18}H_{21}ClN_2$   $[M-Cl]^+$ : 265.2. Found: 265.2.

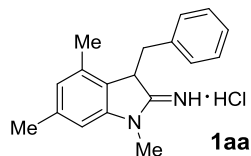

**1aa**: Pale yellow solid, mp = 262 – 264 °C;  $^1H$  NMR (600 MHz, DMSO- $d_6$ )  $\delta$  11.05 (s, 1H), 10.32 (s, 1H), 7.12 – 7.04 (m, 3H), 6.84 (s, 1H), 6.82 – 6.77 (m, 2H), 6.75 (s, 1H), 4.66 (s, 1H), 3.63 – 3.59 (m, 1H), 3.54 – 3.48 (m, 1H), 3.24 (s, 3H), 2.36 (s, 3H), 2.26 (s, 3H);  $^{13}C$  NMR (151 MHz, DMSO- $D_6$ )  $\delta$  171.3, 143.6, 138.2, 135.3, 134.1, 128.8, 127.9, 126.9, 126.9, 124.0, 108.6, 46.6, 34.4, 29.4, 21.1, 18.1. Positive ion ESI-MS: Calcd for  $C_{18}H_{21}ClN_2$   $[M-Cl]^+$ : 265.2. Found: 265.2.

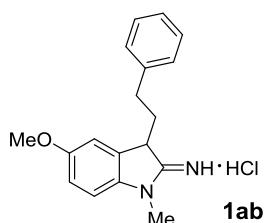

**1ab**: Pale yellow solid, mp = 255 – 257 °C;  $^1H$  NMR (600 MHz, DMSO- $d_6$ )  $\delta$  10.44 (s, 1H), 10.00 (s, 1H), 7.27 – 7.21 (m, 3H), 7.20 – 7.15 (m, 2H), 7.10 (d,  $J$  = 7.3 Hz, 2H), 6.99 (dd,  $J$  = 8.6, 2.4 Hz, 1H), 4.39 (t,  $J$  = 4.8 Hz, 1H), 3.78 (s, 3H), 3.45 (s, 3H), 2.56 – 2.45 (m, 2H), 2.40 – 2.34 (m, 1H), 2.31 – 2.24 (m, 1H);  $^{13}C$  NMR (151 MHz, DMSO- $d_6$ )  $\delta$  170.9, 157.1, 140.4, 137.1, 130.7, 128.3, 128.3, 126.1, 113.0, 111.2, 111.0, 55.8, 46.1, 31.2, 30.2, 29.7. Positive ion ESI-MS: Calcd for  $C_{18}H_{21}ClN_2O$   $[M-Cl]^+$ : 281.2. Found: 281.2.

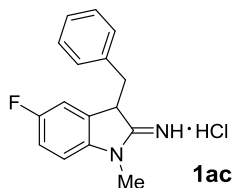

**1ac**: Pale yellow solid, mp = 260 – 263 °C;  $^1H$  NMR (600 MHz,  $CD_3OD$ )  $\delta$  7.25 – 7.22 (m, 3H), 7.19 – 7.16 (m, 1H), 7.15 – 7.11 (m, 1H), 7.10 – 7.07 (m, 2H), 6.80 (dd,  $J$  = 8.1, 2.5 Hz, 1H), 3.64 (d,  $J$  = 14.0 Hz, 1H), 3.40 (s, 3H), 3.16 (d,  $J$  = 13.8 Hz, 1H);  $^{13}C$  NMR (151 MHz,  $CD_3OD$ )  $\delta$  173.4, 161.7 (d,  $J$  = 242.6 Hz), 141.0, 136.5, 132.6 (d,  $J$  = 9.3 Hz), 130.5, 129.6, 128.6, 116.4 (d,  $J$  = 24.5 Hz), 113.9 (d,  $J$  = 26.5 Hz), 112.8 (d,  $J$  = 8.8 Hz), 38.1, 30.0;  $^{19}F$  NMR (565 MHz,  $CD_3OD$ )  $\delta$  -119.3. Positive ion ESI-MS: Calcd for  $C_{16}H_{16}ClFN_2$   $[M-Cl]^+$ : 255.1. Found: 255.1.

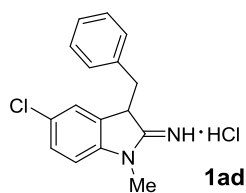

**1ad:** Pale yellow solid, mp = 250 – 253 °C; <sup>1</sup>H NMR (800 MHz, CD<sub>3</sub>OD) δ 7.40 (dd, *J* = 8.4, 2.1 Hz, 1H), 7.28 – 7.22 (m, 3H), 7.17 (d, *J* = 8.5 Hz, 1H), 7.09 – 7.05 (m, 2H), 7.01 (d, *J* = 2.0 Hz, 1H), 3.62 (d, *J* = 13.9 Hz, 1H), 3.39 (s, 3H), 3.13 (d, *J* = 13.9 Hz, 1H); <sup>13</sup>C NMR (201 MHz, CD<sub>3</sub>OD) δ 173.5, 143.6, 136.5, 132.5, 131.6, 130.4, 130.0, 129.6, 128.7, 126.4, 112.9, 38.1, 29.9. Positive ion ESI-MS: Calcd for C<sub>16</sub>H<sub>16</sub>Cl<sub>2</sub>N<sub>2</sub> [M – Cl]<sup>+</sup>: 271.1. Found: 271.1.

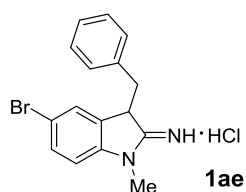

**1ae:** Pale yellow solid, mp = 248 – 250 °C; <sup>1</sup>H NMR (800 MHz, CD<sub>3</sub>OD) δ 7.55 (dd, *J* = 8.4, 2.0 Hz, 1H), 7.28 – 7.23 (m, 3H), 7.14 (d, *J* = 1.9 Hz, 1H), 7.12 (d, *J* = 8.4 Hz, 1H), 7.09 – 7.05 (m, 2H), 3.62 (d, *J* = 13.9 Hz, 1H), 3.39 (s, 3H), 3.12 (d, *J* = 13.9 Hz, 1H); <sup>13</sup>C NMR (201 MHz, CD<sub>3</sub>OD) δ 173.4, 144.1, 136.5, 133.0, 132.8, 130.5, 129.6, 129.2, 128.7, 118.9, 113.3, 38.1, 29.9. Positive ion ESI-MS: Calcd for C<sub>16</sub>H<sub>16</sub>BrClN<sub>2</sub> [M – Cl]<sup>+</sup>: 315.0. Found: 315.1.

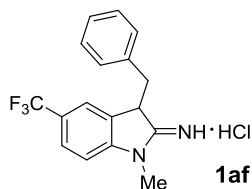

**1af:** Pale yellow solid, mp = 248 – 251 °C; <sup>1</sup>H NMR (600 MHz, CD<sub>3</sub>OD) δ 7.72 (d, *J* = 8.2 Hz, 1H), 7.37 (d, *J* = 8.3 Hz, 1H), 7.28 – 7.22 (m, 3H), 7.19 (s, 1H), 7.11 – 7.05 (m, 2H), 3.71 (d, *J* = 13.7 Hz, 1H), 3.48 (s, 3H), 3.13 (d, *J* = 13.7 Hz, 1H); <sup>13</sup>C NMR (151 MHz, CD<sub>3</sub>OD) δ 174.4, 147.9, 136.6, 131.6, 130.5, 129.7, 128.7, 128.0 (d, *J* = 33.2 Hz), 126.4 (q, *J* = 4.7 Hz), 125.5 (q, *J* = 270.9 Hz), 121.8 (q, *J* = 4.0 Hz), 112.1, 38.2, 30.1; <sup>19</sup>F NMR (565 MHz, CD<sub>3</sub>OD) δ –63.5. Positive ion ESI-MS: Calcd for C<sub>17</sub>H<sub>16</sub>ClF<sub>3</sub>N<sub>2</sub> [M – Cl]<sup>+</sup>: 305.1. Found: 305.1.

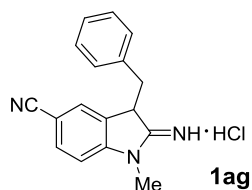

**1ag**: Pale yellow solid, mp = 242 – 245 °C; <sup>1</sup>H NMR (800 MHz, CD<sub>3</sub>OD) δ 7.78 (dd, *J* = 8.3, 1.6 Hz, 1H), 7.36 (d, *J* = 8.3 Hz, 1H), 7.30 (d, *J* = 1.4 Hz, 1H), 7.28 – 7.22 (m, 3H), 7.11 – 7.05 (m, 2H), 3.68 (d, *J* = 13.9 Hz, 1H), 3.45 (s, 3H), 3.19 (d, *J* = 13.9 Hz, 1H); <sup>13</sup>C NMR (201 MHz, CD<sub>3</sub>OD) δ 174.6, 148.6, 136.4, 135.2, 131.9, 130.5, 129.7, 129.4, 128.8, 119.3, 112.7, 109.3, 38.0, 30.1. ESI-MS: Calcd for C<sub>17</sub>H<sub>16</sub>ClN<sub>3</sub> [M – Cl]<sup>+</sup>: 262.1. Found: 262.0.

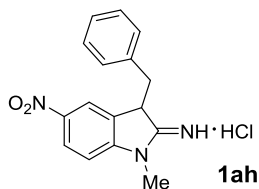

**1ah**: Pale yellow solid, mp = 189 – 192 °C; <sup>1</sup>H NMR (800 MHz, CD<sub>3</sub>OD) δ 8.34 (dd, *J* = 8.7, 2.2 Hz, 1H), 7.84 – 7.79 (m, 1H), 7.39 (d, *J* = 8.7 Hz, 1H), 7.30 – 7.24 (m, 3H), 7.12 – 7.07 (m, 2H), 3.71 (d, *J* = 13.9 Hz, 1H), 3.49 (s, 3H), 3.17 (d, *J* = 13.9 Hz, 1H); <sup>13</sup>C NMR (201 MHz, CD<sub>3</sub>OD) δ 175.3, 149.9, 146.4, 136.3, 131.9, 130.5, 129.8, 128.9, 126.7, 121.5, 112.1, 38.1, 30.3. Positive ion ESI-MS: Calcd for C<sub>16</sub>H<sub>16</sub>ClN<sub>3</sub>O<sub>2</sub> [M – Cl]<sup>+</sup>: 282.1. Found: 282.2.

### 3. Synthesis and Characterization Data of 3a-an, 4, 5a-f.

#### 3.1. General Procedures for Preparation of 3a-an

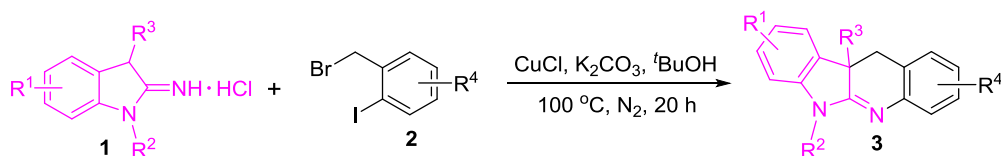

An oven-dried Schlenk tube equipped with a Teflon screw seal was charged with a magnetic stirbar,  $\text{CuCl}$  (30  $\mu\text{mol}$ , 10 mol%), **1** (0.33 mmol, 1.1 equiv), **2** (0.3 mmol, 1.0 equiv) and  $\text{K}_2\text{CO}_3$  (1.2 mmol, 4.0 equiv). The tube was evacuated and backfilled with argon; this procedure was carried out three times. The solids were dissolved in  $t\text{BuOH}$  (3.0 mL), the tube was sealed, and the reaction mixture was stirred in a pre-heated oil-bath at  $100\text{ }^\circ\text{C}$  for 20 h. The solvent was then removed under vacuum, and the residue was purified by column chromatography on silica to give the desired product **3**.

#### 3.2. Characterization of 3a-an

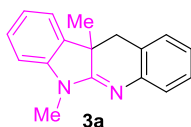

**3a**: Pale yellow solid, mp =  $187 - 189\text{ }^\circ\text{C}$ ; Eluent: petroleum ether/EtOAc 10:1;  $^1\text{H NMR}$  (400 MHz,  $\text{CDCl}_3$ )  $\delta$  7.27 – 7.18 (m, 4H), 7.14 (d,  $J = 7.2\text{ Hz}$ , 1H), 7.02 – 6.93 (m, 2H), 6.80 (d,  $J = 7.8\text{ Hz}$ , 1H), 3.35 (s, 3H), 3.05 – 2.94 (m, 2H), 1.17 (s, 3H);  $^{13}\text{C NMR}$  (101 MHz,  $\text{CDCl}_3$ )  $\delta$  171.0, 145.7, 145.6, 135.3, 128.6, 128.1, 127.8, 124.2, 123.4, 123.1, 122.1, 121.2, 107.6, 41.1, 35.4, 27.6, 22.5. ESI-MS: Calcd for  $\text{C}_{17}\text{H}_{17}\text{N}_2$   $[\text{M}+\text{H}]^+$ : 249.1. Found: 249.0. HRMS (ESI $^+$ ): Calcd for  $\text{C}_{17}\text{H}_{17}\text{N}_2$ ,  $[\text{M}+\text{H}]^+ m/z$  249.1392. Found 249.1389.

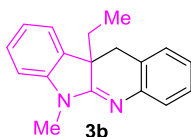

**3b**: Light yellow oil, Eluent: petroleum ether/EtOAc 10:1;  $^1\text{H NMR}$  (400 MHz,  $\text{CDCl}_3$ )  $\delta$  7.26 (td,  $J = 7.7, 1.2\text{ Hz}$ , 1H), 7.23 – 7.16 (m, 3H), 7.12 (d,  $J = 7.5\text{ Hz}$ , 1H), 7.01 – 6.94 (m, 2H), 6.80 (d,  $J = 7.8\text{ Hz}$ , 1H), 3.35 (s, 3H), 3.07 (d,  $J = 15.6\text{ Hz}$ , 1H), 2.99 (d,  $J = 15.6\text{ Hz}$ , 1H), 1.75 – 1.63 (m,

1H), 1.55 – 1.43 (m, 1H), 0.61 (t,  $J = 7.4$  Hz, 3H);  $^{13}\text{C}$  NMR (101 MHz,  $\text{CDCl}_3$ )  $\delta$  170.6, 146.7, 145.9, 133.4, 128.6, 128.2, 127.9, 124.2, 123.4, 123.1, 122.8, 121.1, 107.4, 45.5, 33.9, 27.7, 27.6, 8.3. ESI-MS: Calcd for  $\text{C}_{18}\text{H}_{19}\text{N}_2$   $[\text{M}+\text{H}]^+$ : 263.1. Found: 263.0. HRMS (ESI $^+$ ): Calcd for  $\text{C}_{18}\text{H}_{19}\text{N}_2$ ,  $[\text{M}+\text{H}]^+$   $m/z$  263.1548. Found 263.1545.

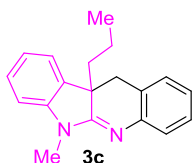

**3c:** Light yellow oil; Eluent: petroleum ether/EtOAc 10:1;  $^1\text{H}$  NMR (400 MHz,  $\text{CDCl}_3$ )  $\delta$  7.29 – 7.20 (m, 3H), 7.18 (d,  $J = 7.3$  Hz, 1H), 7.12 (d,  $J = 7.2$  Hz, 1H), 7.02 – 6.92 (m, 2H), 6.79 (d,  $J = 7.8$  Hz, 1H), 3.34 (s, 3H), 3.09 – 2.96 (m, 2H), 1.65 (td,  $J = 12.8, 4.5$  Hz, 1H), 1.40 (td,  $J = 12.8, 4.5$  Hz, 1H), 1.16 – 1.02 (m, 1H), 0.99 – 0.85 (m, 1H), 0.66 – 0.59 (m, 3H);  $^{13}\text{C}$  NMR (101 MHz,  $\text{CDCl}_3$ )  $\delta$  170.5, 146.5, 145.8, 133.7, 128.5, 128.1, 127.8, 124.1, 123.3, 123.0, 122.6, 121.2, 107.3, 45.1, 37.0, 34.4, 27.5, 17.0, 14.0. ESI-MS: Calcd for  $\text{C}_{19}\text{H}_{21}\text{N}_2$   $[\text{M}+\text{H}]^+$ : 277.2. Found: 277.0. HRMS (ESI $^+$ ): Calcd for  $\text{C}_{19}\text{H}_{21}\text{N}_2$ ,  $[\text{M}+\text{H}]^+$   $m/z$  277.1705. Found 277.1704.

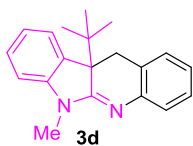

**3d:** Light yellow oil; Eluent: petroleum ether/EtOAc 10:1;  $^1\text{H}$  NMR (400 MHz,  $\text{CDCl}_3$ )  $\delta$  7.27 – 7.22 (m, 1H), 7.21 – 7.14 (m, 3H), 7.08 (d,  $J = 7.3$  Hz, 1H), 6.99 – 6.89 (m, 2H), 6.77 (d,  $J = 7.8$  Hz, 1H), 3.45 (d,  $J = 16.9$  Hz, 1H), 3.35 (s, 3H), 3.01 (d,  $J = 16.8$  Hz, 1H), 0.73 (s, 9H);  $^{13}\text{C}$  NMR (101 MHz,  $\text{CDCl}_3$ )  $\delta$  169.5, 147.5, 146.5, 134.8, 128.0, 127.7, 127.3, 124.7, 124.1, 123.9, 120.1, 107.0, 49.8, 38.7, 31.8, 28.0, 26.3. ESI-MS: Calcd for  $\text{C}_{20}\text{H}_{23}\text{N}_2$   $[\text{M}+\text{H}]^+$ : 291.2. Found: 291.0. HRMS (ESI $^+$ ): Calcd for  $\text{C}_{20}\text{H}_{23}\text{N}_2$ ,  $[\text{M}+\text{H}]^+$   $m/z$  291.1861. Found 291.1860.

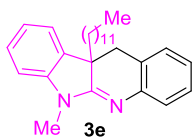

**3e:** Light yellow oil; Eluent: petroleum ether/EtOAc 10:1;  $^1\text{H}$  NMR (600 MHz,  $\text{CDCl}_3$ )  $\delta$  7.25 (td,  $J = 7.7, 1.0$  Hz, 1H), 7.23 – 7.20 (m, 2H), 7.18 (d,  $J = 7.2$  Hz, 1H), 7.12 (d,  $J = 7.3$  Hz, 1H), 7.00 – 6.94 (m, 2H), 6.80 (d,  $J = 7.8$  Hz, 1H), 3.35 (s, 3H), 3.06 (d,  $J = 15.5$  Hz, 1H), 2.99 (d,  $J = 15.5$  Hz, 1H), 1.63 (td,  $J = 12.9, 4.4$  Hz, 1H), 1.43 (td,  $J = 12.7, 4.2$  Hz, 1H), 1.29 – 0.95 (m, 20H), 0.86 (t,



$J = 7.1$  Hz, 3H);  $^{13}\text{C}$  NMR (151 MHz,  $\text{CDCl}_3$ )  $\delta$  170.7, 146.7, 145.9, 133.8, 128.6, 128.2, 127.9, 124.2, 123.4, 123.1, 122.8, 121.1, 107.4, 45.1, 34.8, 34.5, 32.0, 29.7, 29.6, 29.5, 29.4, 29.4, 27.6, 23.7, 22.8, 14.2. ESI-MS: Calcd for  $\text{C}_{28}\text{H}_{39}\text{N}_2$   $[\text{M}+\text{H}]^+$ : 403.3. Found: 403.1. HRMS (ESI $^+$ ): Calcd for  $\text{C}_{28}\text{H}_{39}\text{N}_2$ ,  $[\text{M}+\text{H}]^+$   $m/z$  403.3113. Found 403.3128.

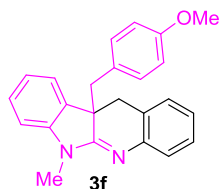

**3f**: Light yellow oil; Eluent: petroleum ether/EtOAc 10:1;  $^1\text{H}$  NMR (600 MHz,  $\text{CDCl}_3$ )  $\delta$  7.32 (d,  $J = 7.5$  Hz, 1H), 7.27 (t,  $J = 7.5$  Hz, 1H), 7.22 – 7.16 (m, 2H), 7.05 (t,  $J = 7.2$  Hz, 1H), 6.90 (d,  $J = 4.3$  Hz, 2H), 6.66 – 6.59 (m, 3H), 6.57 (d,  $J = 8.5$  Hz, 2H), 3.70 (s, 3H), 3.14 (s, 3H), 3.10 (d,  $J = 15.7$  Hz, 1H), 2.95 (d,  $J = 15.6$  Hz, 1H), 2.73 – 2.60 (m, 2H);  $^{13}\text{C}$  NMR (151 MHz,  $\text{CDCl}_3$ )  $\delta$  169.7, 158.2, 146.2, 145.8, 132.4, 131.0, 128.7, 128.2, 127.9, 127.7, 124.4, 123.5, 122.9, 120.5, 112.7, 107.2, 55.0, 46.2, 39.0, 33.1, 27.2. ESI-MS: Calcd for  $\text{C}_{24}\text{H}_{23}\text{N}_2\text{O}$   $[\text{M}+\text{H}]^+$ : 355.2. Found: 355.1. HRMS (ESI $^+$ ): Calcd for  $\text{C}_{24}\text{H}_{23}\text{N}_2\text{O}$ ,  $[\text{M}+\text{H}]^+$   $m/z$  355.1810. Found 355.1814.

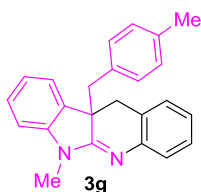

**3g**: Pale yellow solid; mp = 154 – 156  $^{\circ}\text{C}$ ; Eluent: petroleum ether/EtOAc 10:1;  $^1\text{H}$  NMR (400 MHz,  $\text{CDCl}_3$ )  $\delta$  7.35 – 7.24 (m, 2H), 7.23 – 7.16 (m, 2H), 7.05 (td,  $J = 7.3, 1.4$  Hz, 1H), 6.94 – 6.83 (m, 4H), 6.61 (d,  $J = 7.8$  Hz, 1H), 6.55 (d,  $J = 7.9$  Hz, 2H), 3.15 (s, 3H), 3.11 (d,  $J = 15.7$  Hz, 1H), 2.94 (d,  $J = 15.7$  Hz, 1H), 2.68 (s, 2H), 2.24 (s, 3H);  $^{13}\text{C}$  NMR (101 MHz,  $\text{CDCl}_3$ )  $\delta$  169.9, 146.4, 145.94, 136.0, 132.6, 132.5, 130.1, 128.8, 128.3, 128.2, 128.1, 124.5, 123.8, 123.7, 123.1, 120.5, 107.3, 46.3, 39.5, 33.2, 27.3, 21.1. ESI-MS: Calcd for  $\text{C}_{24}\text{H}_{23}\text{N}_2$   $[\text{M}+\text{H}]^+$ : 339.2. Found: 339.0. HRMS (ESI $^+$ ): Calcd for  $\text{C}_{24}\text{H}_{23}\text{N}_2$ ,  $[\text{M}+\text{H}]^+$   $m/z$  339.1861. Found 339.1886.

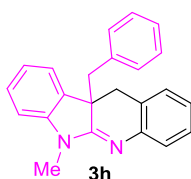

**3h**: Light yellow oil; Eluent: petroleum ether/EtOAc 10:1;  $^1\text{H}$  NMR (400 MHz,  $\text{CDCl}_3$ )  $\delta$  7.35 – 7.31 (m, 1H), 7.28 (t,  $J = 7.5$  Hz, 1H), 7.24 – 7.16 (m, 2H), 7.14 – 7.04 (m, 4H), 6.94 – 6.87 (m,

2H), 6.65 (dd,  $J = 7.7, 1.4$  Hz, 2H), 6.58 (d,  $J = 7.8$  Hz, 1H), 3.16 – 3.09 (m, 4H), 2.98 (d,  $J = 15.7$  Hz, 1H), 2.77 (d,  $J = 12.8$  Hz, 1H), 2.69 (d,  $J = 12.8$  Hz, 1H);  $^{13}\text{C}$  NMR (101 MHz,  $\text{CDCl}_3$ )  $\delta$  169.6, 146.4, 145.9, 135.7, 132.3, 130.2, 128.9, 128.4, 128.1, 127.4, 126.6, 124.6, 123.7, 123.7, 123.0, 120.6, 107.3, 46.3, 40.0, 33.4, 27.2. ESI-MS: Calcd for  $\text{C}_{23}\text{H}_{21}\text{N}_2$   $[\text{M}+\text{H}]^+$ : 325.2. Found: 325.1. HRMS (ESI $^+$ ): Calcd for  $\text{C}_{23}\text{H}_{21}\text{N}_2$ ,  $[\text{M}+\text{H}]^+$   $m/z$  325.1705. Found 325.1712.

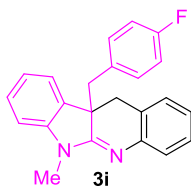

**3i:** Pale yellow solid, mp = 138 – 140 °C; Eluent: petroleum ether/EtOAc 10:1;  $^1\text{H}$  NMR (600 MHz,  $\text{CDCl}_3$ )  $\delta$  7.35 – 7.26 (m, 2H), 7.24 – 7.16 (m, 2H), 7.05 (t,  $J = 7.2$  Hz, 1H), 6.97 (d,  $J = 7.0$  Hz, 1H), 6.93 (t,  $J = 7.4$  Hz, 1H), 6.75 (t,  $J = 8.6$  Hz, 2H), 6.58 (t,  $J = 6.6$  Hz, 3H), 3.09 (d,  $J = 13.2$  Hz, 4H), 3.01 (d,  $J = 15.7$  Hz, 1H), 2.79 (d,  $J = 13.1$  Hz, 1H);  $^{13}\text{C}$  NMR (151 MHz,  $\text{CDCl}_3$ )  $\delta$  169.1, 161.7 (d,  $J = 244.4$  Hz), 146.2, 145.7, 132.0, 131.3 (d,  $J = 7.2$  Hz), 128.7, 128.4, 128.1, 124.5, 123.7, 123.3, 122.8, 120.7, 114.1 (d,  $J = 20.9$  Hz), 107.2, 46.3, 39.2, 33.5, 27.1. ESI-MS: Calcd for  $\text{C}_{23}\text{H}_{20}\text{FN}_2$   $[\text{M}+\text{H}]^+$ : 343.2. Found: 343.1. HRMS (ESI $^+$ ): Calcd for  $\text{C}_{23}\text{H}_{20}\text{FN}_2$ ,  $[\text{M}+\text{H}]^+$   $m/z$  343.1611. Found 343.1628.

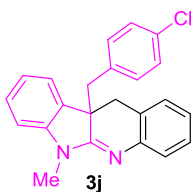

**3j:** Light yellow oil; Eluent: petroleum ether/EtOAc 10:1;  $^1\text{H}$  NMR (600 MHz,  $\text{CDCl}_3$ )  $\delta$  7.34 – 7.26 (m, 2H), 7.22 – 7.17 (m, 2H), 7.07 – 7.01 (m, 3H), 6.96 (d,  $J = 6.7$  Hz, 1H), 6.92 (t,  $J = 7.4$  Hz, 1H), 6.59 (d,  $J = 7.8$  Hz, 1H), 6.55 (d,  $J = 8.3$  Hz, 2H), 3.09 (d,  $J = 23.8$  Hz, 4H), 3.00 (d,  $J = 15.7$  Hz, 1H), 2.77 (d,  $J = 13.0$  Hz, 1H), 2.62 (d,  $J = 13.0$  Hz, 1H);  $^{13}\text{C}$  NMR (151 MHz,  $\text{CDCl}_3$ )  $\delta$  169.0, 146.2, 145.6, 134.1, 132.4, 131.9, 131.2, 128.7, 128.5, 128.1, 127.4, 124.5, 123.7, 123.3, 122.7, 120.7, 107.3, 46.1, 39.3, 33.5, 27.2. ESI-MS: Calcd for  $\text{C}_{23}\text{H}_{20}\text{ClN}_2$   $[\text{M}+\text{H}]^+$ : 359.1. Found: 359.1. HRMS (ESI $^+$ ): Calcd for  $\text{C}_{23}\text{H}_{20}\text{ClN}_2$ ,  $[\text{M}+\text{H}]^+$   $m/z$  359.1315. Found 359.1327.

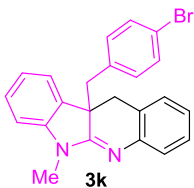

**3k:** Pale yellow solid, mp = 138 – 140 °C; Eluent: petroleum ether/EtOAc 10:1; <sup>1</sup>H NMR (600 MHz, CDCl<sub>3</sub>) δ 7.32 (d, *J* = 7.6 Hz, 1H), 7.28 (t, *J* = 7.5 Hz, 1H), 7.22 – 7.16 (m, 4H), 7.05 (t, *J* = 7.2 Hz, 1H), 6.96 (d, *J* = 7.0 Hz, 1H), 6.92 (t, *J* = 7.3 Hz, 1H), 6.59 (d, *J* = 7.8 Hz, 1H), 6.49 (d, *J* = 8.2 Hz, 2H), 3.11 (s, 3H), 3.07 (d, *J* = 15.7 Hz, 1H), 2.99 (d, *J* = 15.7 Hz, 1H), 2.75 (d, *J* = 13.0 Hz, 1H), 2.60 (d, *J* = 13.0 Hz, 1H); <sup>13</sup>C NMR (151 MHz, CDCl<sub>3</sub>) δ 169.0, 146.2, 145.7, 134.7, 131.9, 131.6, 130.4, 128.7, 128.5, 128.1, 124.5, 123.7, 123.3, 122.7, 120.7, 120.6, 107.3, 46.1, 39.4, 33.5, 27.2. ESI-MS: Calcd for C<sub>23</sub>H<sub>20</sub>BrN<sub>2</sub> [M+H]<sup>+</sup>: 403.1. Found: 403.1. HRMS (ESI<sup>+</sup>): Calcd for C<sub>23</sub>H<sub>20</sub>BrN<sub>2</sub>, [M+H]<sup>+</sup> *m/z* 403.0810. Found 403.0817.

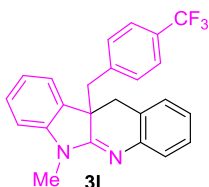

**3l:** Light yellow oil; Eluent: petroleum ether/EtOAc 10:1; <sup>1</sup>H NMR (600 MHz, CDCl<sub>3</sub>) δ 7.35 – 7.27 (m, 4H), 7.23 – 7.18 (m, 2H), 7.06 (t, *J* = 7.3 Hz, 1H), 6.98 (d, *J* = 7.1 Hz, 1H), 6.94 (t, *J* = 7.2 Hz, 1H), 6.72 (d, *J* = 7.8 Hz, 2H), 6.56 (d, *J* = 7.8 Hz, 1H), 3.09 (d, *J* = 15.6 Hz, 1H), 3.07 (s, 3H), 3.01 (d, *J* = 15.7 Hz, 1H), 2.87 (d, *J* = 12.9 Hz, 1H), 2.69 (d, *J* = 12.9 Hz, 1H); <sup>13</sup>C NMR (151 MHz, CDCl<sub>3</sub>) δ 168.7, 146.2, 145.6, 139.8, 131.7, 130.2, 128.7, 128.7 (d, *J* = 32.4 Hz), 128.6, 128.2, 124.6, 124.2 (q, *J* = 272.0 Hz), 124.1 (q, *J* = 3.7 Hz), 123.8, 123.3, 122.7, 120.8, 107.4, 46.2, 39.8, 33.6, 27.1. ESI-MS: Calcd for C<sub>24</sub>H<sub>20</sub>F<sub>3</sub>N<sub>2</sub> [M+H]<sup>+</sup>: 393.2. Found: 393.1. HRMS (ESI<sup>+</sup>): Calcd for C<sub>24</sub>H<sub>20</sub>F<sub>3</sub>N<sub>2</sub>, [M+H]<sup>+</sup> *m/z* 393.1579. Found 393.1596.

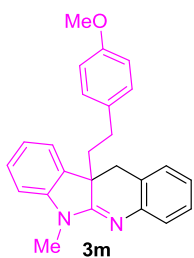

**3m:** Light yellow oil; Eluent: petroleum ether/EtOAc 10:1; <sup>1</sup>H NMR (600 MHz, CDCl<sub>3</sub>) δ 7.28 (t, *J* = 7.7 Hz, 1H), 7.26 – 7.18 (m, 3H), 7.09 (d, *J* = 7.2 Hz, 1H), 7.01 (t, *J* = 7.5 Hz, 1H), 6.96 (t, *J* =

7.2 Hz, 1H), 6.82 (d,  $J = 7.8$  Hz, 1H), 6.77 (d,  $J = 7.7$  Hz, 2H), 6.68 – 6.61 (m, 2H), 3.66 (s, 3H), 3.35 (s, 3H), 3.12 – 2.99 (m, 2H), 2.34 – 2.24 (m, 1H), 2.17 – 2.08 (m, 1H), 2.04 – 1.94 (m, 1H), 1.72 – 1.63 (m, 1H);  $^{13}\text{C}$  NMR (151 MHz,  $\text{CDCl}_3$ )  $\delta$  169.8, 157.6, 146.5, 145.4, 133.1, 133.0, 129.0, 128.5, 128.3, 127.9, 124.0, 123.5, 122.7, 122.6, 121.3, 113.5, 107.5, 55.1, 45.0, 36.7, 34.5, 29.2, 27.6. ESI-MS: Calcd for  $\text{C}_{25}\text{H}_{25}\text{N}_2\text{O}$   $[\text{M}+\text{H}]^+$ : 369.2. Found: 369.1. HRMS (ESI $^+$ ): Calcd for  $\text{C}_{25}\text{H}_{25}\text{N}_2\text{O}$ ,  $[\text{M}+\text{H}]^+$   $m/z$  369.1967. Found 369.1980.

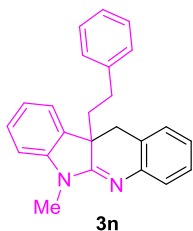

**3n**: Light yellow oil; Eluent: petroleum ether/EtOAc 10:1;  $^1\text{H}$  NMR (400 MHz,  $\text{CDCl}_3$ )  $\delta$  7.38 – 7.24 (m, 4H), 7.19 – 7.00 (m, 6H), 6.95 – 6.84 (m, 3H), 3.40 (s, 3H), 3.19 – 3.05 (m, 2H), 2.42 (td,  $J = 12.8, 5.1$  Hz, 1H), 2.26 (td,  $J = 12.7, 4.5$  Hz, 1H), 2.10 (td,  $J = 12.7, 12.3, 5.2$  Hz, 1H), 1.77 (td,  $J = 12.7, 4.5$  Hz, 1H);  $^{13}\text{C}$  NMR (101 MHz,  $\text{CDCl}_3$ )  $\delta$  169.9, 146.7, 145.8, 141.2, 133.2, 128.6, 128.4, 128.2, 128.2, 128.0, 125.9, 124.3, 123.6, 122.8, 122.7, 121.3, 107.6, 45.0, 36.6, 34.7, 30.3, 27.7. ESI-MS: Calcd for  $\text{C}_{24}\text{H}_{23}\text{N}_2$   $[\text{M}+\text{H}]^+$ : 339.2. Found: 339.0. HRMS (ESI $^+$ ): Calcd for  $\text{C}_{24}\text{H}_{23}\text{N}_2$ ,  $[\text{M}+\text{H}]^+$   $m/z$  339.1861. Found 339.1872.

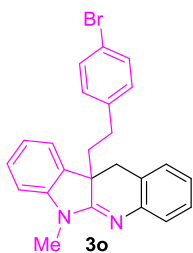

**3o**: Light yellow oil; Eluent: petroleum ether/EtOAc 10:1;  $^1\text{H}$  NMR (600 MHz,  $\text{CDCl}_3$ )  $\delta$  7.29 (t,  $J = 7.7$  Hz, 1H), 7.27 – 7.18 (m, 5H), 7.10 (d,  $J = 7.2$  Hz, 1H), 7.01 (t,  $J = 7.4$  Hz, 1H), 6.97 (t,  $J = 7.2$  Hz, 1H), 6.83 (d,  $J = 7.8$  Hz, 1H), 6.69 (d,  $J = 8.4$  Hz, 2H), 3.35 (s, 3H), 3.09 – 3.01 (m, 2H), 2.28 (td,  $J = 12.8, 5.2$  Hz, 1H), 2.12 (td,  $J = 13.2, 12.8, 4.4$  Hz, 1H), 2.01 (td,  $J = 12.7, 5.2$  Hz, 1H), 1.66 (td,  $J = 12.7, 4.4$  Hz, 1H);  $^{13}\text{C}$  NMR (151 MHz,  $\text{CDCl}_3$ )  $\delta$  169.5, 146.4, 145.2, 139.9, 132.7, 131.1, 129.8, 128.5, 128.0, 124.0, 123.6, 122.6, 122.5, 121.4, 119.4, 107.6, 44.9, 36.2, 34.6, 29.6, 27.7. ESI-MS: Calcd for  $\text{C}_{24}\text{H}_{22}\text{BrN}_2$   $[\text{M}+\text{H}]^+$ : 417.1. Found: 417.1. HRMS (ESI $^+$ ): Calcd for  $\text{C}_{24}\text{H}_{22}\text{BrN}_2$ ,  $[\text{M}+\text{H}]^+$   $m/z$  417.0966. Found 417.0981.

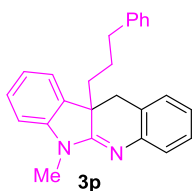

**3p:** Light yellow oil; Eluent: petroleum ether/EtOAc 10:1;  $^1\text{H}$  NMR (600 MHz,  $\text{CDCl}_3$ )  $\delta$  7.26 – 7.19 (m, 3H), 7.17 – 7.12 (m, 3H), 7.11 – 7.06 (m, 2H), 7.00 – 6.90 (m, 4H), 6.77 (d,  $J = 7.8$  Hz, 1H), 3.32 (s, 3H), 3.03 (d,  $J = 15.5$  Hz, 1H), 2.98 (d,  $J = 15.5$  Hz, 1H), 2.40 – 2.30 (m, 1H), 2.29 – 2.20 (m, 1H), 1.74 (td,  $J = 12.6, 4.2$  Hz, 1H), 1.49 (td,  $J = 12.6, 3.9$  Hz, 1H), 1.45 – 1.36 (m, 1H), 1.30 – 1.17 (m, 1H);  $^{13}\text{C}$  NMR (151 MHz,  $\text{CDCl}_3$ )  $\delta$  170.4, 146.6, 145.8, 141.9, 133.5, 128.6, 128.3, 128.2, 127.9, 125.7, 124.3, 123.5, 123.0, 122.7, 121.2, 107.5, 44.9, 35.7, 34.5, 34.5, 27.7, 25.6. ESI-MS: Calcd for  $\text{C}_{25}\text{H}_{25}\text{N}_2$   $[\text{M}+\text{H}]^+$ : 353.2. Found: 353.1. HRMS (ESI $^+$ ): Calcd for  $\text{C}_{25}\text{H}_{25}\text{N}_2$ ,  $[\text{M}+\text{H}]^+$   $m/z$  353.2018. Found 353.2039.

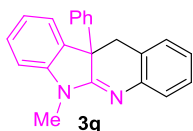

**3q:** Light yellow oil; Eluent: petroleum ether/EtOAc 10:1;  $^1\text{H}$  NMR (400 MHz,  $\text{CDCl}_3$ )  $\delta$  7.33 – 7.28 (m, 3H), 7.22 – 7.17 (m, 1H), 7.15 (dd,  $J = 7.8, 1.1$  Hz, 1H), 7.12 – 7.07 (m, 3H), 7.05 – 6.99 (m, 2H), 6.90 (td,  $J = 7.5, 0.8$  Hz, 1H), 6.85 (td,  $J = 7.3, 1.3$  Hz, 1H), 6.79 (d,  $J = 7.8$  Hz, 1H), 3.65 (d,  $J = 15.6$  Hz, 1H), 3.46 (s, 3H), 3.24 (d,  $J = 15.5$  Hz, 1H);  $^{13}\text{C}$  NMR (101 MHz,  $\text{CDCl}_3$ )  $\delta$  168.8, 146.1, 146.0, 139.7, 134.9, 128.6, 128.4, 128.2, 127.9, 127.1, 125.7, 124.2, 123.7, 123.3, 123.0, 121.5, 107.9, 49.4, 35.9, 28.0. ESI-MS: Calcd for  $\text{C}_{22}\text{H}_{19}\text{N}_2$   $[\text{M}+\text{H}]^+$ : 311.2. Found: 311.0. HRMS (ESI $^+$ ): Calcd for  $\text{C}_{22}\text{H}_{19}\text{N}_2$ ,  $[\text{M}+\text{H}]^+$   $m/z$  311.1548. Found 311.1542.

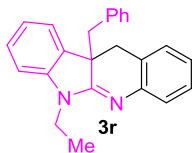

**3r:** Light yellow oil; Eluent: petroleum ether/EtOAc 10:1;  $^1\text{H}$  NMR (400 MHz, Chloroform- $d$ )  $\delta$  7.37 – 7.24 (m, 2H), 7.23 – 7.14 (m, 2H), 7.13 – 6.96 (m, 5H), 6.91 (t,  $J = 7.4$  Hz, 1H), 6.64 – 6.50 (m, 3H), 3.92 – 3.73 (m, 1H), 3.58 – 3.41 (m, 1H), 3.11 (d,  $J = 15.6$  Hz, 1H), 3.00 (d,  $J = 15.7$  Hz, 1H), 2.84 (d,  $J = 12.8$  Hz, 1H), 2.65 (d,  $J = 12.9$  Hz, 1H), 0.96 (t,  $J = 7.2$  Hz, 3H);  $^{13}\text{C}$  NMR (101 MHz,  $\text{CDCl}_3$ )  $\delta$  168.5, 146.2, 145.6, 135.8, 132.6, 130.1, 128.8, 128.3, 128.1, 127.4, 126.5, 124.5, 123.6, 123.5, 123.0, 120.5, 107.4, 46.2, 40.1, 35.3, 33.9, 12.7. ESI-MS: Calcd for

$C_{24}H_{23}N_2$   $[M+H]^+$ : 339.2. Found: 339.1. HRMS (ESI<sup>+</sup>): Calcd for  $C_{24}H_{23}N_2$ ,  $[M+H]^+$   $m/z$  339.1861. Found 339.1869.

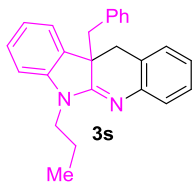

**3s:** Light yellow oil; Eluent: petroleum ether/EtOAc 10:1; <sup>1</sup>H NMR (400 MHz, CDCl<sub>3</sub>) δ 7.32 (d,  $J$  = 6.9 Hz, 1H), 7.27 (t,  $J$  = 7.5 Hz, 1H), 7.22 – 7.13 (m, 2H), 7.12 – 7.01 (m, 4H), 6.98 (d,  $J$  = 6.7 Hz, 1H), 6.90 (t,  $J$  = 7.4 Hz, 1H), 6.65 – 6.53 (m, 3H), 3.79 (dt,  $J$  = 14.4, 7.1 Hz, 1H), 3.35 (dt,  $J$  = 14.3, 7.6 Hz, 1H), 3.09 (d,  $J$  = 15.7 Hz, 1H), 2.98 (d,  $J$  = 15.6 Hz, 1H), 2.82 (d,  $J$  = 12.8 Hz, 1H), 2.66 (d,  $J$  = 12.8 Hz, 1H), 1.45 (sext,  $J$  = 7.3 Hz, 2H), 0.80 (t,  $J$  = 7.4 Hz, 3H); <sup>13</sup>C NMR (101 MHz, CDCl<sub>3</sub>) δ 168.9, 146.2, 135.8, 132.5, 130.1, 128.8, 128.3, 128.0, 127.5, 126.5, 124.6, 123.6, 123.5, 123.0, 120.4, 107.5, 46.1, 42.5, 40.1, 33.9, 20.5, 11.6. ESI-MS: Calcd for  $C_{25}H_{25}N_2$   $[M+H]^+$ : 353.2. Found: 353.1. HRMS (ESI<sup>+</sup>): Calcd for  $C_{25}H_{25}N_2$ ,  $[M+H]^+$   $m/z$  353.2018. Found 353.2033.

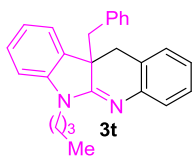

**3t:** Pale yellow solid, mp = 65-67 °C; Eluent: petroleum ether/EtOAc 10:1; <sup>1</sup>H NMR (600 MHz, CDCl<sub>3</sub>) δ 7.34 – 7.26 (m, 2H), 7.24 – 7.18 (m, 2H), 7.13 – 7.09 (m, 1H), 7.08 – 7.02 (m, 3H), 7.00 (d,  $J$  = 7.2 Hz, 1H), 6.93 (t,  $J$  = 7.3 Hz, 1H), 6.66 – 6.57 (m, 3H), 3.82 (dt,  $J$  = 14.3, 7.4 Hz, 1H), 3.41 (dt,  $J$  = 14.5, 7.5 Hz, 1H), 3.12 (d,  $J$  = 15.6 Hz, 1H), 3.01 (d,  $J$  = 15.6 Hz, 1H), 2.83 (d,  $J$  = 12.9 Hz, 1H), 2.68 (d,  $J$  = 13.0 Hz, 1H), 1.40 (quint,  $J$  = 7.5 Hz, 2H), 1.30 – 1.22 (m, 1H), 1.21 – 1.13 (m, 1H), 0.89 (t,  $J$  = 7.2 Hz, 3H); <sup>13</sup>C NMR (151 MHz, CDCl<sub>3</sub>) δ 168.8, 146.2, 146.2, 135.8, 132.5, 130.1, 128.8, 128.3, 128.0, 127.5, 126.5, 124.6, 123.6, 123.5, 123.0, 120.4, 107.5, 46.1, 40.7, 40.1, 34.0, 29.3, 20.3, 14.0. ESI-MS: Calcd for  $C_{26}H_{27}N_2$   $[M+H]^+$ : 367.2. Found: 367.1. HRMS (ESI<sup>+</sup>): Calcd for  $C_{26}H_{27}N_2$ ,  $[M+H]^+$   $m/z$  367.2174. Found 367.2187.

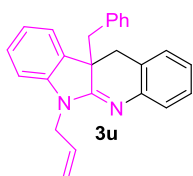

**3u**: Pale yellow solid, mp = 71-73 °C; Eluent: petroleum ether/EtOAc 10:1; <sup>1</sup>H NMR (600 MHz, CDCl<sub>3</sub>) δ 7.32 (d, *J* = 7.2 Hz, 1H), 7.29 (t, *J* = 7.4 Hz, 1H), 7.23 (d, *J* = 6.8 Hz, 1H), 7.18 (t, *J* = 7.5 Hz, 1H), 7.12 (t, *J* = 7.2 Hz, 1H), 7.09 – 7.05 (m, 3H), 7.03 (d, *J* = 6.9 Hz, 1H), 6.95 (t, *J* = 7.4 Hz, 1H), 6.63 (d, *J* = 7.2 Hz, 2H), 6.60 (d, *J* = 7.8 Hz, 1H), 5.60 – 5.46 (m, 1H), 5.09 – 4.96 (m, 1H), 4.90 – 4.78 (m, 1H), 4.59 – 4.49 (m, 1H), 4.04 (dd, *J* = 16.6, 5.5 Hz, 1H), 3.15 (d, *J* = 15.7 Hz, 1H), 3.03 (d, *J* = 15.6 Hz, 1H), 2.87 (d, *J* = 12.9 Hz, 1H), 2.70 (d, *J* = 13.0 Hz, 1H); <sup>13</sup>C NMR (101 MHz, CDCl<sub>3</sub>) δ 168.7, 145.9, 145.9, 135.8, 132.4, 131.9, 130.2, 128.8, 128.3, 128.1, 127.6, 126.6, 124.6, 123.7, 123.5, 123.1, 120.7, 116.9, 108.4, 46.3, 43.4, 40.1, 34.1. ESI-MS: Calcd for C<sub>25</sub>H<sub>23</sub>N<sub>2</sub> [M+H]<sup>+</sup>: 351.2. Found: 351.0. HRMS (ESI<sup>+</sup>): Calcd for C<sub>25</sub>H<sub>23</sub>N<sub>2</sub>, [M+H]<sup>+</sup> *m/z* 351.1861. Found 351.1874.

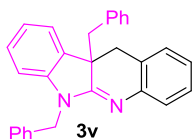

**3v**: Pale yellow solid, mp = 137-139 °C; Eluent: petroleum ether/EtOAc 10:1; <sup>1</sup>H NMR (400 MHz, CDCl<sub>3</sub>) δ 7.34 – 7.23 (m, 3H), 7.21 – 7.14 (m, 4H), 7.12 – 7.03 (m, 5H), 6.93 (t, *J* = 7.4 Hz, 1H), 6.89 – 6.82 (m, 2H), 6.66 (d, *J* = 7.5 Hz, 2H), 6.39 (d, *J* = 7.7 Hz, 1H), 5.19 (d, *J* = 16.2 Hz, 1H), 4.60 (d, *J* = 16.2 Hz, 1H), 3.17 (d, *J* = 15.7 Hz, 1H), 3.08 (d, *J* = 15.6 Hz, 1H), 2.94 (d, *J* = 12.9 Hz, 1H), 2.76 (d, *J* = 12.9 Hz, 1H); <sup>13</sup>C NMR (101 MHz, CDCl<sub>3</sub>) δ 169.2, 146.0, 136.3, 135.9, 132.5, 130.3, 128.9, 128.6, 128.4, 128.2, 127.8, 127.1, 127.0, 126.8, 124.7, 123.8, 123.5, 123.2, 121.0, 108.7, 46.4, 45.0, 40.1, 34.6. ESI-MS: Calcd for C<sub>29</sub>H<sub>25</sub>N<sub>2</sub> [M+H]<sup>+</sup>: 401.2. Found: 401.1. HRMS (ESI<sup>+</sup>): Calcd for C<sub>29</sub>H<sub>25</sub>N<sub>2</sub>, [M+H]<sup>+</sup> *m/z* 401.2018. Found 401.2025.

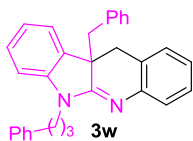

**3w**: Pale yellow solid, mp = 138-140 °C; Eluent: petroleum ether/EtOAc 10:1; <sup>1</sup>H NMR (600 MHz, CDCl<sub>3</sub>) δ 6.47 (d, *J* = 7.7 Hz, 1H), 6.43 – 6.36 (m, 3H), 6.34 – 6.25 (m, 5H), 6.20 – 6.12 (m, 4H), 6.10 (d, *J* = 7.1 Hz, 1H), 6.03 (t, *J* = 7.3 Hz, 1H), 5.77 – 5.71 (m, 2H), 5.58 (d, *J* = 7.8 Hz, 1H), 2.98 (dt, *J* = 14.5, 7.5 Hz, 1H), 2.55 (dt, *J* = 14.5, 7.5 Hz, 1H), 2.22 (d, *J* = 15.6 Hz, 1H), 2.10 (d, *J* = 15.5 Hz, 1H), 1.95 (d, *J* = 12.9 Hz, 1H), 1.79 (d, *J* = 13.0 Hz, 1H), 1.72 – 1.59 (m, 2H), 0.88 (p, *J* = 7.6 Hz, 2H); <sup>13</sup>C NMR (151 MHz, CDCl<sub>3</sub>) δ 168.7, 146.1, 145.9, 141.4, 135.7, 132.4,

130.0, 128.7, 128.4, 128.3, 128.2, 128.0, 127.4, 126.5, 125.9, 124.5, 123.5, 123.5, 122.9, 120.4, 107.4, 46.0, 40.3, 40.0, 33.9, 32.9, 28.1. ESI-MS: Calcd for C<sub>31</sub>H<sub>29</sub>N<sub>2</sub> [M+H]<sup>+</sup>: 429.2. Found: 429.1. HRMS (ESI<sup>+</sup>): Calcd for C<sub>31</sub>H<sub>29</sub>N<sub>2</sub>, [M+H]<sup>+</sup> *m/z* 429.2331. Found 429.2342.

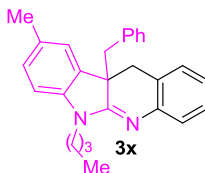

**3x**: Pale yellow solid, mp = 124-125 °C; Eluent: petroleum ether/EtOAc 10:1; <sup>1</sup>H NMR (600 MHz, CDCl<sub>3</sub>) δ 7.31 (d, *J* = 7.5 Hz, 1H), 7.26 (t, *J* = 7.5 Hz, 1H), 7.19 (d, *J* = 7.2 Hz, 1H), 7.12 – 7.00 (m, 4H), 6.98 (d, *J* = 7.6 Hz, 1H), 6.80 (s, 1H), 6.62 (d, *J* = 7.2 Hz, 2H), 6.48 (d, *J* = 7.8 Hz, 1H), 3.79 (dt, *J* = 14.4, 7.2 Hz, 1H), 3.38 (dt, *J* = 14.4, 7.5 Hz, 1H), 3.08 (d, *J* = 15.6 Hz, 1H), 2.97 (d, *J* = 15.5 Hz, 1H), 2.80 (d, *J* = 13.0 Hz, 1H), 2.66 (d, *J* = 13.0 Hz, 1H), 2.31 (s, 3H), 1.46 – 1.31 (m, 2H), 1.26 – 1.11 (m, 2H), 0.87 (t, *J* = 7.4 Hz, 3H); <sup>13</sup>C NMR (151 MHz, CDCl<sub>3</sub>) δ 169.0, 146.4, 143.9, 135.9, 132.7, 130.2, 129.8, 128.8, 128.4, 128.0, 127.4, 126.5, 124.5, 123.3, 123.1, 107.3, 46.2, 40.8, 40.1, 34.1, 29.4, 21.1, 20.4, 14.0. ESI-MS: Calcd for C<sub>27</sub>H<sub>29</sub>N<sub>2</sub> [M+H]<sup>+</sup>: 381.2. Found: 381.0. HRMS (ESI<sup>+</sup>): Calcd for C<sub>27</sub>H<sub>29</sub>N<sub>2</sub>, [M+H]<sup>+</sup> *m/z* 381.2331. Found 381.2344.

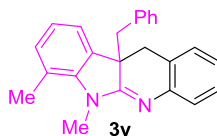

**3y**: Pale yellow solid, mp = 124-125 °C; Eluent: petroleum ether/EtOAc 10:1; <sup>1</sup>H NMR (800 MHz, CDCl<sub>3</sub>) δ 7.34 (d, *J* = 7.7 Hz, 1H), 7.28 (t, *J* = 7.5 Hz, 1H), 7.21 (d, *J* = 7.3 Hz, 1H), 7.11 (t, *J* = 7.3 Hz, 1H), 7.09 – 7.01 (m, 3H), 6.92 (d, *J* = 7.6 Hz, 1H), 6.81 (t, *J* = 7.4 Hz, 1H), 6.76 (d, *J* = 7.1 Hz, 1H), 6.60 (d, *J* = 7.2 Hz, 2H), 3.40 (s, 3H), 3.10 (d, *J* = 15.6 Hz, 1H), 2.96 (d, *J* = 15.5 Hz, 1H), 2.75 (d, *J* = 13.0 Hz, 1H), 2.64 (d, *J* = 13.0 Hz, 1H), 2.38 (s, 3H); <sup>13</sup>C NMR (201 MHz, CDCl<sub>3</sub>) δ 170.3, 144.0, 135.6, 133.0, 132.0, 130.0, 128.7, 128.0, 127.2, 126.5, 124.3, 123.5, 123.0, 121.4, 120.7, 119.1, 45.8, 40.3, 33.4, 30.6, 19.1. ESI-MS: Calcd for C<sub>24</sub>H<sub>23</sub>N<sub>2</sub> [M+H]<sup>+</sup>: 339.2. Found: 339.0. HRMS (ESI<sup>+</sup>): Calcd for C<sub>24</sub>H<sub>23</sub>N<sub>2</sub>, [M+H]<sup>+</sup> *m/z* 339.1861. Found 339.1872.

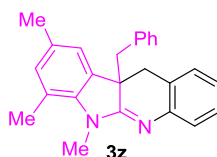



**3z:** Pale yellow solid, mp = 154-156 °C; Eluent: petroleum ether/EtOAc 10:1; <sup>1</sup>H NMR (600 MHz, CDCl<sub>3</sub>) δ 7.31 (d, *J* = 7.7 Hz, 1H), 7.27 (t, *J* = 7.5 Hz, 1H), 7.20 (d, *J* = 7.2 Hz, 1H), 7.14 – 7.05 (m, 3H), 7.03 (t, *J* = 7.3 Hz, 1H), 6.72 (s, 1H), 6.59 (d, *J* = 7.7 Hz, 2H), 6.55 (s, 1H), 3.36 (s, 3H), 3.07 (d, *J* = 15.6 Hz, 1H), 2.93 (d, *J* = 15.6 Hz, 1H), 2.72 (d, *J* = 12.8 Hz, 1H), 2.63 (d, *J* = 12.9 Hz, 1H), 2.34 (s, 3H), 2.24 (s, 3H); <sup>13</sup>C NMR (151 MHz, CDCl<sub>3</sub>) δ 170.4, 146.2, 141.7, 135.7, 133.1, 132.2, 130.1, 129.9, 128.7, 127.9, 127.1, 126.4, 124.3, 123.2, 123.1, 122.2, 118.6, 45.7, 40.2, 33.5, 30.4, 20.7, 18.9. ESI-MS: Calcd for C<sub>25</sub>H<sub>25</sub>N<sub>2</sub> [M+H]<sup>+</sup>: 353.2. Found: 353.0. HRMS (ESI<sup>+</sup>): Calcd for C<sub>25</sub>H<sub>25</sub>N<sub>2</sub>, [M+H]<sup>+</sup> *m/z* 353.2018. Found 353.2032.

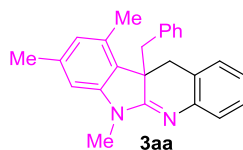

**3aa:** Light yellow oil; Eluent: petroleum ether/EtOAc 10:1; <sup>1</sup>H NMR (600 MHz, CDCl<sub>3</sub>) δ 7.33 (d, *J* = 7.7 Hz, 1H), 7.27 (t, *J* = 7.5 Hz, 1H), 7.20 (d, *J* = 7.2 Hz, 1H), 7.06 – 6.96 (m, 4H), 6.59 (d, *J* = 7.3 Hz, 2H), 6.53 (s, 1H), 6.12 (s, 1H), 3.35 (d, *J* = 15.6 Hz, 1H), 3.15 (d, *J* = 15.6 Hz, 1H), 2.95 (s, 3H), 2.89 (d, *J* = 12.9 Hz, 1H), 2.73 (d, *J* = 13.0 Hz, 1H), 2.24 (s, 3H), 2.23 (s, 3H); <sup>13</sup>C NMR (151 MHz, CDCl<sub>3</sub>) δ 168.7, 146.4, 145.4, 138.1, 136.0, 133.8, 129.4, 128.7, 127.9, 127.1, 126.2, 126.2, 124.1, 123.8, 123.3, 122.9, 105.7, 47.5, 38.1, 34.0, 26.8, 21.5, 18.2. ESI-MS: Calcd for C<sub>25</sub>H<sub>25</sub>N<sub>2</sub> [M+H]<sup>+</sup>: 353.2. Found: 353.0. HRMS (ESI<sup>+</sup>): Calcd for C<sub>25</sub>H<sub>25</sub>N<sub>2</sub>, [M+H]<sup>+</sup> *m/z* 353.2018. Found 353.2032.

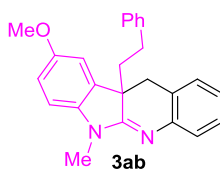

**3ab:** Light yellow oil; Eluent: petroleum ether/EtOAc 10:1; <sup>1</sup>H NMR (600 MHz, CDCl<sub>3</sub>) δ 7.24 – 7.17 (m, 2H), 7.12 – 7.06 (m, 3H), 7.03 (t, *J* = 7.3 Hz, 1H), 6.94 (td, *J* = 7.0, 1.6 Hz, 1H), 6.90 – 6.84 (m, 3H), 6.82 – 6.78 (m, 1H), 6.71 (d, *J* = 8.4 Hz, 1H), 3.79 (s, 3H), 3.31 (s, 3H), 3.03 (s, 2H), 2.35 (td, *J* = 12.8, 5.0 Hz, 1H), 2.18 (td, *J* = 12.8, 4.5 Hz, 1H), 2.06 (td, *J* = 12.8, 5.0 Hz, 1H), 1.69 (td, *J* = 12.9, 4.5 Hz, 1H); <sup>13</sup>C NMR (151 MHz, CDCl<sub>3</sub>) δ 169.7, 155.1, 145.8, 141.1, 140.3, 134.5, 128.4, 128.1, 127.8, 125.7, 124.0, 123.1, 122.6, 112.0, 110.6, 107.5, 55.8, 45.3, 36.5, 34.7, 30.1, 27.7. ESI-MS: Calcd for C<sub>25</sub>H<sub>25</sub>N<sub>2</sub>O [M+H]<sup>+</sup>: 369.2. Found: 369.1. HRMS (ESI<sup>+</sup>): Calcd for C<sub>25</sub>H<sub>25</sub>N<sub>2</sub>O, [M+H]<sup>+</sup> *m/z* 369.1967. Found 369.1974.

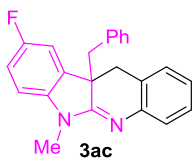

**3ac:** Pale yellow solid, mp = 144-145 °C; Eluent: petroleum ether/EtOAc 10:1; <sup>1</sup>H NMR (600 MHz, CDCl<sub>3</sub>) δ 7.35 – 7.26 (m, 2H), 7.24 – 7.19 (m, 1H), 7.16 – 7.04 (m, 4H), 6.89 (td, *J* = 8.8, 2.5 Hz, 1H), 6.72 – 6.63 (m, 3H), 6.50 – 6.44 (m, 1H), 3.09 (d, *J* = 15.5 Hz, 4H), 2.97 (d, *J* = 15.6 Hz, 1H), 2.77 (d, *J* = 13.0 Hz, 1H), 2.68 (d, *J* = 13.0 Hz, 1H); <sup>13</sup>C NMR (151 MHz, CDCl<sub>3</sub>) δ 169.2, 157.9 (d, *J* = 238.9 Hz), 145.5, 142.2, 135.2, 133.8 (d, *J* = 7.9 Hz), 130.0, 128.8, 128.1, 127.5, 126.7, 124.5, 123.7, 122.5, 114.3 (d, *J* = 23.7 Hz), 111.8 (d, *J* = 24.7 Hz), 107.3 (d, *J* = 8.1 Hz), 46.6, 39.8, 33.2, 27.3; <sup>19</sup>F NMR (565 MHz, CDCl<sub>3</sub>) δ -123.65. ESI-MS: Calcd for C<sub>23</sub>H<sub>20</sub>FN<sub>2</sub> [M+H]<sup>+</sup>: 343.2. Found: 343.0. HRMS (ESI<sup>+</sup>): Calcd for C<sub>23</sub>H<sub>20</sub>FN<sub>2</sub>, [M+H]<sup>+</sup> *m/z* 343.1611. Found 343.1622.

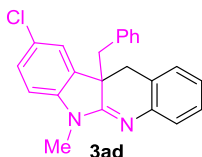

**3ad:** Pale yellow solid, mp = 172-174 °C; Eluent: petroleum ether/EtOAc 10:1; <sup>1</sup>H NMR (600 MHz, CDCl<sub>3</sub>) δ 7.34 – 7.28 (m, 2H), 7.25 – 7.21 (m, 1H), 7.18 – 7.07 (m, 5H), 6.89 (d, *J* = 2.0 Hz, 1H), 6.67 (d, *J* = 6.9 Hz, 2H), 6.49 (d, *J* = 8.3 Hz, 1H), 3.09 (d, *J* = 3.3 Hz, 4H), 2.98 (d, *J* = 15.7 Hz, 1H), 2.77 (d, *J* = 13.0 Hz, 1H), 2.68 (d, *J* = 13.0 Hz, 1H); <sup>13</sup>C NMR (151 MHz, CDCl<sub>3</sub>) δ 168.8, 145.4, 144.9, 135.1, 133.9, 130.0, 128.8, 128.2, 128.1, 127.5, 126.8, 125.6, 124.6, 124.1, 123.9, 122.6, 107.9, 46.5, 39.8, 33.2, 27.3. ESI-MS: Calcd for C<sub>23</sub>H<sub>20</sub>ClN<sub>2</sub> [M+H]<sup>+</sup>: 359.1. Found: 359.0. HRMS (ESI<sup>+</sup>): Calcd for C<sub>23</sub>H<sub>20</sub>ClN<sub>2</sub>, [M+H]<sup>+</sup> *m/z* 359.1315. Found 359.1327.

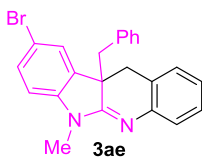

**3ae:** Pale yellow solid, mp = 209-211 °C; Eluent: petroleum ether/EtOAc 10:1; <sup>1</sup>H NMR (600 MHz, CDCl<sub>3</sub>) δ 7.34 – 7.28 (m, 3H), 7.23 (d, *J* = 7.3 Hz, 1H), 7.16 – 7.07 (m, 4H), 7.04 – 6.98 (m, 1H), 6.67 (d, *J* = 6.6 Hz, 2H), 6.45 (d, *J* = 8.3 Hz, 1H), 3.11 – 3.06 (m, 4H), 2.97 (d, *J* = 15.6 Hz, 1H), 2.76 (d, *J* = 13.0 Hz, 1H), 2.67 (d, *J* = 13.0 Hz, 1H); <sup>13</sup>C NMR (151 MHz, CDCl<sub>3</sub>) δ 168.6, 145.4, 135.1, 134.3, 131.0, 130.0, 128.8, 128.2, 127.5, 126.8, 126.8, 124.6, 124.0, 122.6, 112.8,

108.5, 46.4, 39.8, 33.1, 27.2. ESI-MS: Calcd for C<sub>23</sub>H<sub>20</sub>BrN<sub>2</sub> [M+H]<sup>+</sup>: 403.1. Found: 403.1.

HRMS (ESI<sup>+</sup>): Calcd for C<sub>23</sub>H<sub>20</sub>BrN<sub>2</sub>, [M+H]<sup>+</sup> *m/z* 403.0810. Found 403.0818.

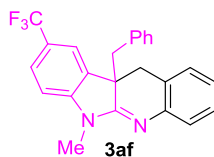

**3af:** Pale yellow solid, mp = 206-208 °C; Eluent: petroleum ether/EtOAc 10:1; <sup>1</sup>H NMR (800 MHz, CDCl<sub>3</sub>) δ 7.48 (d, *J* = 9.0 Hz, 1H), 7.34 (dd, *J* = 7.7, 1.1 Hz, 1H), 7.30 (t, *J* = 7.5 Hz, 1H), 7.27 – 7.22 (m, 1H), 7.16 – 7.06 (m, 5H), 6.66 – 6.58 (m, 3H), 3.19 – 3.09 (m, 4H), 2.99 (d, *J* = 15.5 Hz, 1H), 2.77 – 2.68 (m, 2H); <sup>13</sup>C NMR (201 MHz, CDCl<sub>3</sub>) δ 168.9, 149.2, 145.2, 135.0, 132.8, 130.0, 128.9, 128.2, 127.6, 126.9, 126.1 (q, *J* = 4.0 Hz), 124.8, 124.6 (q, *J* = 271.1 Hz), 124.3, 122.6, 122.5 (q, *J* = 32.5 Hz), 120.8 (q, *J* = 3.4 Hz), 106.6, 77.2, 77.1, 76.9, 46.1, 39.7, 33.0, 27.3; <sup>19</sup>F NMR (565 MHz, CDCl<sub>3</sub>) δ -62.36. ESI-MS: Calcd for C<sub>24</sub>H<sub>20</sub>F<sub>3</sub>N<sub>2</sub> [M+H]<sup>+</sup>: 393.2. Found: 393.1. HRMS (ESI<sup>+</sup>): Calcd for C<sub>24</sub>H<sub>20</sub>F<sub>3</sub>N<sub>2</sub>, [M+H]<sup>+</sup> *m/z* 393.1579. Found 393.1588.

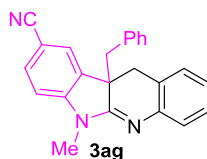

**3ag:** Pale yellow solid, mp = 246-247 °C; Eluent: petroleum ether/EtOAc 10:1; <sup>1</sup>H NMR (600 MHz, CDCl<sub>3</sub>) δ 7.56 – 7.50 (m, 1H), 7.37 – 7.30 (m, 2H), 7.28 – 7.24 (m, 1H), 7.18 – 7.09 (m, 5H), 6.63 (d, *J* = 7.2 Hz, 2H), 6.60 (d, *J* = 8.2 Hz, 1H), 3.16 (d, *J* = 15.8 Hz, 1H), 3.13 (s, 3H), 3.00 (d, *J* = 15.7 Hz, 1H), 2.79 (d, *J* = 13.1 Hz, 1H), 2.67 (d, *J* = 13.1 Hz, 1H); <sup>13</sup>C NMR (151 MHz, CDCl<sub>3</sub>) δ 168.2, 150.1, 144.7, 134.7, 133.9, 133.2, 129.8, 128.9, 128.3, 127.6, 127.0, 126.7, 125.0, 124.7, 122.5, 119.7, 107.4, 103.0, 46.0, 39.8, 33.0, 27.3. ESI-MS: Calcd for C<sub>24</sub>H<sub>20</sub>N<sub>3</sub> [M+H]<sup>+</sup>: 350.2. Found: 350.1. HRMS (ESI<sup>+</sup>): Calcd for C<sub>24</sub>H<sub>20</sub>N<sub>3</sub>, [M+H]<sup>+</sup> *m/z* 350.1657. Found 350.1669.

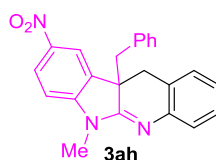

**3ah:** Light yellow oil; Eluent: petroleum ether/EtOAc 10:1; <sup>1</sup>H NMR (400 MHz, CDCl<sub>3</sub>) δ 8.20 (dd, *J* = 8.7, 2.2 Hz, 1H), 7.87 (d, *J* = 2.2 Hz, 1H), 7.38 – 7.26 (m, 3H), 7.19 – 7.04 (m, 4H), 6.63 (d, *J* = 7.1 Hz, 2H), 6.58 (d, *J* = 8.7 Hz, 1H), 3.22 (d, *J* = 15.7 Hz, 1H), 3.15 (s, 3H), 3.06 (d, *J* = 15.7 Hz, 1H), 2.87 (d, *J* = 13.0 Hz, 1H), 2.68 (d, *J* = 13.0 Hz, 1H); <sup>13</sup>C NMR (101 MHz, CDCl<sub>3</sub>) δ

168.3, 152.0, 144.5, 141.5, 134.6, 132.9, 129.7, 129.0, 128.4, 127.7, 127.1, 126.2, 125.1, 125.0, 122.5, 119.4, 106.2, 46.1, 39.9, 33.2, 27.4. ESI-MS: Calcd for C<sub>23</sub>H<sub>20</sub>N<sub>3</sub>O<sub>2</sub> [M+H]<sup>+</sup>: 370.2. Found: 370.0. HRMS (ESI<sup>+</sup>): Calcd for C<sub>23</sub>H<sub>20</sub>N<sub>3</sub>O<sub>2</sub>, [M+H]<sup>+</sup> *m/z* 370.1556. Found 370.1561.

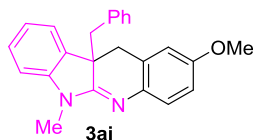

**3ai:** Light yellow oil; Eluent: petroleum ether/EtOAc 10:1; <sup>1</sup>H NMR (400 MHz, CDCl<sub>3</sub>) δ 7.26 (d, *J* = 8.4 Hz, 1H), 7.22 – 7.16 (m, 1H), 7.13 – 7.05 (m, 3H), 6.91 – 6.87 (m, 2H), 6.86 – 6.79 (m, 2H), 6.69 – 6.62 (m, 2H), 6.57 (d, *J* = 7.8 Hz, 1H), 3.83 (s, 3H), 3.08 (d, *J* = 14.2 Hz, 4H), 2.96 (d, *J* = 15.7 Hz, 1H), 2.77 (d, *J* = 12.8 Hz, 1H), 2.70 (d, *J* = 12.8 Hz, 1H); <sup>13</sup>C NMR (101 MHz, CDCl<sub>3</sub>) δ 168.3, 156.1, 146.5, 139.4, 135.8, 132.1, 130.2, 128.4, 127.4, 126.6, 125.1, 124.4, 123.7, 120.3, 115.2, 112.2, 107.1, 55.6, 46.2, 39.9, 33.8, 27.2. ESI-MS: Calcd for C<sub>24</sub>H<sub>23</sub>N<sub>2</sub>O [M+H]<sup>+</sup>: 355.2. Found: 355.0. HRMS (ESI<sup>+</sup>): Calcd for C<sub>24</sub>H<sub>23</sub>N<sub>2</sub>O, [M+H]<sup>+</sup> *m/z* 355.1810. Found 355.1818.

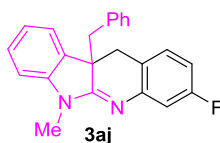

**3aj:** Pale yellow solid, mp = 118-120 °C; Eluent: petroleum ether/EtOAc 10:1; <sup>1</sup>H NMR (400 MHz, CDCl<sub>3</sub>) δ 7.24 – 7.17 (m, 1H), 7.16 – 7.01 (m, 5H), 6.93 (d, *J* = 4.3 Hz, 2H), 6.74 (td, *J* = 8.3, 2.6 Hz, 1H), 6.66 – 6.55 (m, 3H), 3.14 – 3.06 (m, 4H), 2.90 (d, *J* = 15.5 Hz, 1H), 2.76 (d, *J* = 12.9 Hz, 1H), 2.67 (d, *J* = 12.9 Hz, 1H); <sup>13</sup>C NMR (101 MHz, CDCl<sub>3</sub>) δ 170.4, 162.9 (d, *J* = 242.7 Hz), 147.7 (d, *J* = 11.3 Hz), 146.1, 135.5, 132.2, 130.1, 129.4 (d, *J* = 9.3 Hz), 128.5, 127.5, 126.7, 123.7, 121.0, 118.6 (d, *J* = 2.7 Hz), 111.4 (d, *J* = 22.7 Hz), 109.9 (d, *J* = 21.5 Hz), 107.5, 77.48, 77.2, 76.8, 46.6, 40.1, 32.7, 27.2; <sup>19</sup>F NMR (565 MHz, CDCl<sub>3</sub>) δ -115.16. ESI-MS: Calcd for C<sub>23</sub>H<sub>20</sub>FN<sub>2</sub> [M+H]<sup>+</sup>: 343.2. Found: 343.0. HRMS (ESI<sup>+</sup>): Calcd for C<sub>23</sub>H<sub>20</sub>FN<sub>2</sub>, [M+H]<sup>+</sup> *m/z* 343.1611. Found 343.1625.

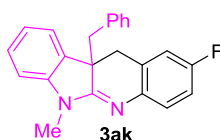

**3ak:** Light yellow oil; Eluent: petroleum ether/EtOAc 10:1; <sup>1</sup>H NMR (400 MHz, CDCl<sub>3</sub>) δ 7.26 (dd, *J* = 8.5, 5.4 Hz, 1H), 7.22 – 7.16 (m, 1H), 7.14 – 7.05 (m, 3H), 7.00 – 6.88 (m, 4H), 6.66 –

6.61 (m, 2H), 6.58 (d,  $J = 7.8$  Hz, 1H), 3.14 – 3.04 (m, 4H), 2.95 (d,  $J = 15.8$  Hz, 1H), 2.75 (d,  $J = 12.9$  Hz, 1H), 2.67 (d,  $J = 12.9$  Hz, 1H);  $^{13}\text{C}$  NMR (101 MHz,  $\text{CDCl}_3$ )  $\delta$  169.2, 159.3 (d,  $J = 241.7$  Hz), 146.3, 142.0 (d,  $J = 2.4$  Hz), 135.5, 131.9, 130.1, 128.5, 127.5, 126.7, 125.4 (d,  $J = 8.0$  Hz), 124.7 (d,  $J = 7.6$  Hz), 123.7, 120.7, 115.6 (d,  $J = 22.9$  Hz), 114.4 (d,  $J = 21.8$  Hz), 107.3, 77.5, 77.2, 76.8, 45.9, 40.0, 33.5, 27.2;  $^{19}\text{F}$  NMR (565 MHz,  $\text{CDCl}_3$ )  $\delta$  -119.4. ESI-MS: Calcd for  $\text{C}_{23}\text{H}_{20}\text{FN}_2$   $[\text{M}+\text{H}]^+$ : 343.2. Found: 343.0. HRMS (ESI $^+$ ): Calcd for  $\text{C}_{23}\text{H}_{20}\text{FN}_2$ ,  $[\text{M}+\text{H}]^+$   $m/z$  343.1611. Found 343.1636.

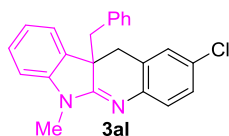

**3al**: Pale yellow solid, mp = 156-157 °C; Eluent: petroleum ether/EtOAc 10:1;  $^1\text{H}$  NMR (400 MHz,  $\text{CDCl}_3$ )  $\delta$  7.28 – 7.16 (m, 4H), 7.13 – 7.04 (m, 3H), 6.92 (d,  $J = 4.2$  Hz, 2H), 6.62 (d,  $J = 6.5$  Hz, 2H), 6.58 (d,  $J = 7.8$  Hz, 1H), 3.13 – 3.04 (m, 4H), 2.94 (d,  $J = 15.8$  Hz, 1H), 2.76 (d,  $J = 12.9$  Hz, 1H), 2.66 (d,  $J = 12.9$  Hz, 1H);  $^{13}\text{C}$  NMR (101 MHz,  $\text{CDCl}_3$ )  $\delta$  169.7, 146.2, 144.6, 135.4, 132.0, 130.1, 128.7, 128.5, 128.1, 128.0, 127.5, 126.7, 125.6, 124.8, 123.7, 120.9, 107.4, 46.2, 40.1, 33.3, 27.2. ESI-MS: Calcd for  $\text{C}_{23}\text{H}_{20}\text{ClN}_2$   $[\text{M}+\text{H}]^+$ : 359.1. Found: 359.1. HRMS (ESI $^+$ ): Calcd for  $\text{C}_{23}\text{H}_{20}\text{ClN}_2$ ,  $[\text{M}+\text{H}]^+$   $m/z$  359.1315. Found 359.1529.

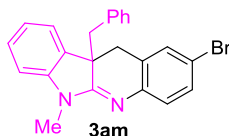

**3am**: Pale yellow solid, mp = 160-162 °C; Eluent: petroleum ether/EtOAc 10:1;  $^1\text{H}$  NMR (400 MHz,  $\text{CDCl}_3$ )  $\delta$  7.41 – 7.32 (m, 2H), 7.24 – 7.16 (m, 2H), 7.14 – 7.04 (m, 3H), 6.96 – 6.90 (m, 2H), 6.66 – 6.54 (m, 3H), 3.13 – 3.06 (m, 4H), 2.97 (d,  $J = 15.8$  Hz, 1H), 2.77 (d,  $J = 12.9$  Hz, 1H), 2.66 (d,  $J = 12.9$  Hz, 1H);  $^{13}\text{C}$  NMR (101 MHz,  $\text{CDCl}_3$ )  $\delta$  169.8, 146.2, 145.1, 135.4, 132.0, 131.5, 131.0, 130.0, 128.6, 127.5, 126.7, 126.1, 125.3, 123.7, 120.9, 115.8, 107.5, 46.2, 40.2, 33.3, 27.3. ESI-MS: Calcd for  $\text{C}_{23}\text{H}_{20}\text{BrN}_2$   $[\text{M}+\text{H}]^+$ : 403.1. Found: 403.1. HRMS (ESI $^+$ ): Calcd for  $\text{C}_{23}\text{H}_{20}\text{BrN}_2$ ,  $[\text{M}+\text{H}]^+$   $m/z$  403.0810. Found 403.0821.

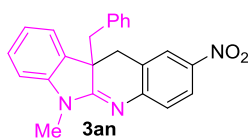

**3an:** Pale yellow solid, mp = 224-226 °C; Eluent: petroleum ether/EtOAc 10:1; <sup>1</sup>H NMR (400 MHz, CDCl<sub>3</sub>) δ 8.24 – 8.08 (m, 2H), 7.34 (d, *J* = 8.4 Hz, 1H), 7.30 – 7.22 (m, 1H), 7.16 – 7.00 (m, 5H), 6.66 (d, *J* = 7.8 Hz, 1H), 6.60 (d, *J* = 6.9 Hz, 2H), 3.28 (d, *J* = 16.0 Hz, 1H), 3.15 (s, 3H), 3.03 (d, *J* = 16.0 Hz, 1H), 2.79 (d, *J* = 13.0 Hz, 1H), 2.69 (d, *J* = 13.0 Hz, 1H); <sup>13</sup>C NMR (101 MHz, CDCl<sub>3</sub>) δ 172.1, 152.8, 145.5, 143.1, 134.8, 131.9, 129.9, 128.8, 127.6, 127.0, 124.6, 124.5, 124.3, 123.8, 123.5, 122.0, 108.1, 46.5, 40.6, 33.2, 27.4. ESI-MS: Calcd for C<sub>23</sub>H<sub>20</sub>N<sub>3</sub>O<sub>2</sub> [M+H]<sup>+</sup>: 370.2. Found: 370.1. HRMS (ESI<sup>+</sup>): Calcd for C<sub>23</sub>H<sub>20</sub>N<sub>3</sub>O<sub>2</sub>, [M+H]<sup>+</sup> *m/z* 370.1556. Found 370.1563.

### 3.3. Procedure for preparation of compound 4.

To a dried Schlenk tube were added **1h** (0.3 mmol, 1.0 equiv), **2a** (0.3 mmol, 1.0 equiv) and K<sub>2</sub>CO<sub>3</sub> (0.9 mmol, 3.0 equiv) under N<sub>2</sub>, 3.0 mL of <sup>t</sup>BuOH was then introduced via syringe. The mixture was stirred at room temperature for 12 h. The solvent was then removed under vacuum, and the residue was purified by column chromatography on silica to give the desired product **4** as a light yellow oil.

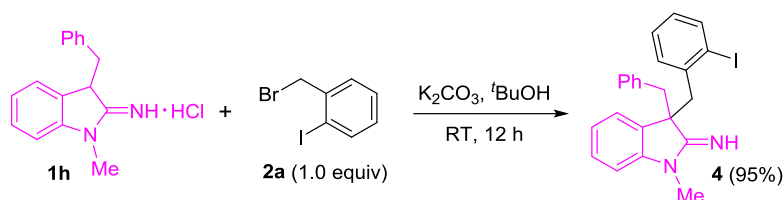

**4:** Eluent: CH<sub>2</sub>Cl<sub>2</sub>/MeOH 15:1; <sup>1</sup>H NMR (400 MHz, CDCl<sub>3</sub>) δ 7.70 (d, *J* = 8.0 Hz, 1H), 7.09 – 6.99 (m, 6H), 6.98 – 6.91 (m, 1H), 6.88 – 6.78 (m, 3H), 6.78 – 6.71 (m, 1H), 6.37 (d, *J* = 7.7 Hz, 1H), 3.49 (d, *J* = 14.5 Hz, 1H), 3.40 (d, *J* = 14.4 Hz, 1H), 3.24 – 3.11 (m, 2H), 2.91 (s, 3H); <sup>13</sup>C NMR (101 MHz, CDCl<sub>3</sub>) δ 172.6, 145.4, 139.5, 139.4, 135.3, 130.2, 130.1, 129.7, 128.3, 128.0, 127.7, 127.4, 126.4, 124.4, 120.0, 106.4, 103.6, 55.3 47.6 45.7, 26.7. ESI-MS: Calcd for C<sub>23</sub>H<sub>22</sub>IN<sub>2</sub> [M+H]<sup>+</sup>: 453.1. Found: 453.1. HRMS (ESI<sup>+</sup>): Calcd for C<sub>23</sub>H<sub>22</sub>IN<sub>2</sub>, [M+H]<sup>+</sup> *m/z* 453.0828. Found 453.0834.

### 3.4 Procedure for the reductions using DIBAL-H.

#### (1) General Procedures

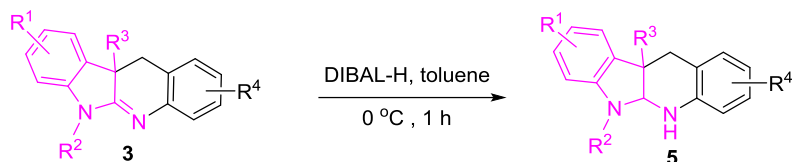

To a solution of **3** (0.2 mmol, 1.0 eq) in 2 mL of anhydrous toluene under Argon atmosphere was added DIBAL-H (1.5 M in toluene, 0.6 mmol, 0.4 mL, 3 equiv) at 0 °C, then the reaction mixture was stirred for 1h. TLC showed the reaction completed. The resulting mixture was extracted with ethyl acetate (2 mL x 2) and water, and the combined organic phase was washed with brine (2 mL), dried over anhydrous Na<sub>2</sub>SO<sub>4</sub>, concentrated and purified by column chromatography on silica to give the desired product **5**.

## (2) Characterizaion Data of compound 5a-f.

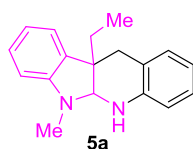

**5a**: Light yellow oil; Eluent: petroleum ether/EtOAc 15:1; <sup>1</sup>H NMR (600 MHz, CDCl<sub>3</sub>) δ 7.11 – 7.04 (m, 2H), 7.01 (t, *J* = 7.5 Hz, 1H), 6.94 (d, *J* = 7.3 Hz, 1H), 6.72 (t, *J* = 7.2 Hz, 1H), 6.65 (t, *J* = 7.2 Hz, 1H), 6.59 (d, *J* = 8.0 Hz, 1H), 6.45 (d, *J* = 7.7 Hz, 1H), 4.56 (br, 1H), 4.35 (s, 1H), 2.83 (d, *J* = 15.1 Hz, 1H), 2.77 (s, 3H), 2.58 (d, *J* = 15.1 Hz, 1H), 1.78 – 1.69 (m, 1H), 1.65 – 1.57 (m, 1H), 0.86 (t, *J* = 7.5 Hz, 3H); <sup>13</sup>C NMR (151 MHz, CDCl<sub>3</sub>) δ 149.9, 141.7, 134.7, 128.8, 127.6, 126.87, 122.4, 122.0, 118.2, 113.6, 107.4, 80.1, 44.6, 37.3, 31.9, 27.6, 9.1. ESI-MS: Calcd for C<sub>18</sub>H<sub>21</sub>N<sub>2</sub> [M+H]<sup>+</sup>: 265.2. Found: 265.0. HRMS (ESI<sup>+</sup>): Calcd for C<sub>18</sub>H<sub>21</sub>N<sub>2</sub>, [M+H]<sup>+</sup> *m/z* 265.1705. Found 265.1713.

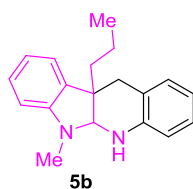

**5b**: Light yellow oil; Eluent: petroleum ether/EtOAc 15:1; <sup>1</sup>H NMR (600 MHz, CDCl<sub>3</sub>) δ 7.11 – 7.04 (m, 2H), 7.01 (t, *J* = 7.5 Hz, 1H), 6.94 (d, *J* = 7.3 Hz, 1H), 6.72 (t, *J* = 7.3 Hz, 1H), 6.65 (t, *J* = 7.3 Hz, 1H), 6.59 (d, *J* = 7.9 Hz, 1H), 6.44 (d, *J* = 7.7 Hz, 1H), 4.55 (br, 1H), 4.34 (s, 1H), 2.82 (d, *J* = 15.1 Hz, 1H), 2.75 (s, 3H), 2.57 (d, *J* = 15.2 Hz, 1H), 1.67 – 1.61 (m, 1H), 1.58 – 1.52 (m,

1H), 1.32 – 1.24 (m, 2H), 0.84 (t,  $J = 7.3$  Hz, 3H);  $^{13}\text{C}$  NMR (151 MHz,  $\text{CDCl}_3$ )  $\delta$  149.7, 141.6, 135.1, 128.8, 127.6, 126.9, 122.3, 121.9, 118.2, 118.1, 113.6, 107.4, 80.5, 44.2, 37.6, 37.5, 31.9, 18.0, 14.7. ESI-MS: Calcd for  $\text{C}_{19}\text{H}_{23}\text{N}_2$   $[\text{M}+\text{H}]^+$ : 279.2. Found: 279.2.

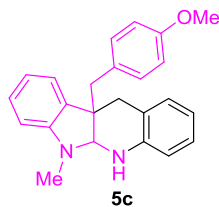

**5c**: Light yellow oil; Eluent: petroleum ether/EtOAc 15:1;  $^1\text{H}$  NMR (400 MHz,  $\text{CDCl}_3$ )  $\delta$  7.09 – 7.00 (m, 3H), 6.98 (d,  $J = 7.3$  Hz, 1H), 6.93 (d,  $J = 8.4$  Hz, 2H), 6.75 – 6.65 (m, 4H), 6.61 (d,  $J = 7.9$  Hz, 1H), 6.40 (d,  $J = 7.8$  Hz, 1H), 4.50 (br, 1H), 4.16 (s, 1H), 3.74 (s, 3H), 3.10 (d,  $J = 14.1$  Hz, 1H), 2.83 (d,  $J = 15.3$  Hz, 1H), 2.75 – 2.67 (m, 2H), 2.64 (s, 3H);  $^{13}\text{C}$  NMR (101 MHz,  $\text{CDCl}_3$ )  $\delta$  158.1, 149.7, 141.8, 134.4, 131.7, 129.7, 129.1, 127.7, 127.1, 122.6, 121.9, 118.2, 118.1, 113.7, 113.3, 107.7, 80.1, 55.2, 45.0, 40.0, 37.0, 31.8; ESI-MS: Calcd for  $\text{C}_{24}\text{H}_{25}\text{N}_2\text{O}$   $[\text{M}+\text{H}]^+$ : 357.2. Found: 357.1. HRMS (ESI $^+$ ): Calcd for  $\text{C}_{24}\text{H}_{25}\text{N}_2\text{O}$ ,  $[\text{M}+\text{H}]^+$   $m/z$  357.1967. Found 357.1973.

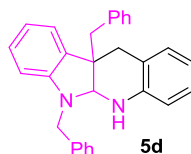

**5d**: Light yellow oil; Eluent: petroleum ether/EtOAc 15:1;  $^1\text{H}$  NMR (600 MHz,  $\text{CDCl}_3$ )  $\delta$  7.27 – 7.16 (m, 6H), 7.10 (d,  $J = 7.0$  Hz, 2H), 7.03 (d,  $J = 7.2$  Hz, 1H), 7.00 – 6.89 (m, 5H), 6.72 – 6.61 (m, 2H), 6.42 (d,  $J = 7.7$  Hz, 1H), 6.15 (d,  $J = 7.8$  Hz, 1H), 4.64 (s, 1H), 4.20 – 4.08 (m, 3H), 3.19 (d,  $J = 13.5$  Hz, 1H), 2.99 (d,  $J = 14.6$  Hz, 1H), 2.90 – 2.82 (m, 2H);  $^{13}\text{C}$  NMR (151 MHz,  $\text{CDCl}_3$ )  $\delta$  150.2, 142.9, 138.5, 137.4, 133.2, 130.6, 128.6, 128.5, 127.9, 127.8, 127.3, 127.1, 126.9, 126.4, 124.1, 122.8, 118.9, 117.6, 114.5, 106.5, 79.0, 49.2, 49.0, 44.1, 37.5. ESI-MS: Calcd for  $\text{C}_{29}\text{H}_{27}\text{N}_2$   $[\text{M}+\text{H}]^+$ : 403.2. Found: 403.1. HRMS (ESI $^+$ ): Calcd for  $\text{C}_{29}\text{H}_{27}\text{N}_2$ ,  $[\text{M}+\text{H}]^+$   $m/z$  403.2174. Found 403.2181.

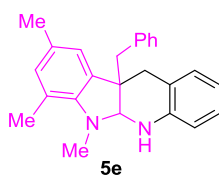

**5e**: Light yellow oil; Eluent: petroleum ether/EtOAc 15:1;  $^1\text{H}$  NMR (600 MHz,  $\text{CDCl}_3$ )  $\delta$  7.19 – 7.11 (m, 3H), 7.06 – 6.99 (m, 3H), 6.97 (d,  $J = 7.3$  Hz, 1H), 6.84 (s, 1H), 6.71 – 6.63 (m, 2H),



6.60 (d,  $J = 7.8$  Hz, 1H), 4.45 (br, 1H), 4.00 (s, 1H), 3.15 (d,  $J = 14.0$  Hz, 1H), 2.79 (d,  $J = 15.3$  Hz, 1H), 2.73 – 2.64 (m, 5H), 2.26 (s, 3H), 2.25 (s, 3H);  $^{13}\text{C}$  NMR (151 MHz,  $\text{CDCl}_3$ )  $\delta$  145.8, 141.7, 137.8, 135.7, 131.7, 130.6, 129.0, 128.8, 127.9, 127.0, 126.2, 121.5, 121.0, 120.8, 118.0, 113.6, 81.1, 44.7, 41.0, 37.7, 36.4, 20.9, 19.5. ESI-MS: Calcd for  $\text{C}_{25}\text{H}_{27}\text{N}_2$   $[\text{M}+\text{H}]^+$ : 355.2. Found: 355.1. HRMS (ESI $^+$ ): Calcd for  $\text{C}_{25}\text{H}_{27}\text{N}_2$ ,  $[\text{M}+\text{H}]^+$   $m/z$  355.2174. Found 355.2183.

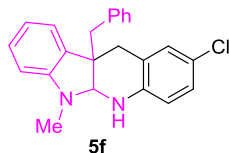

**5f**: Light yellow oil; Eluent: petroleum ether/EtOAc 15:1;  $^1\text{H}$  NMR (400 MHz,  $\text{CDCl}_3$ )  $\delta$  7.21 – 7.14 (m, 3H), 7.10 – 7.04 (m, 2H), 7.02 – 6.93 (m, 4H), 6.77 – 6.69 (m, 1H), 6.52 (d,  $J = 8.1$  Hz, 1H), 6.39 (d,  $J = 8.4$  Hz, 1H), 4.49 (br, 1H), 4.18 (s, 1H), 3.15 (d,  $J = 14.0$  Hz, 1H), 2.82 (d,  $J = 15.4$  Hz, 1H), 2.76 – 2.67 (m, 2H), 2.62 (s, 3H);  $^{13}\text{C}$  NMR (101 MHz,  $\text{CDCl}_3$ )  $\delta$  149.6, 140.5, 137.3, 133.8, 130.7, 128.7, 128.0, 128.0, 126.9, 126.4, 123.7, 122.7, 122.6, 118.3, 114.7, 107.8, 80.0, 45.06, 41.15, 36.8, 31.8. ESI-MS: Calcd for  $\text{C}_{23}\text{H}_{22}\text{ClN}_2$   $[\text{M}+\text{H}]^+$ : 361.1. Found: 361.1. HRMS (ESI $^+$ ): Calcd for  $\text{C}_{23}\text{H}_{22}\text{ClN}_2$ ,  $[\text{M}+\text{H}]^+$   $m/z$  361.1472. Found 361.1475.

#### 4. References

1. A. N. Kost, G. A. Golubeva, V. G. Zabrodnyaya and Y. N. Portnov, *Chem. Heterocycl. Compd.*, 1975, **12**, 1383; A. N. Kost, Y. N. Portnov, V. G. Zabrodnyaya, V.G. Voronin and A. N. Kost, *Chem. Heterocycl. Compd.*, 1983, **11**, 1175.
2. F. J. Robertson, B. D. Kenimer and J. Wu, *Tetrahedron Lett.*, 2011, **67**, 4327.

## 5. NMR Spectra of 1a-ah, 3a-an, 4 and 5a-f

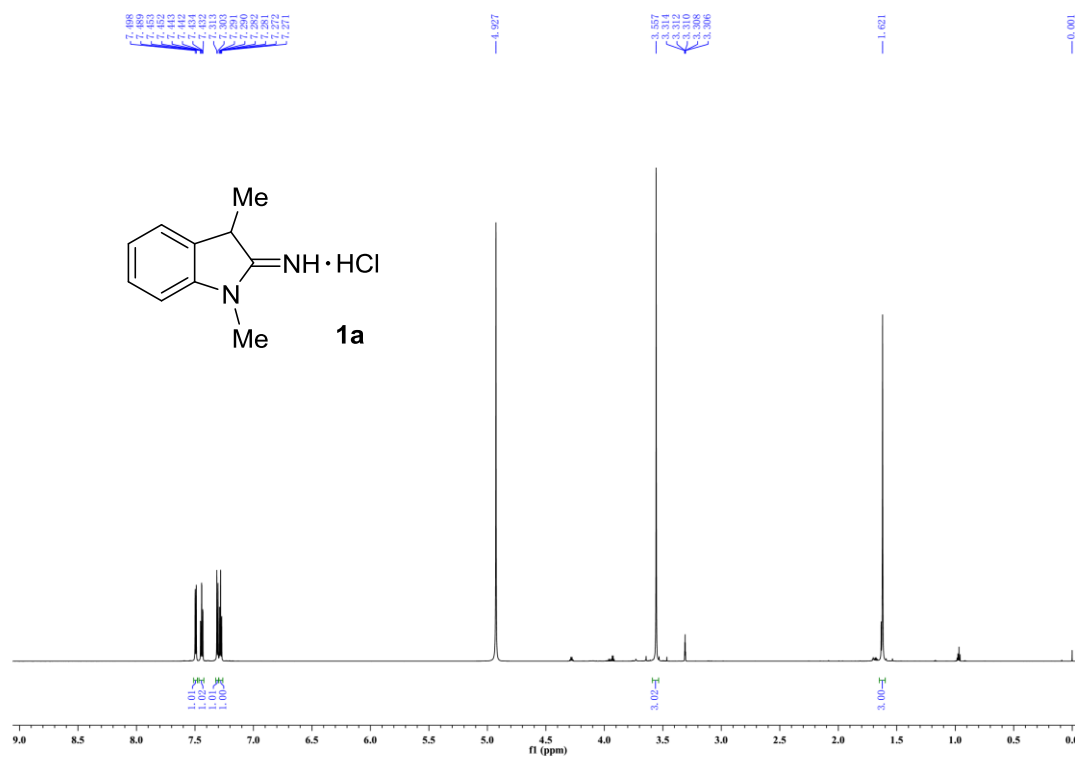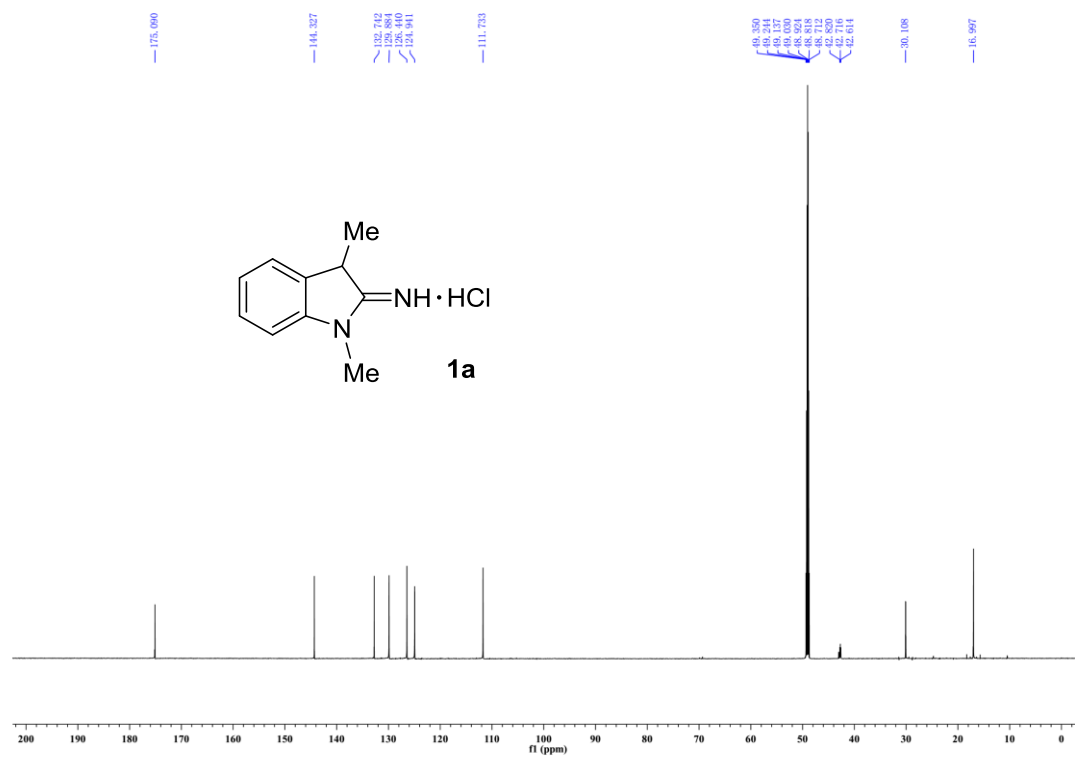

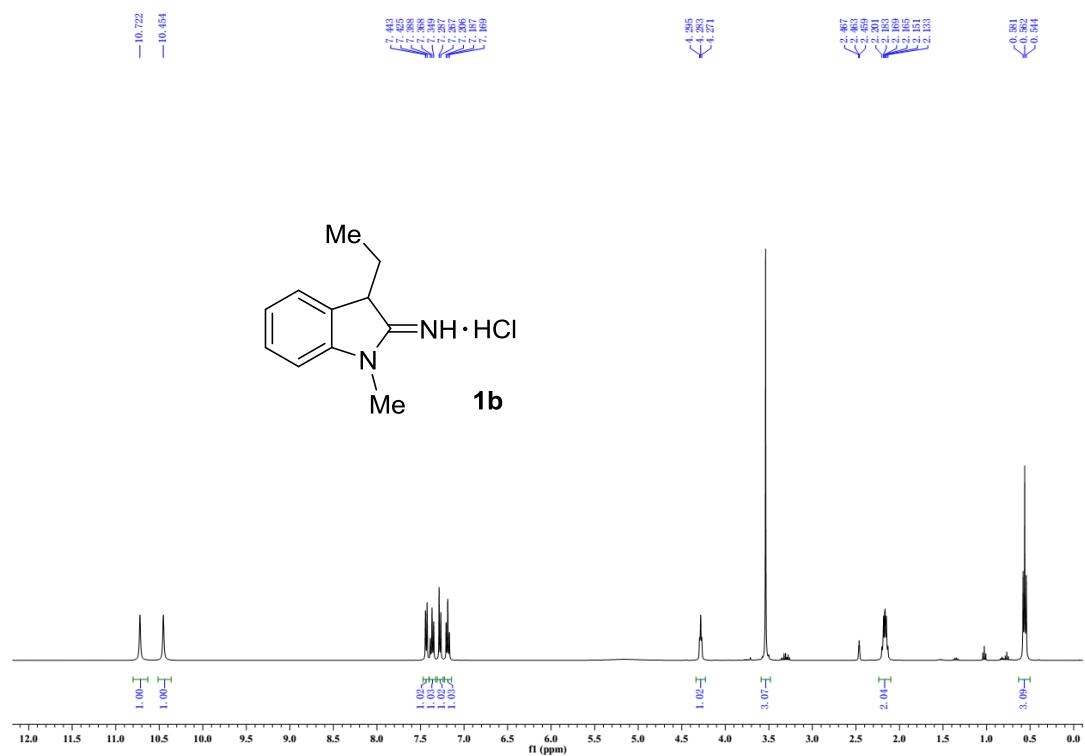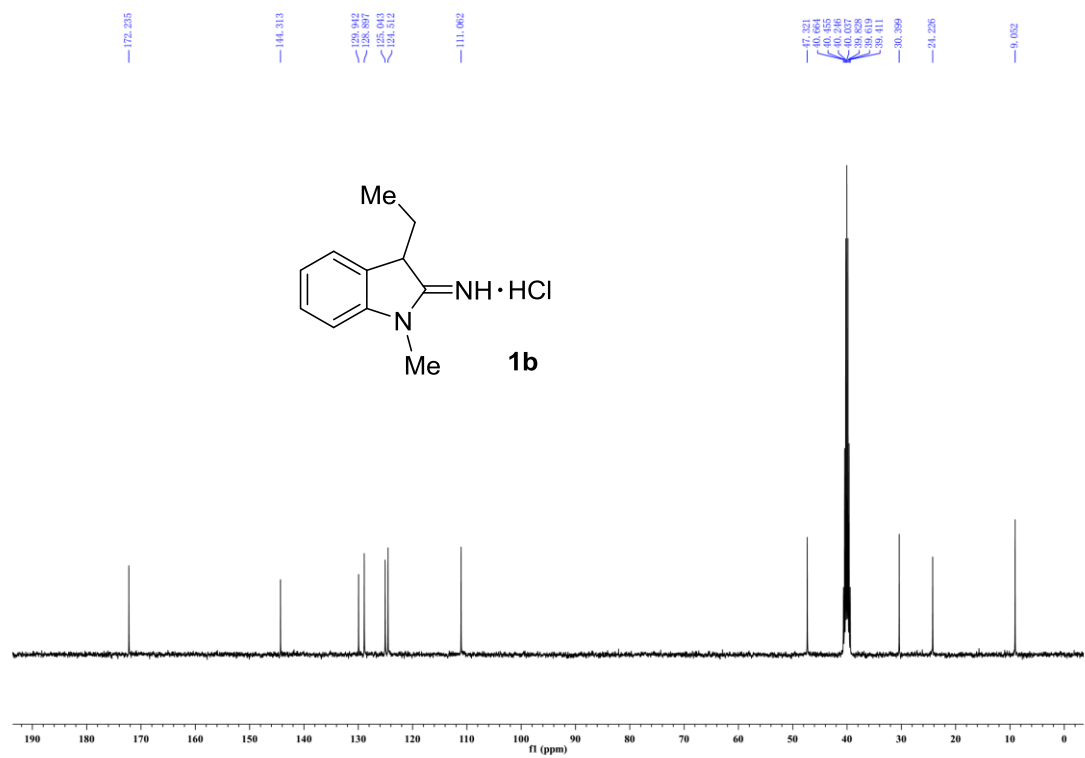

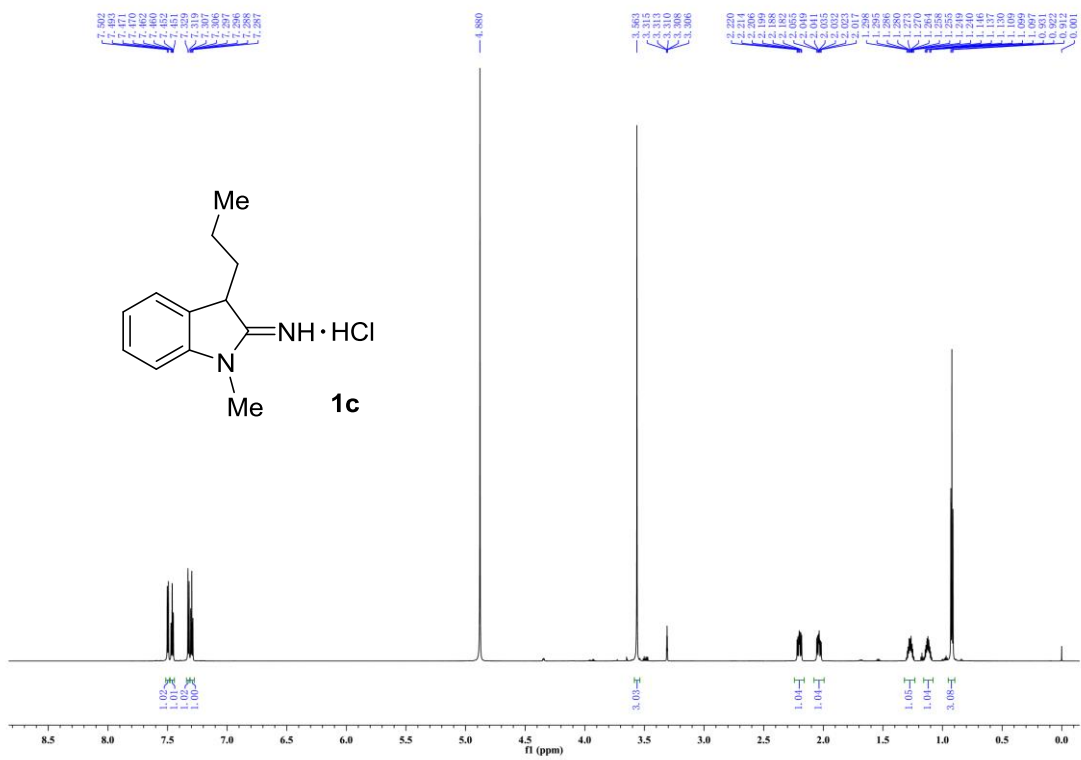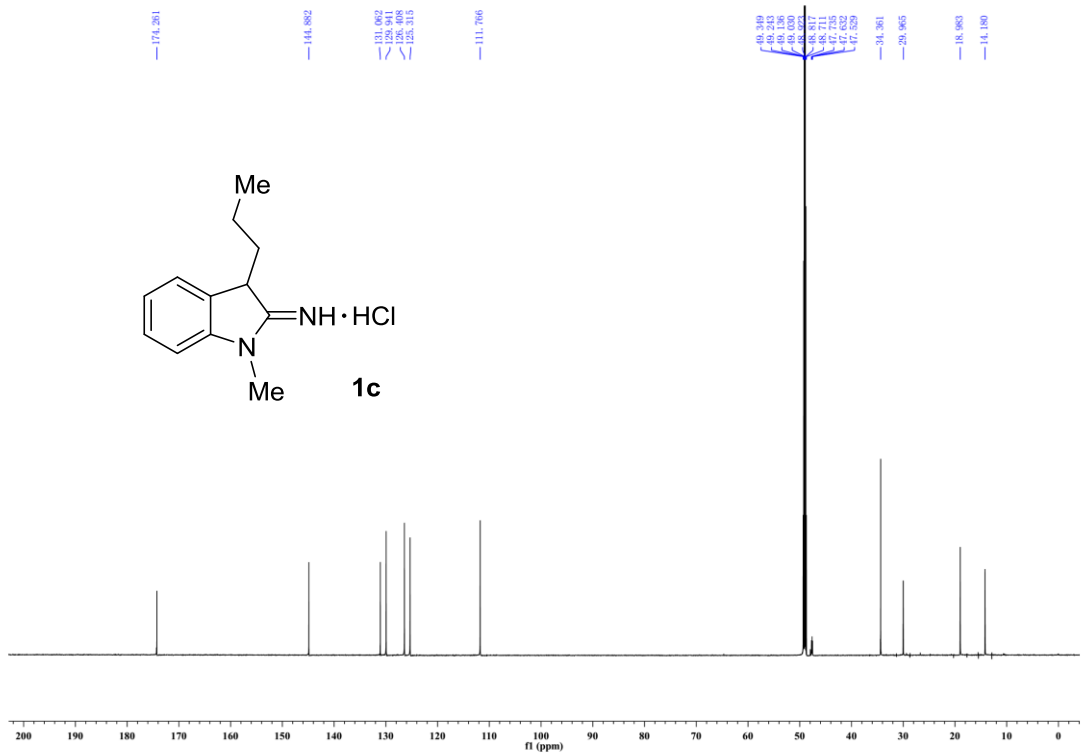

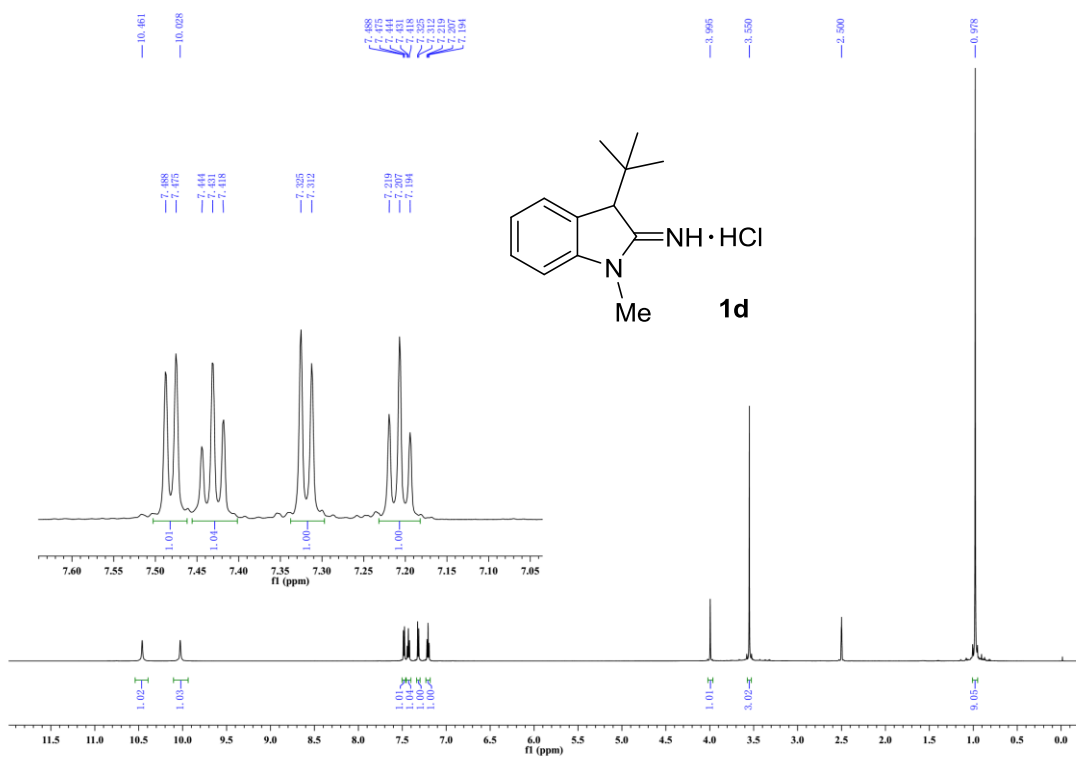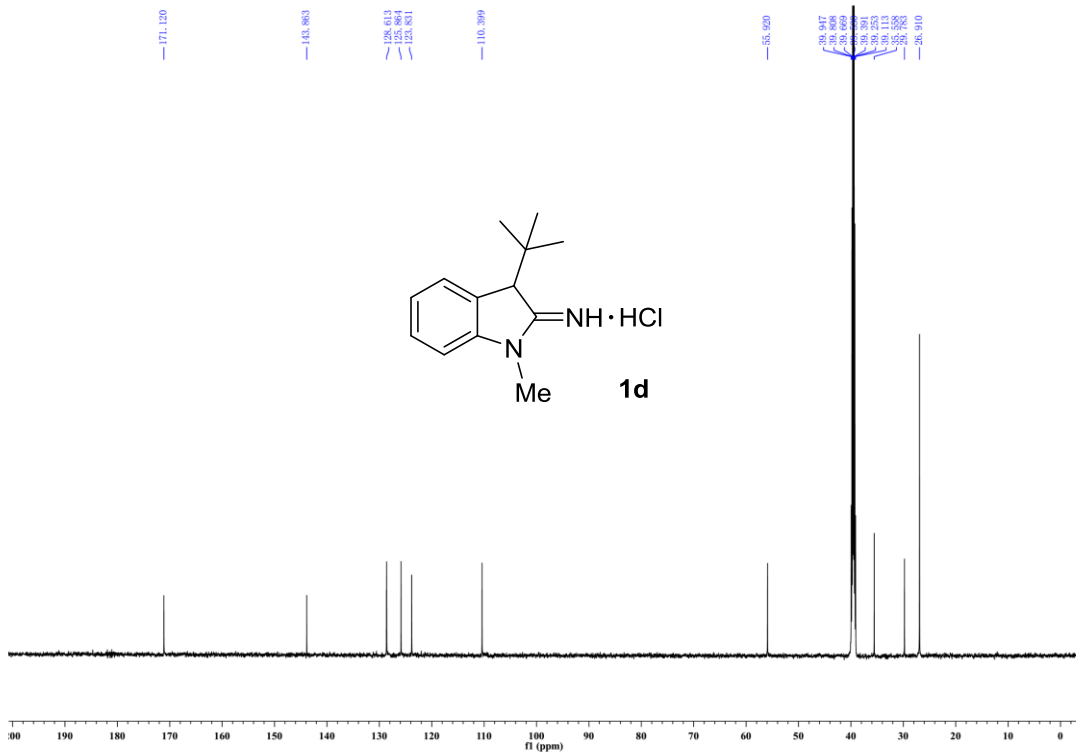

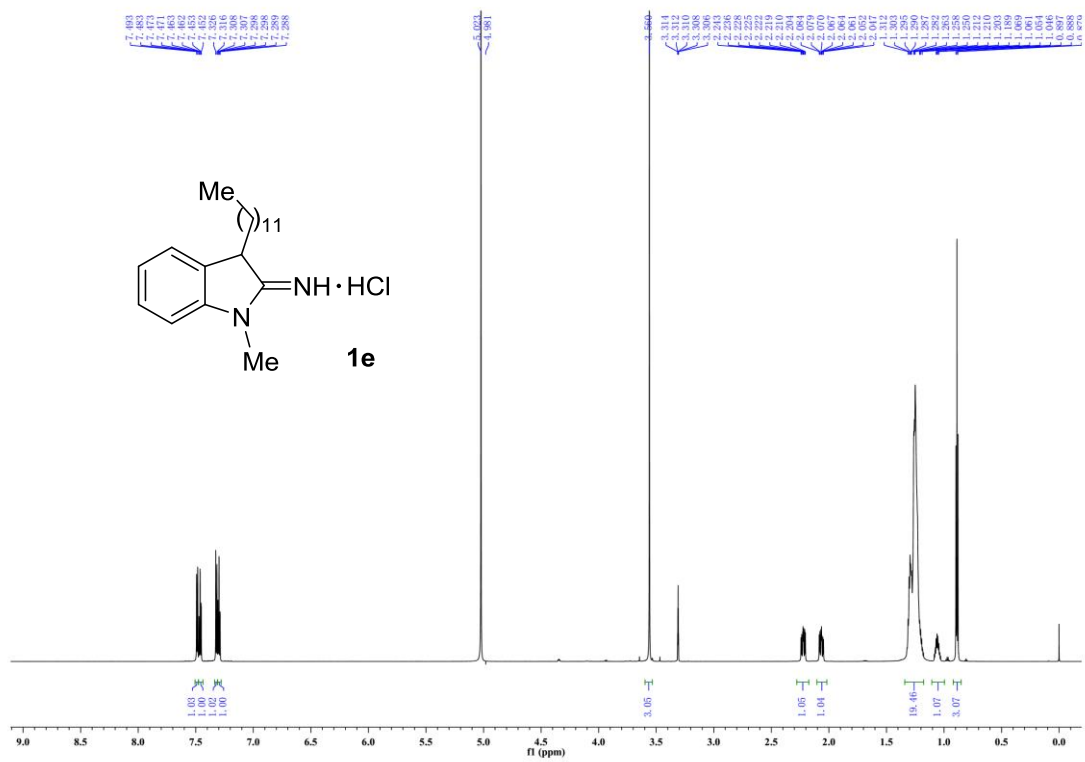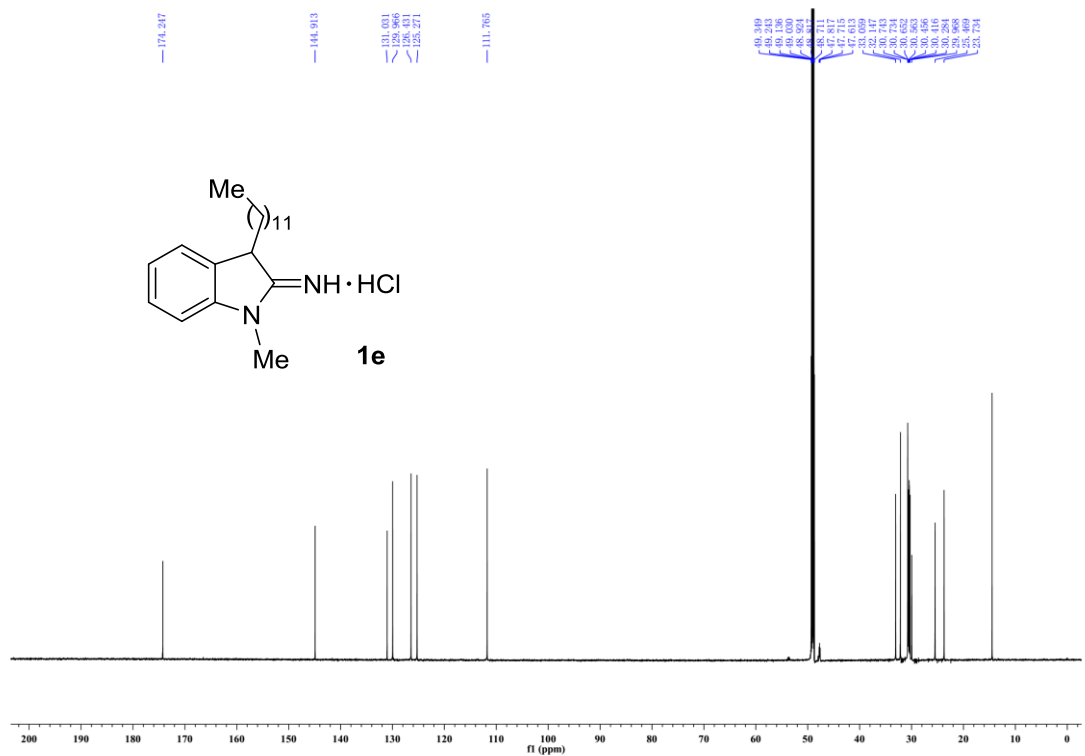

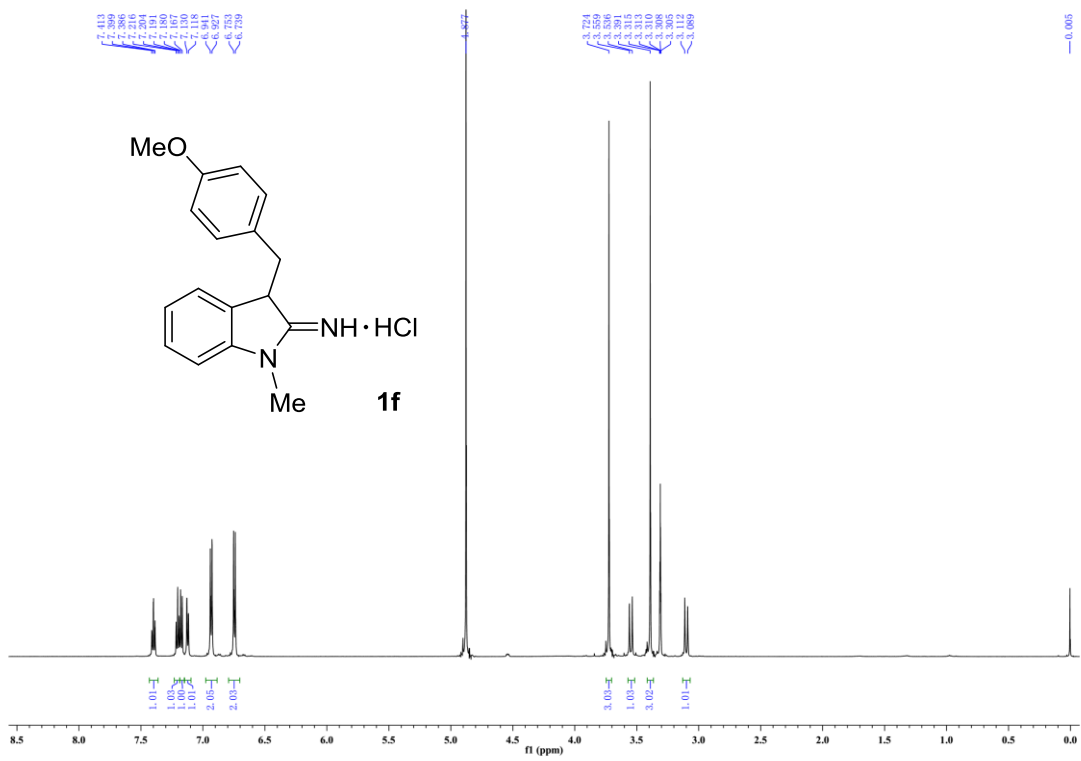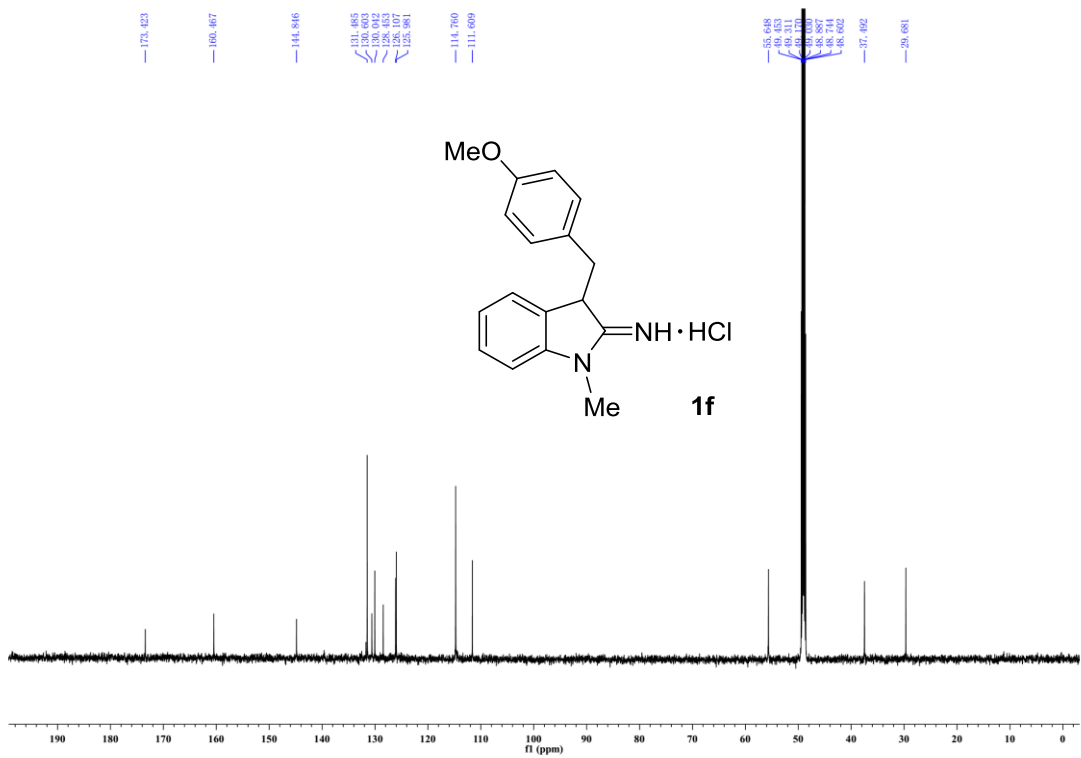



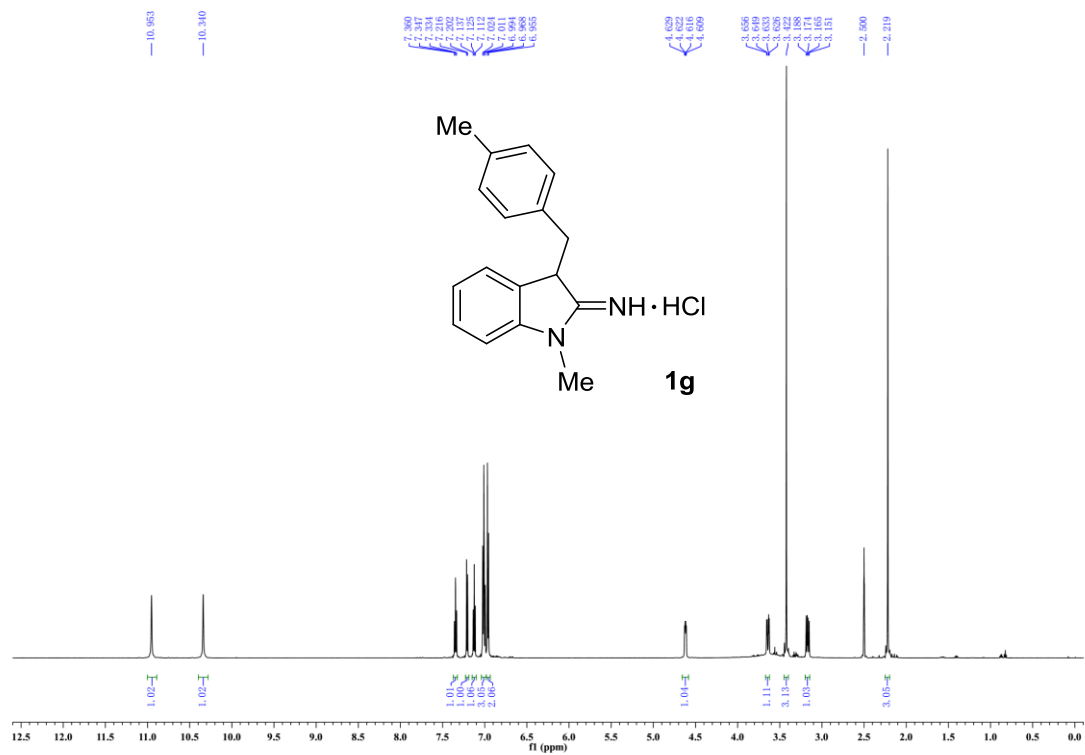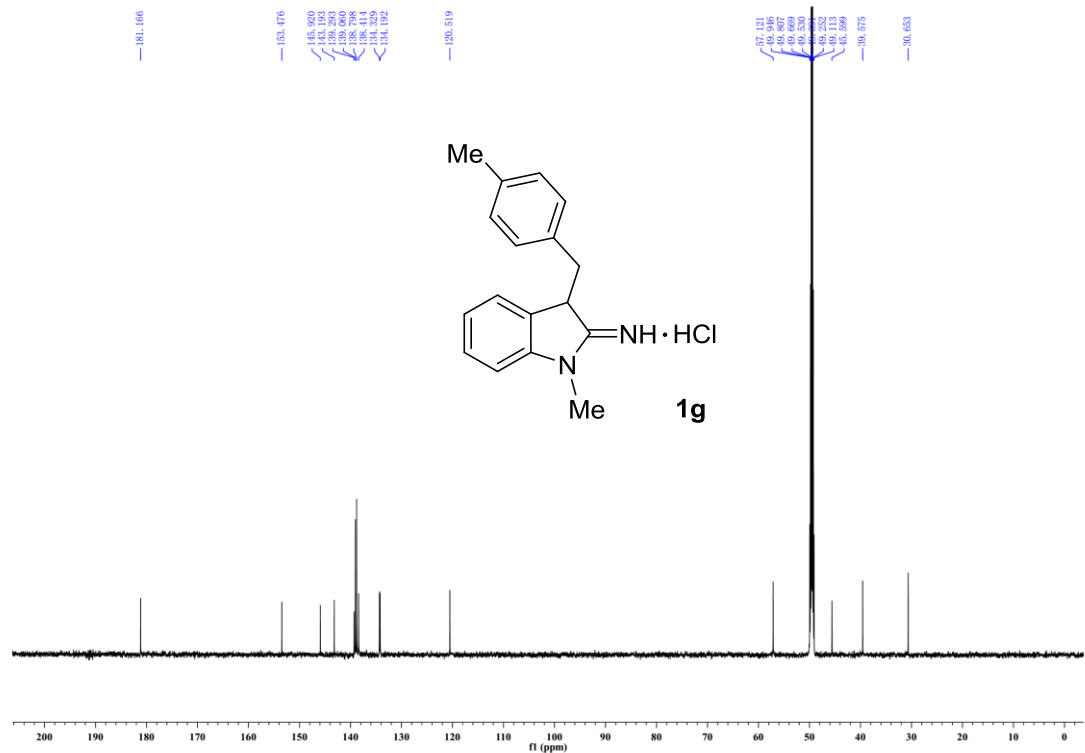

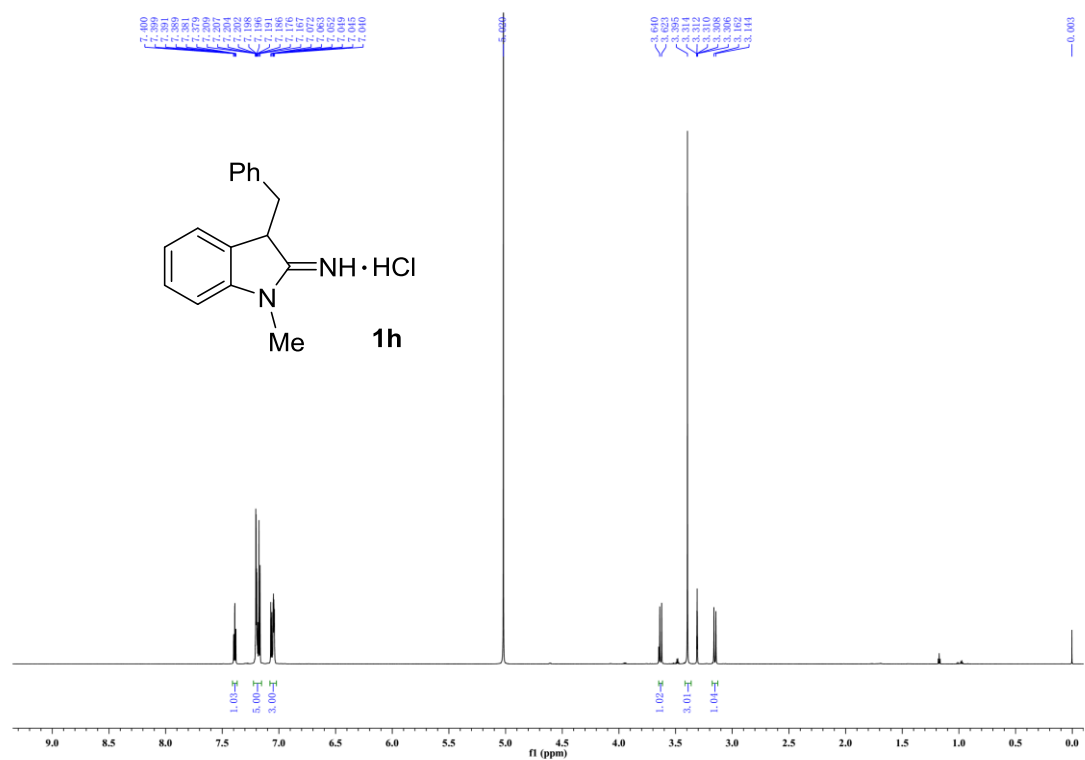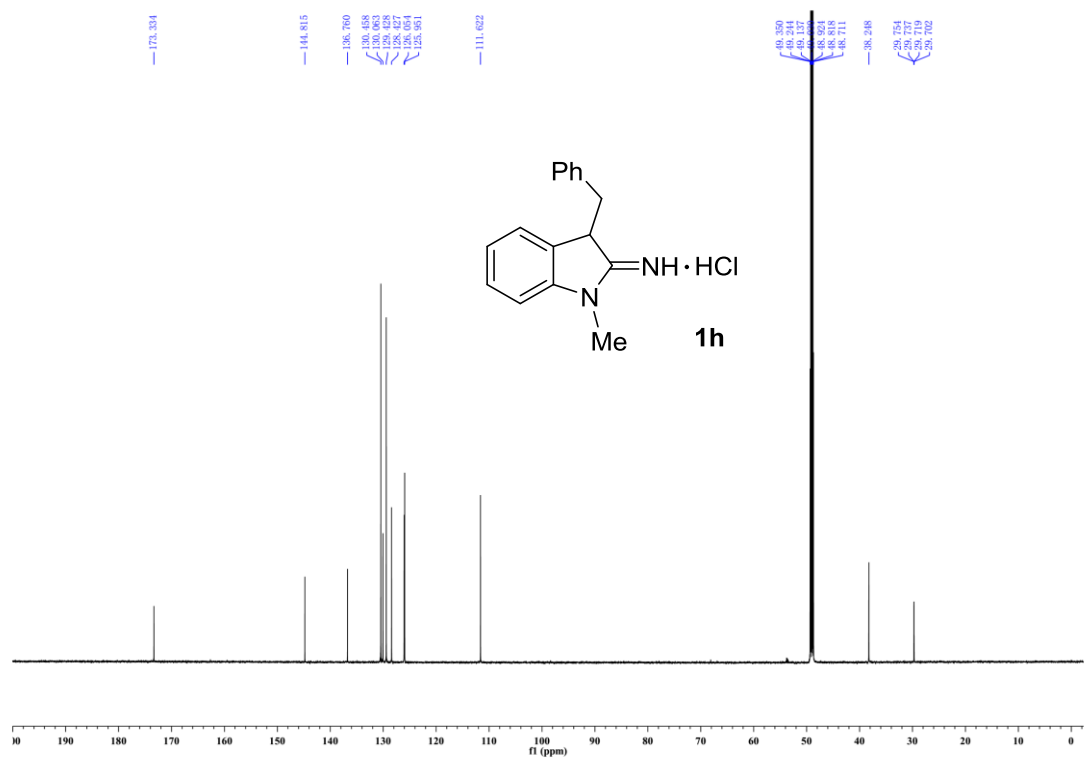

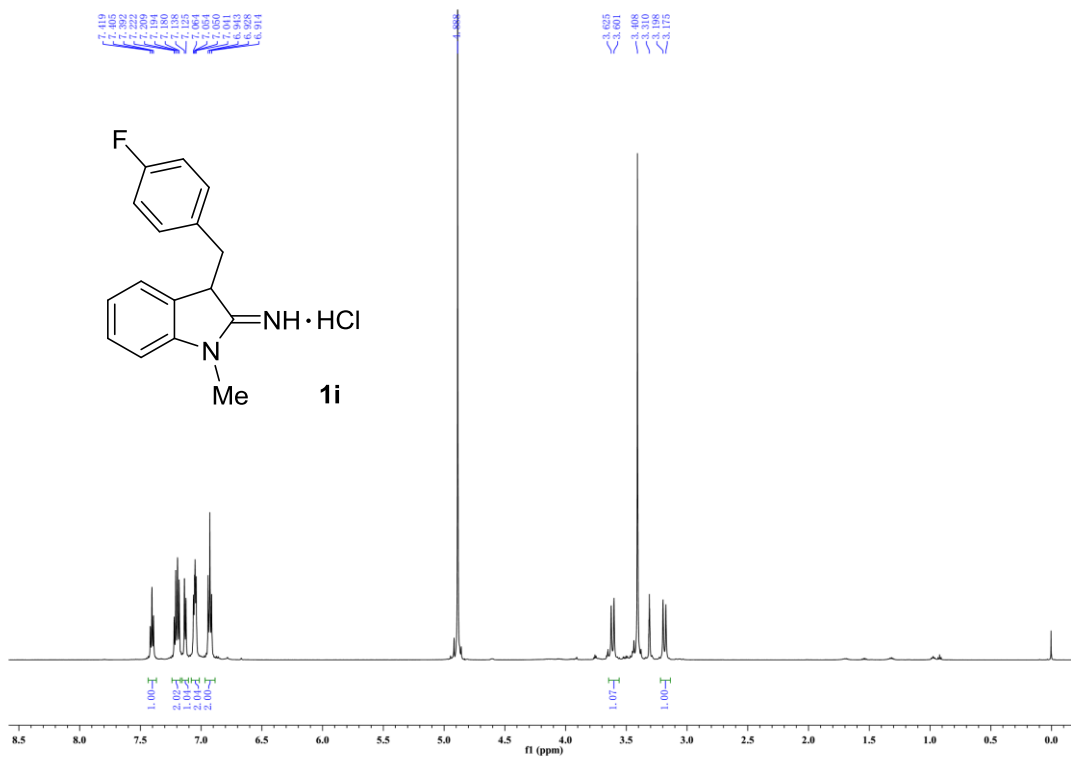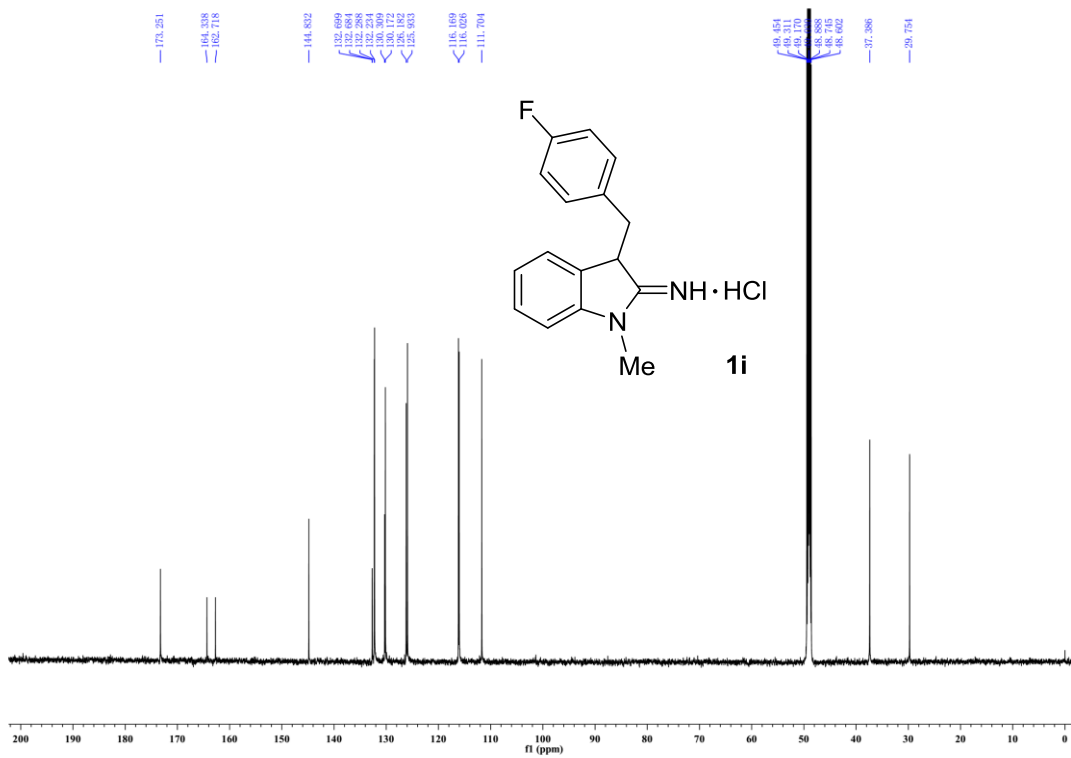

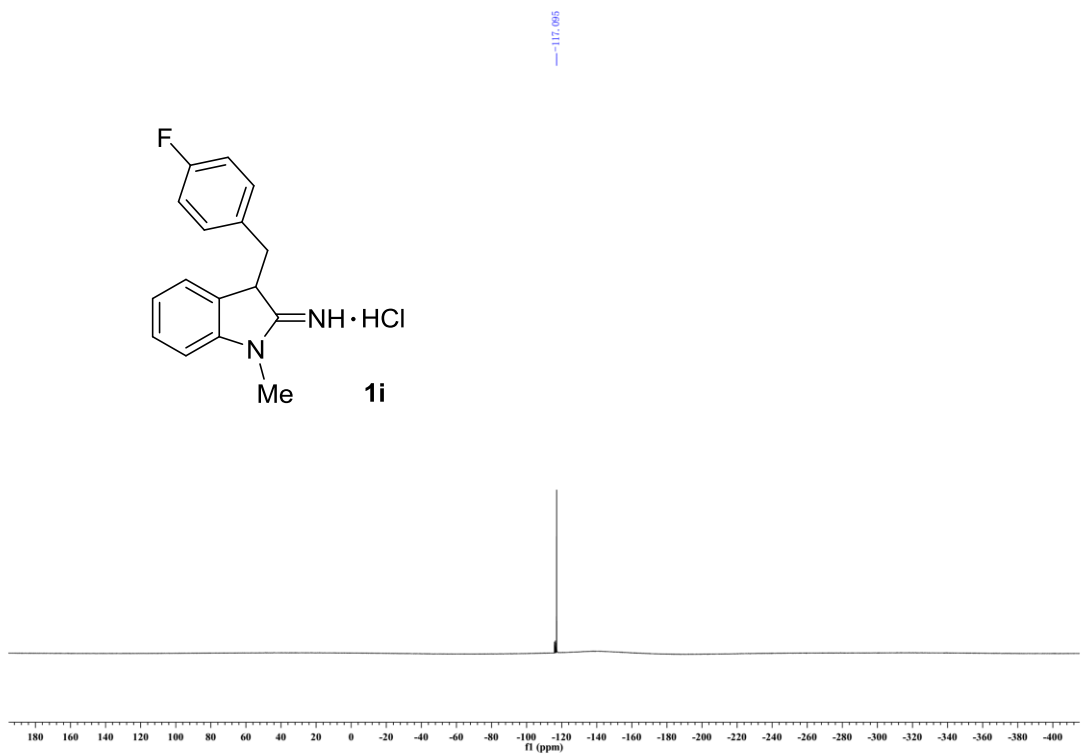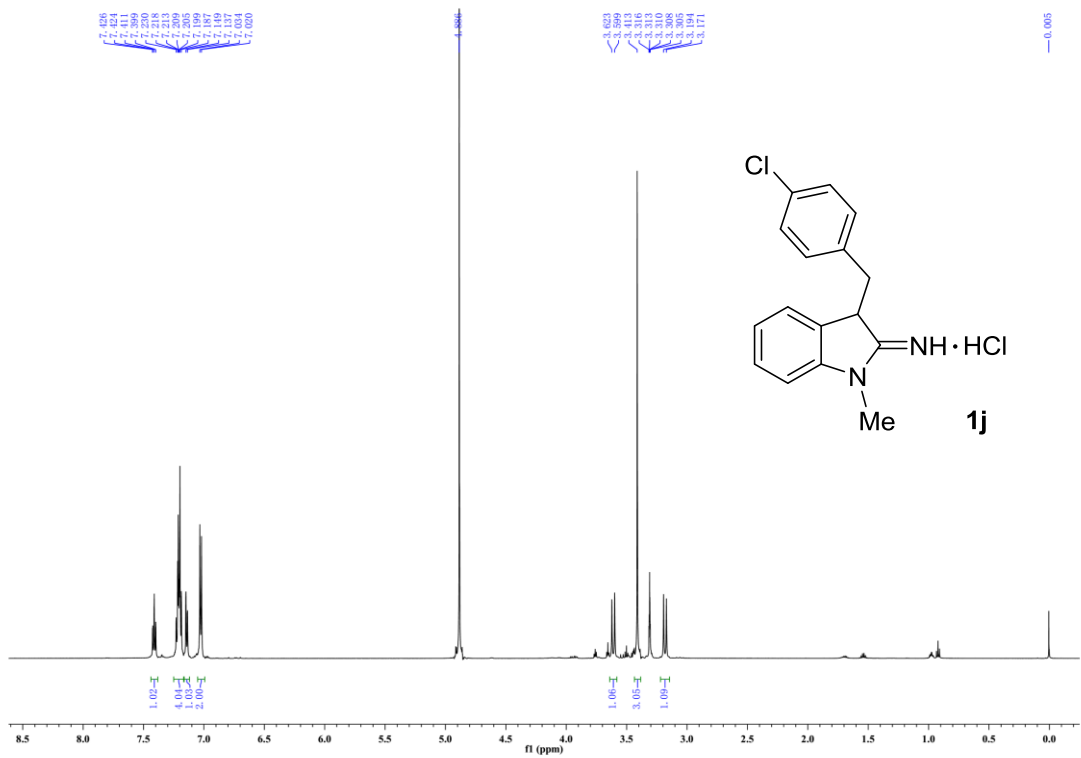

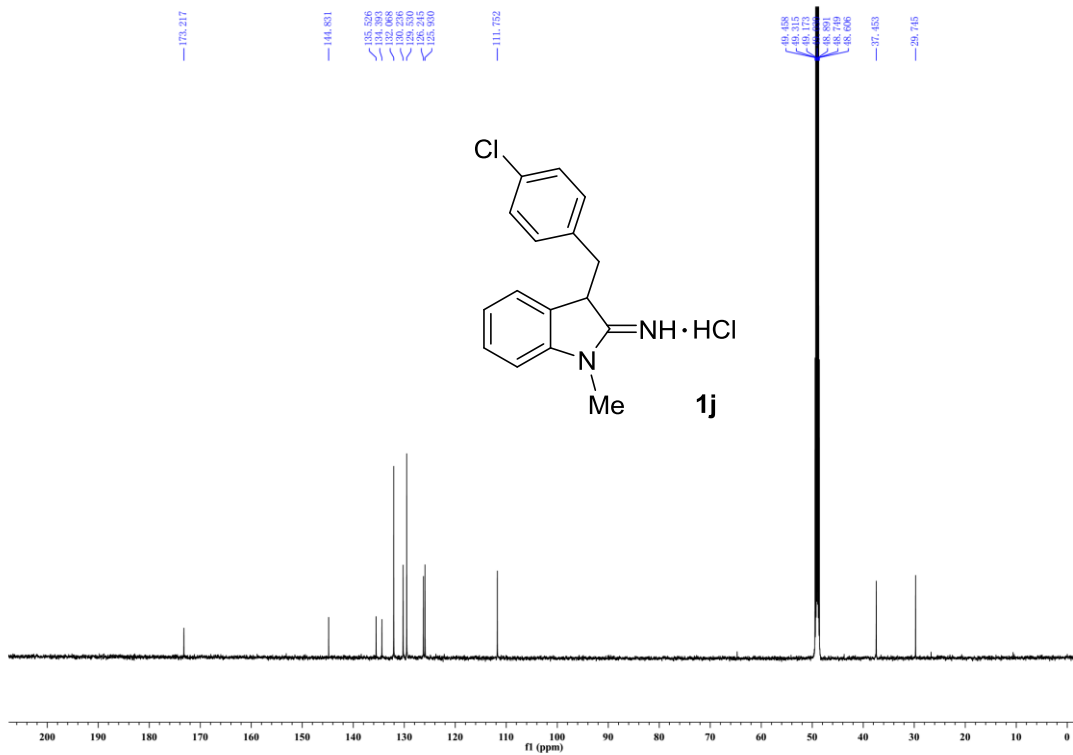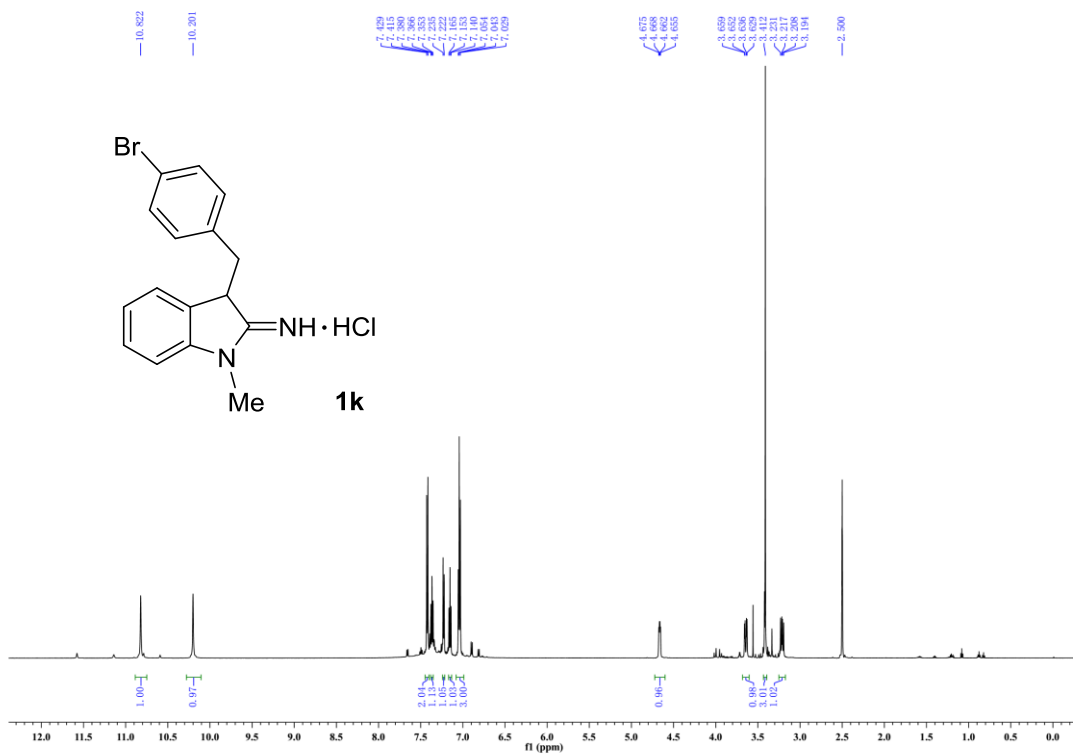

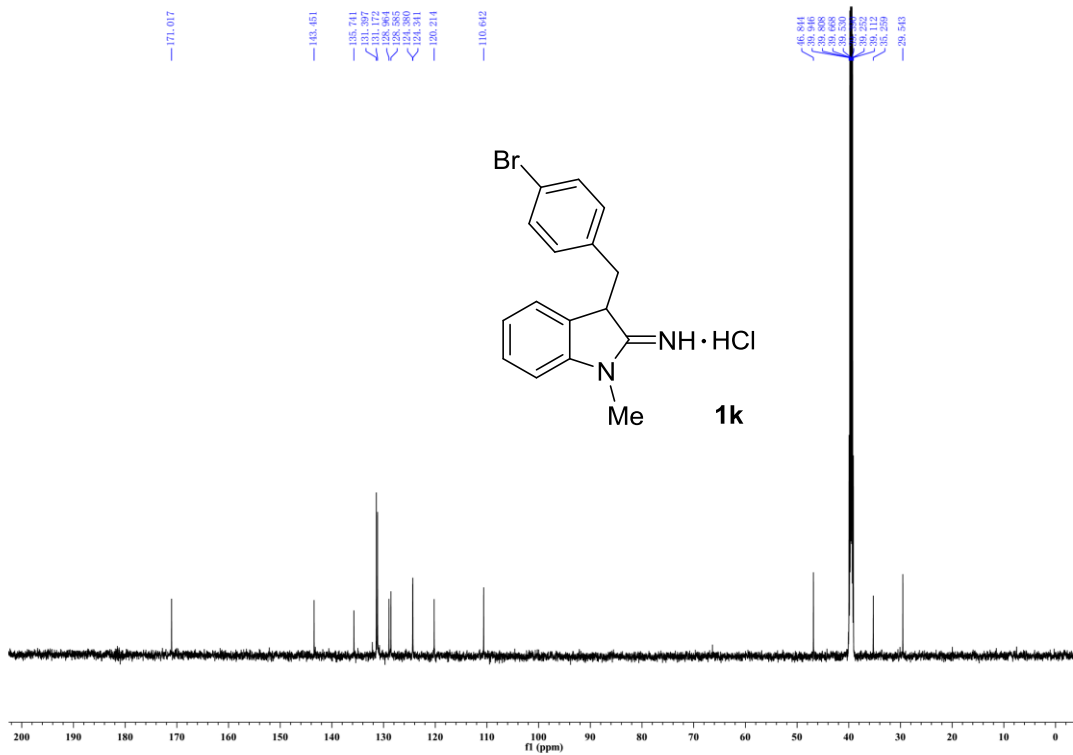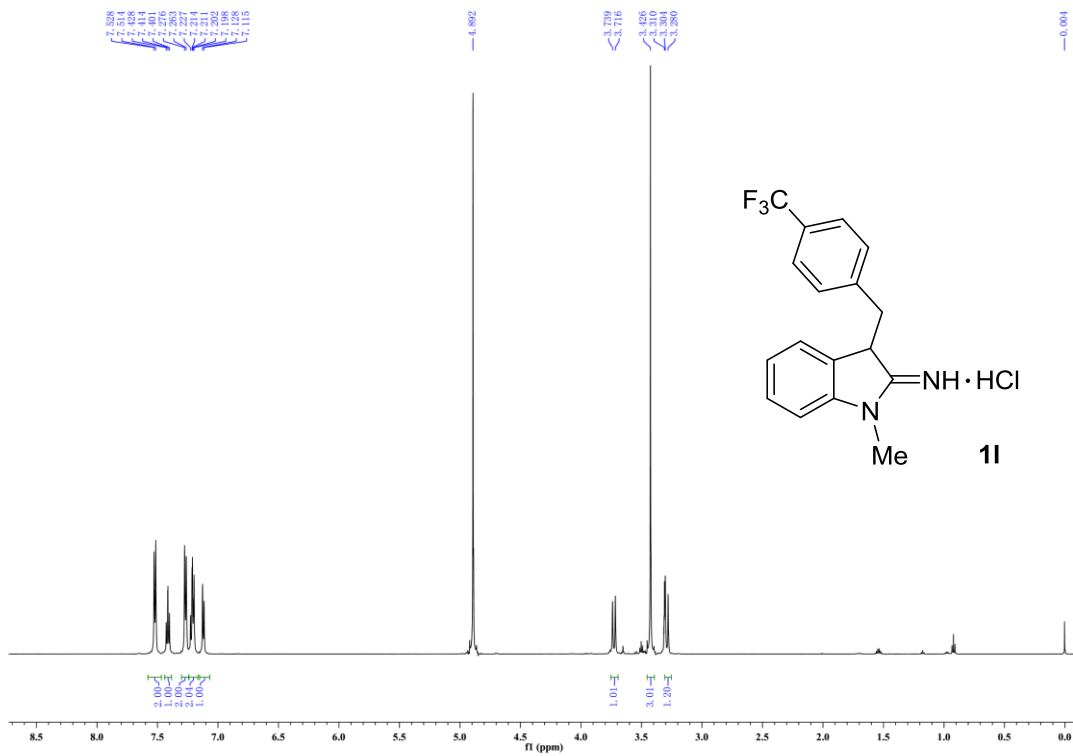

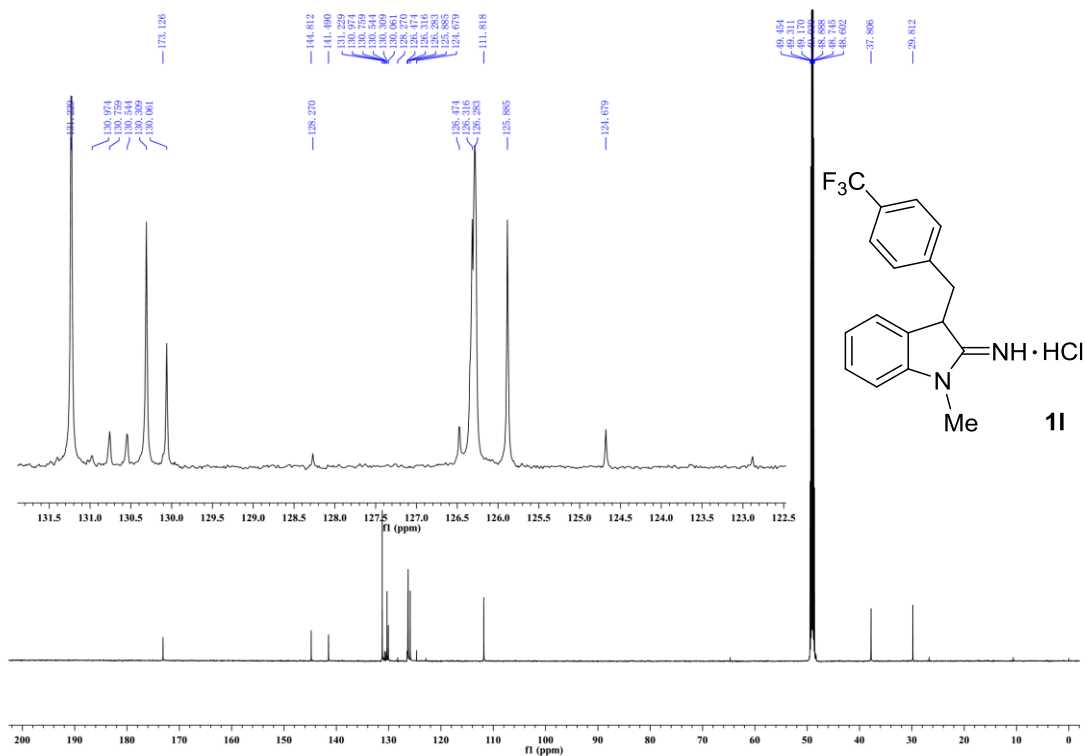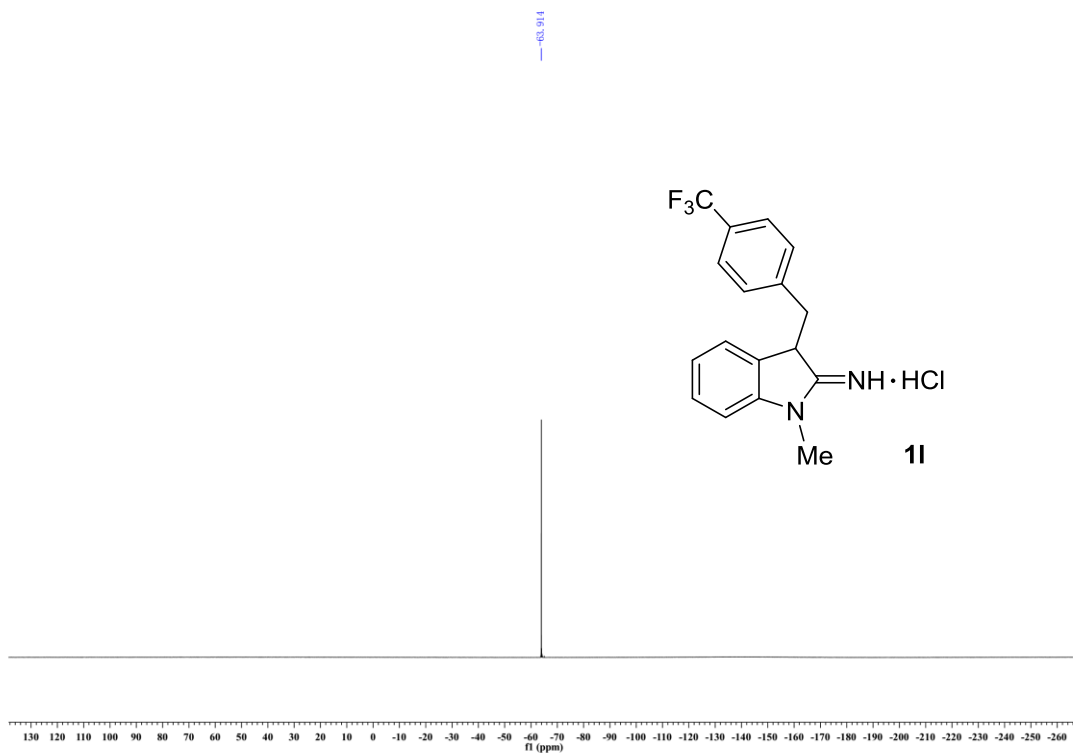

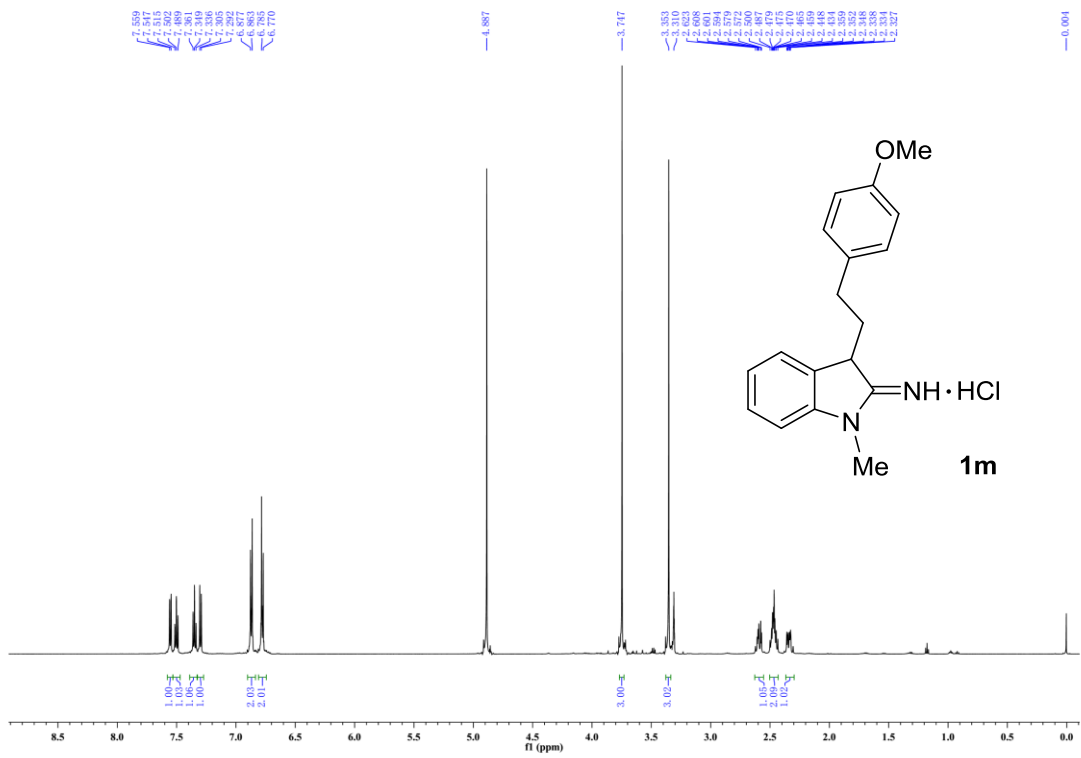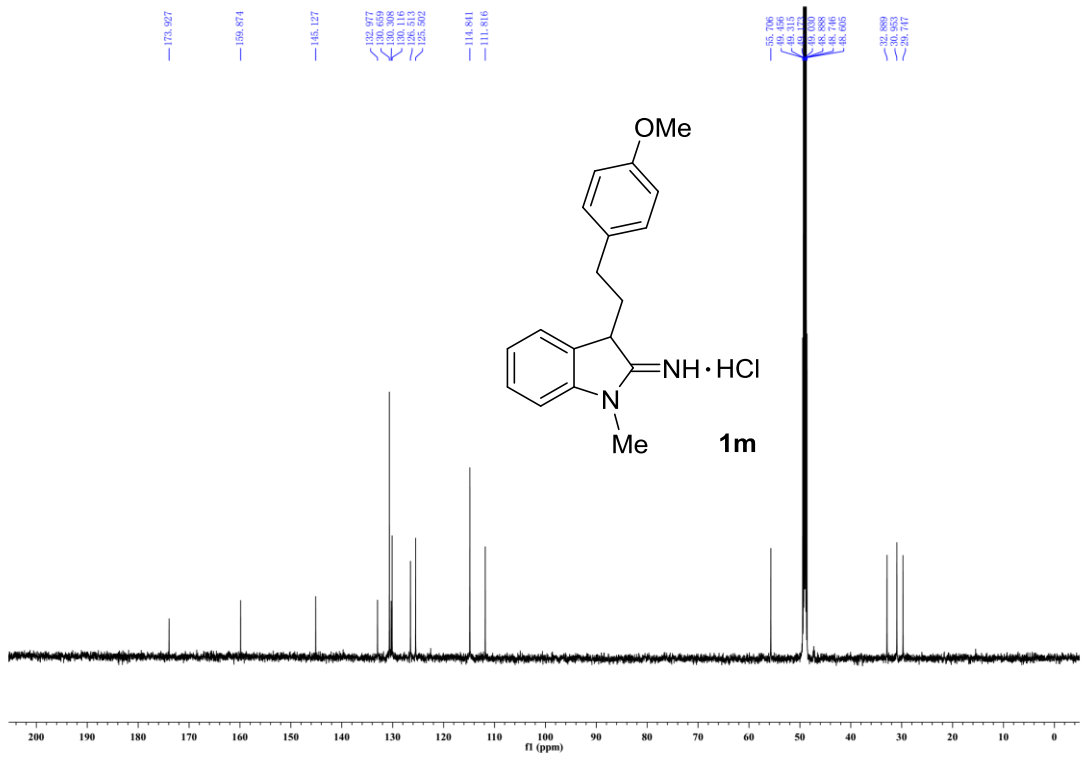



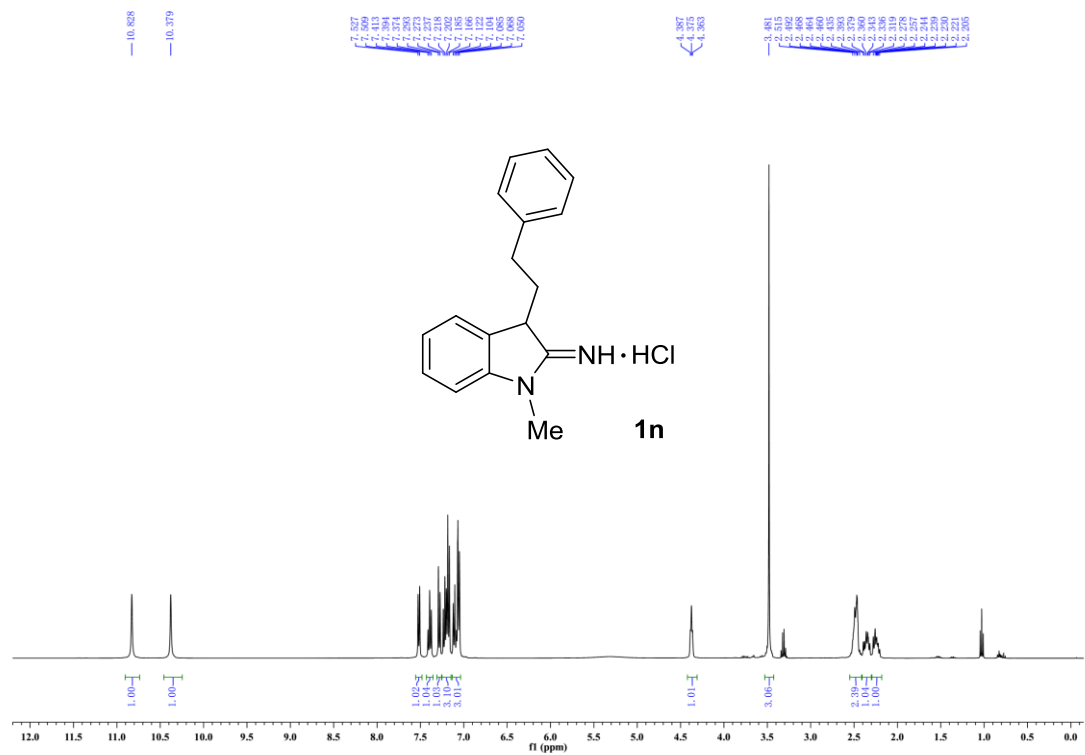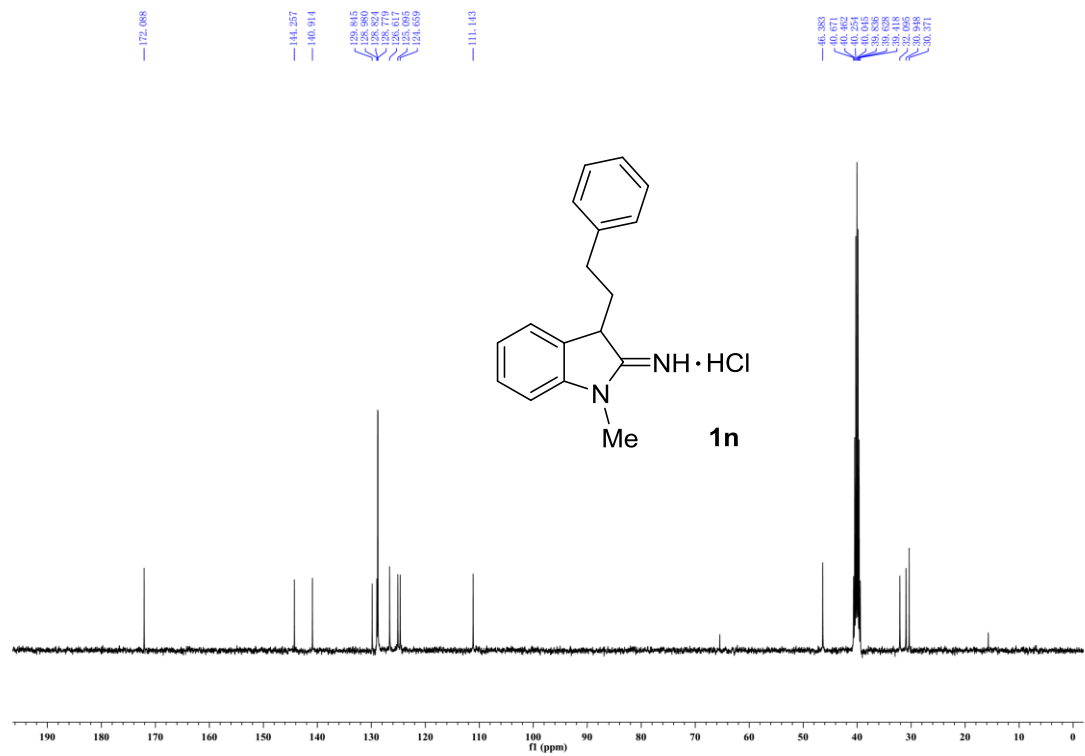

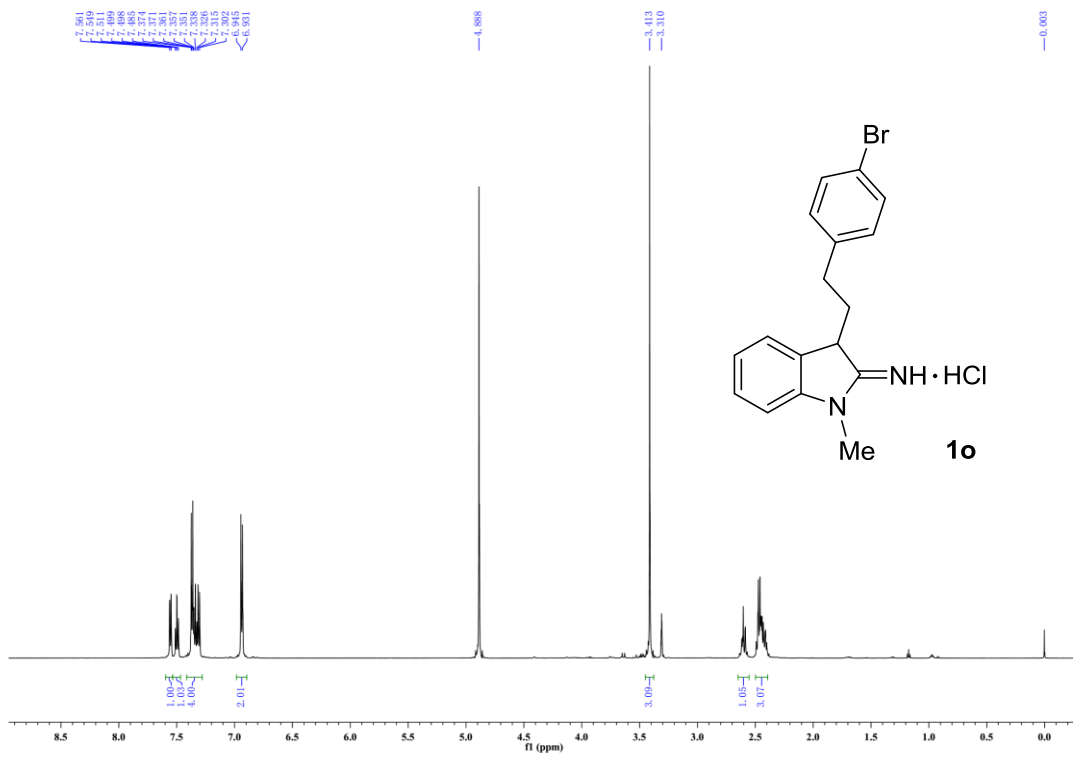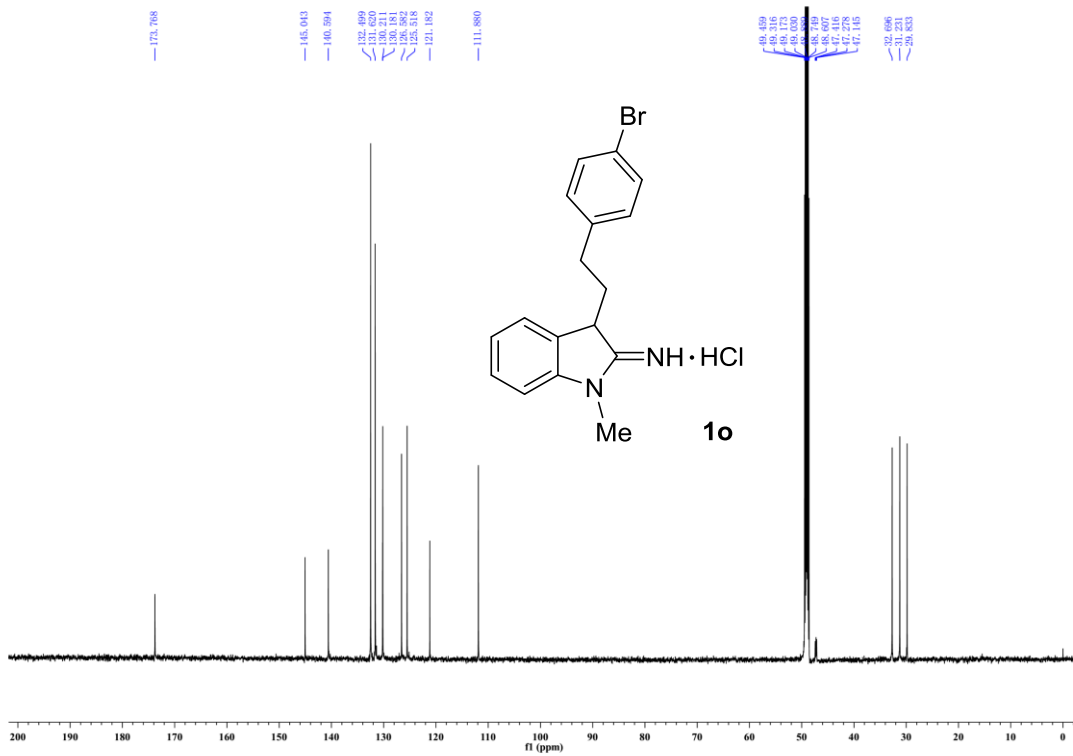

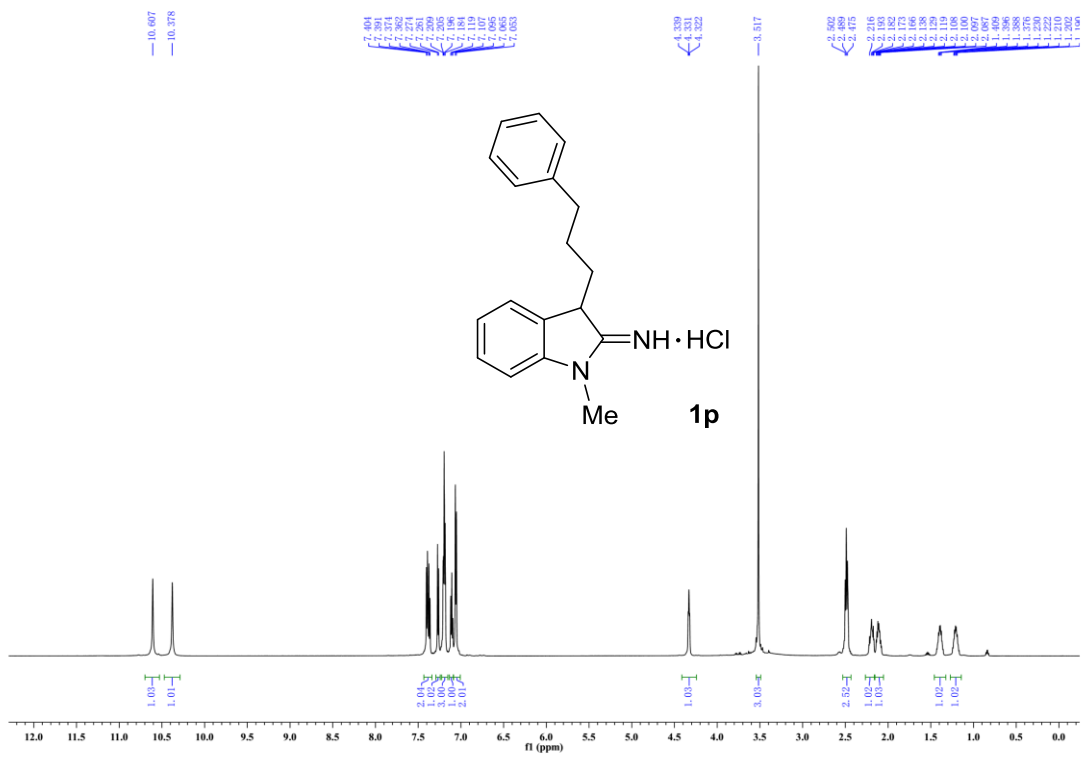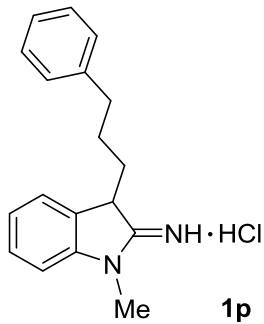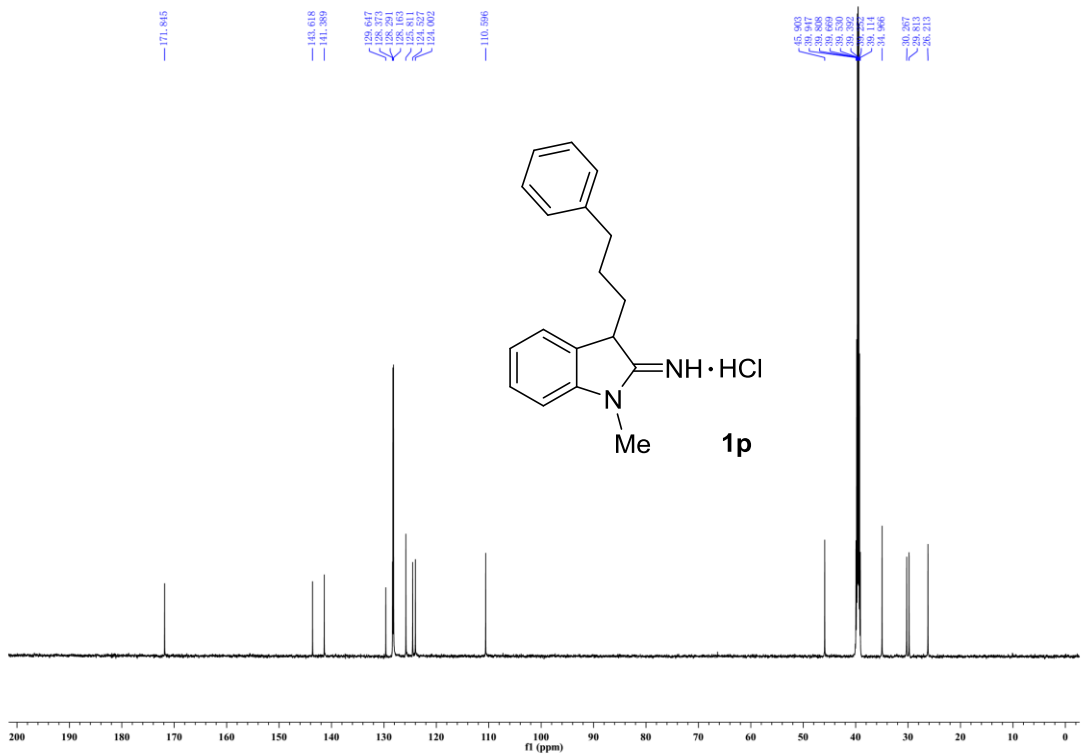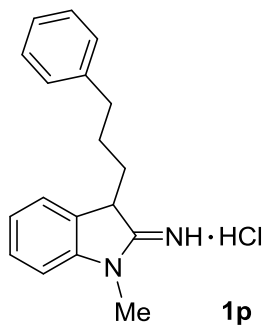

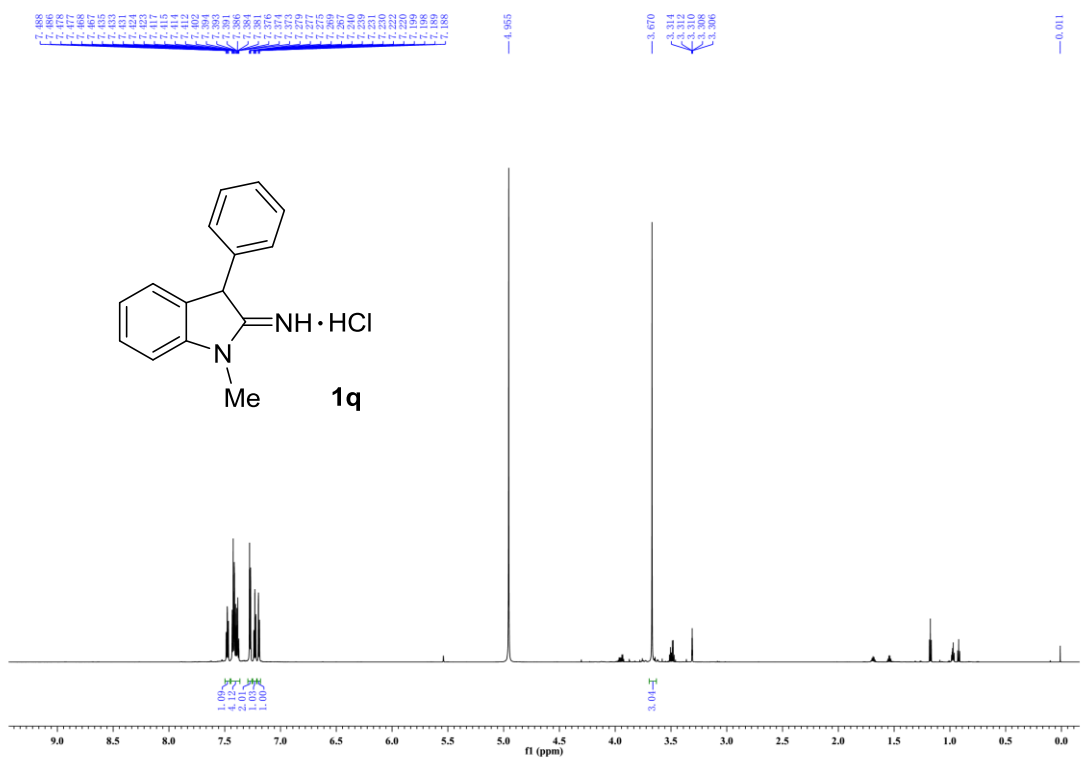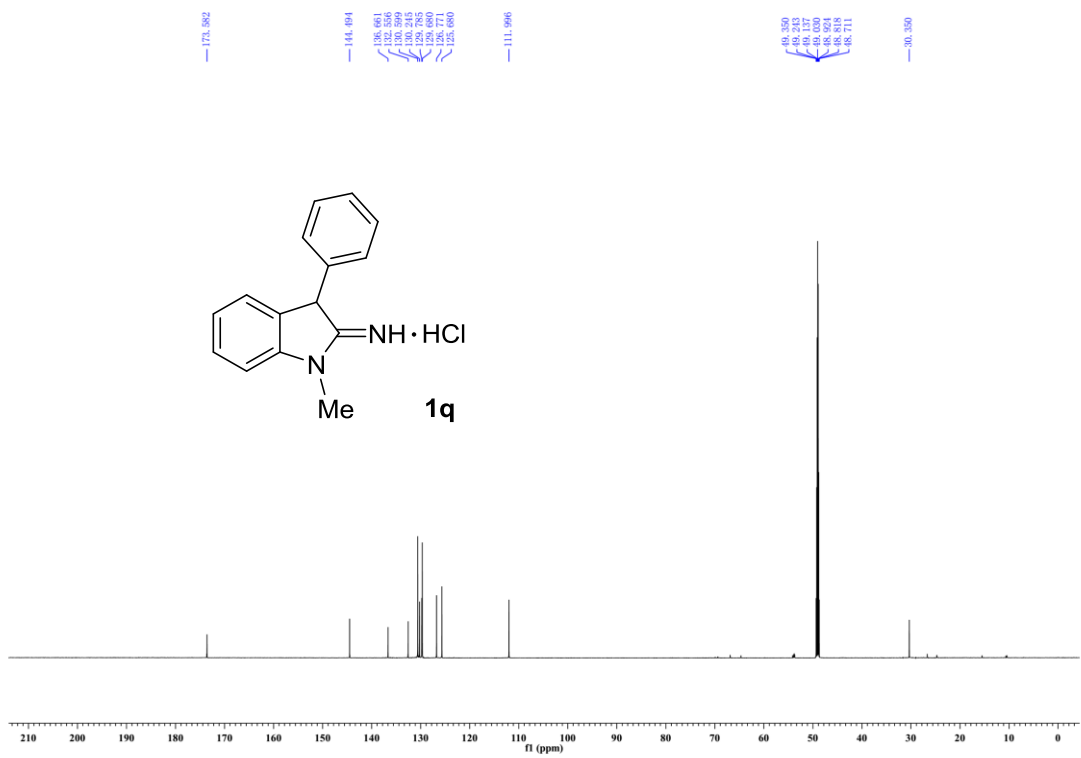

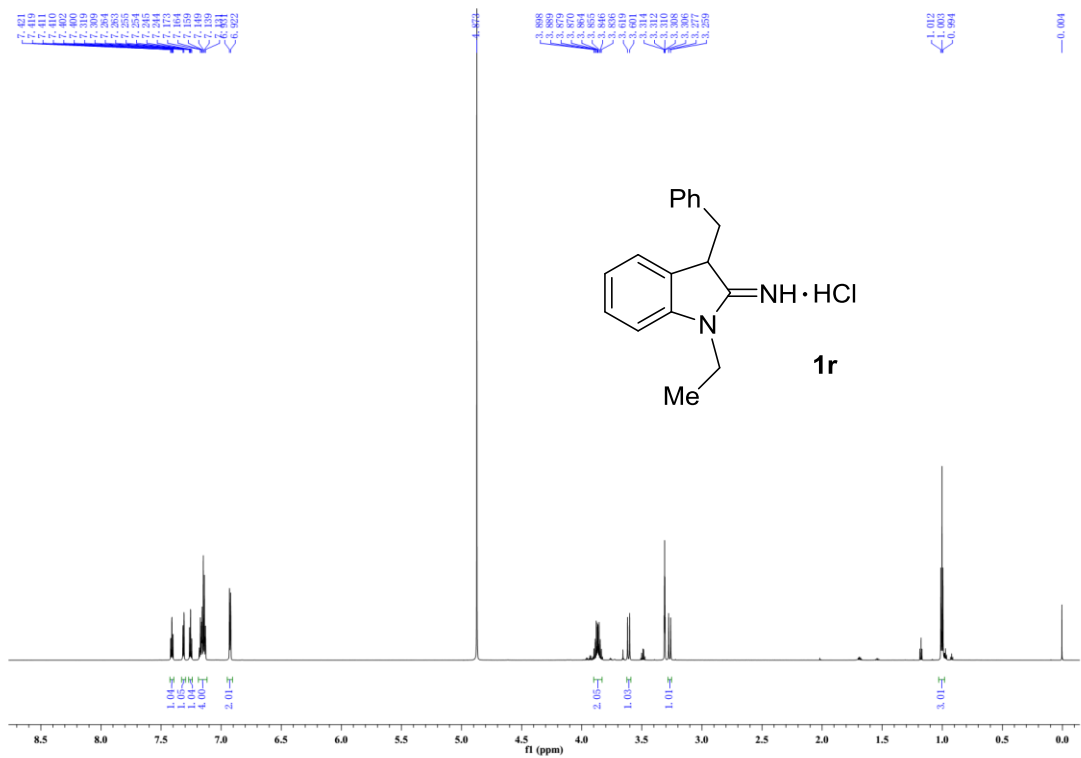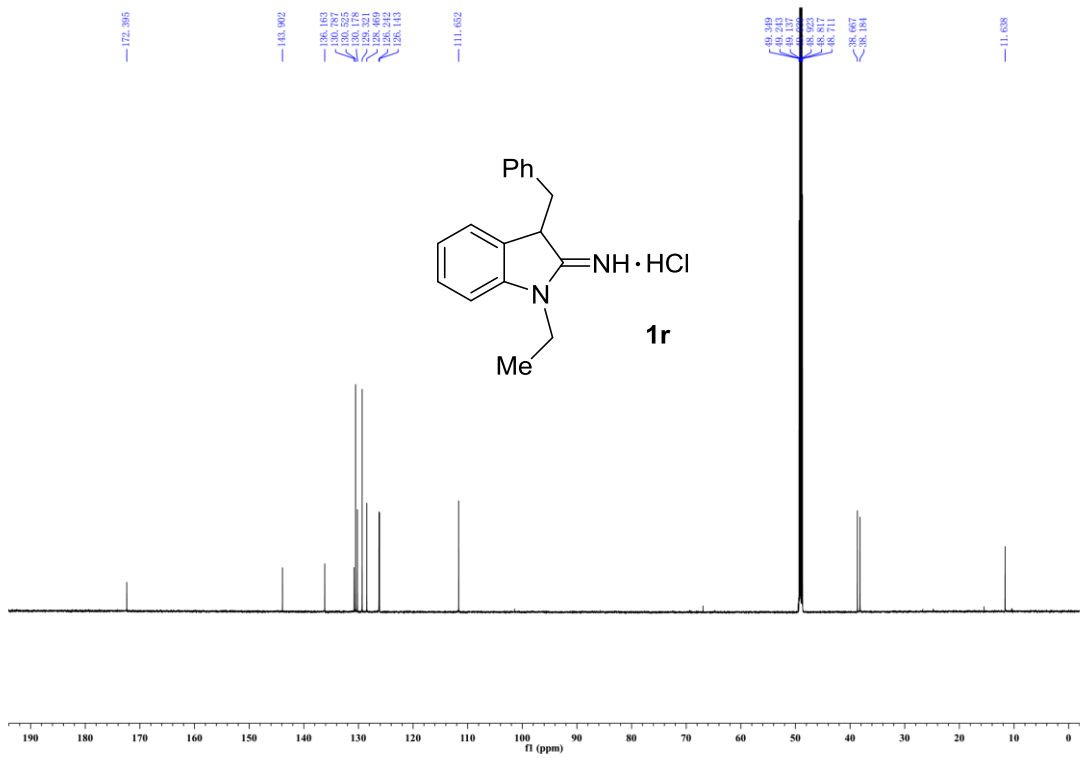

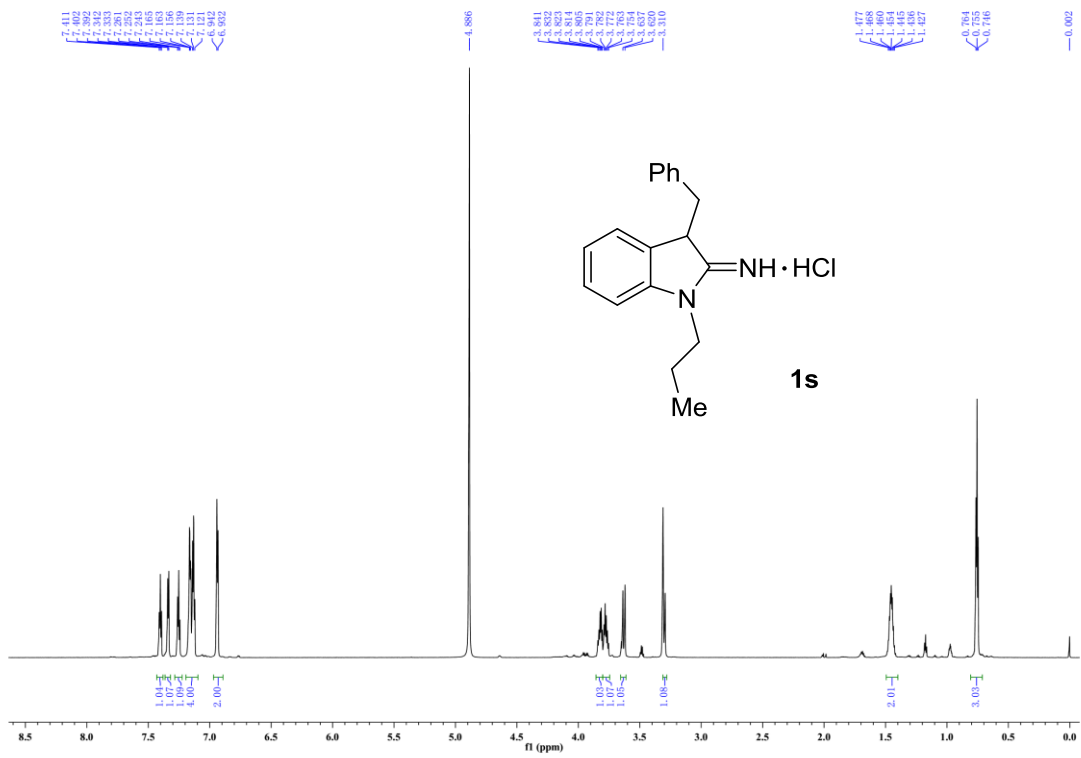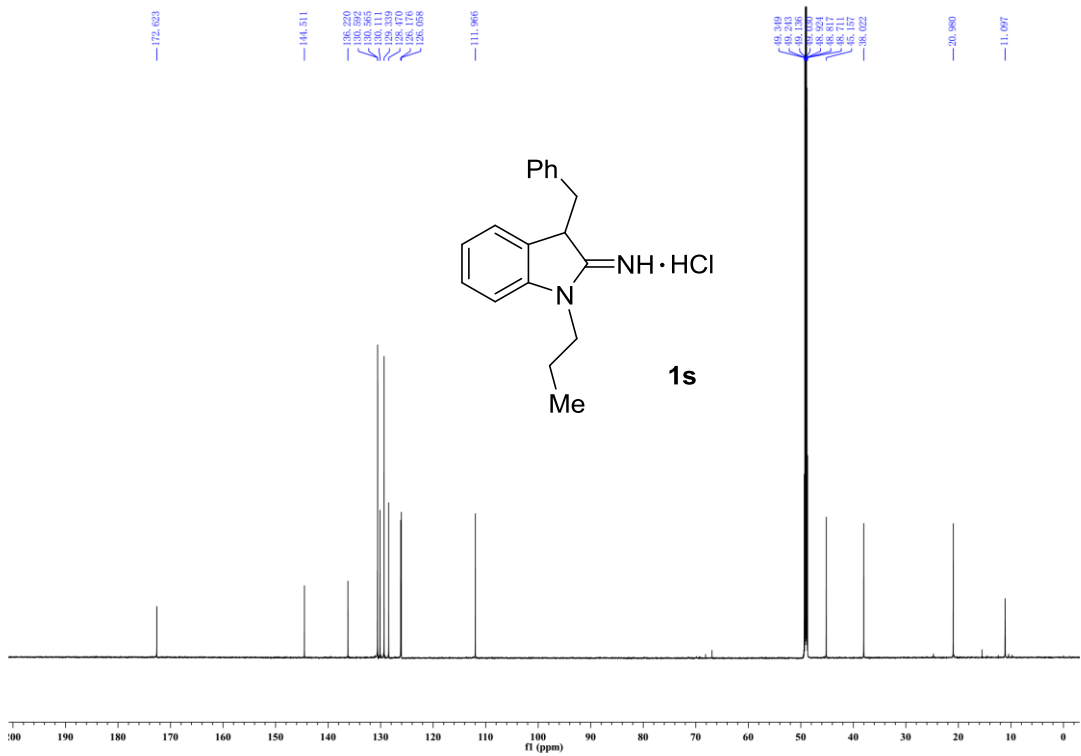

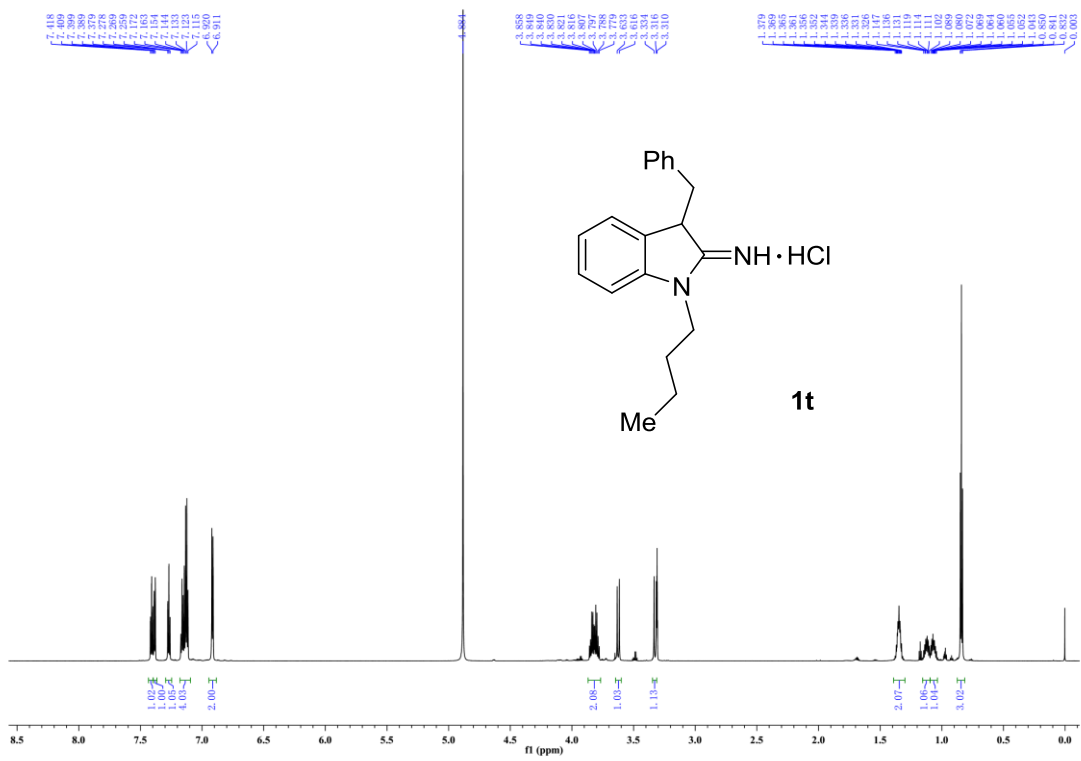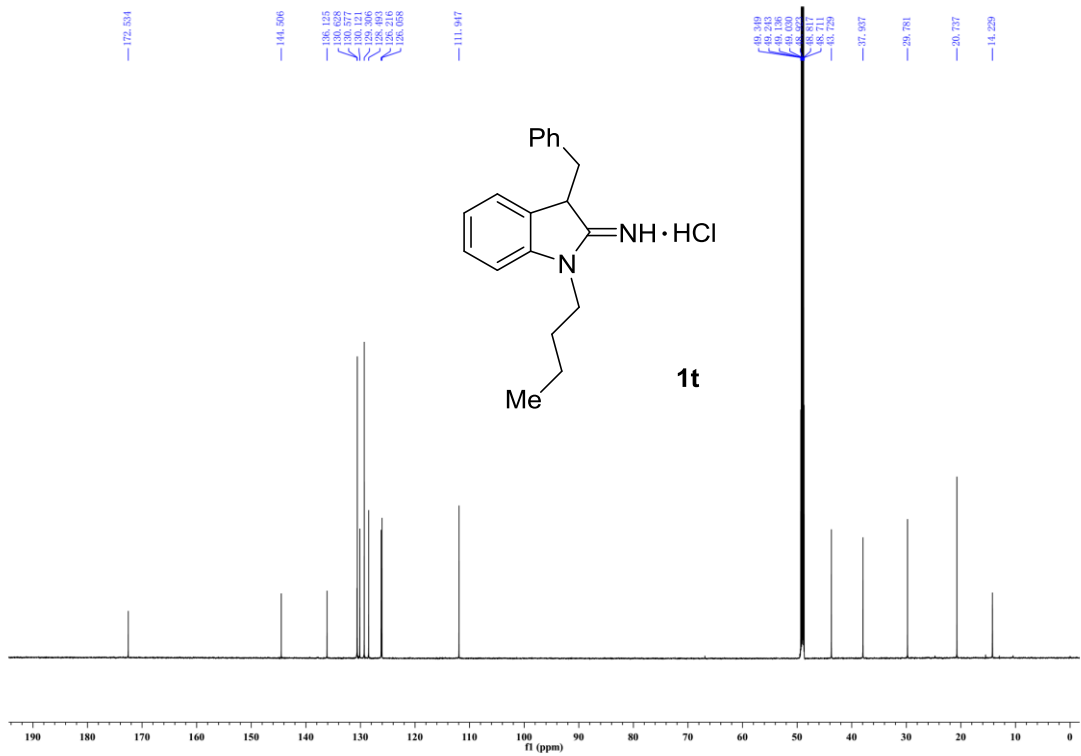

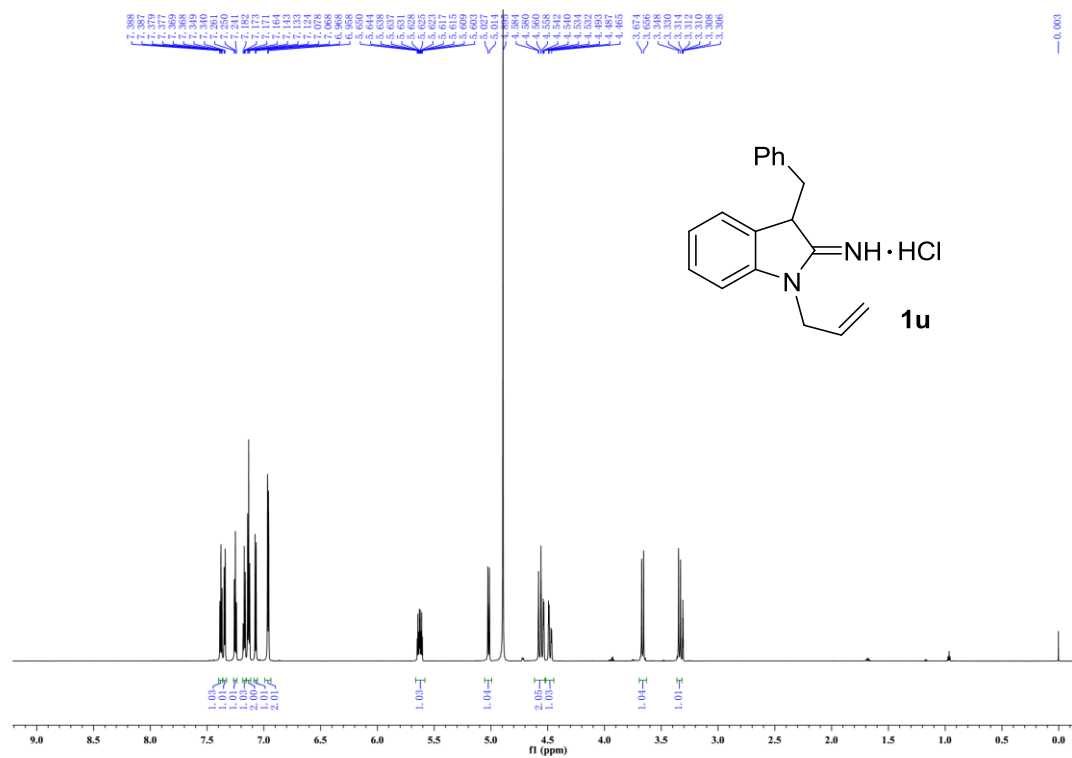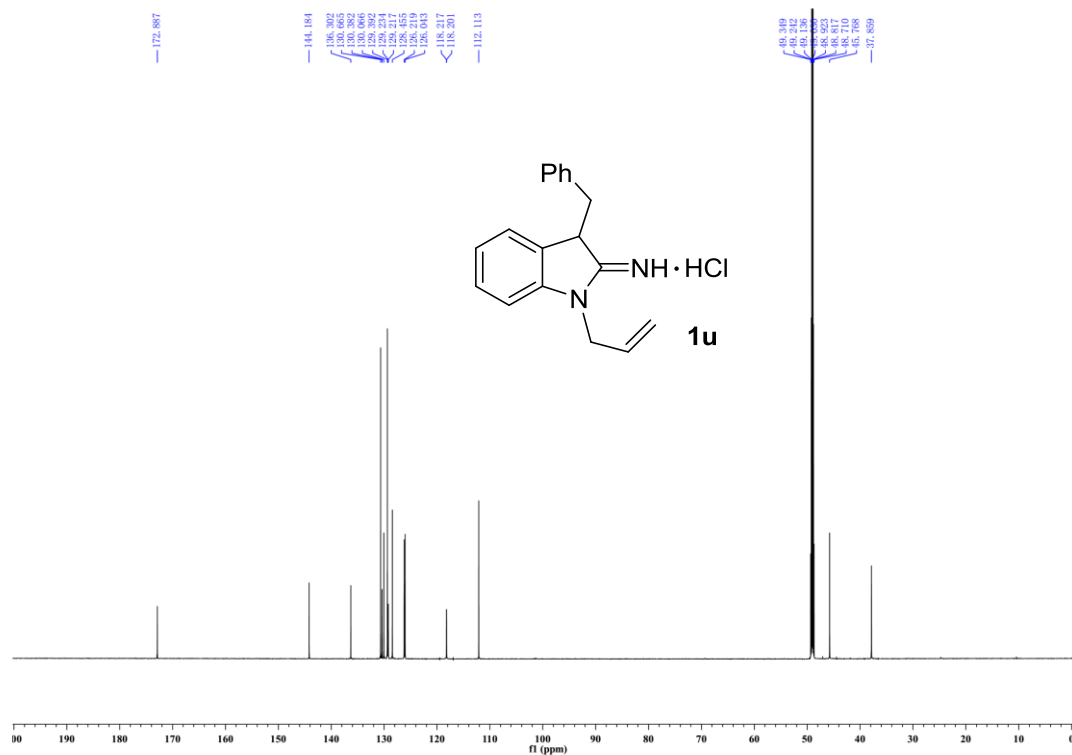





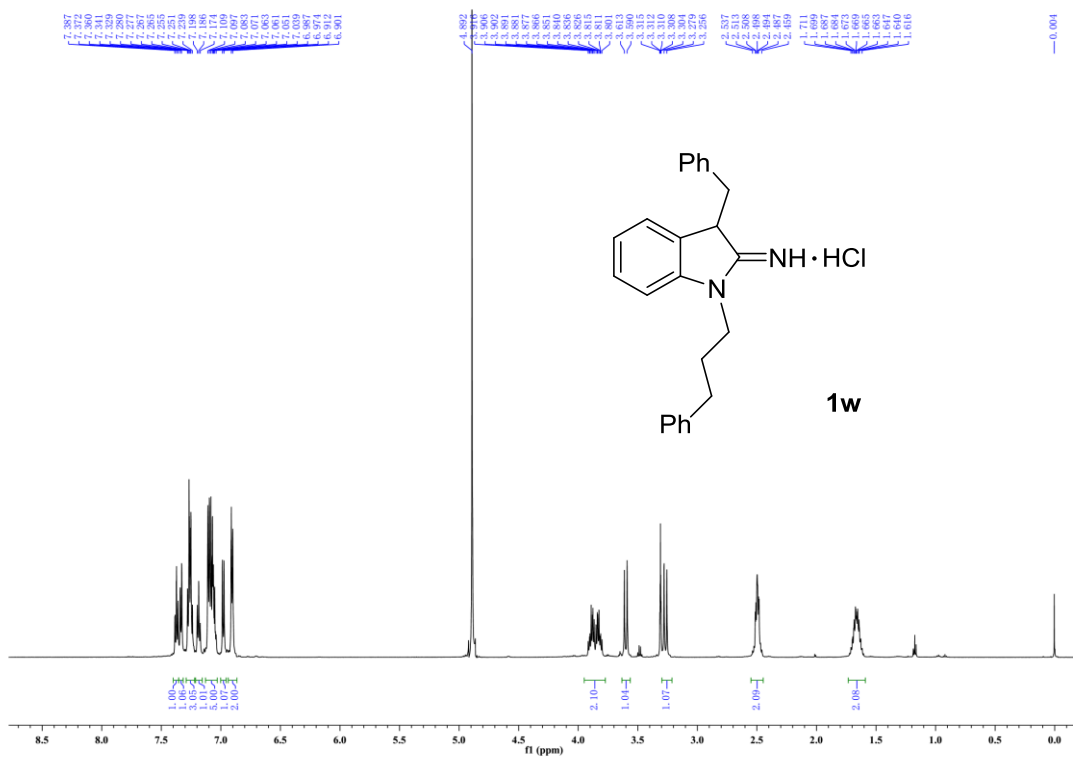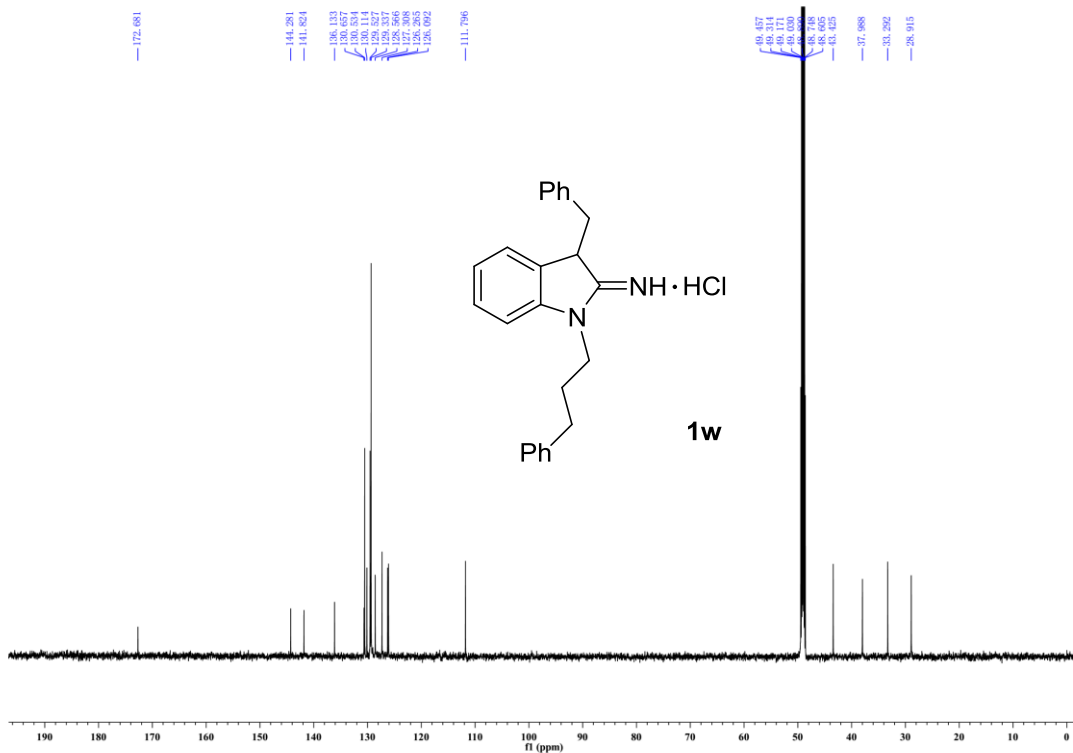

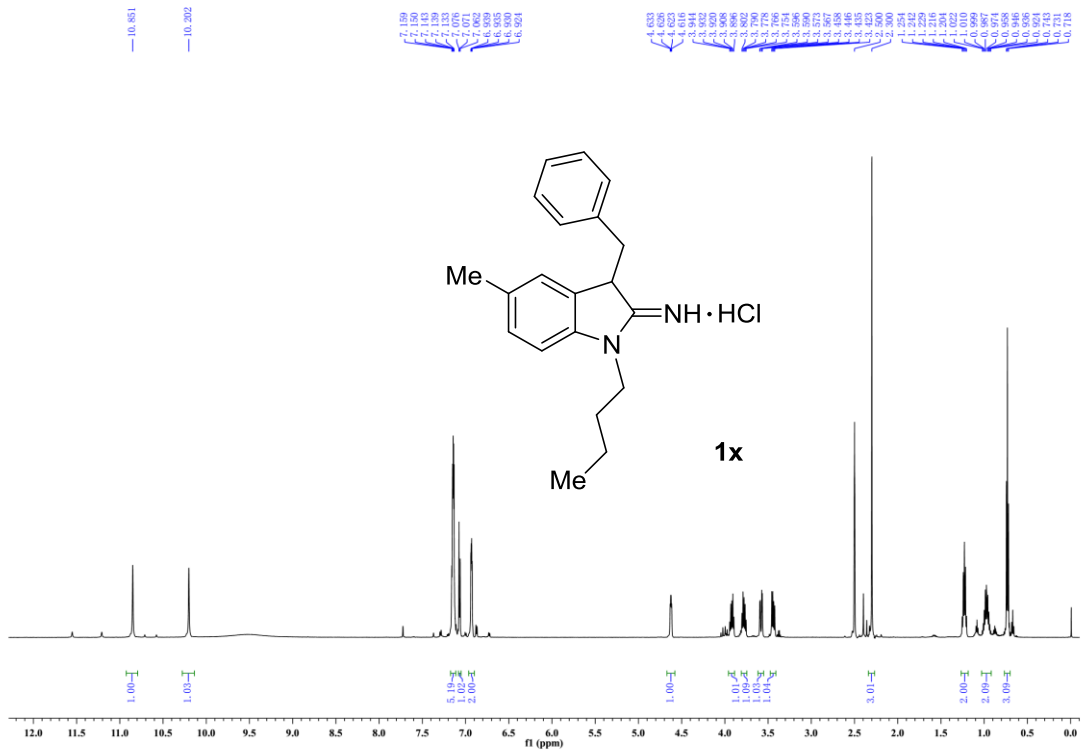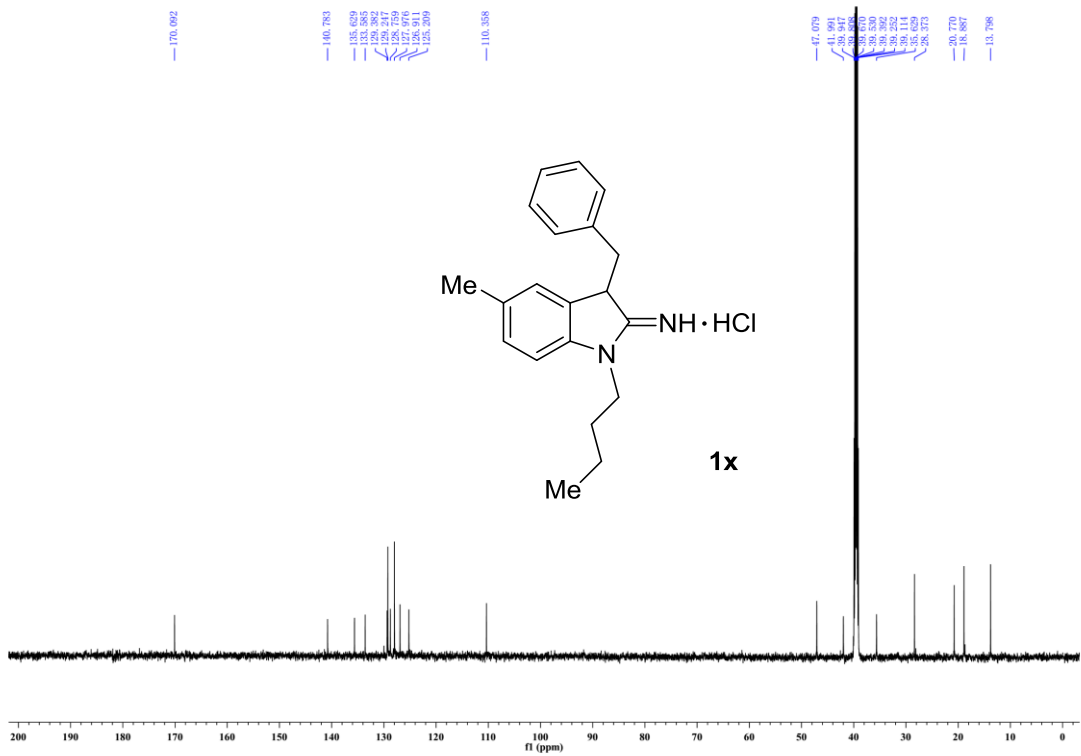

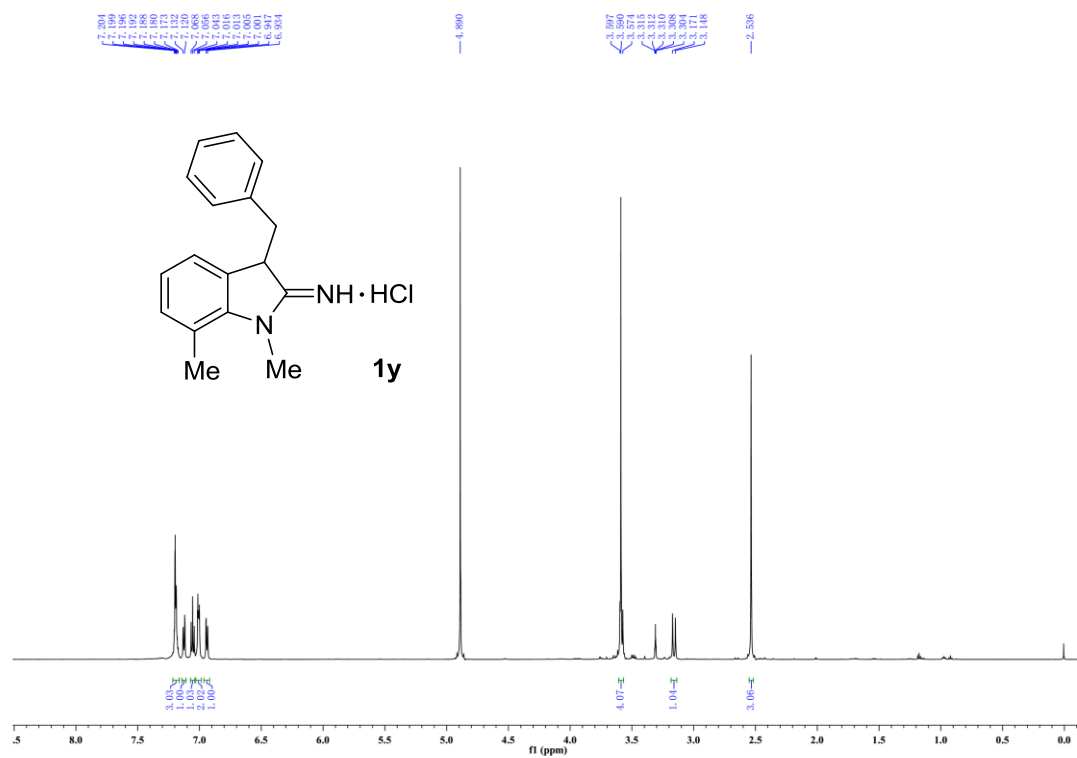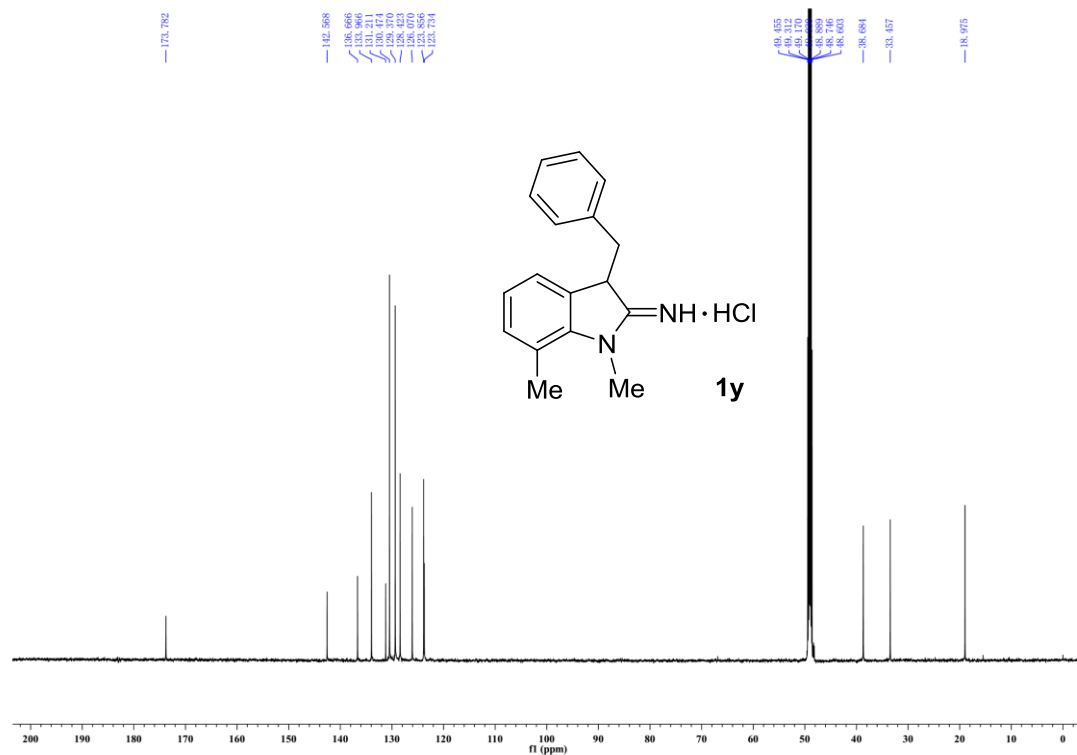

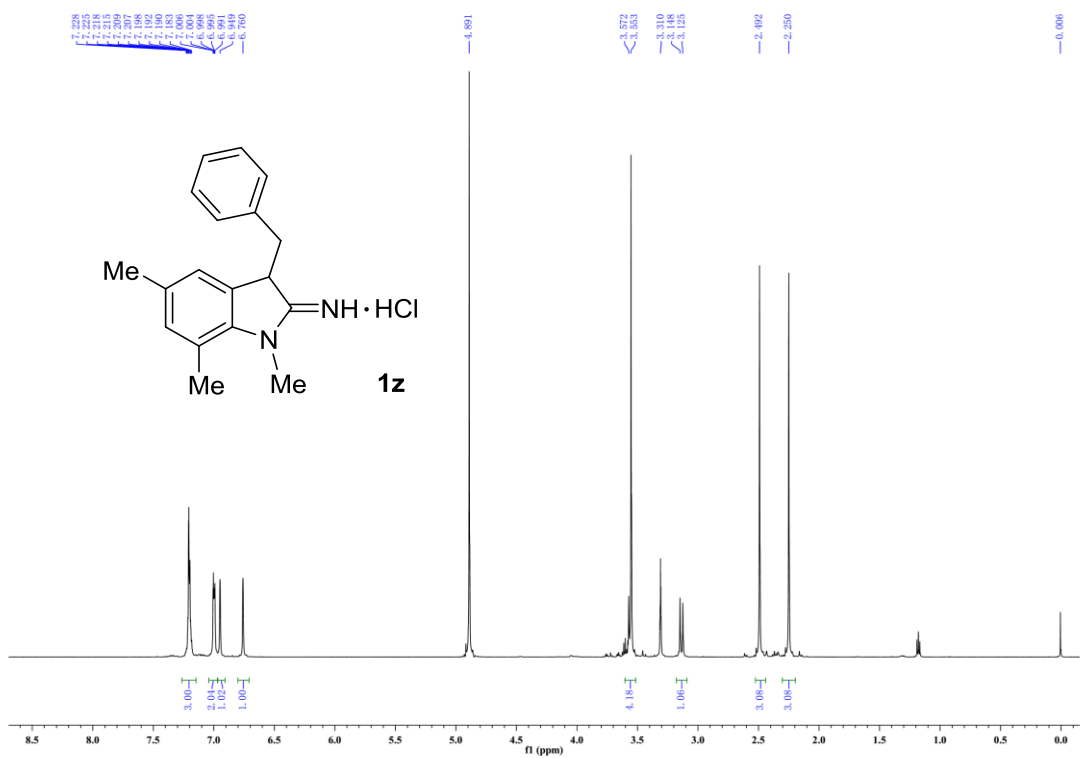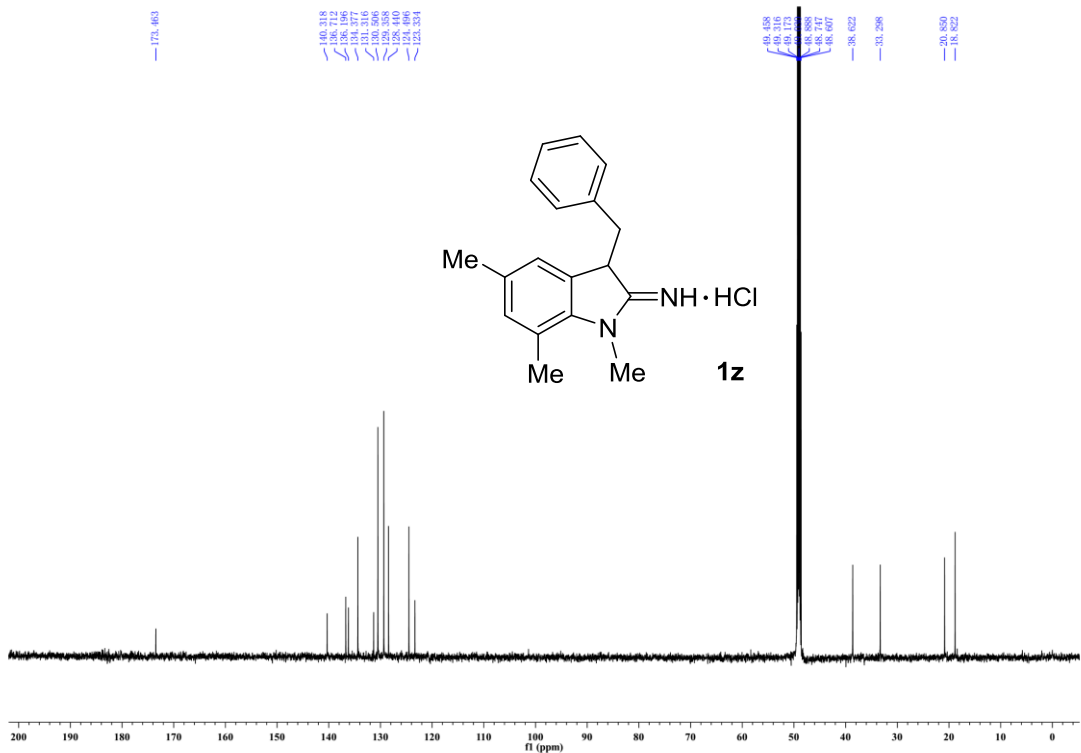

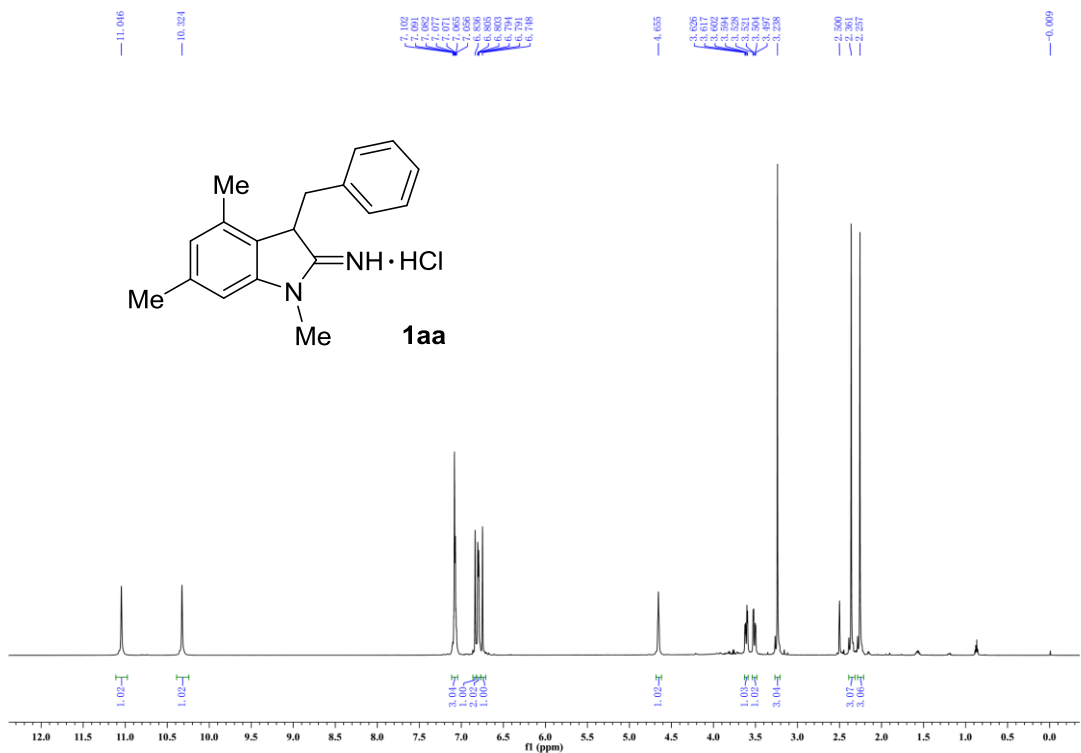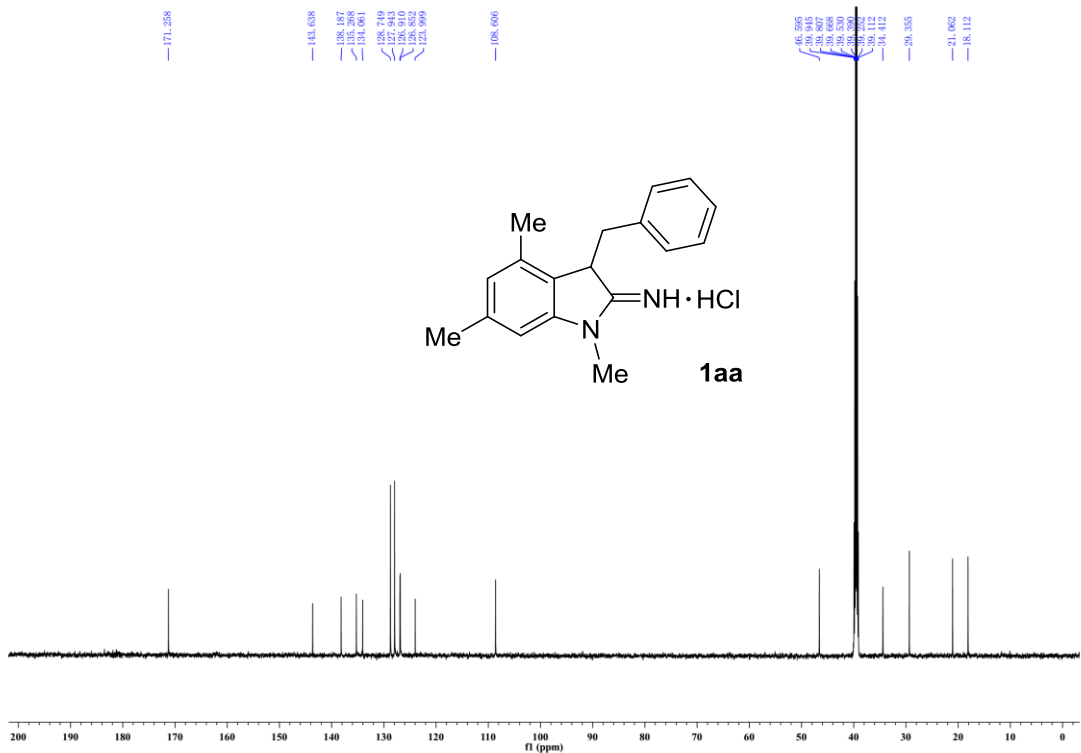

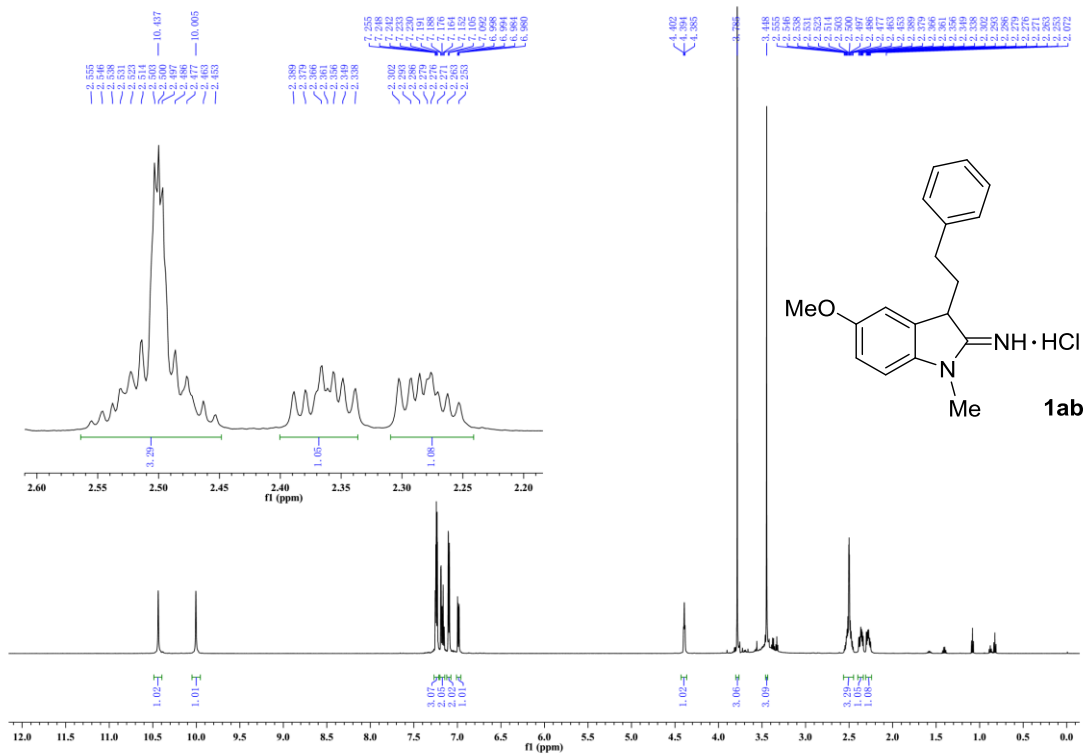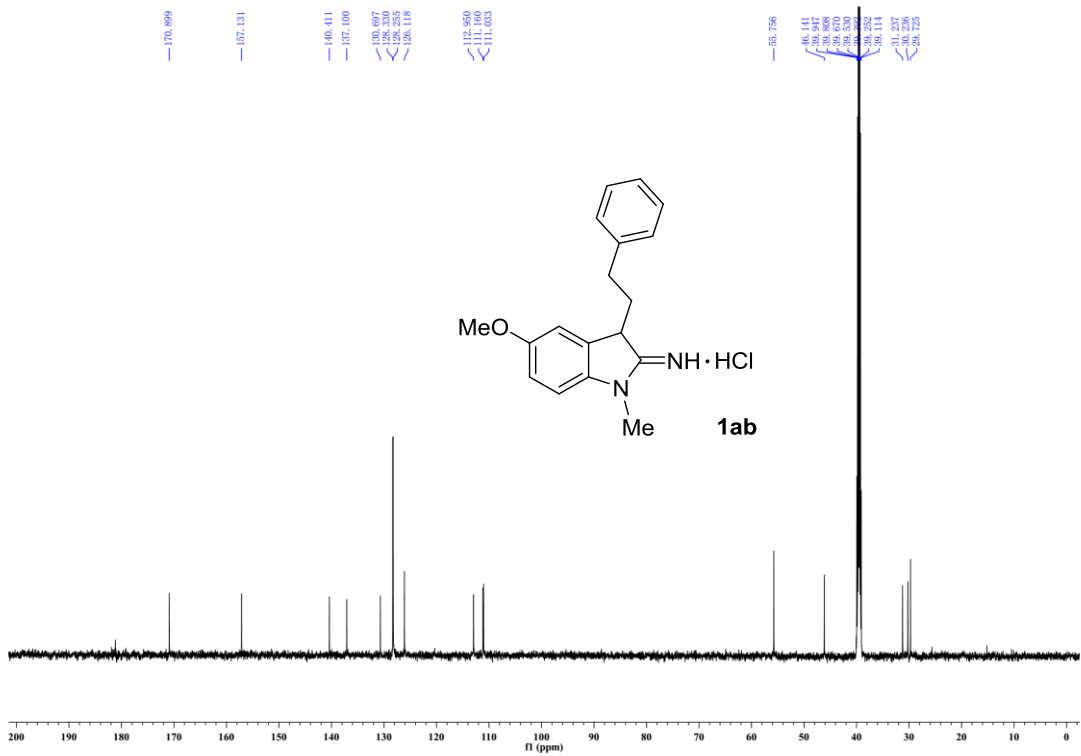

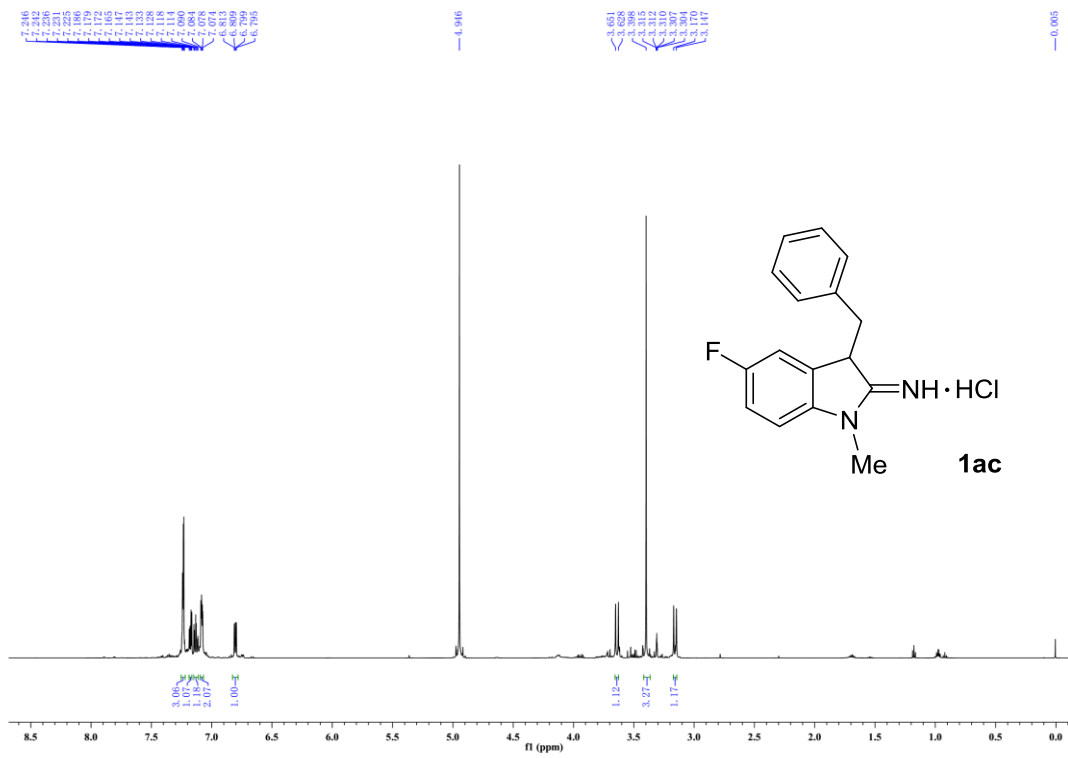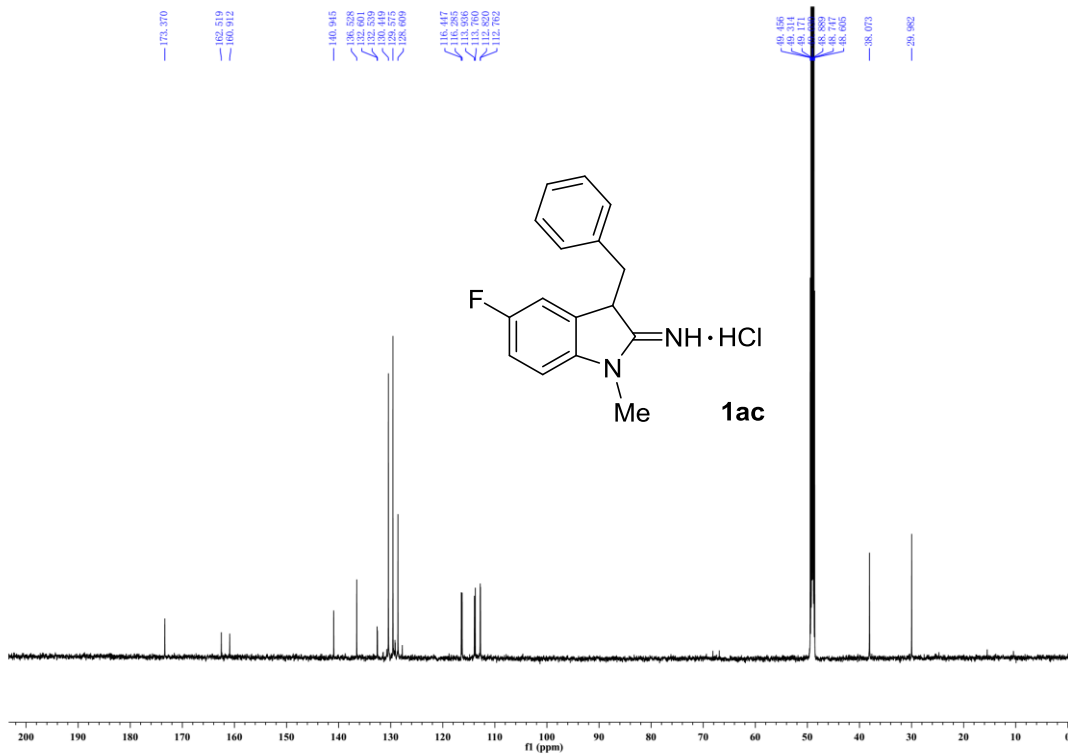



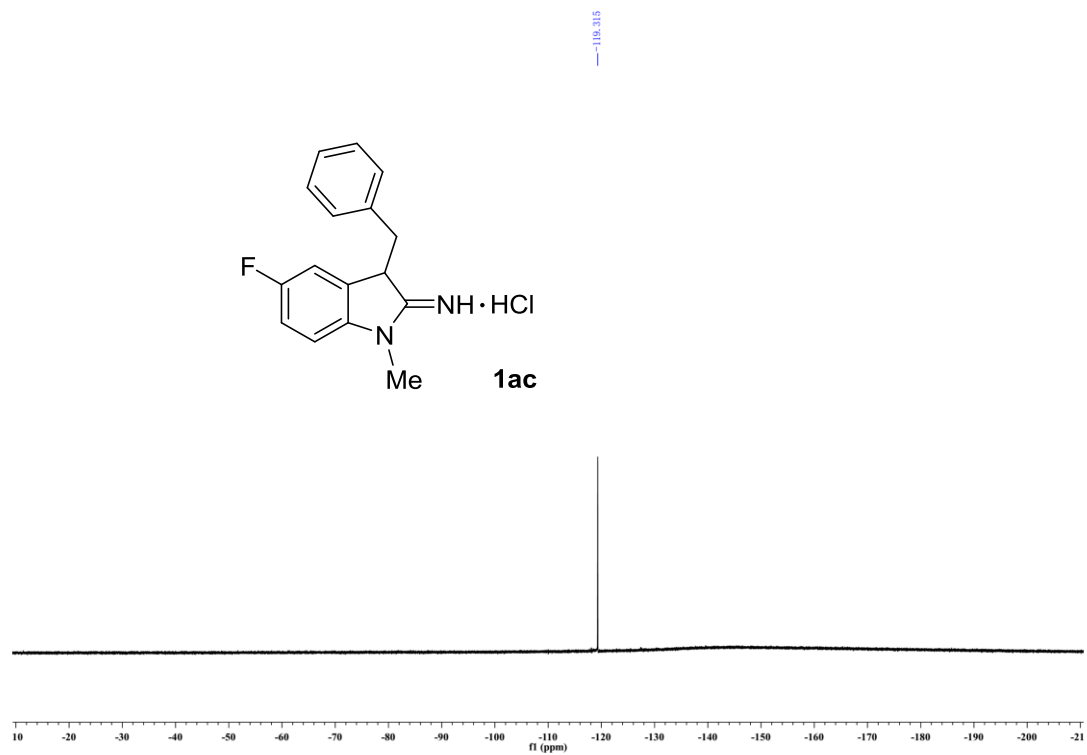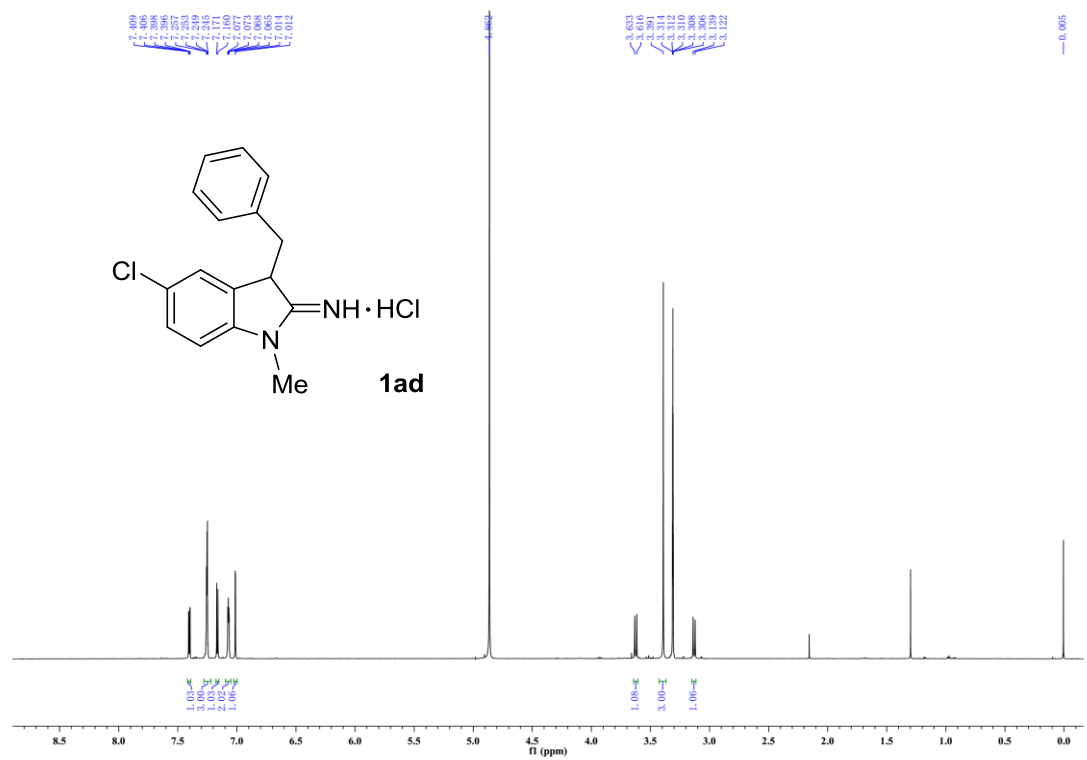

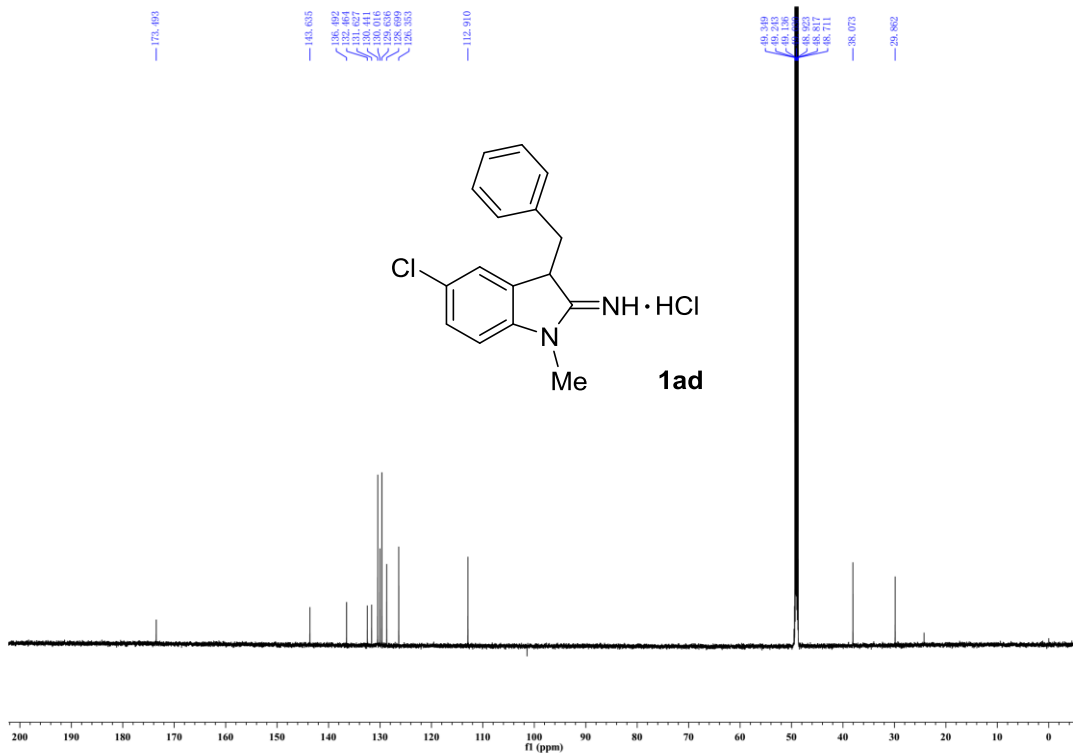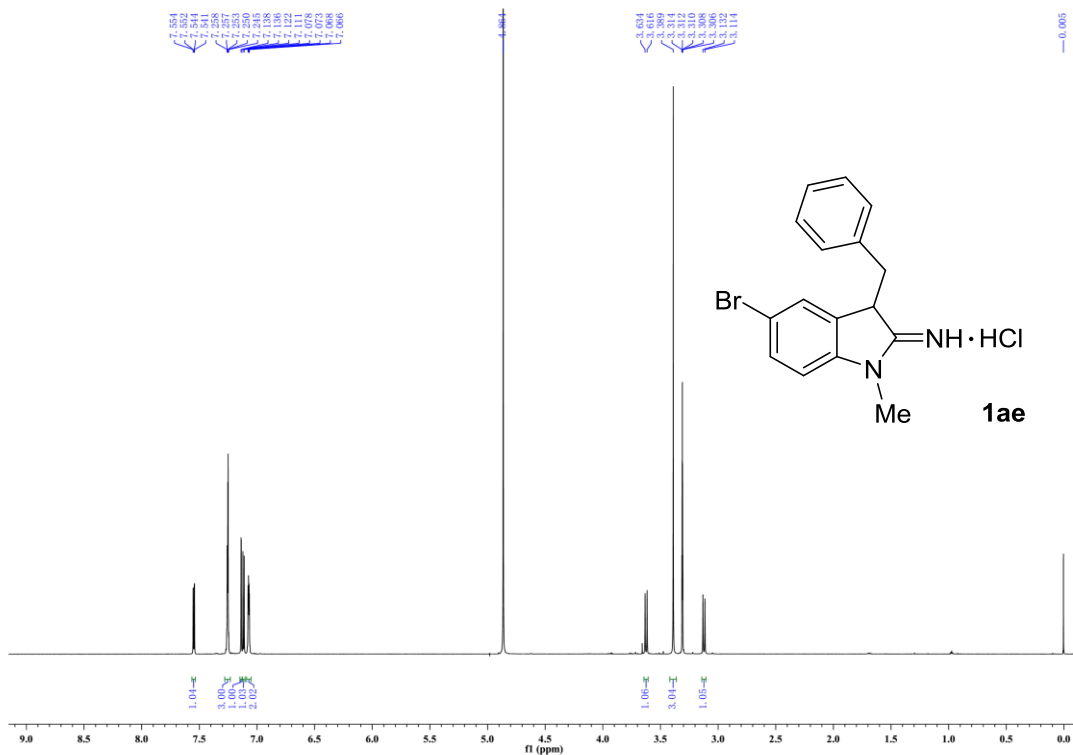

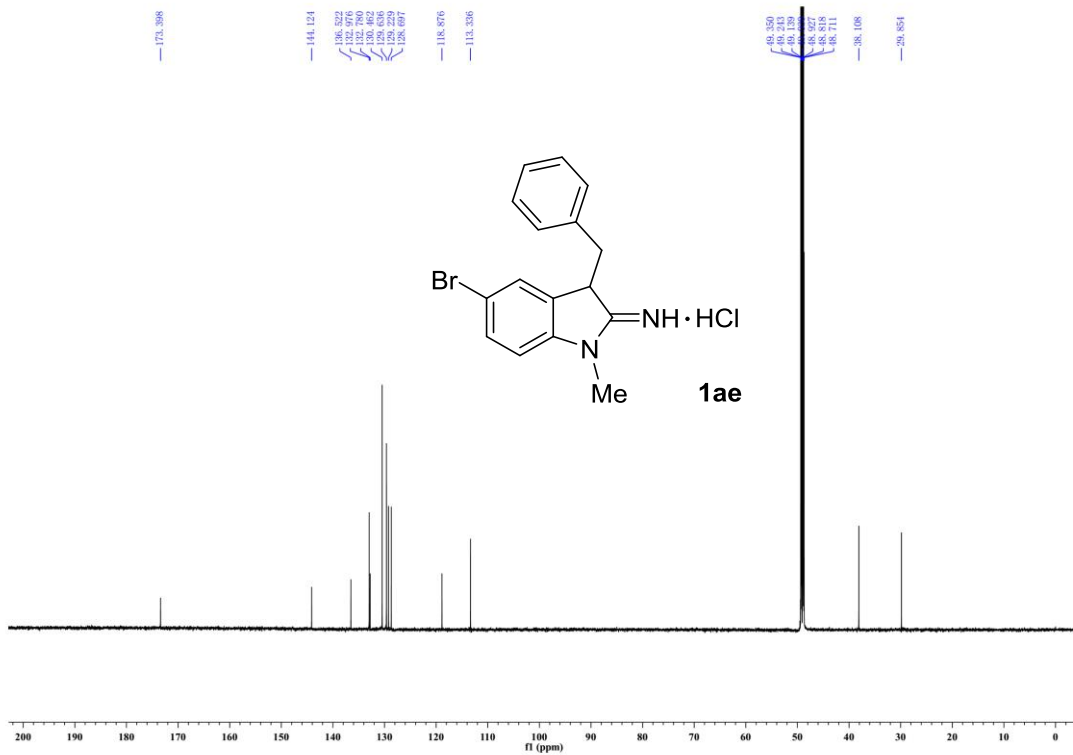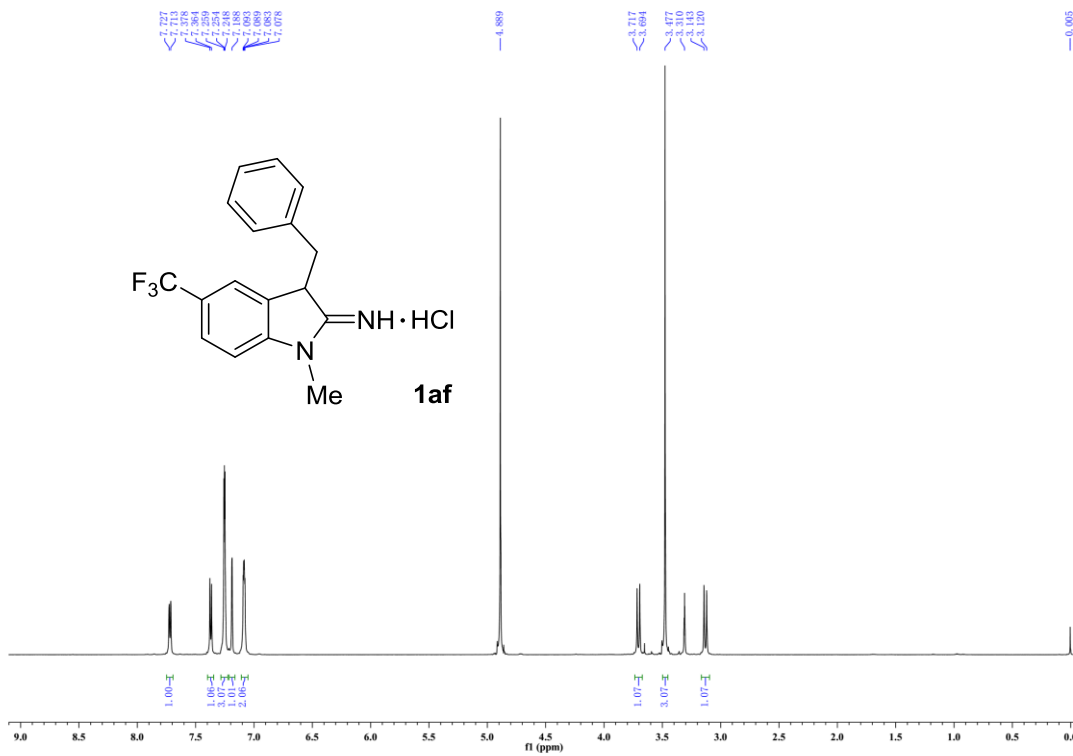

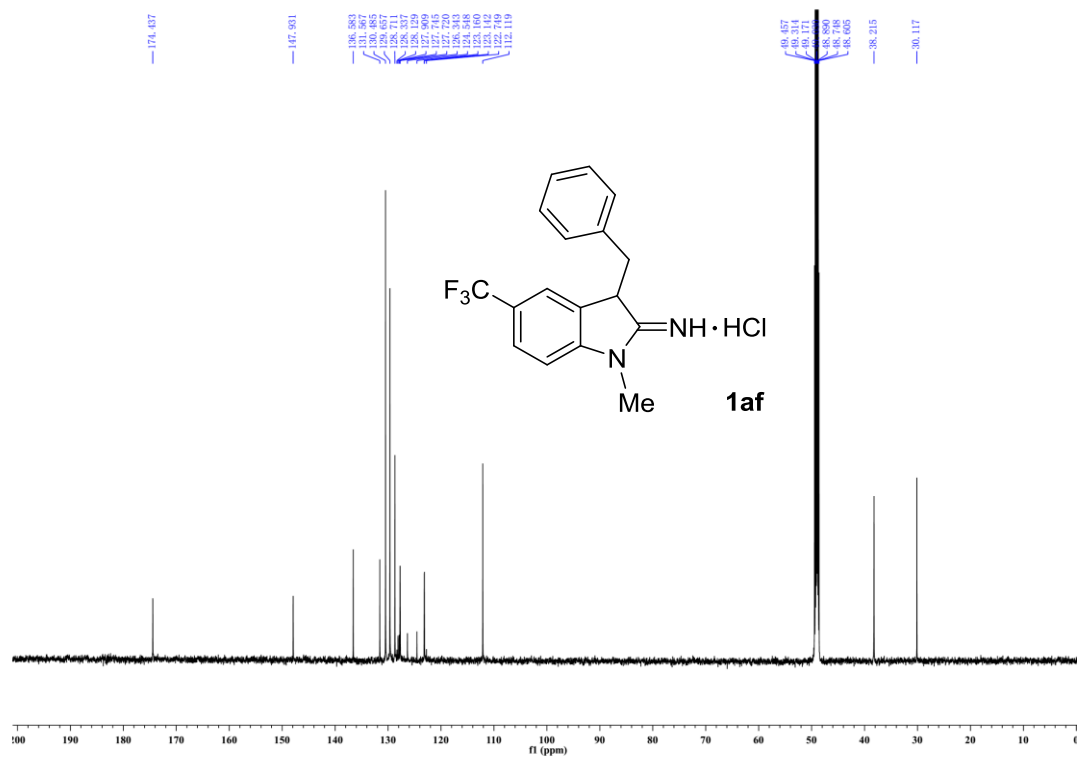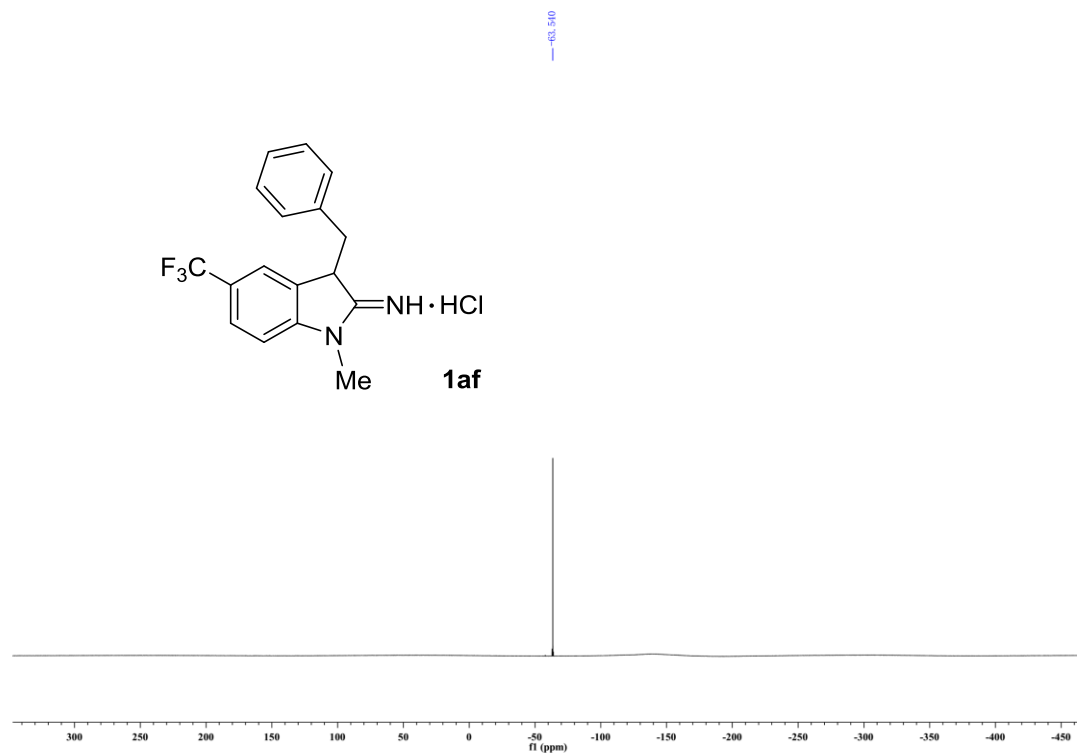

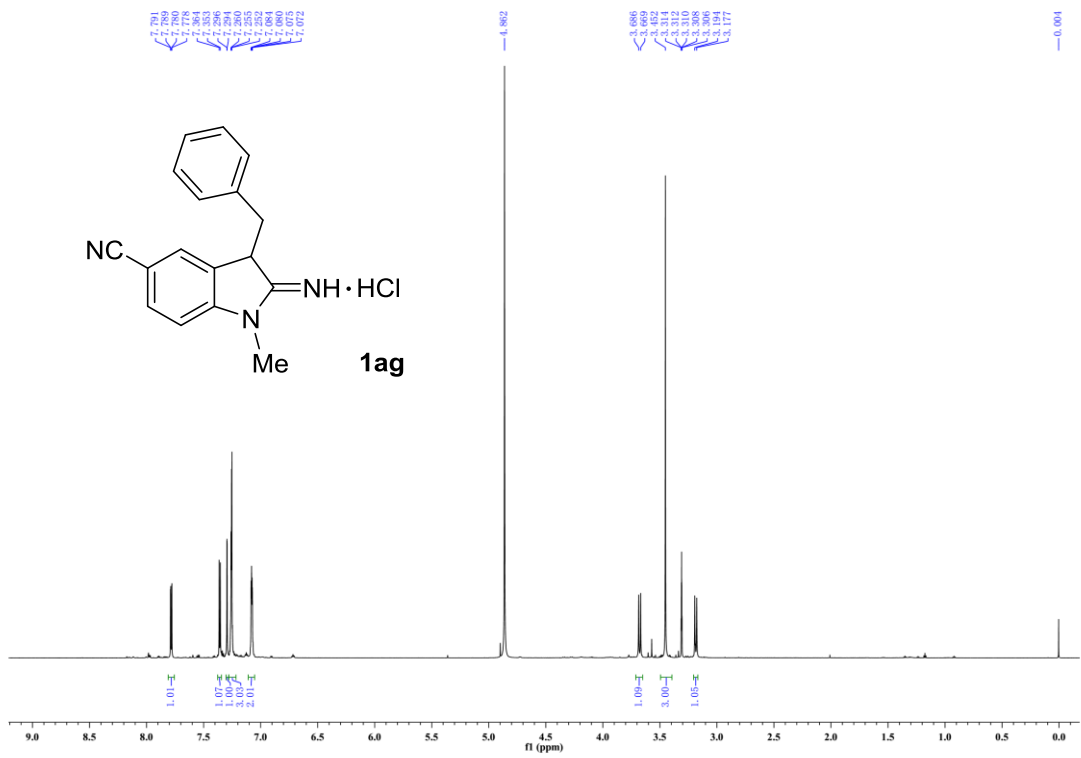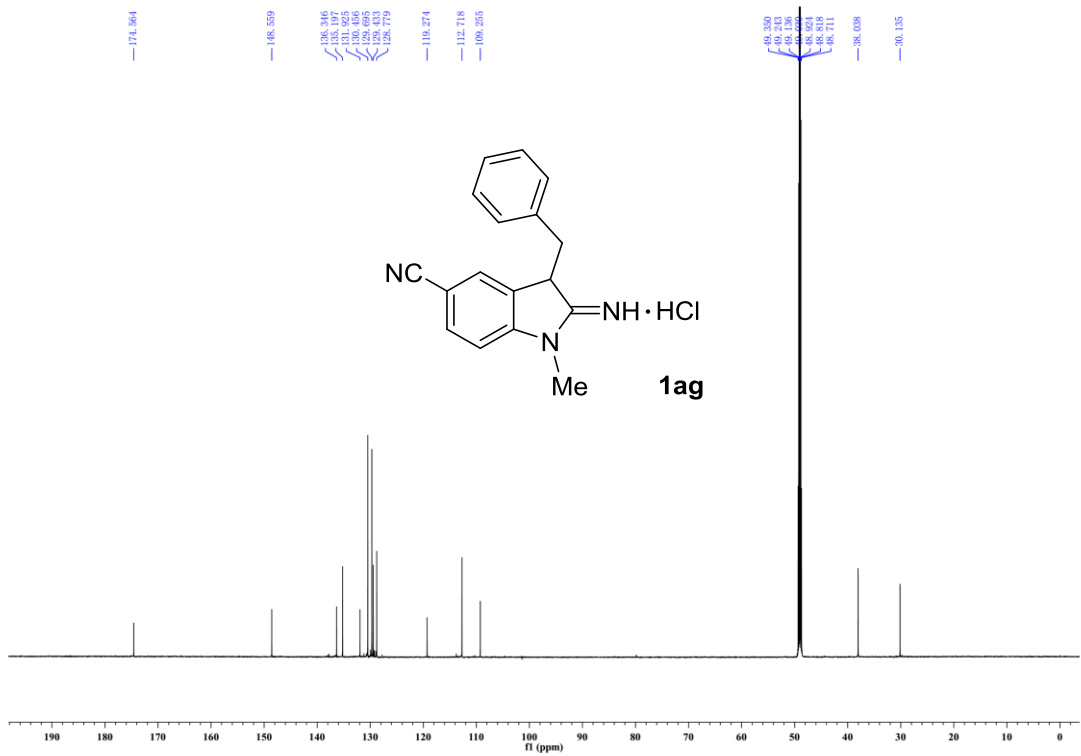

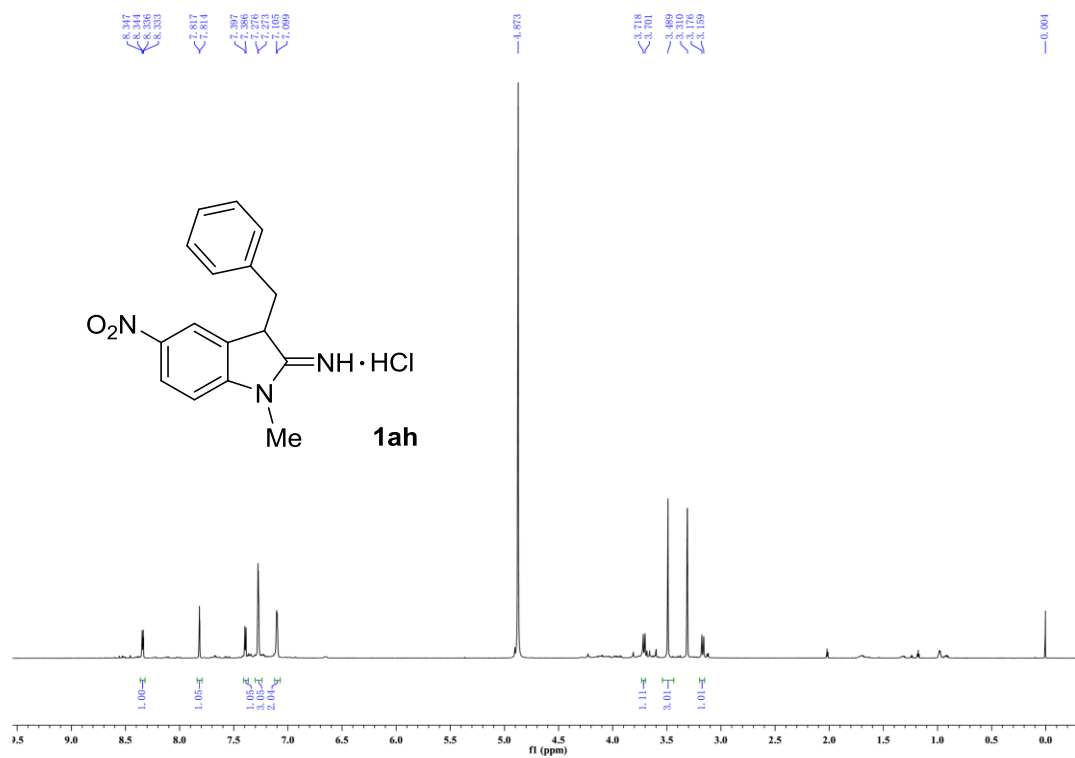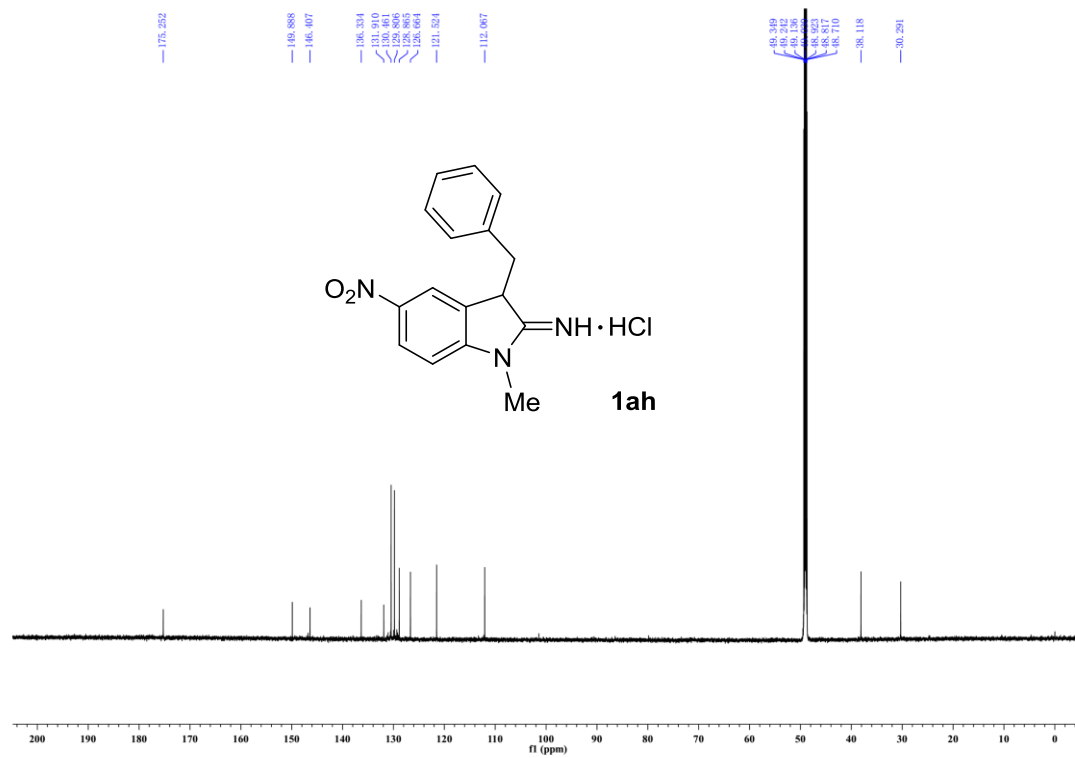

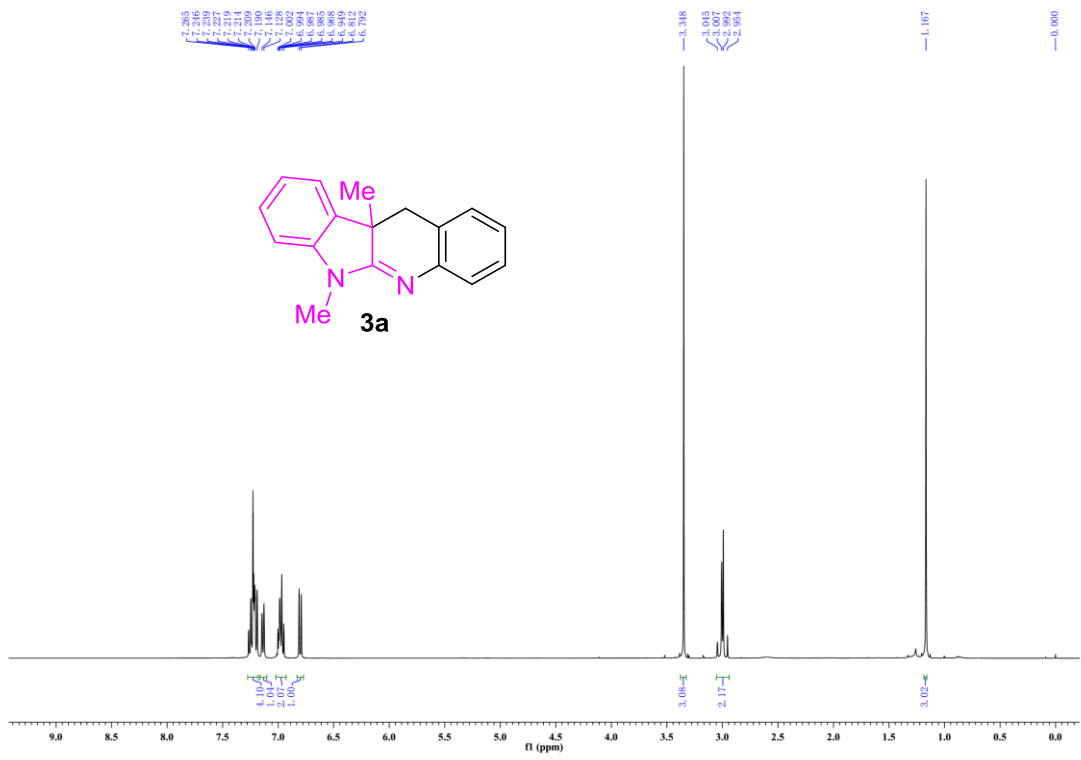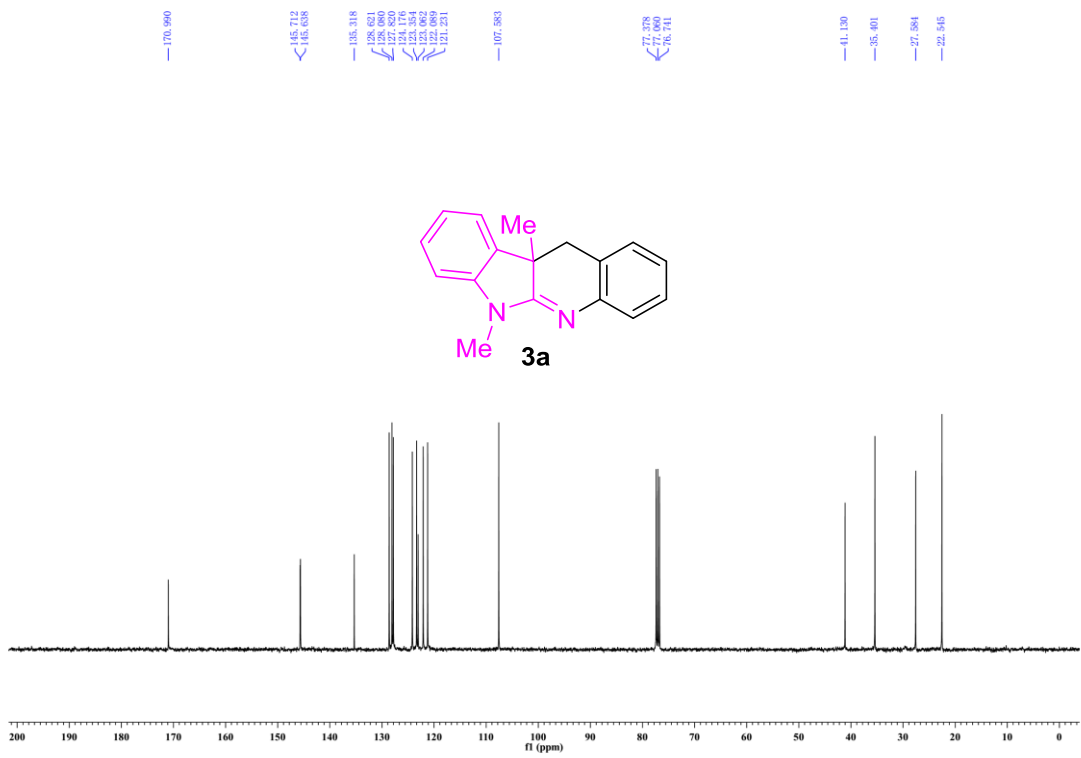

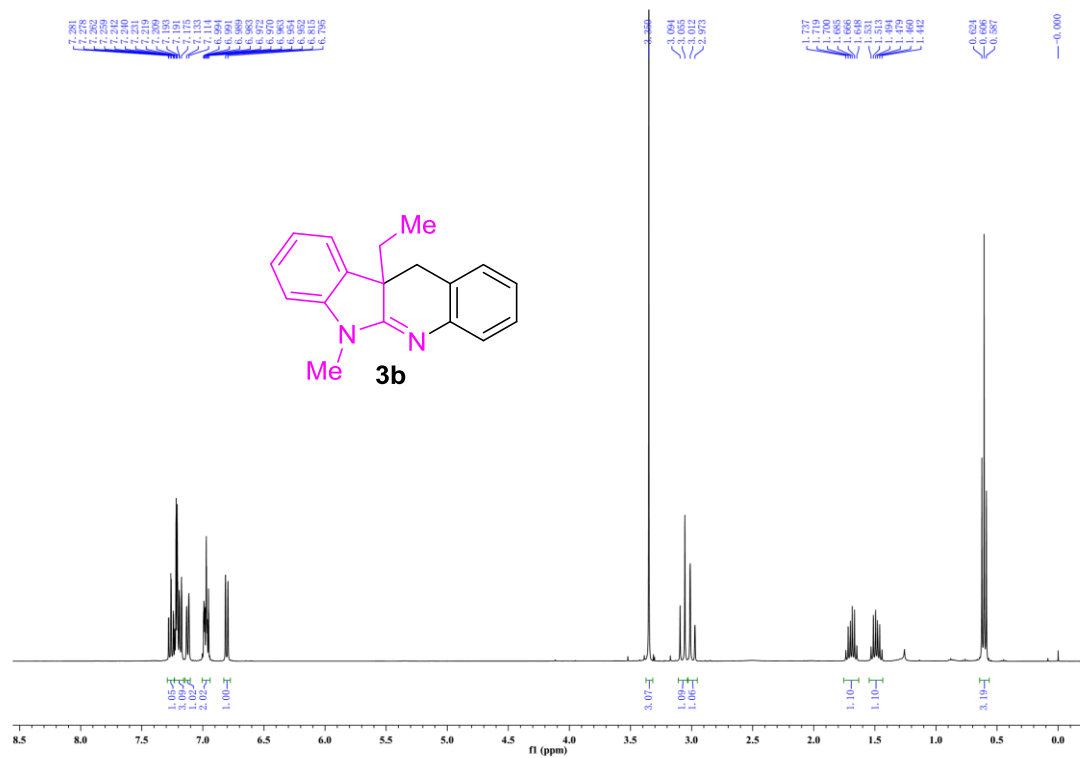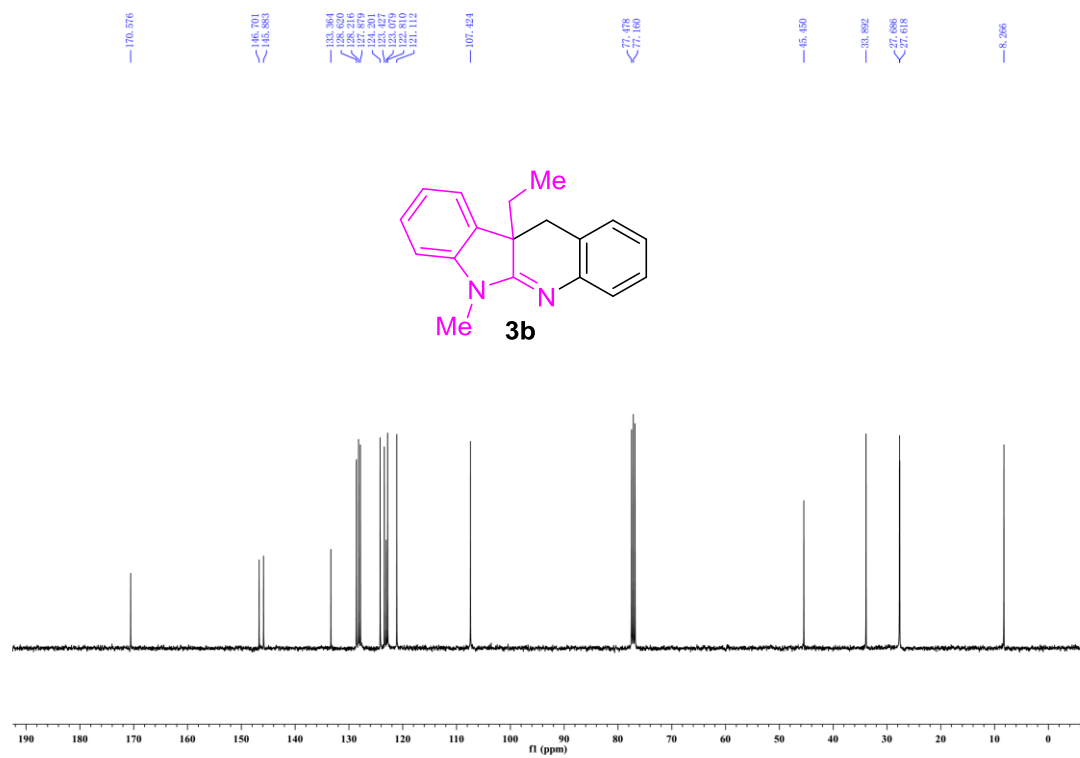



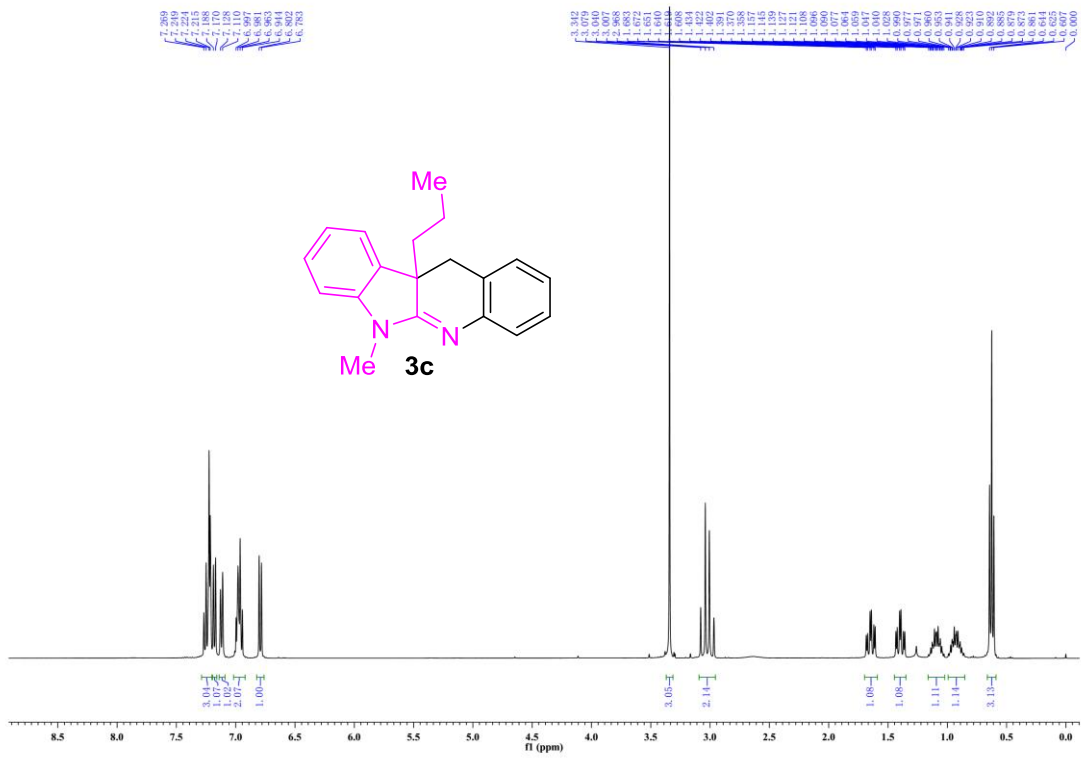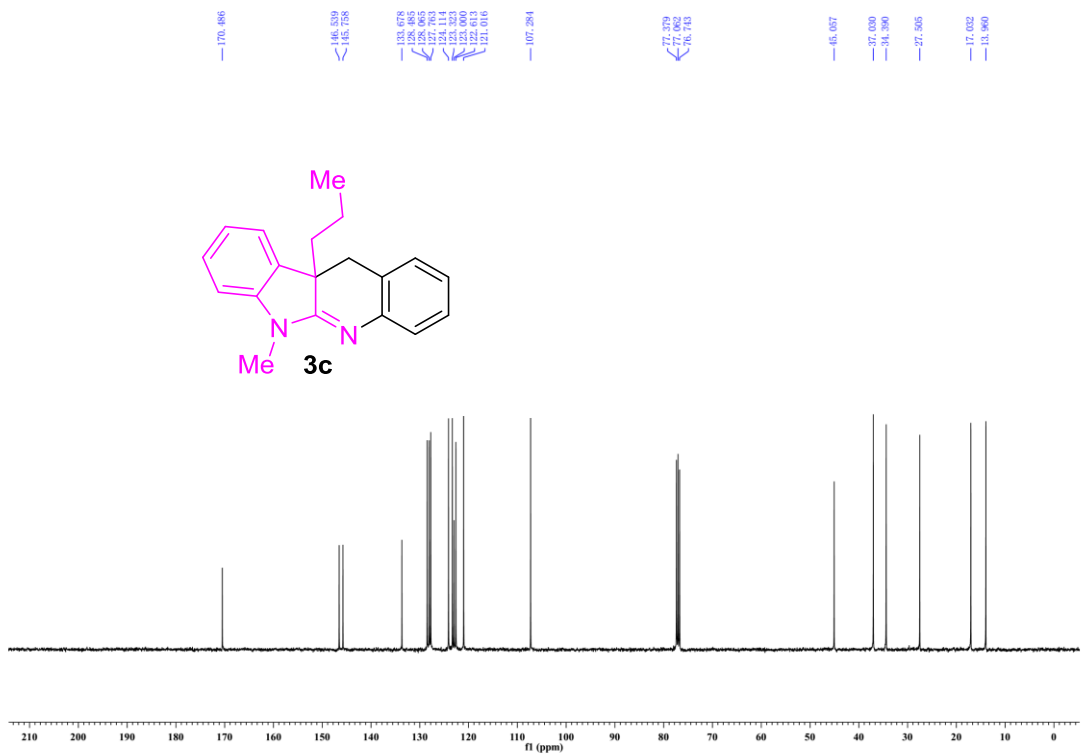

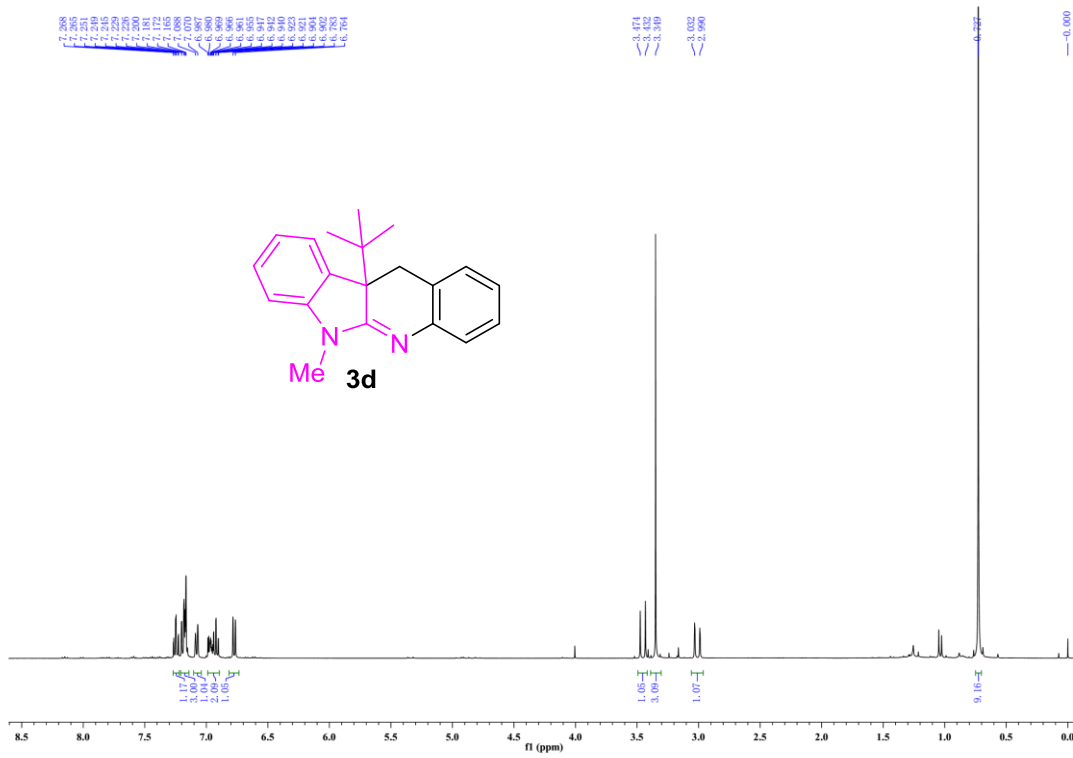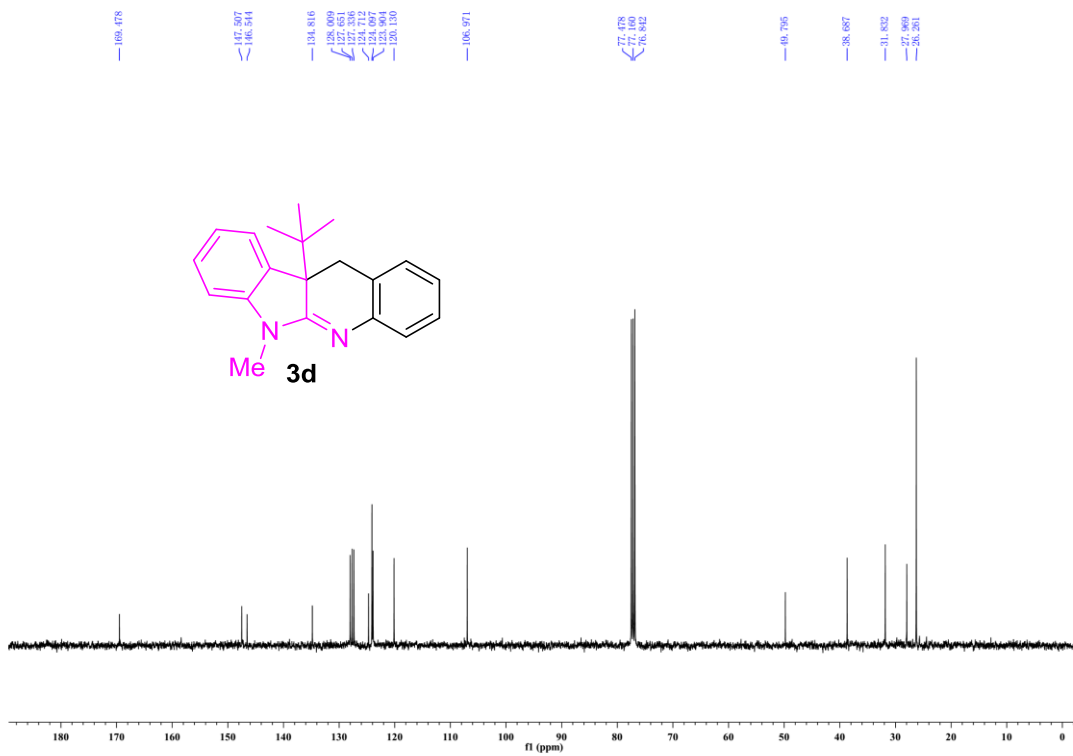

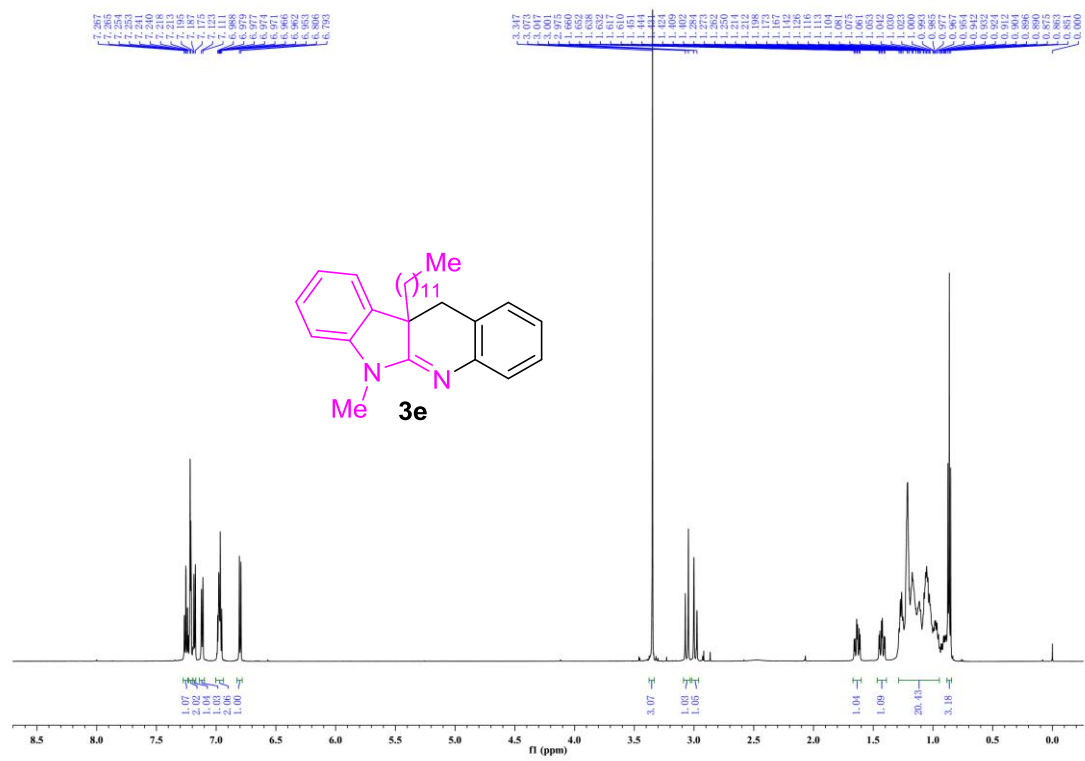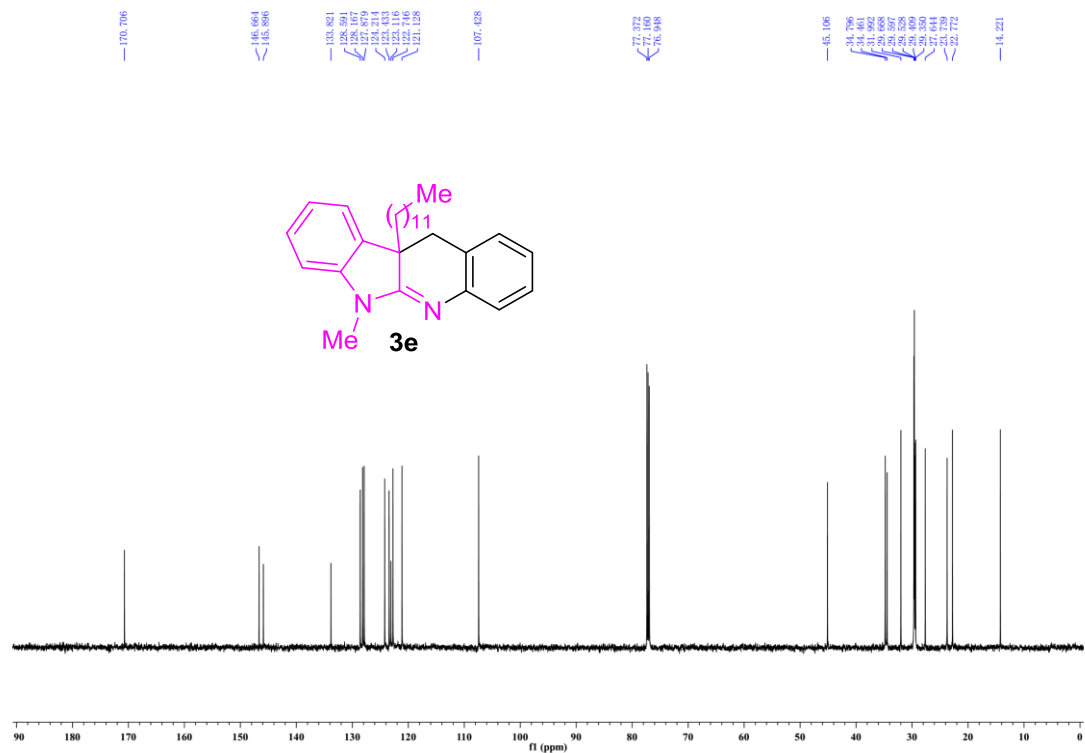

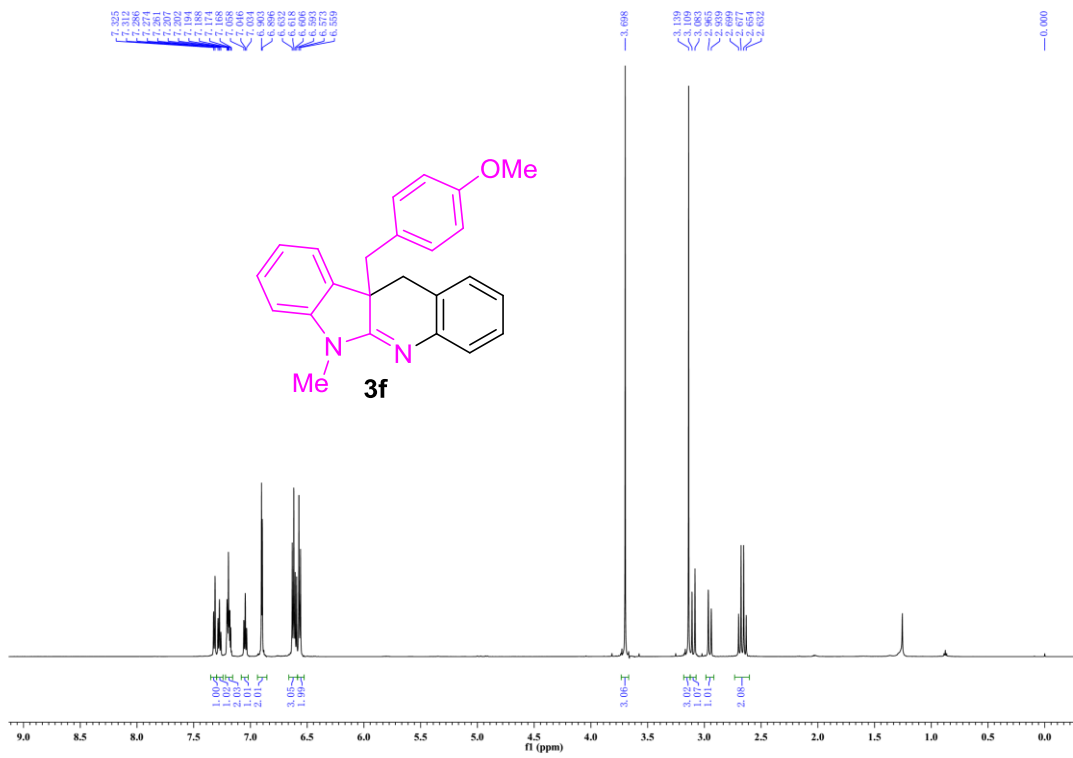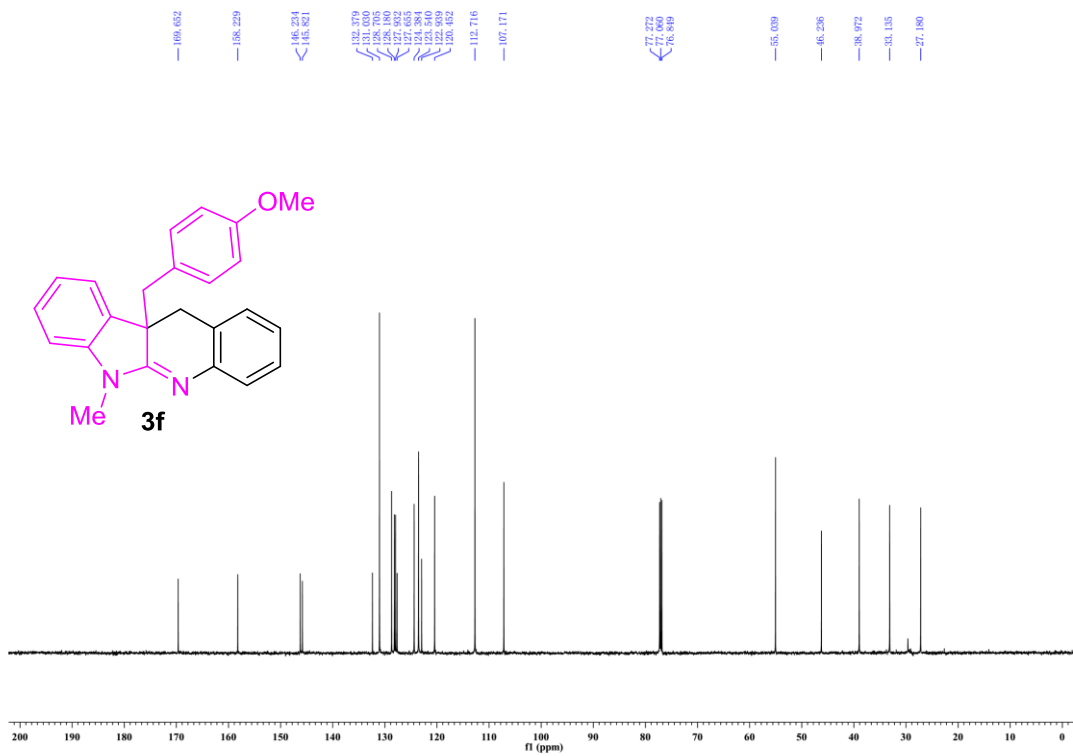

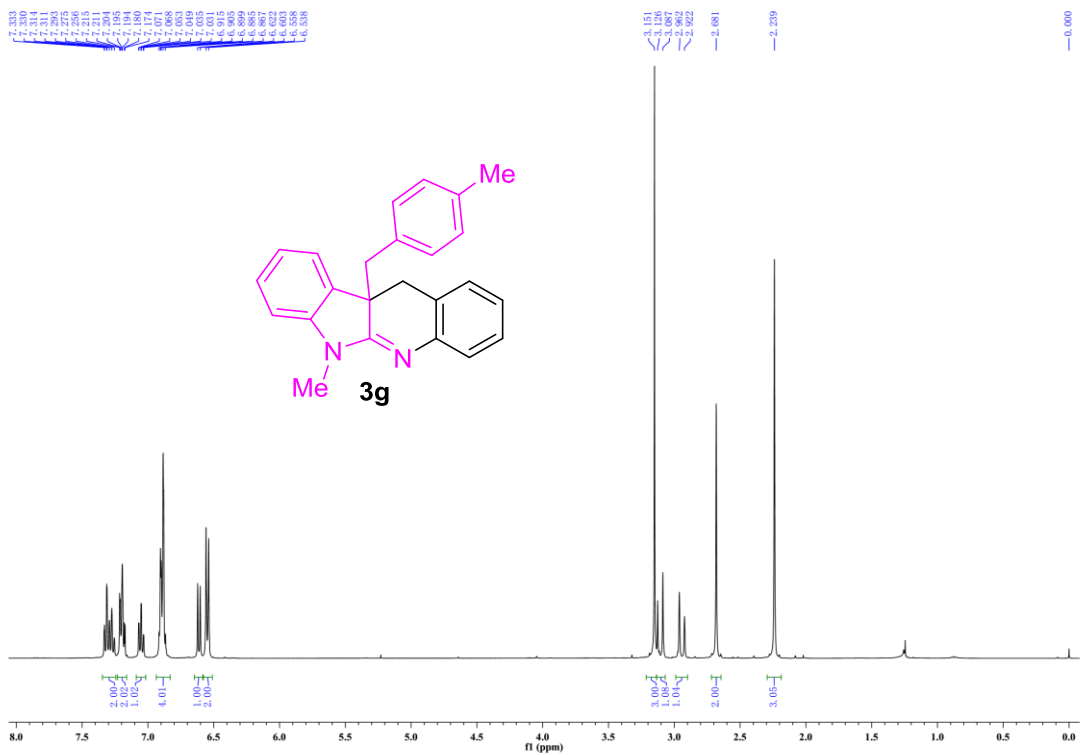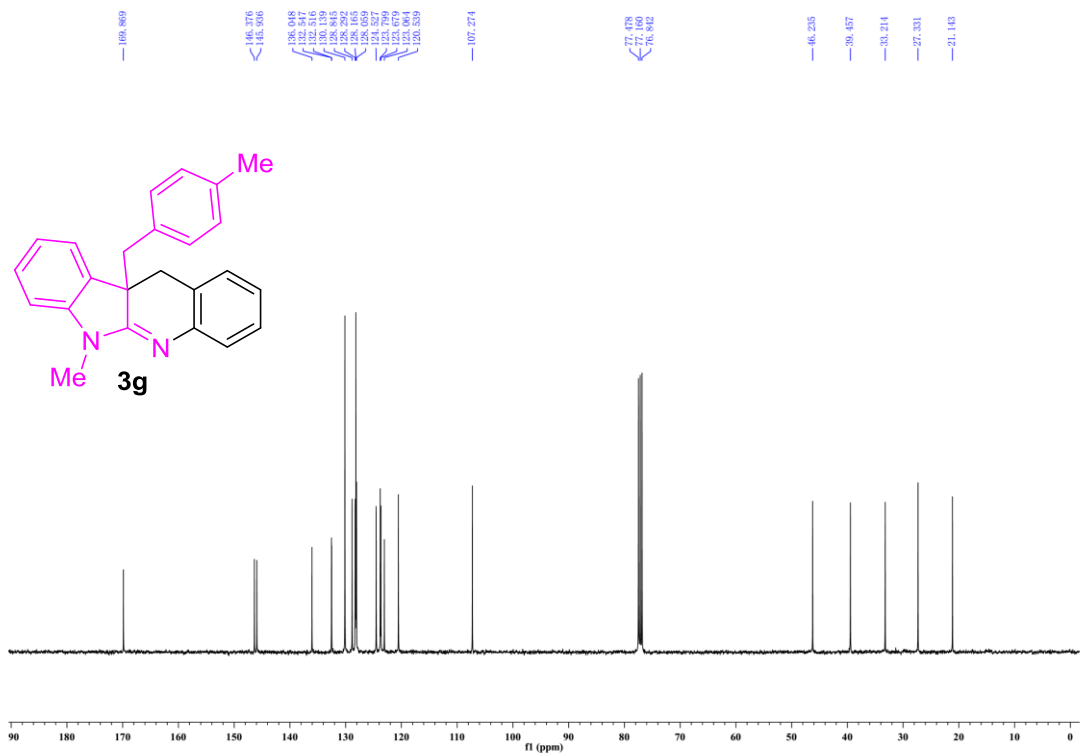

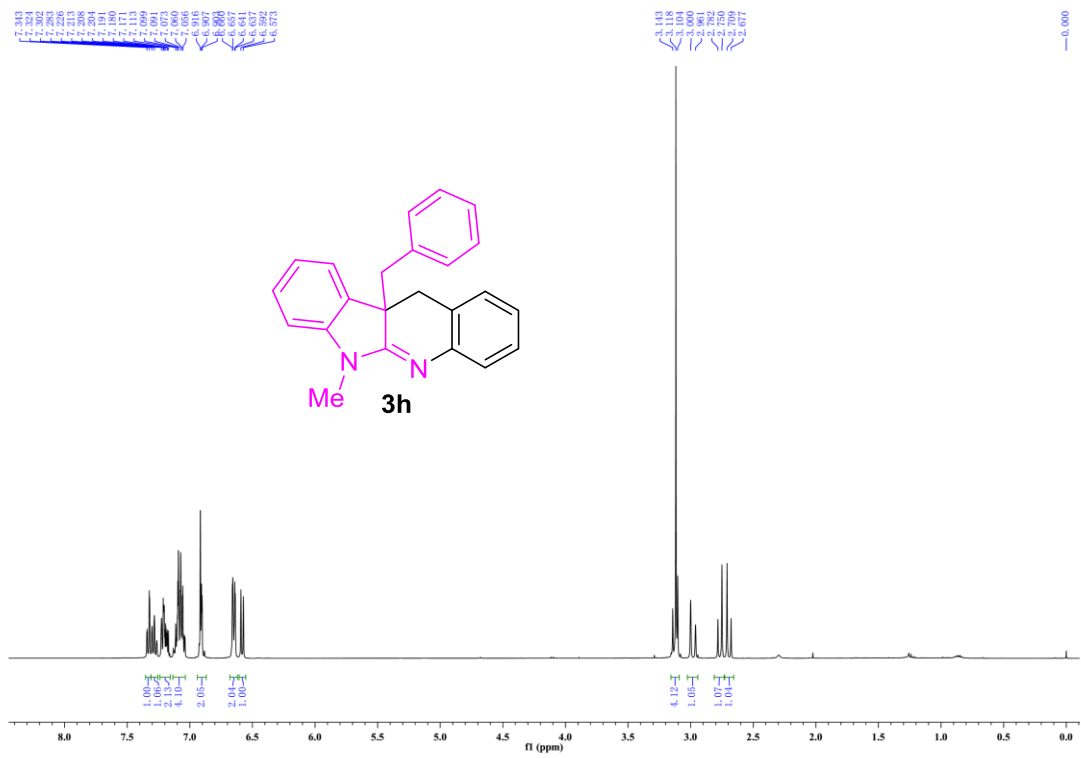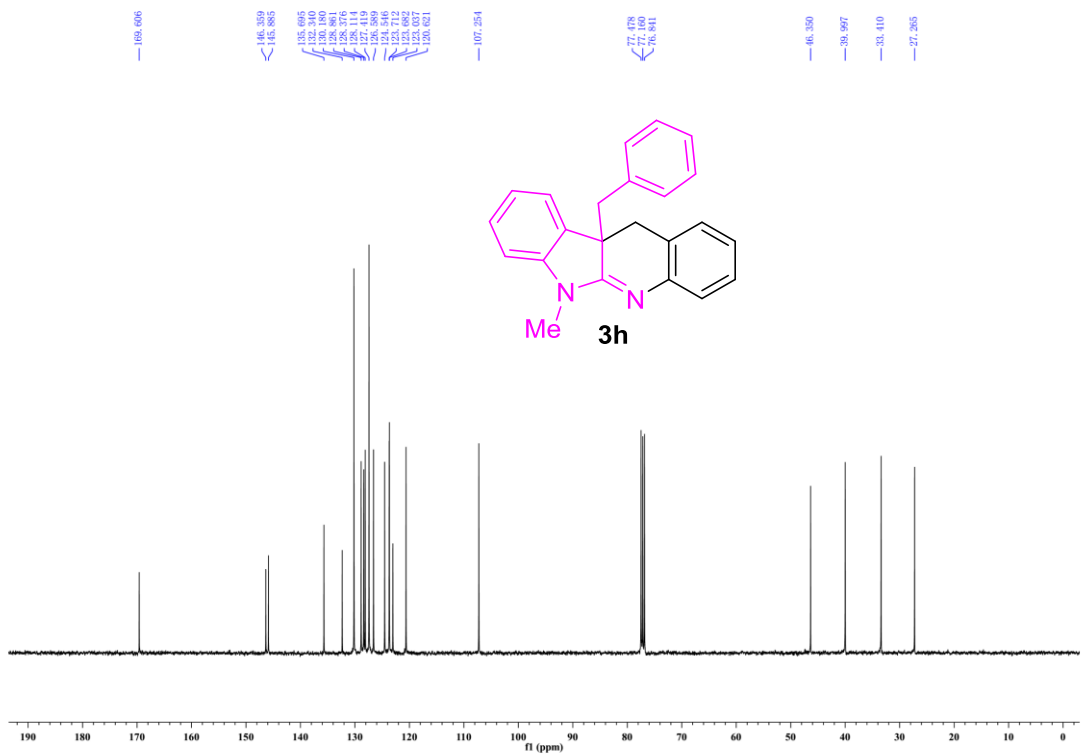

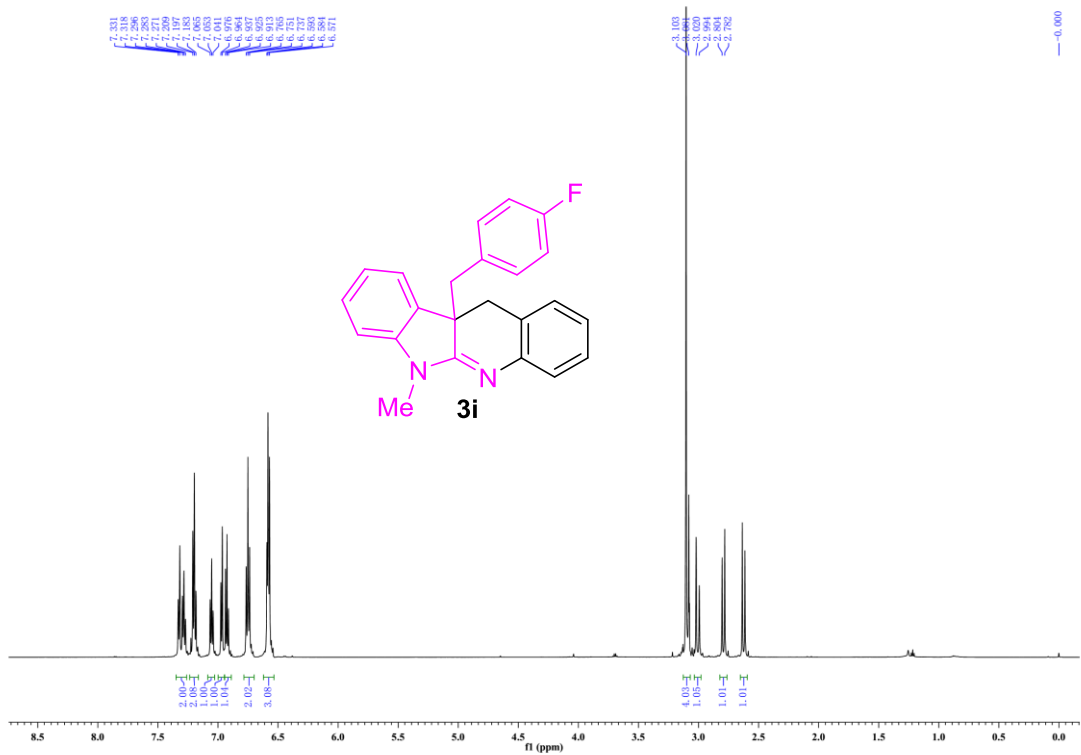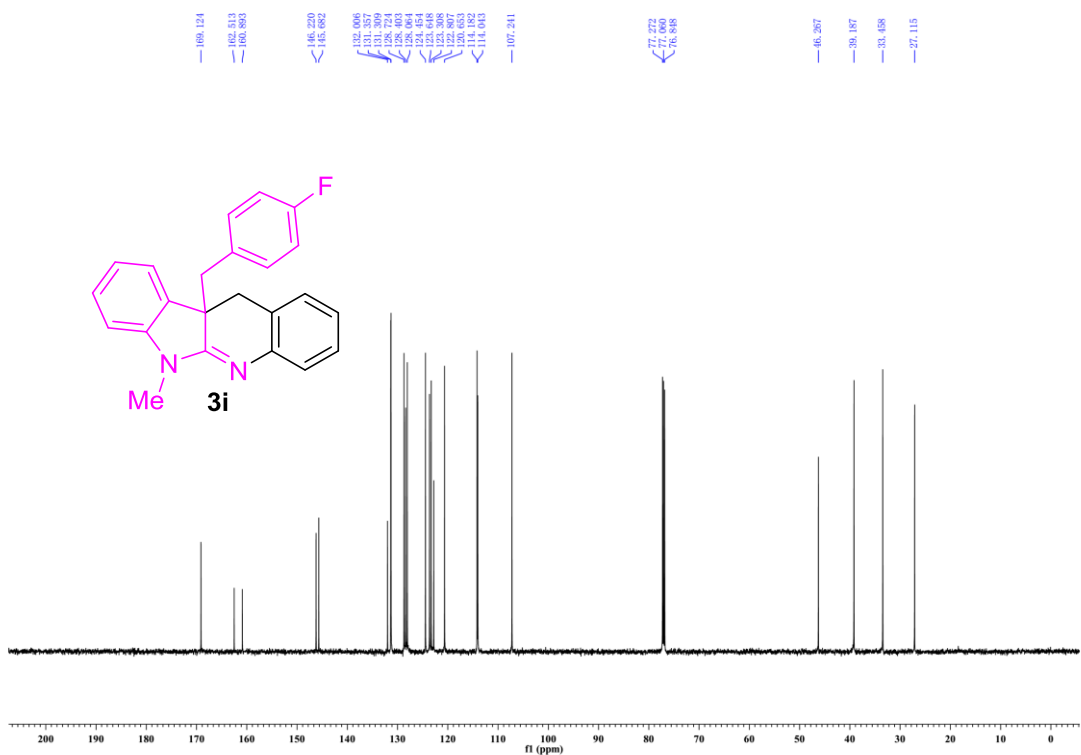

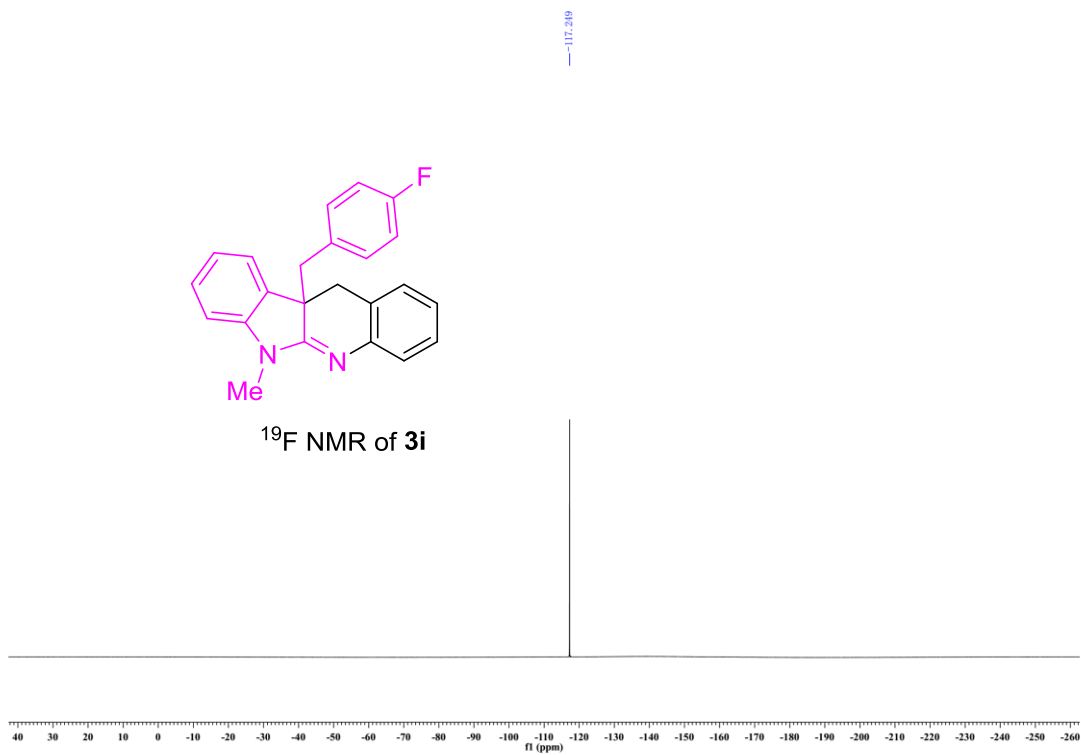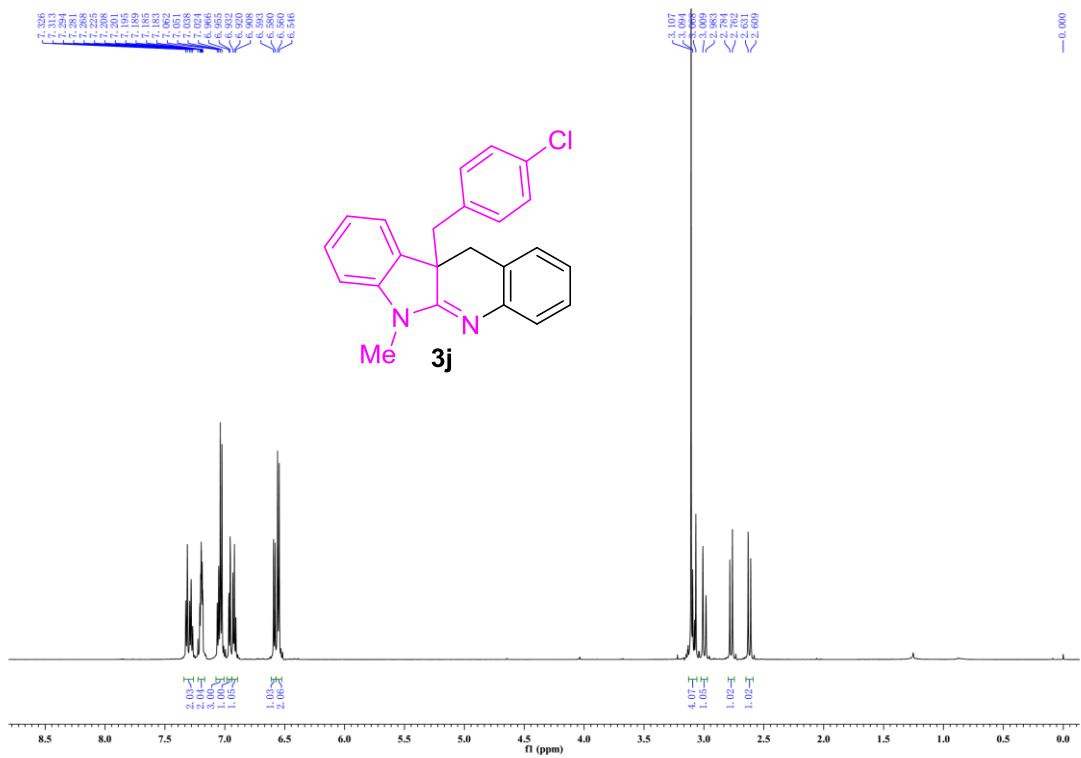



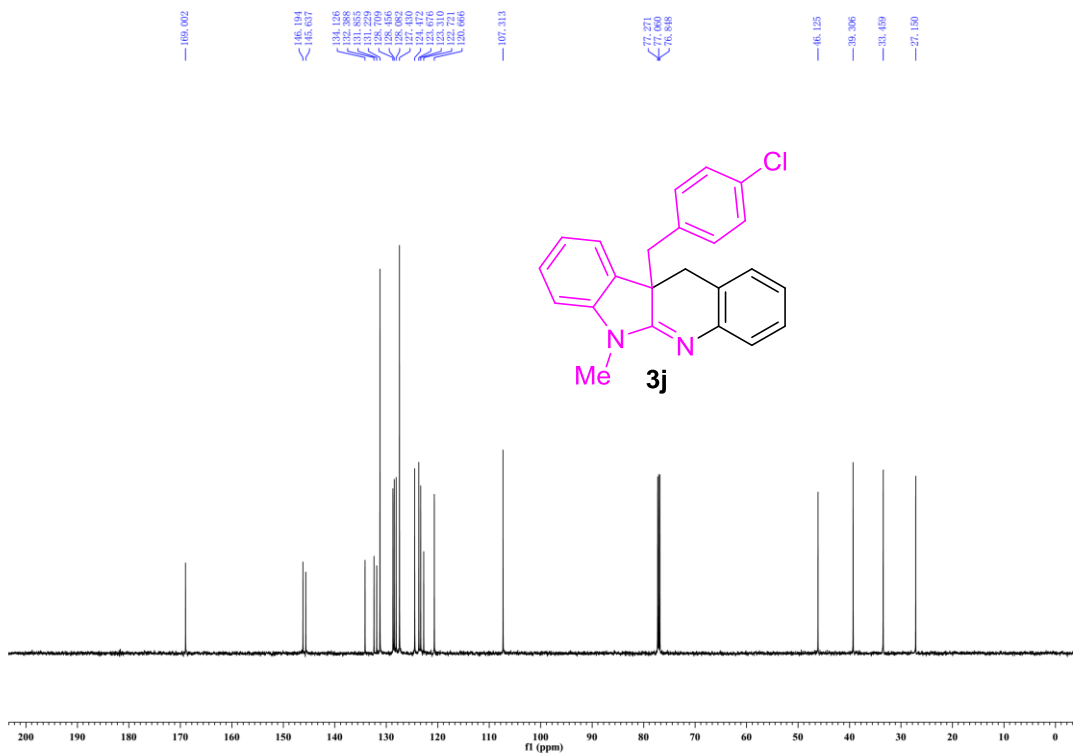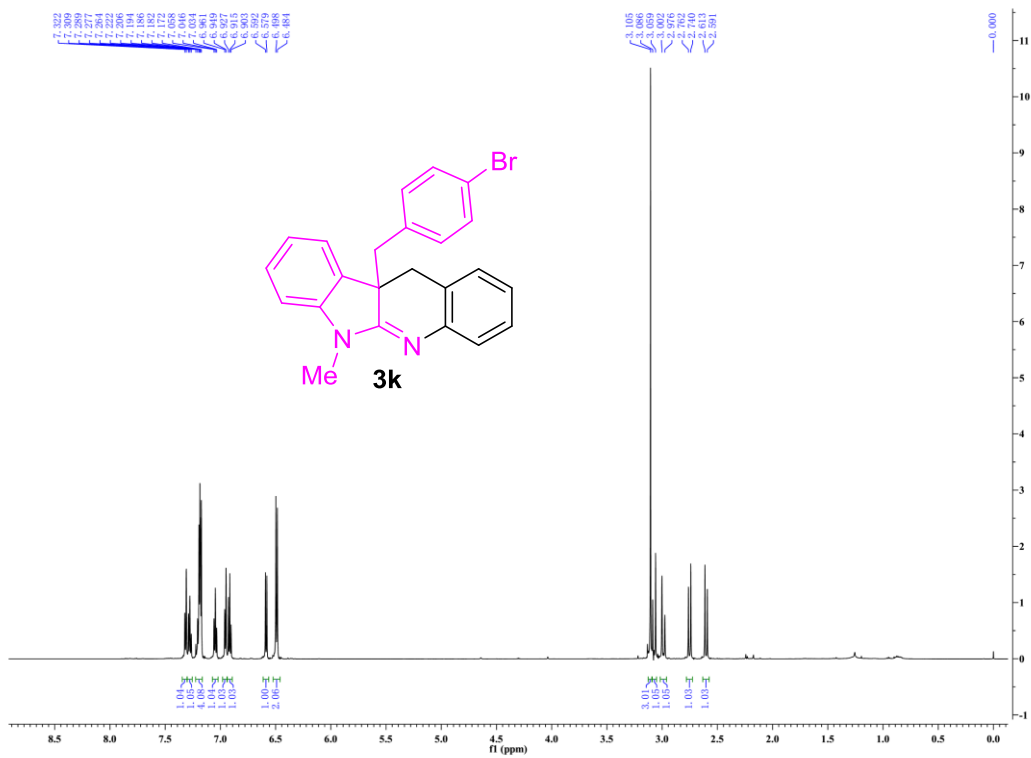

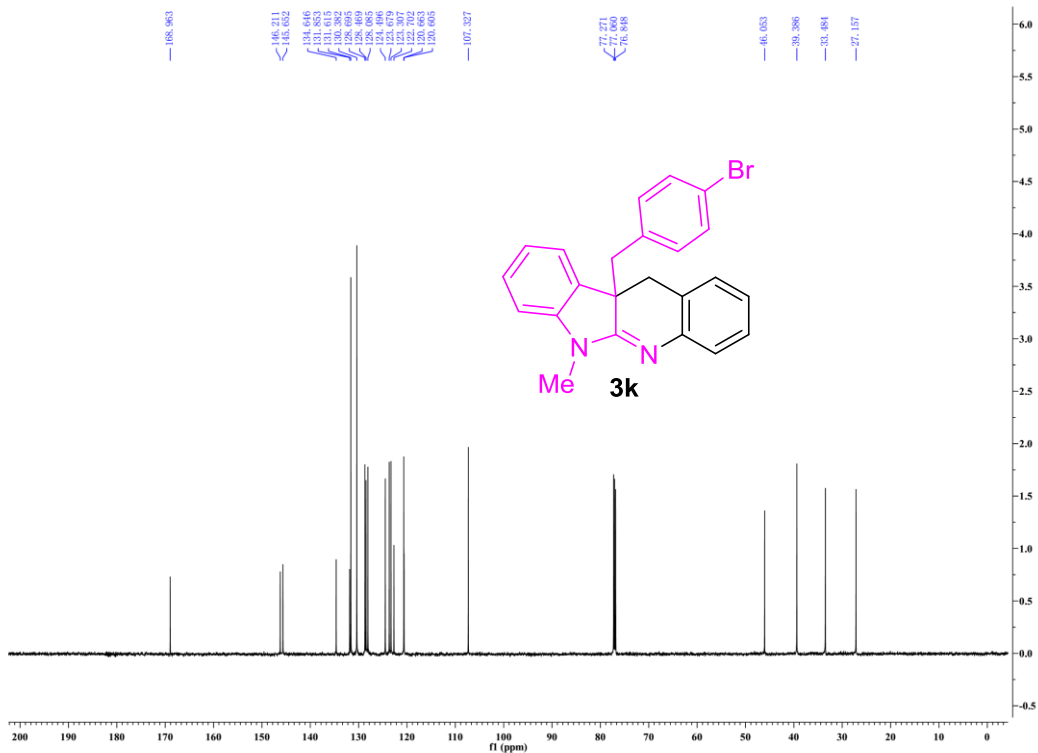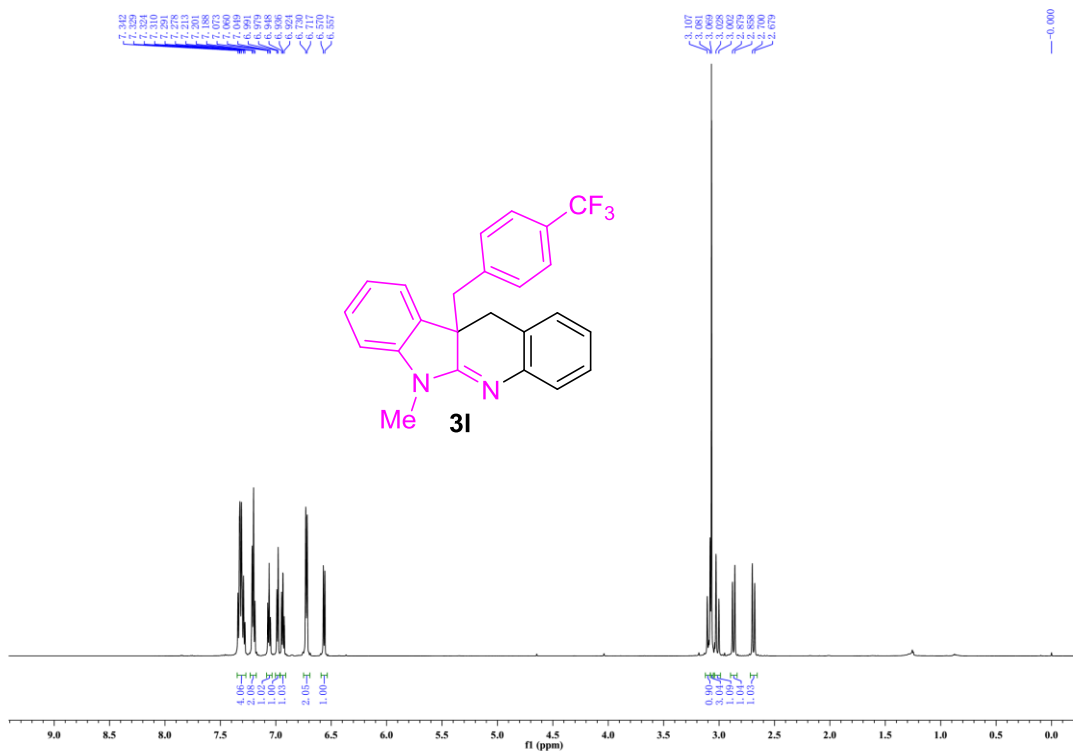

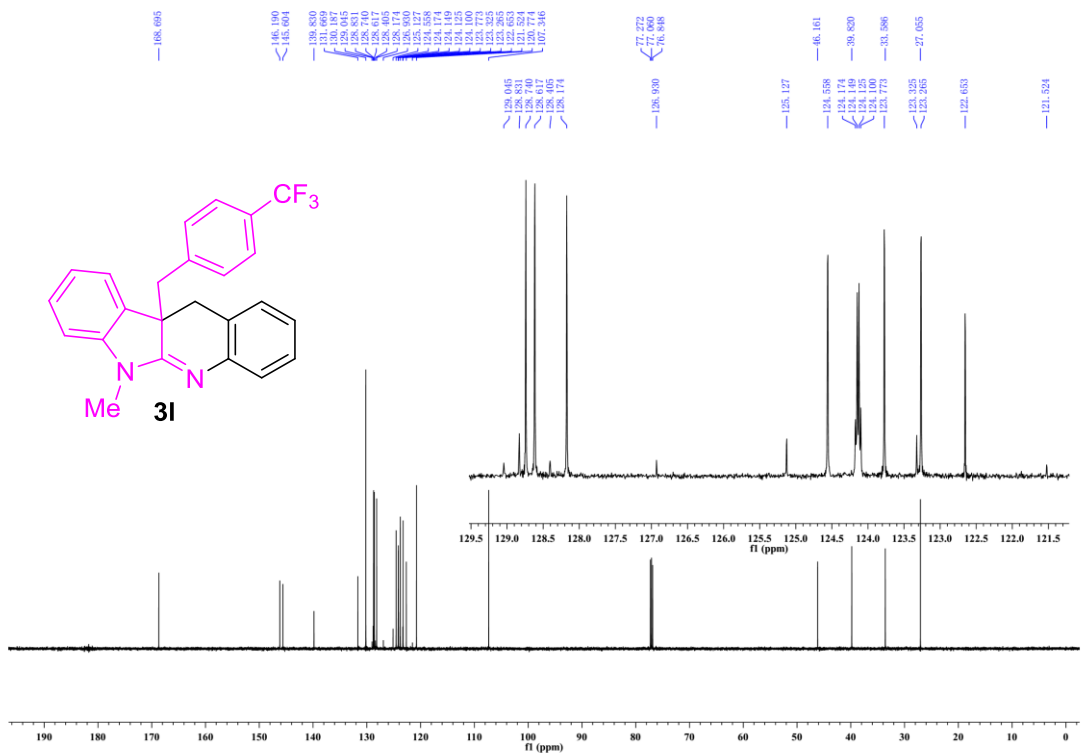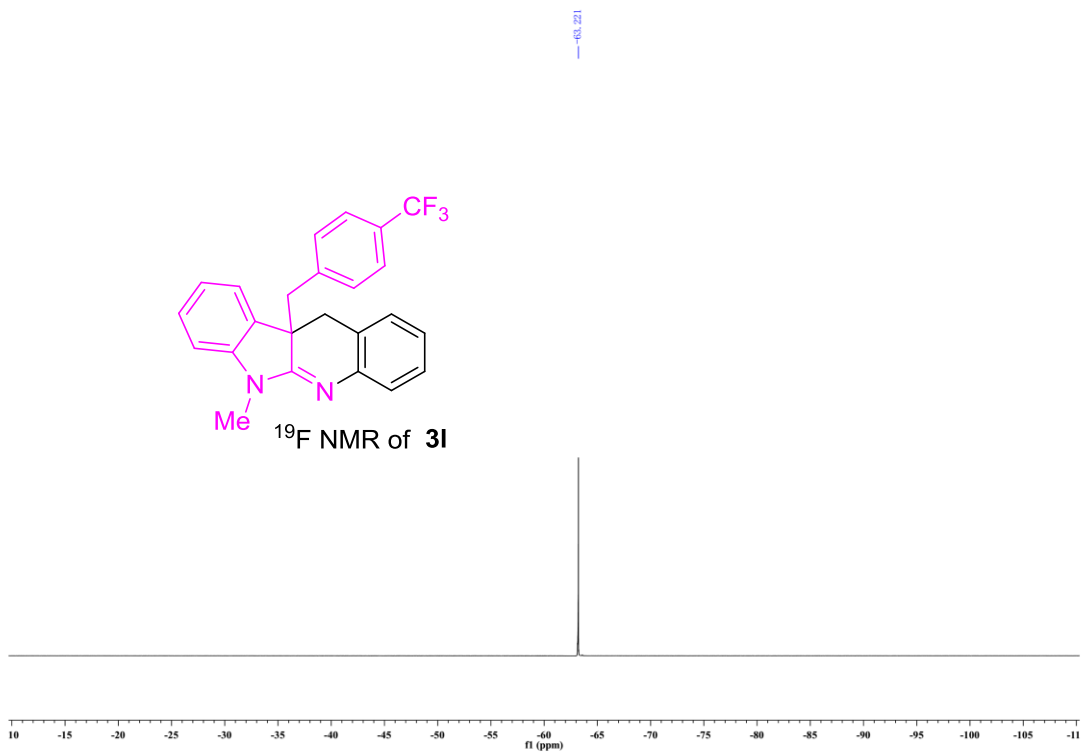

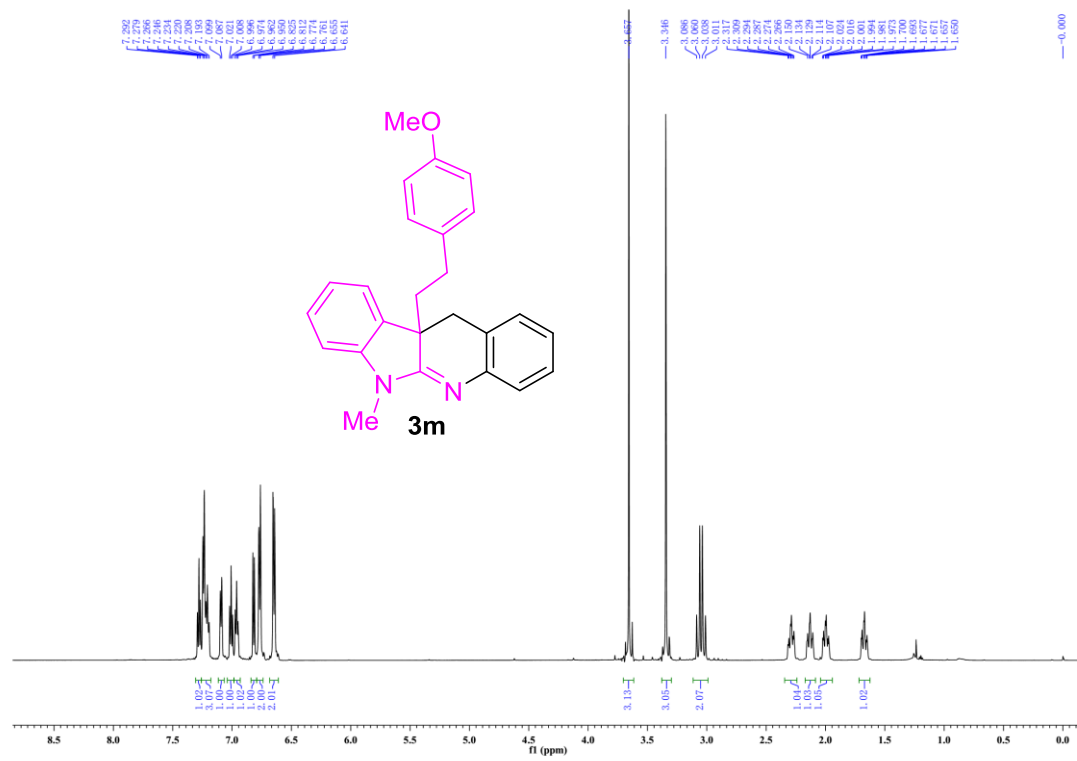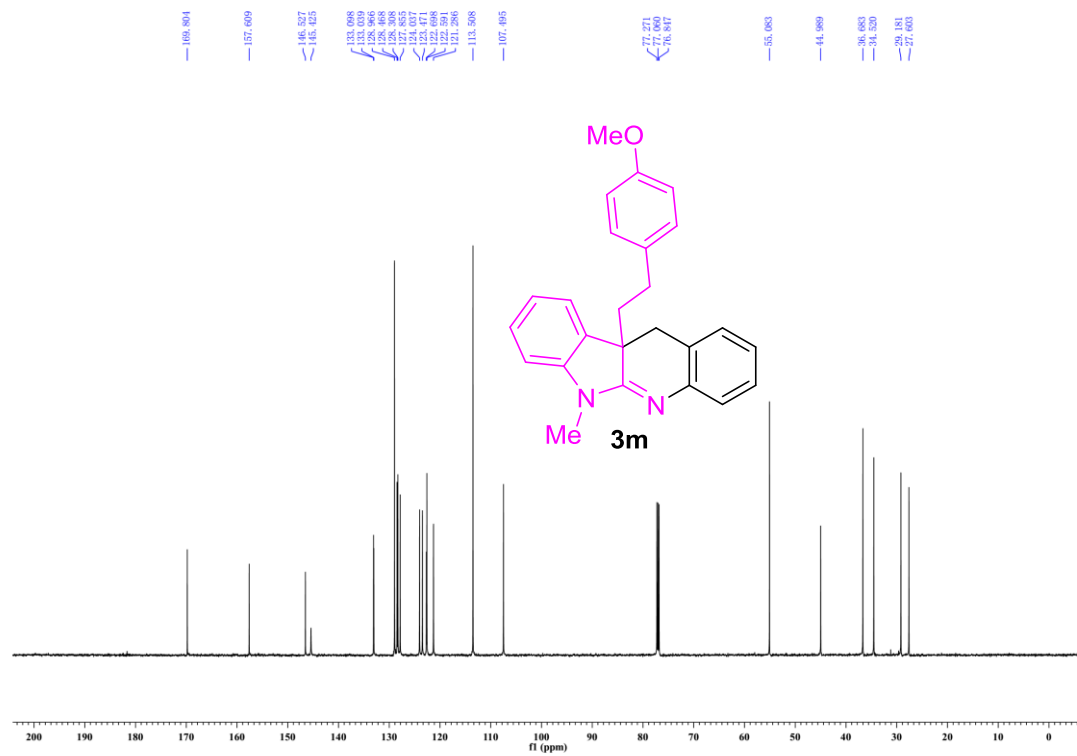

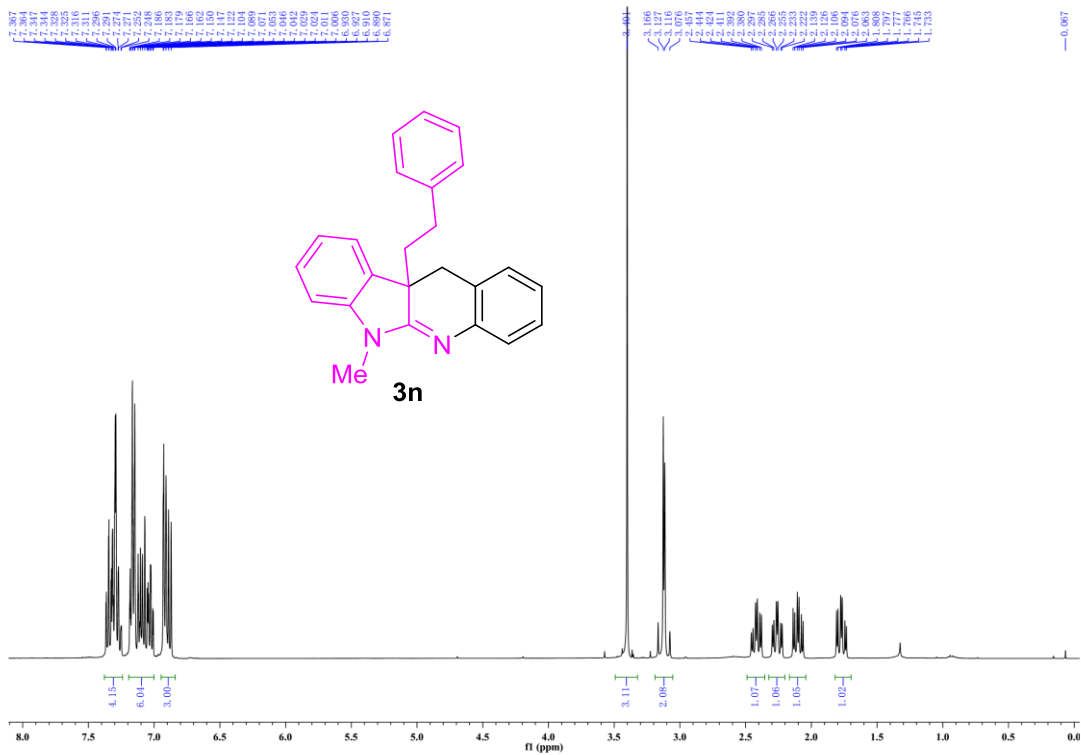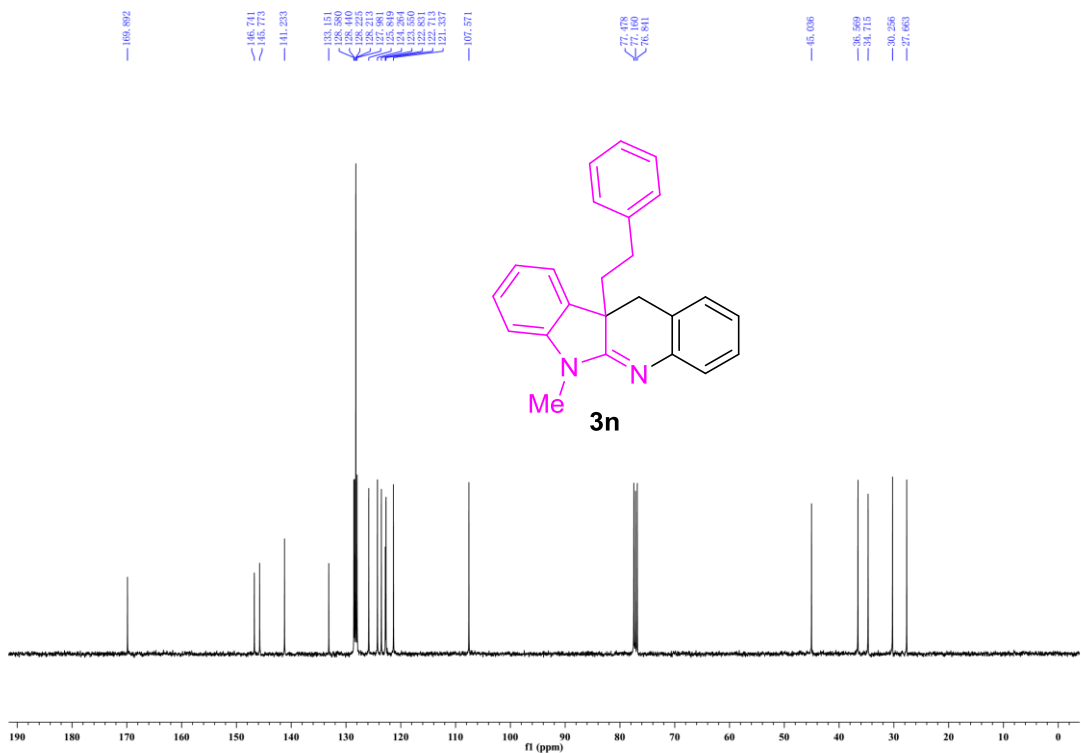

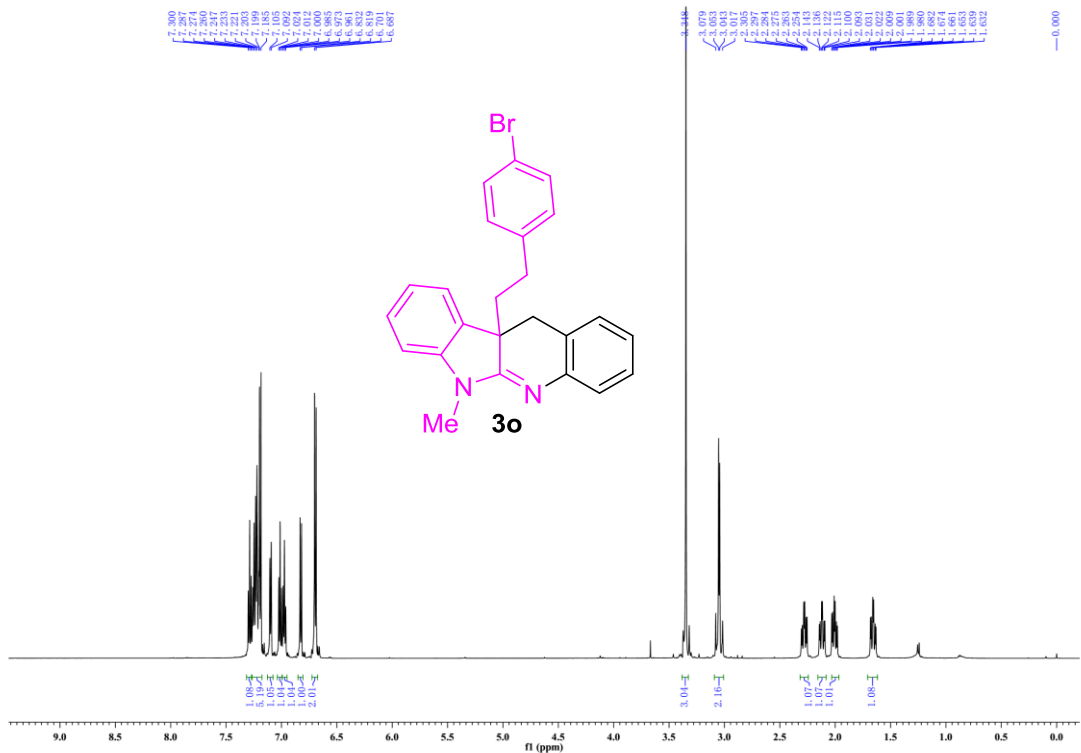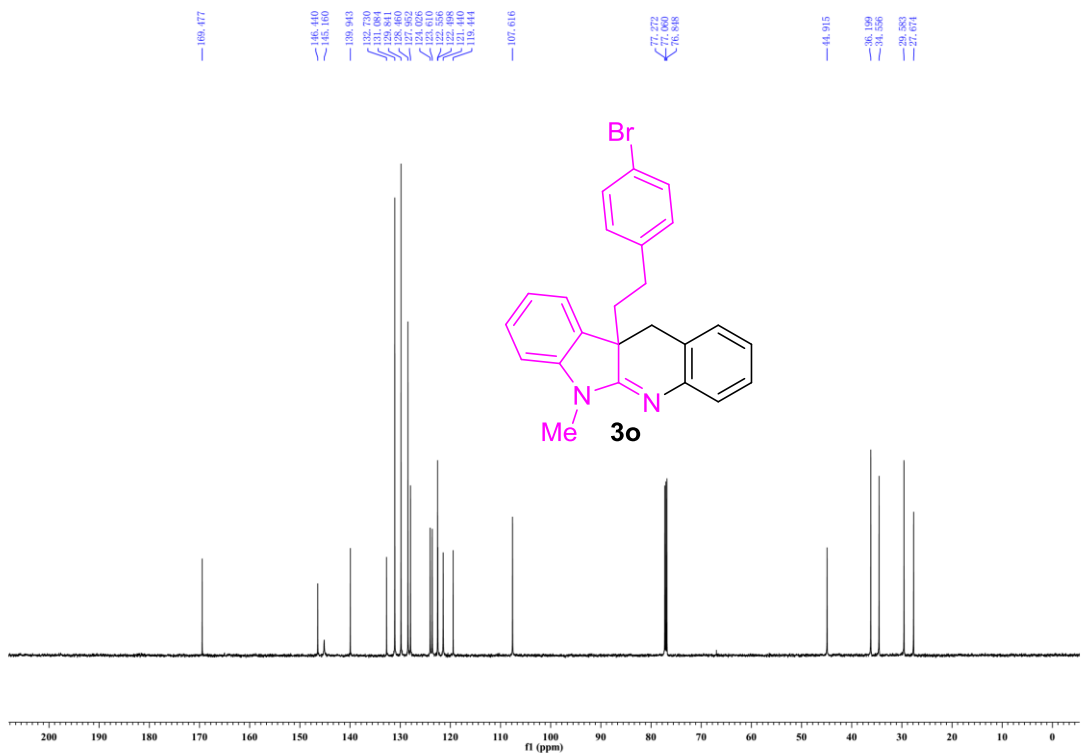

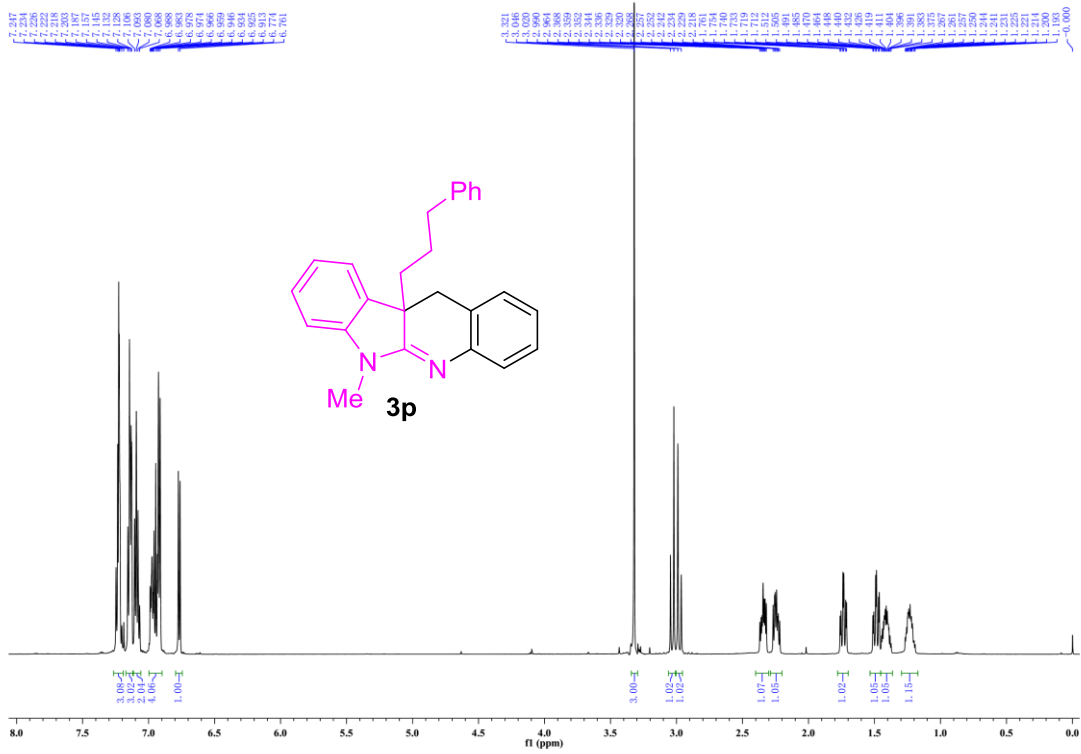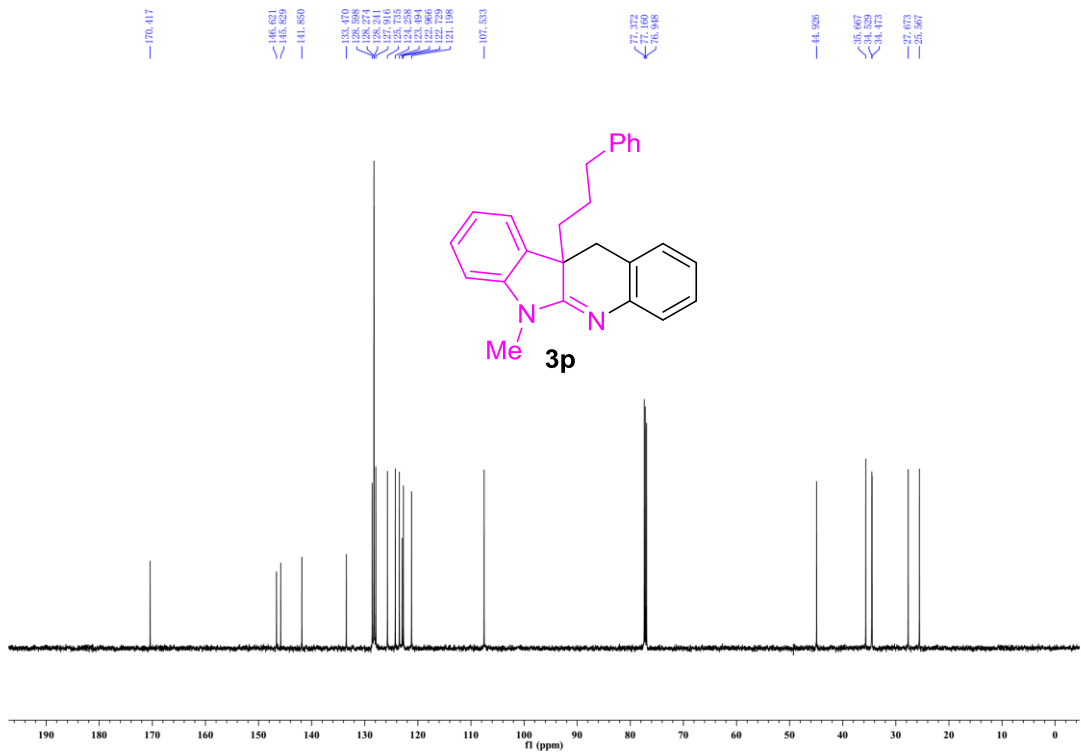

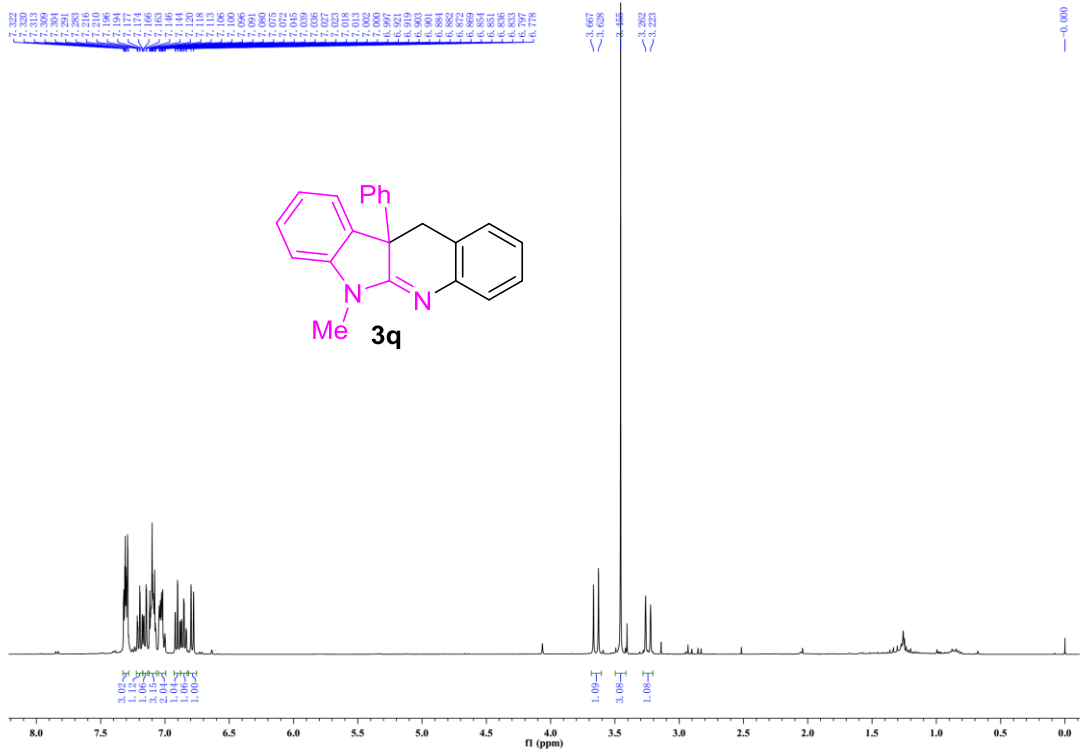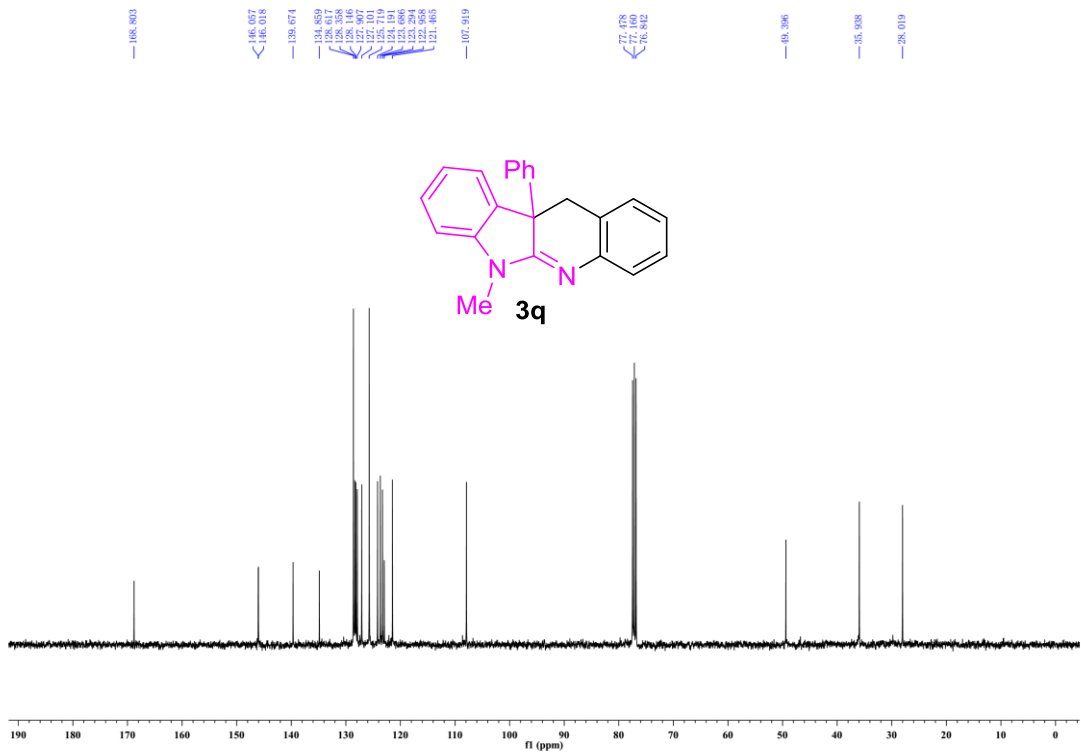



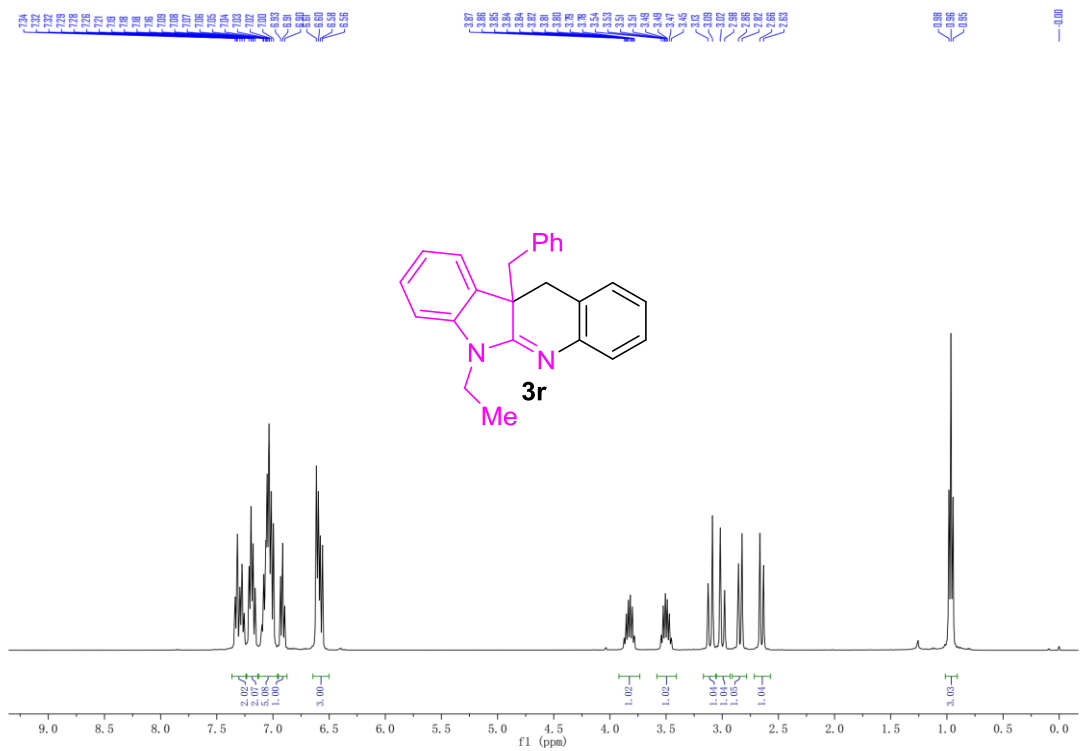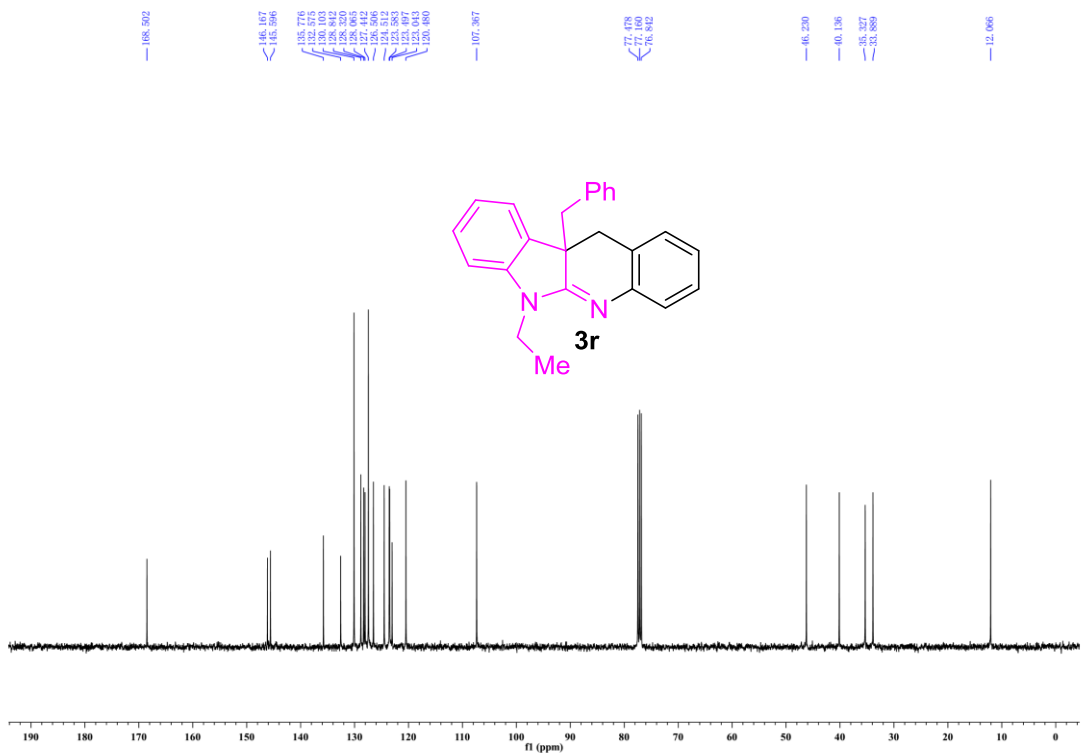

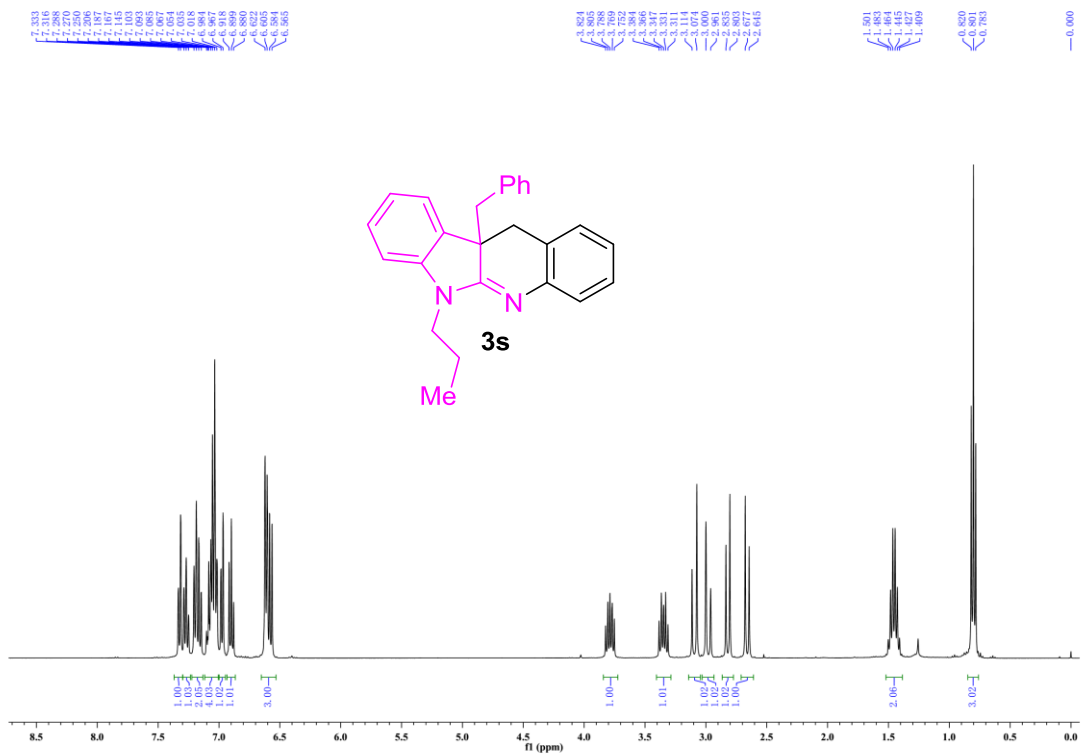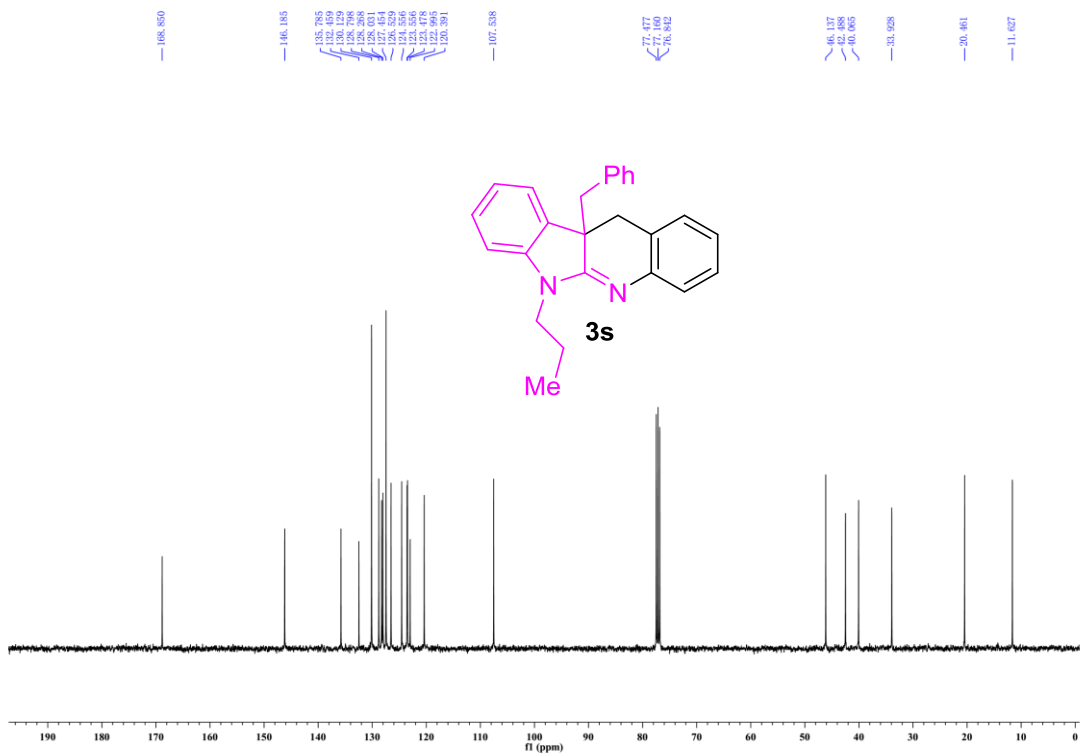

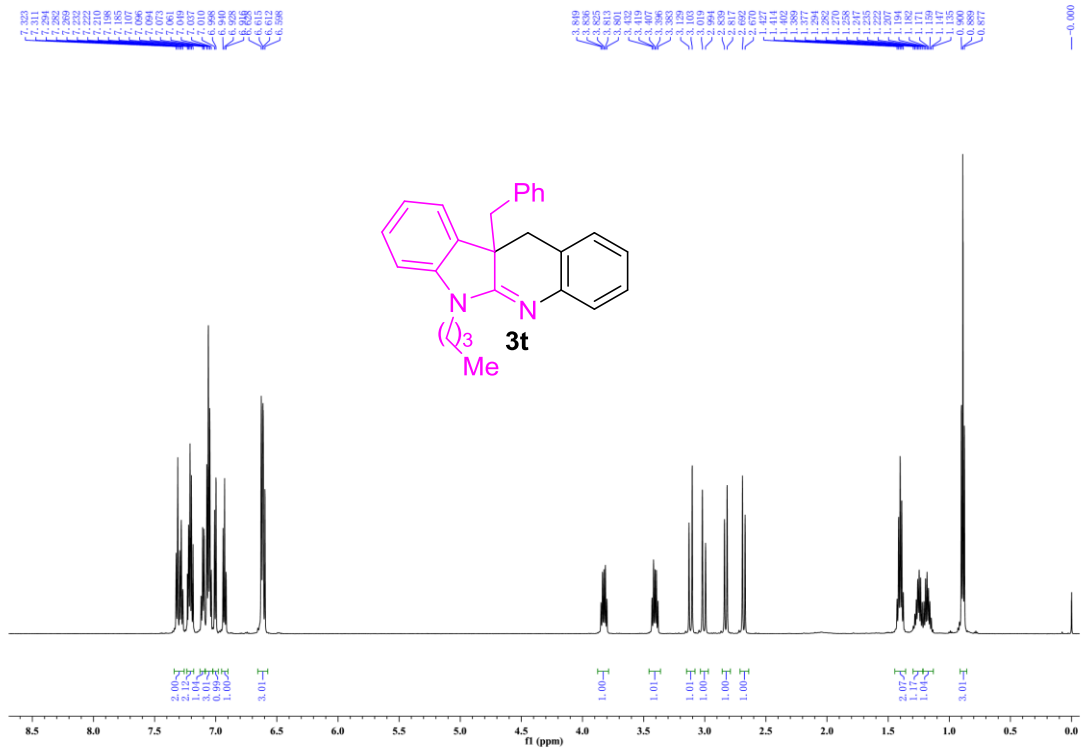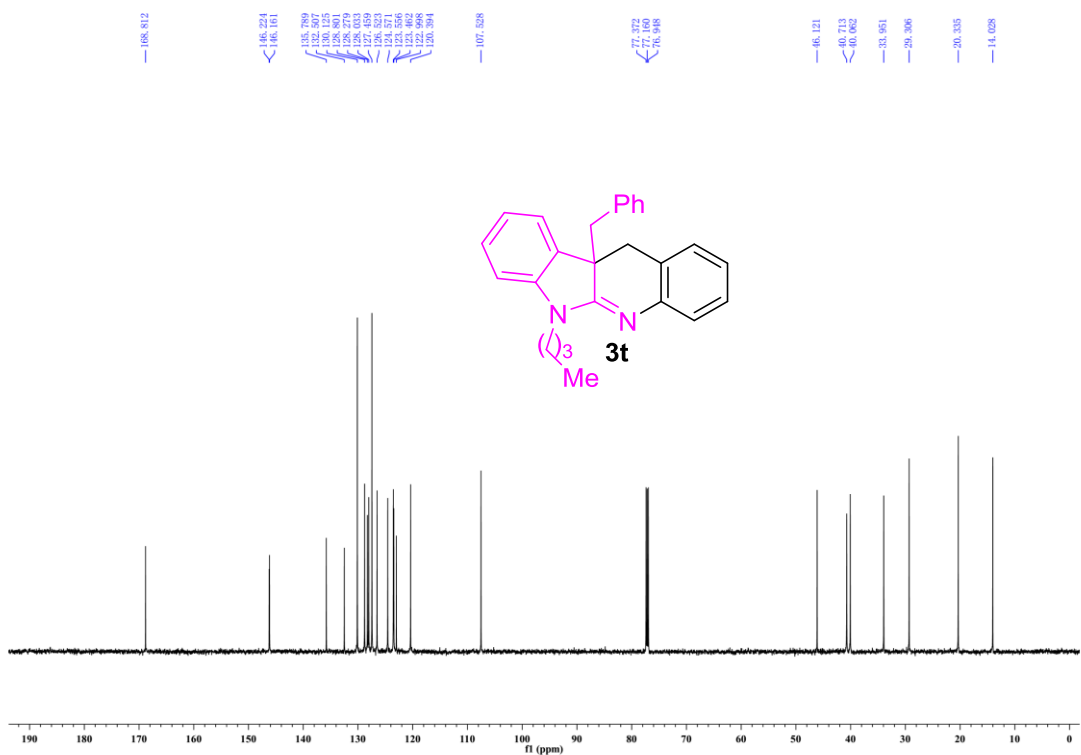

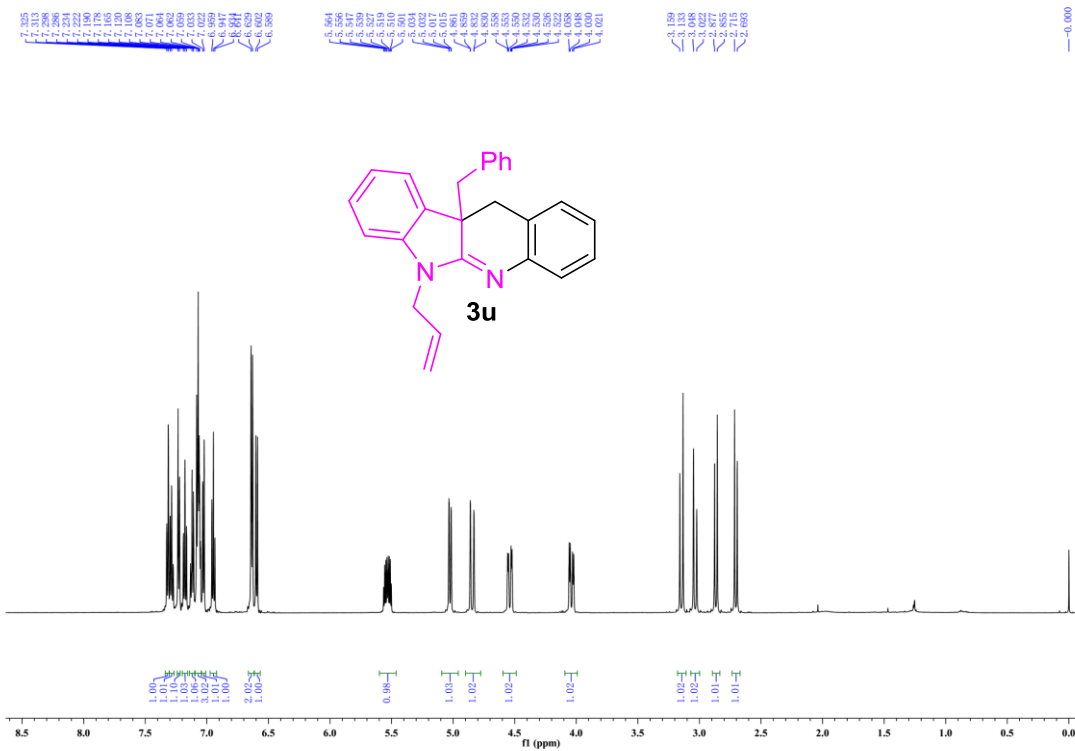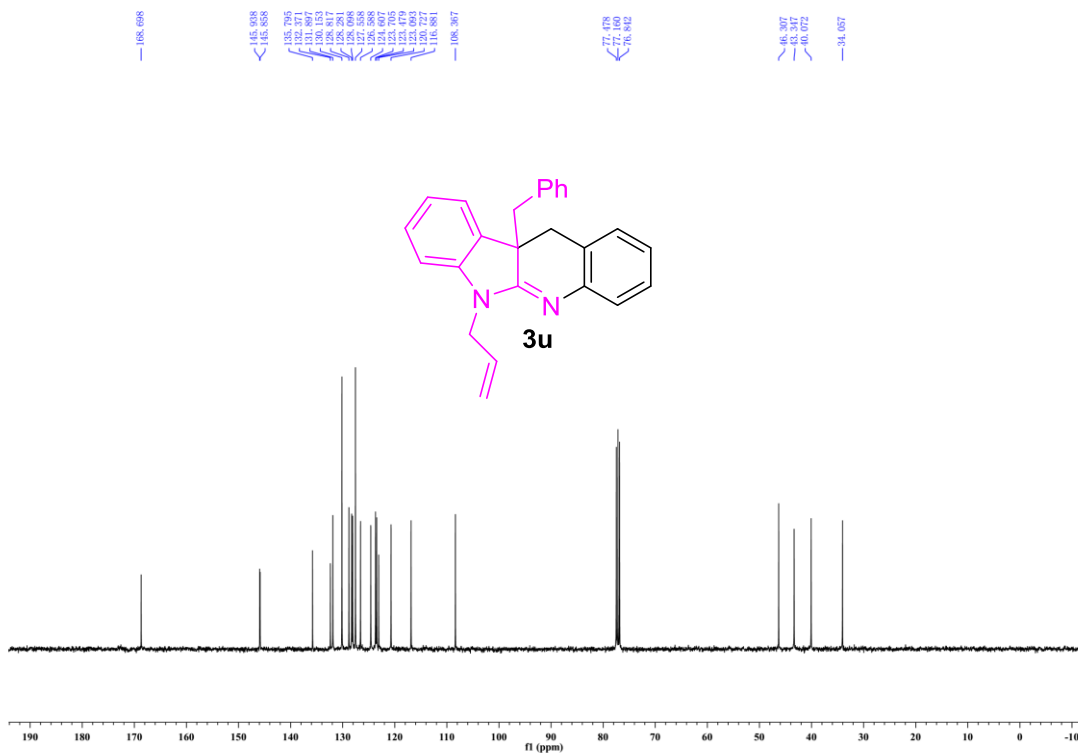

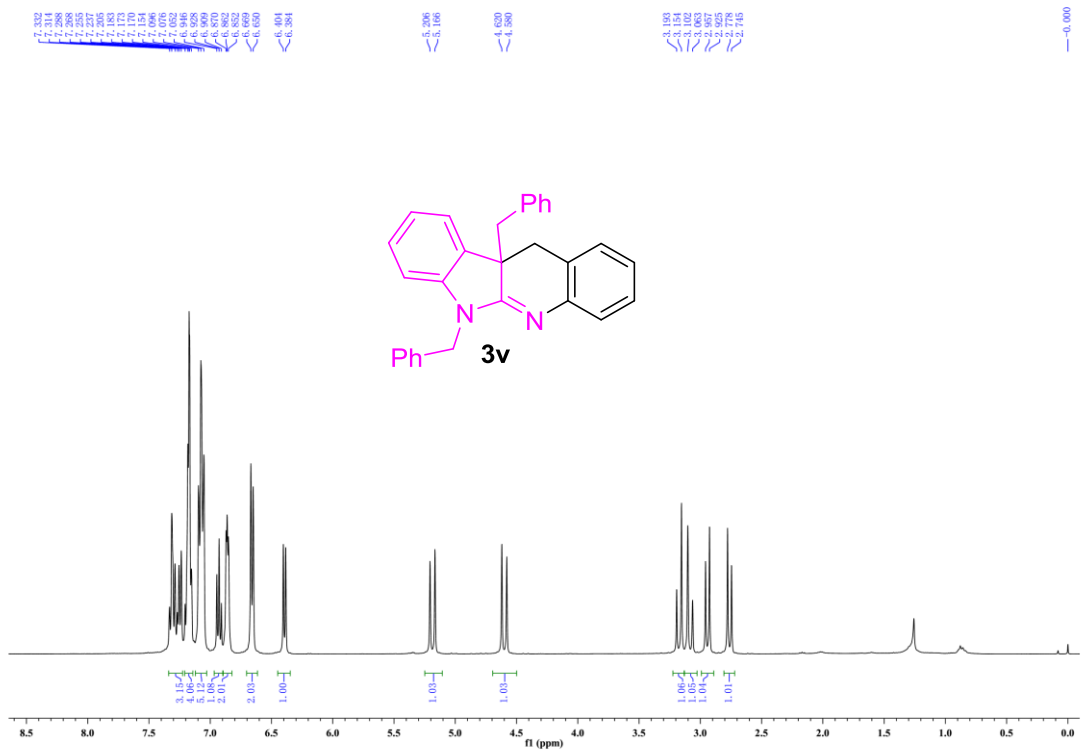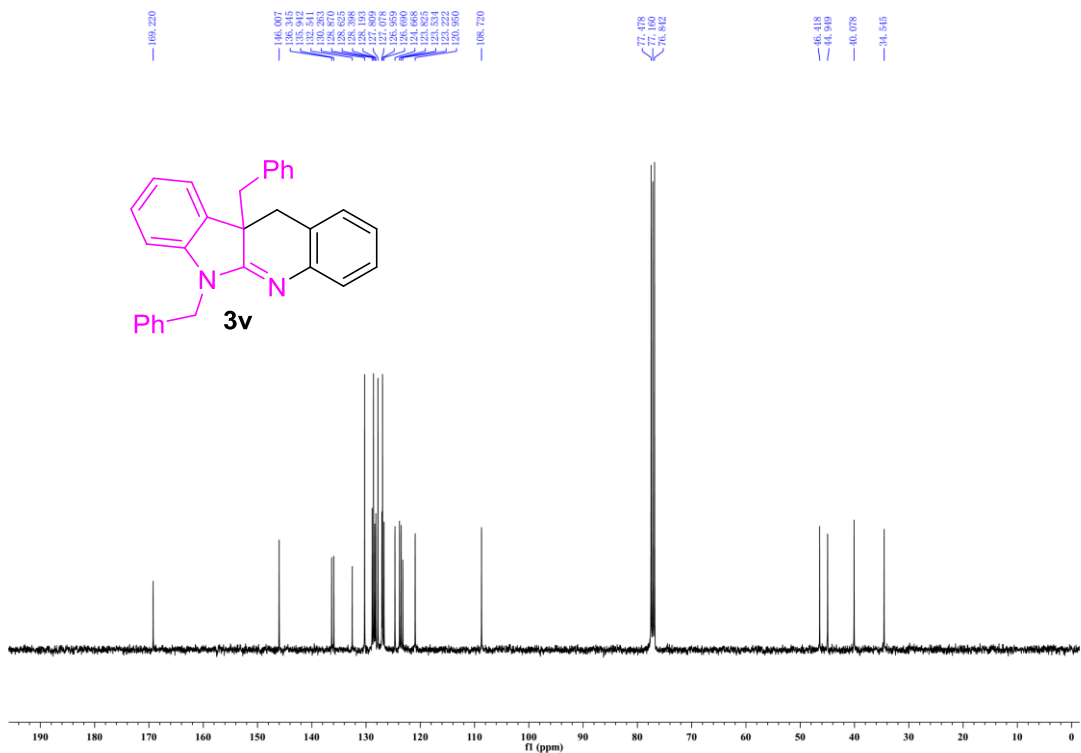

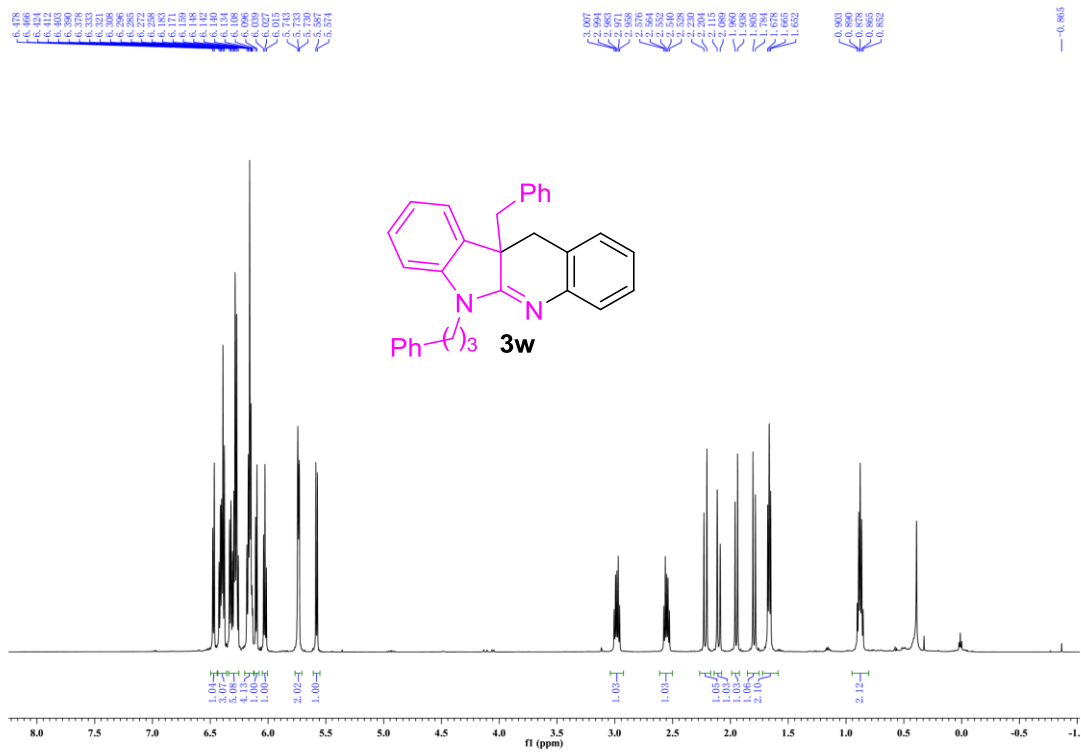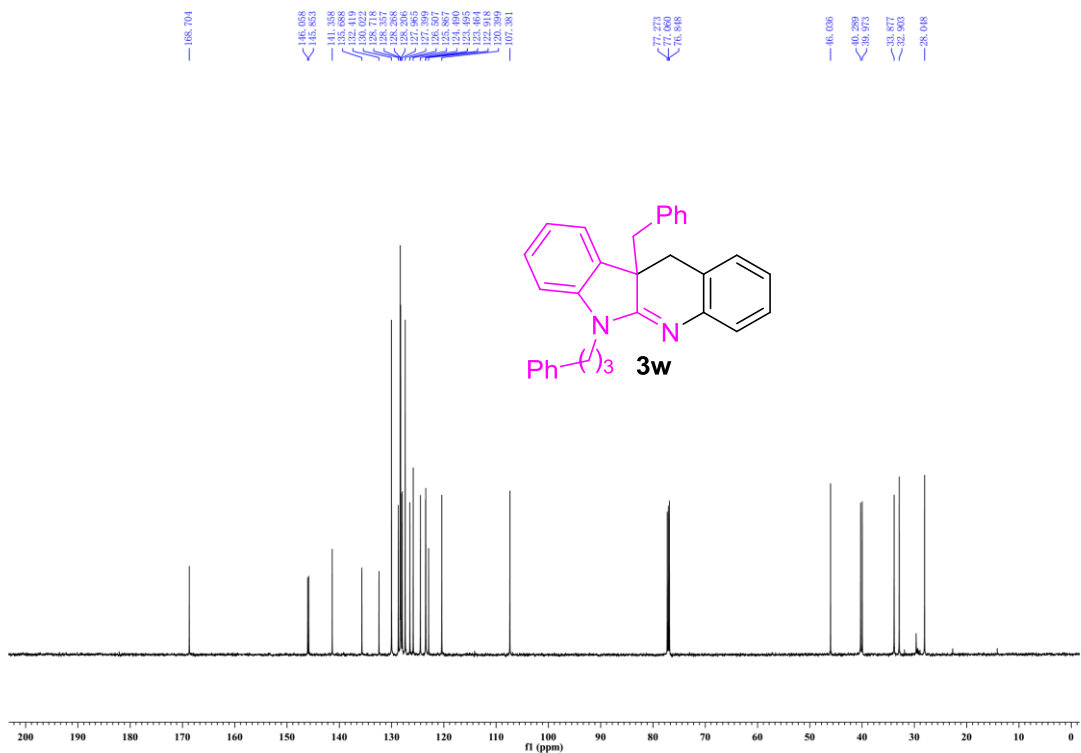

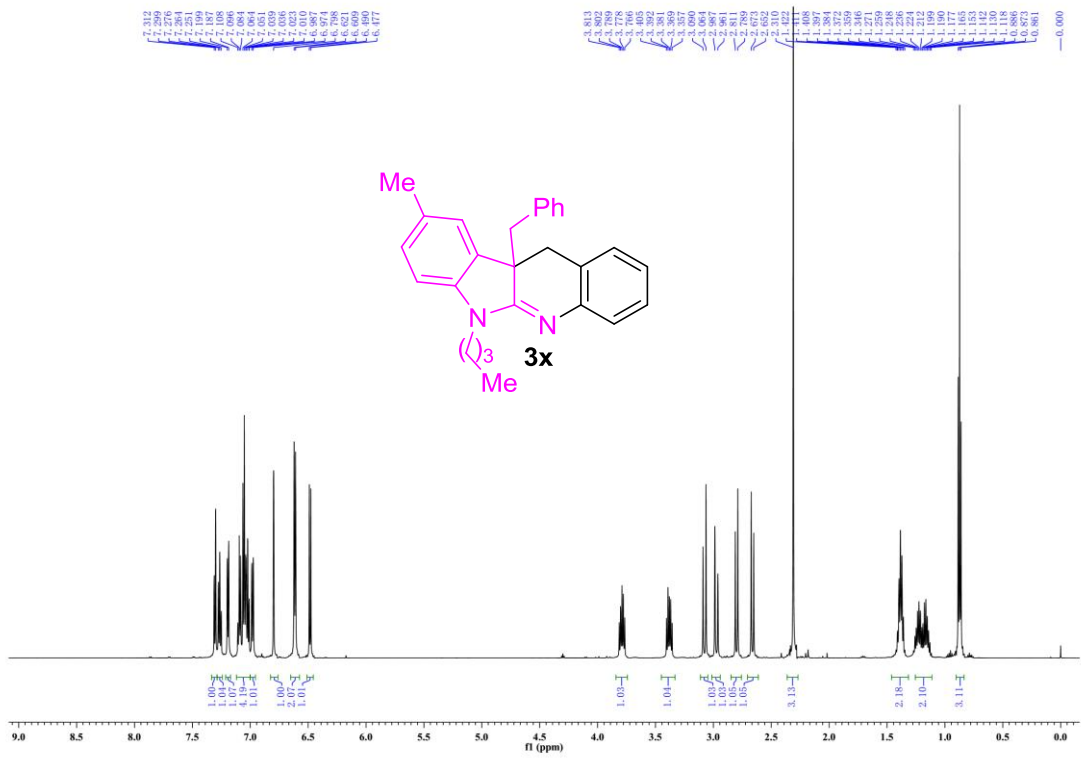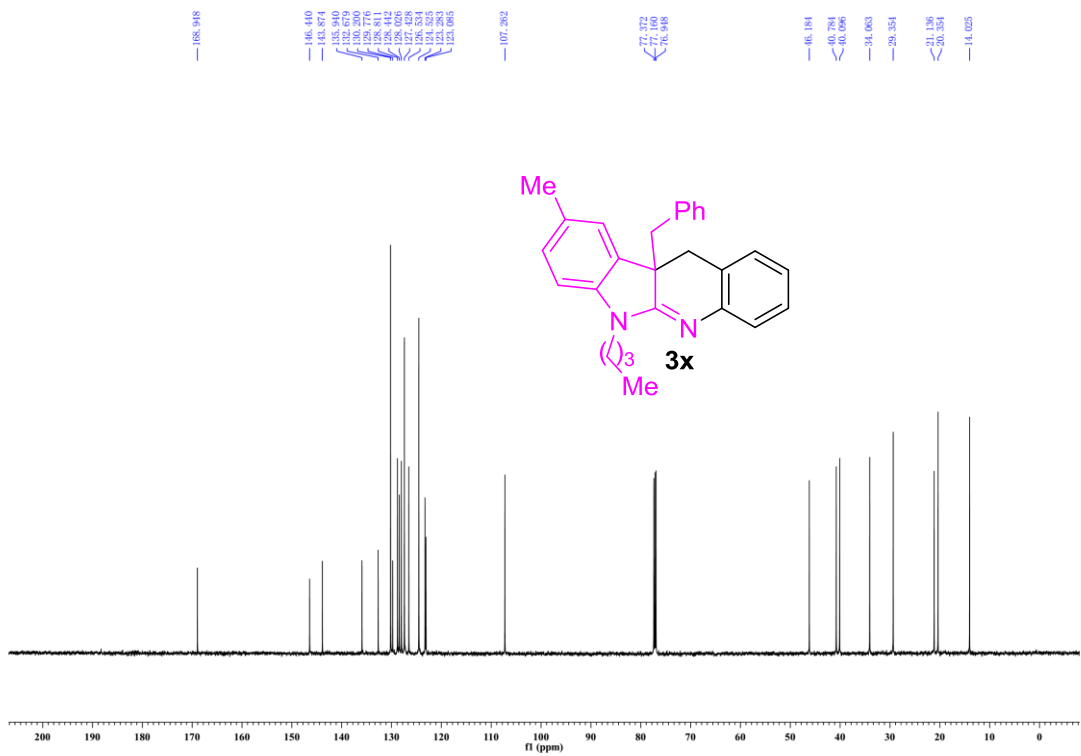

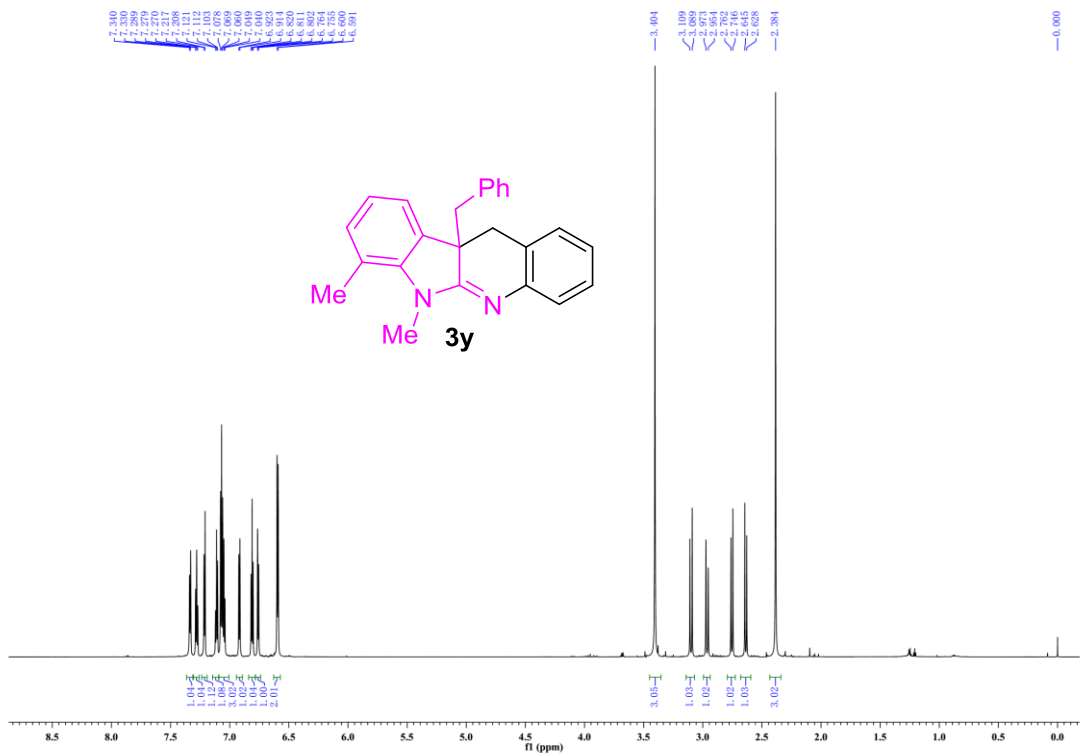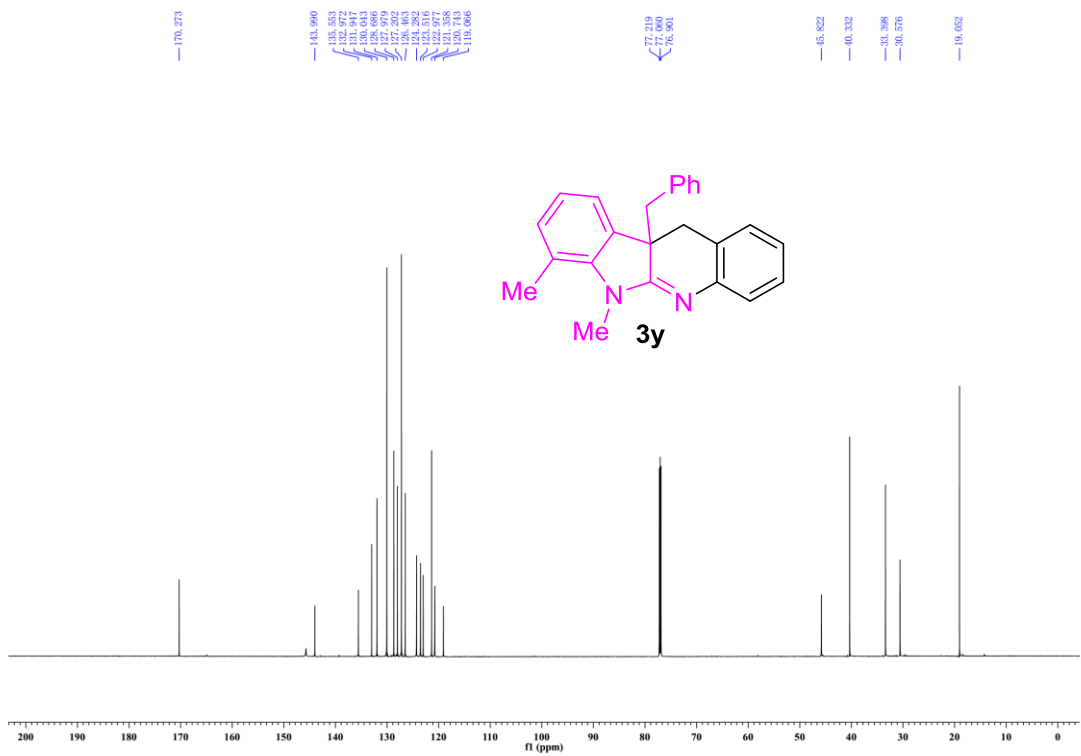



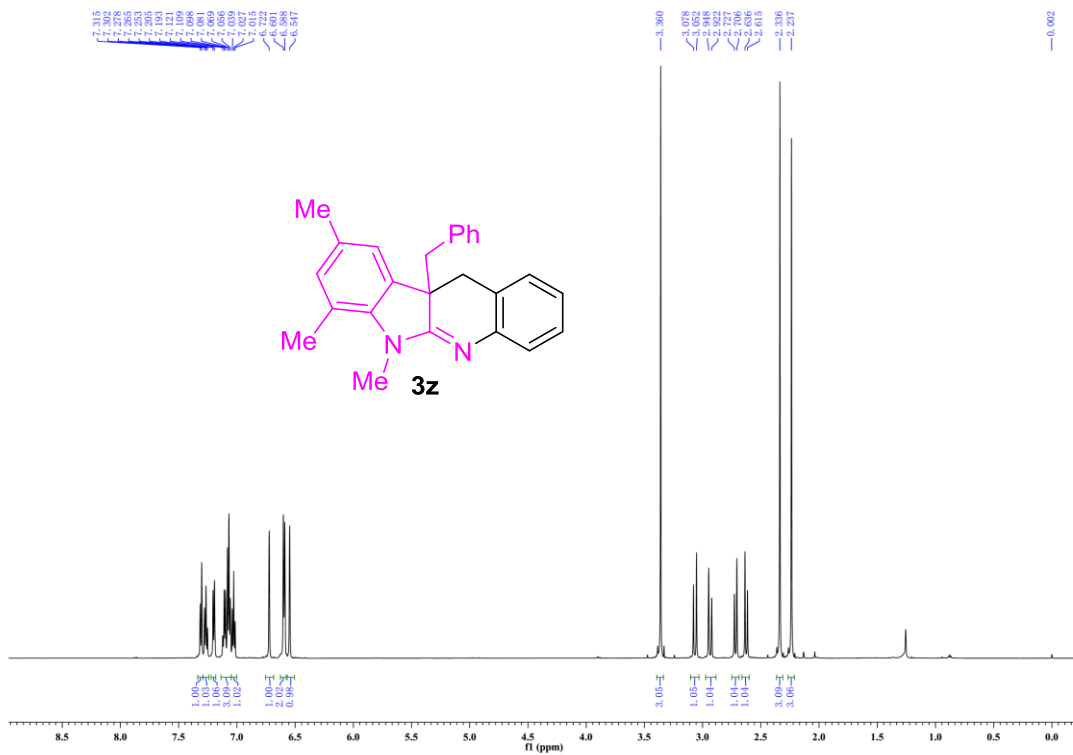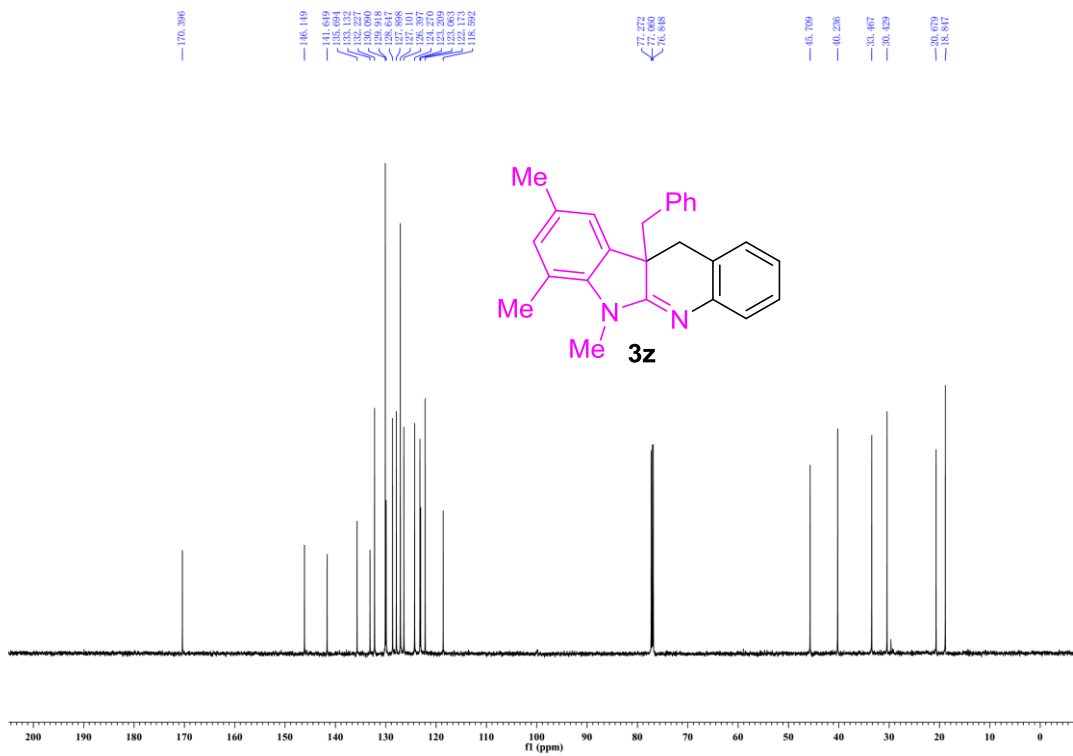

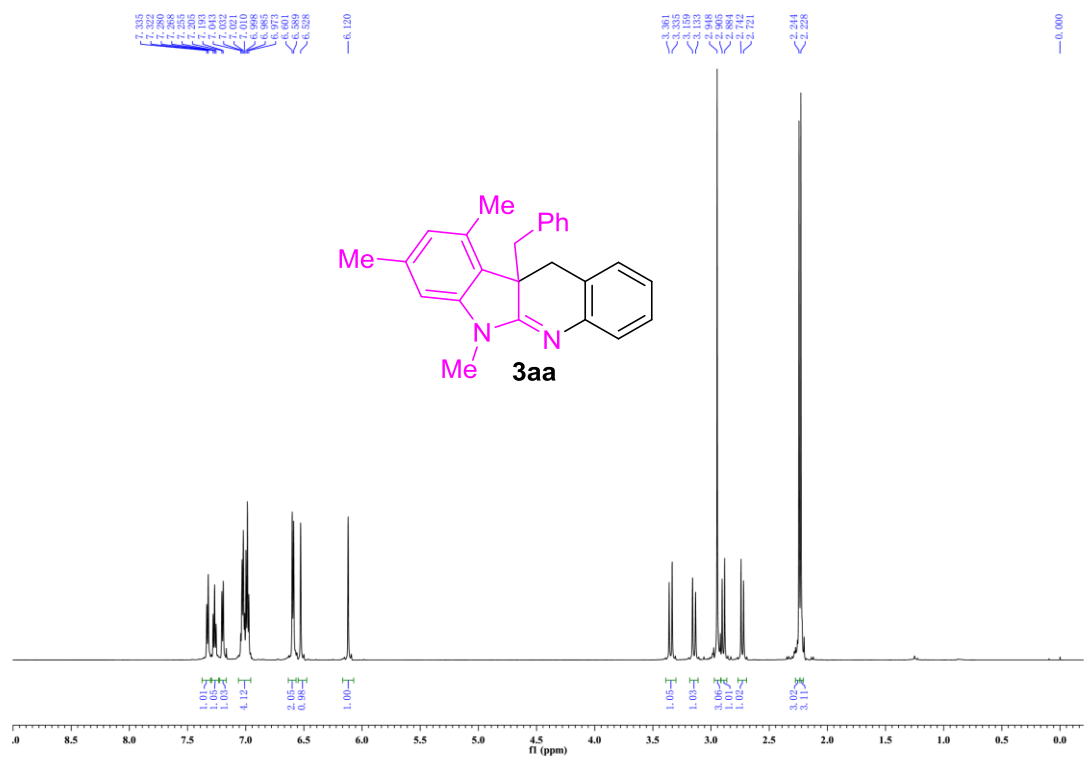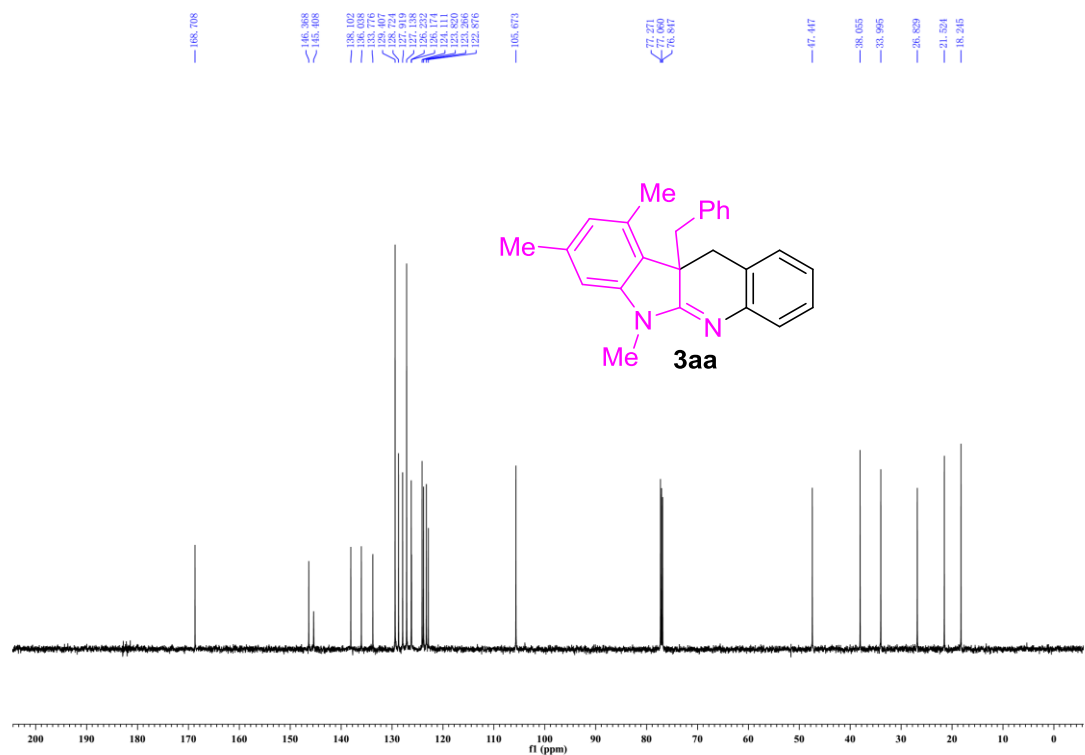

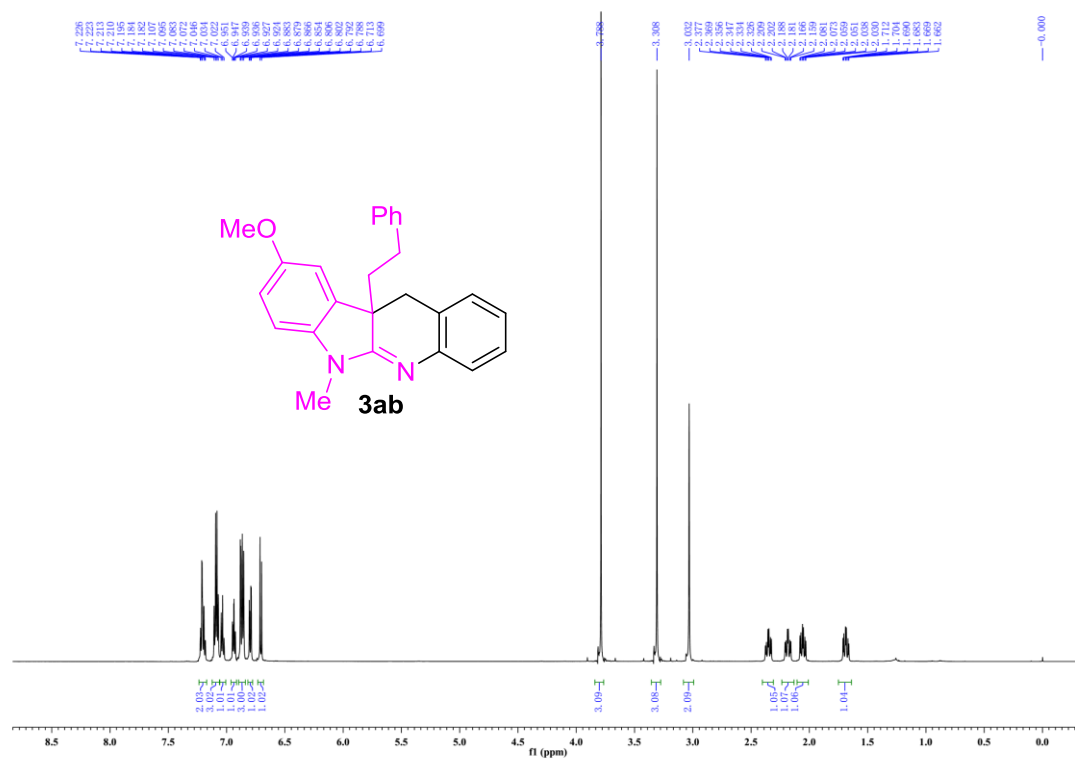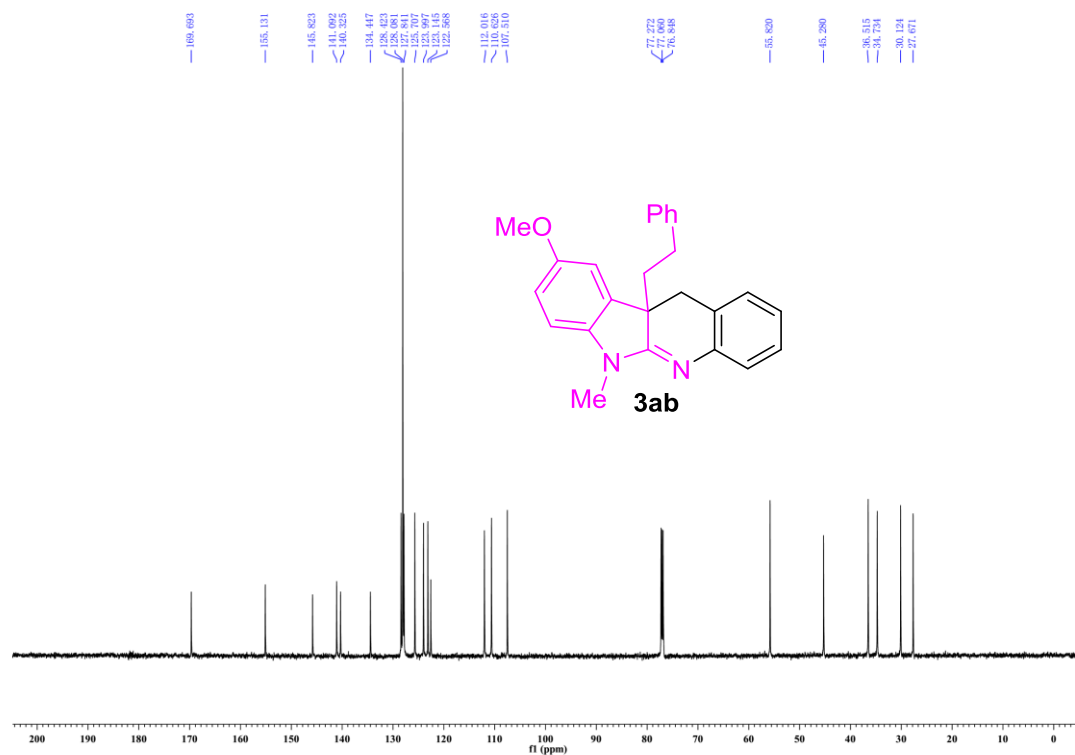

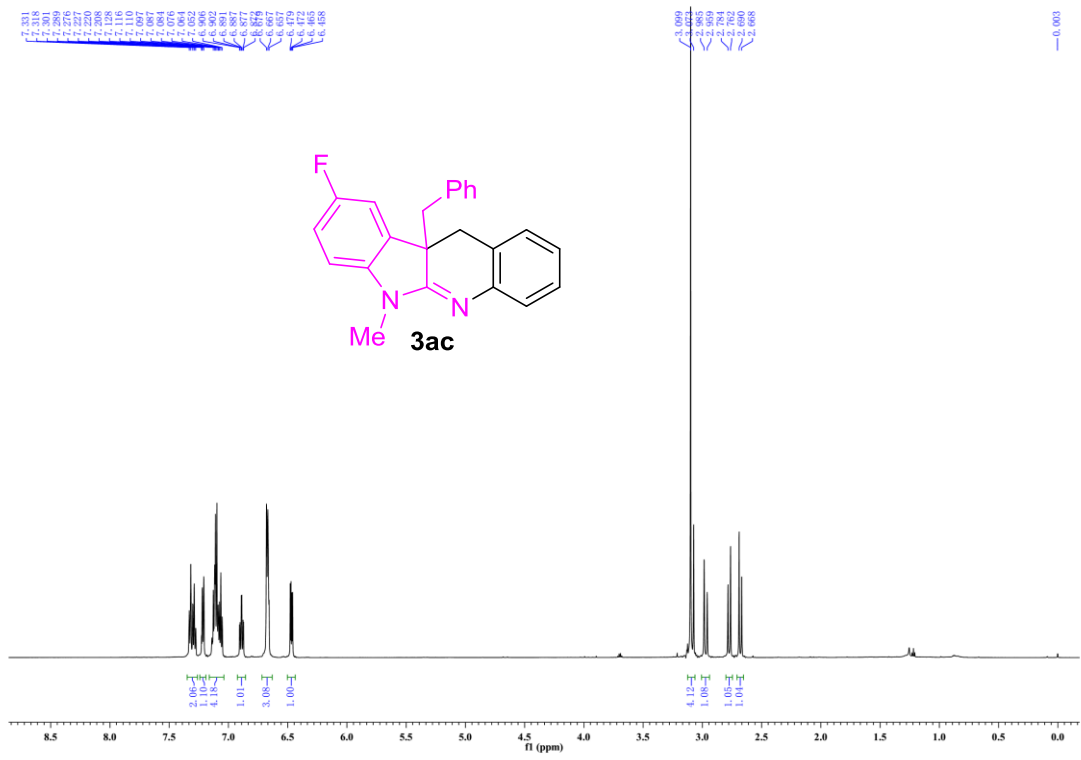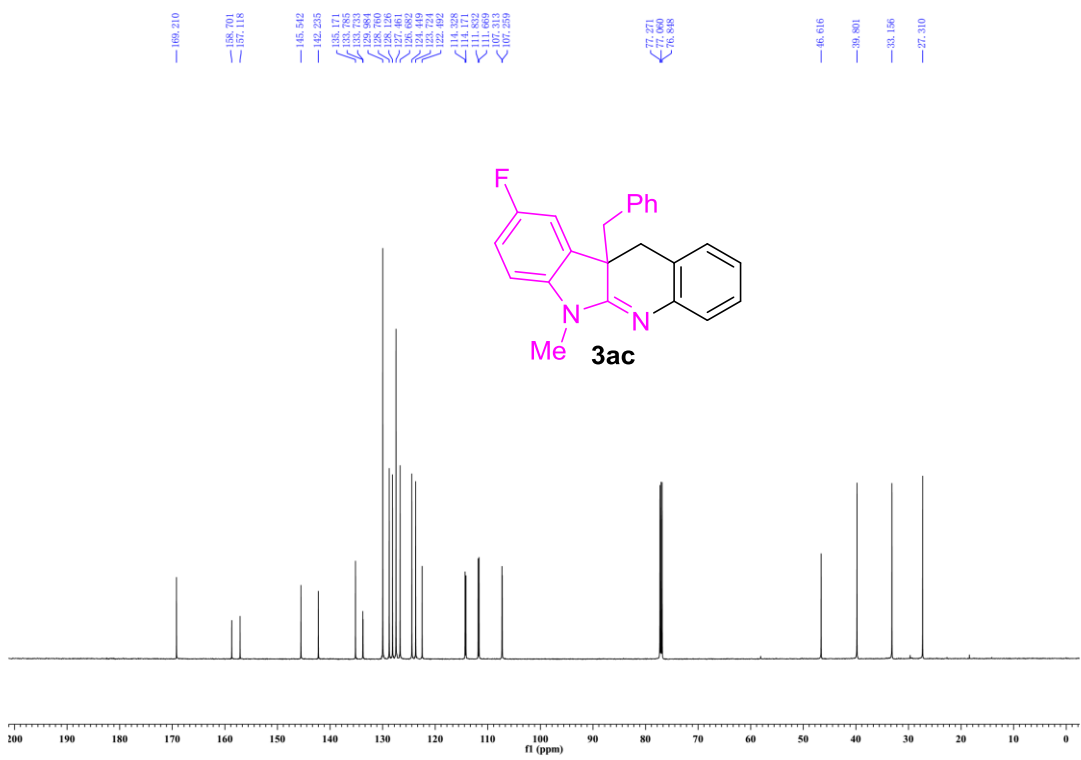

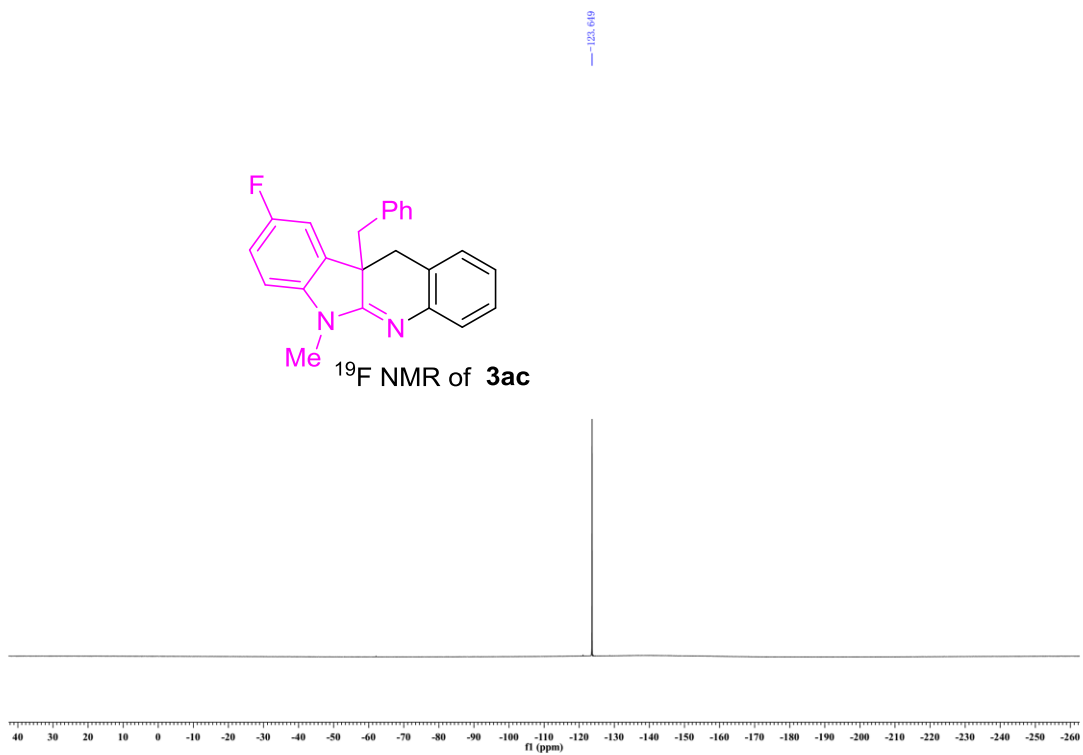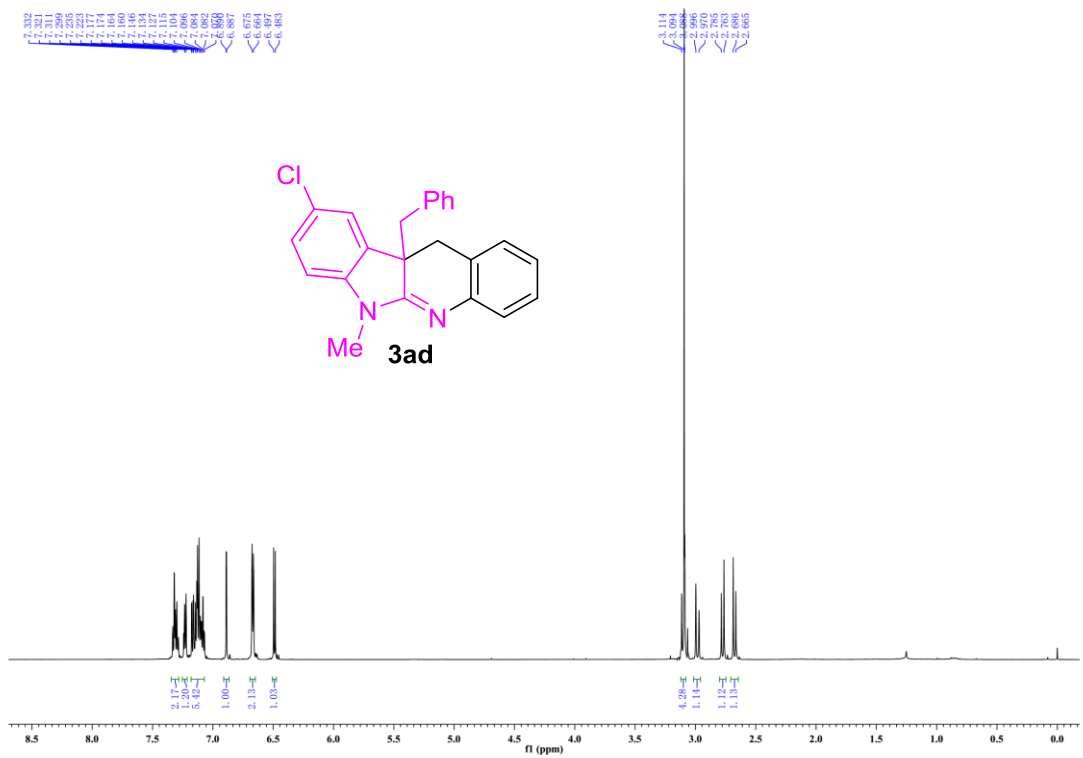

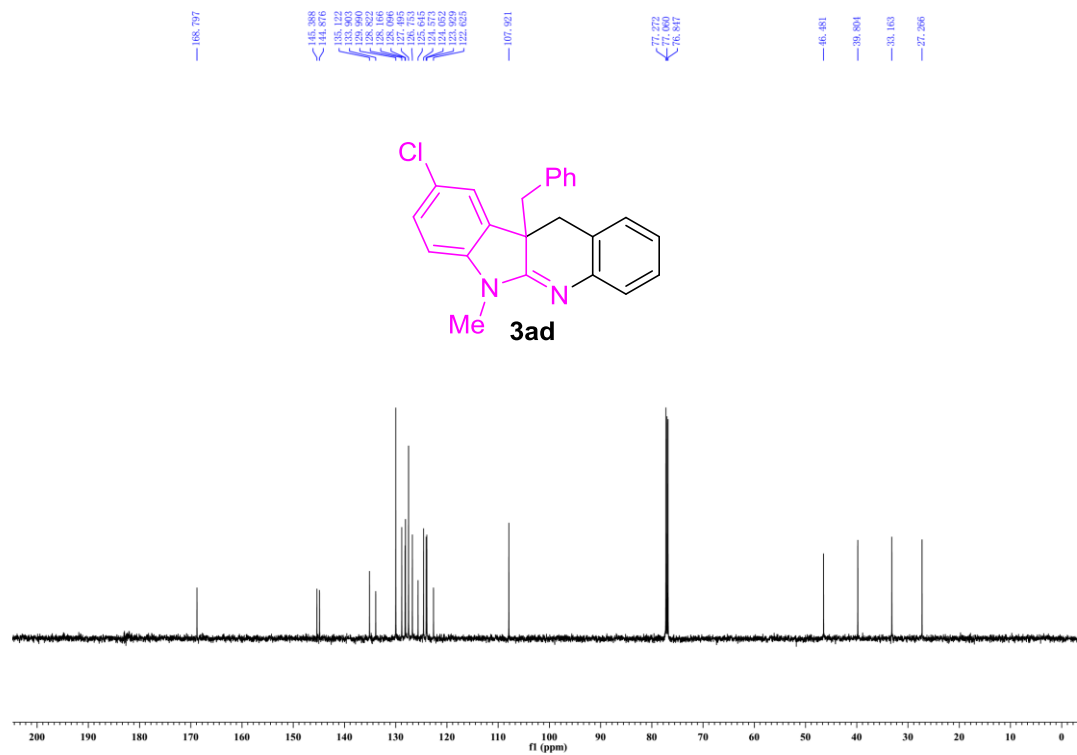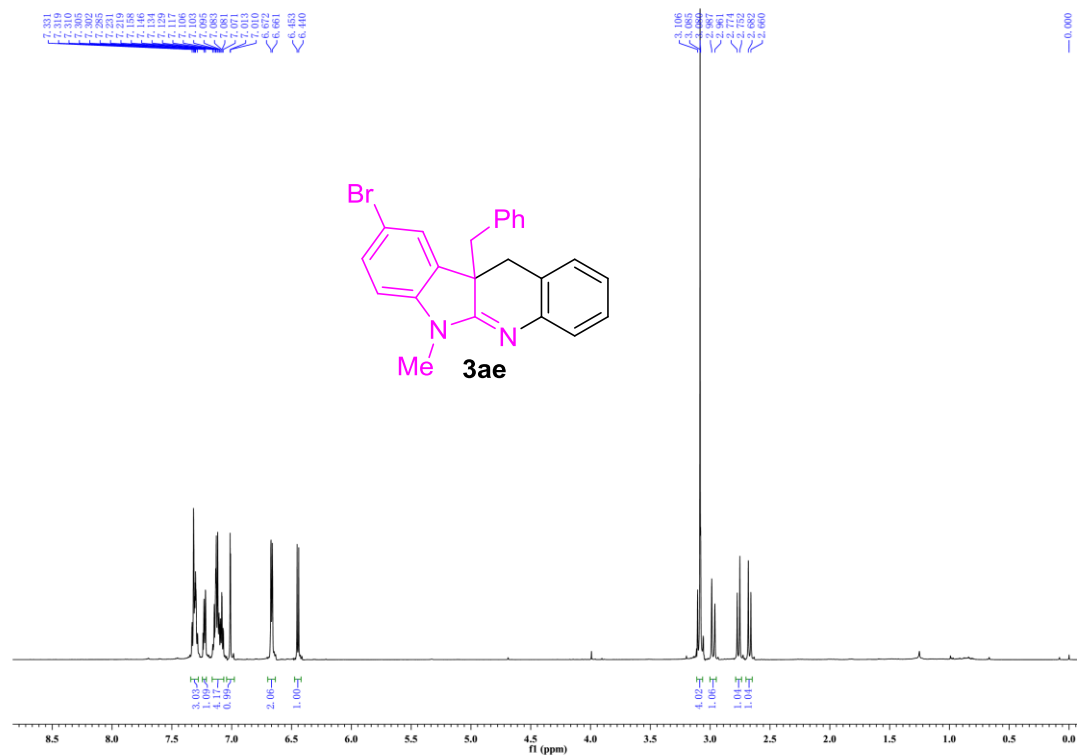

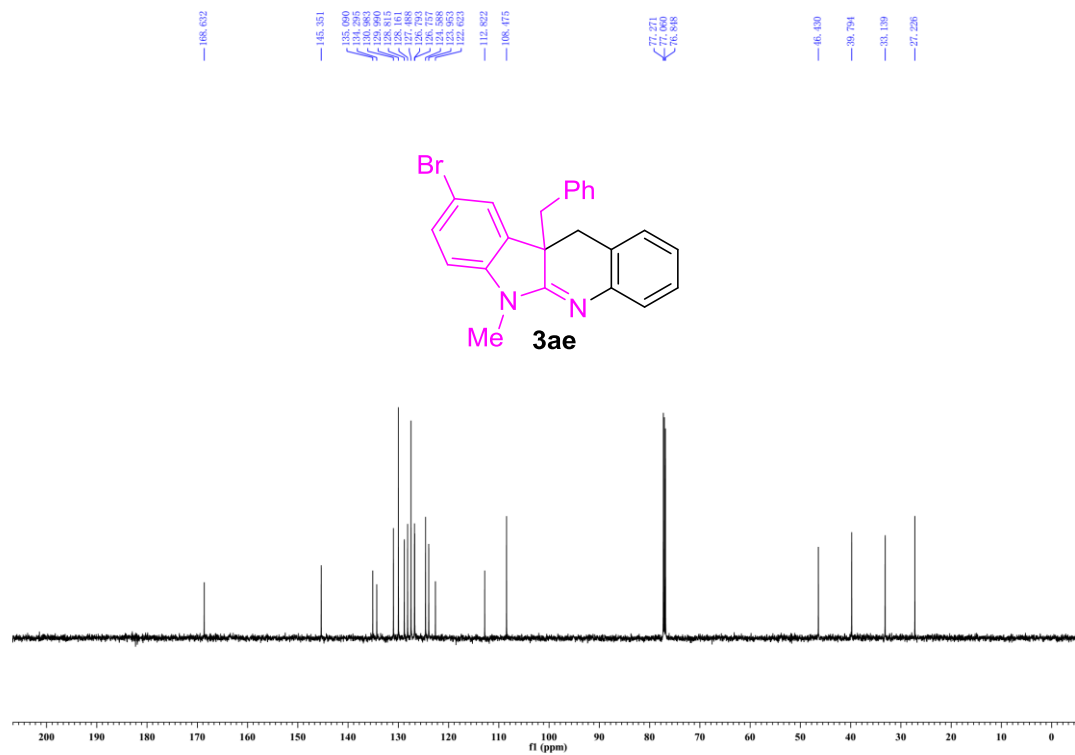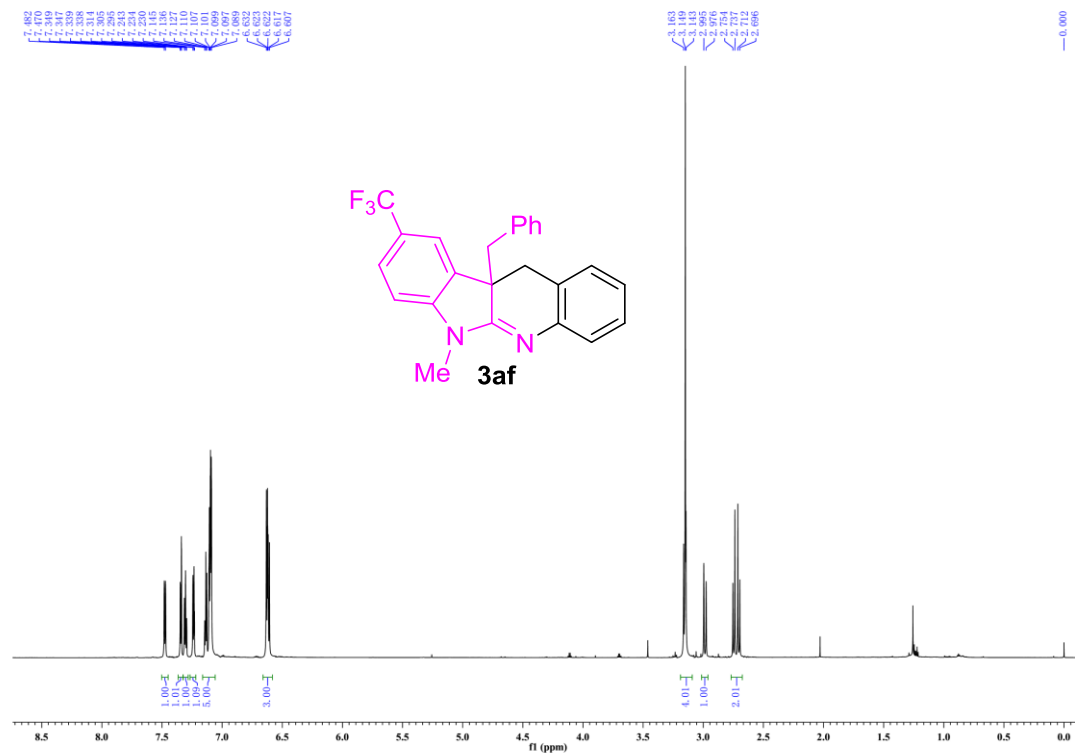

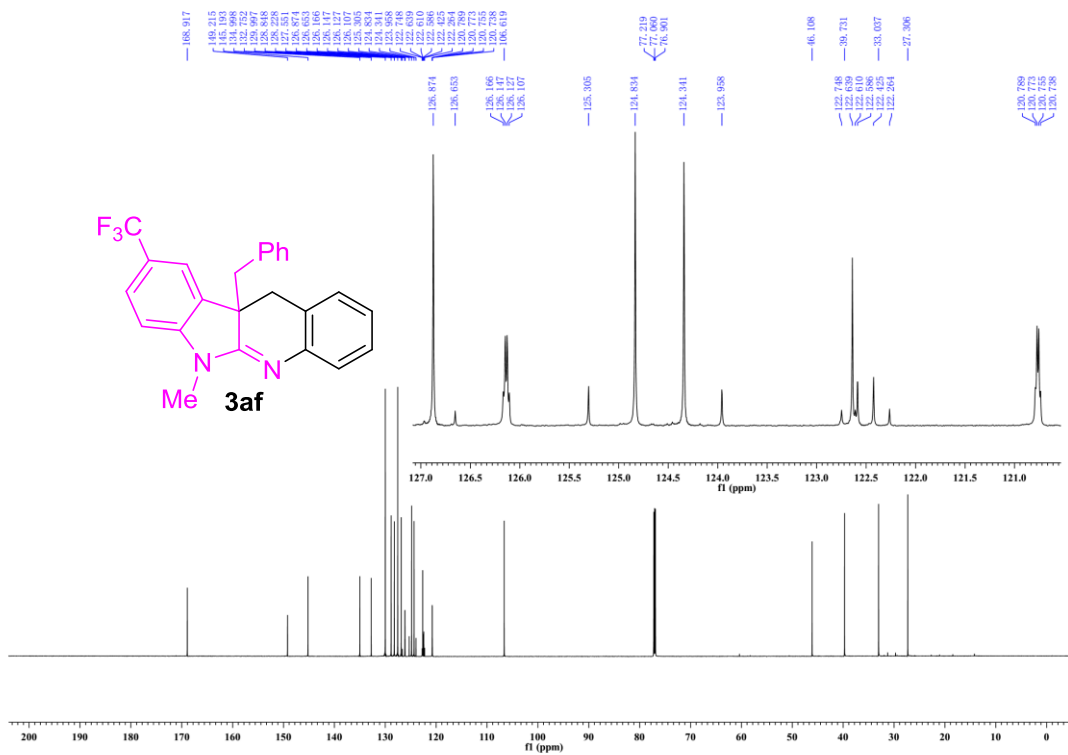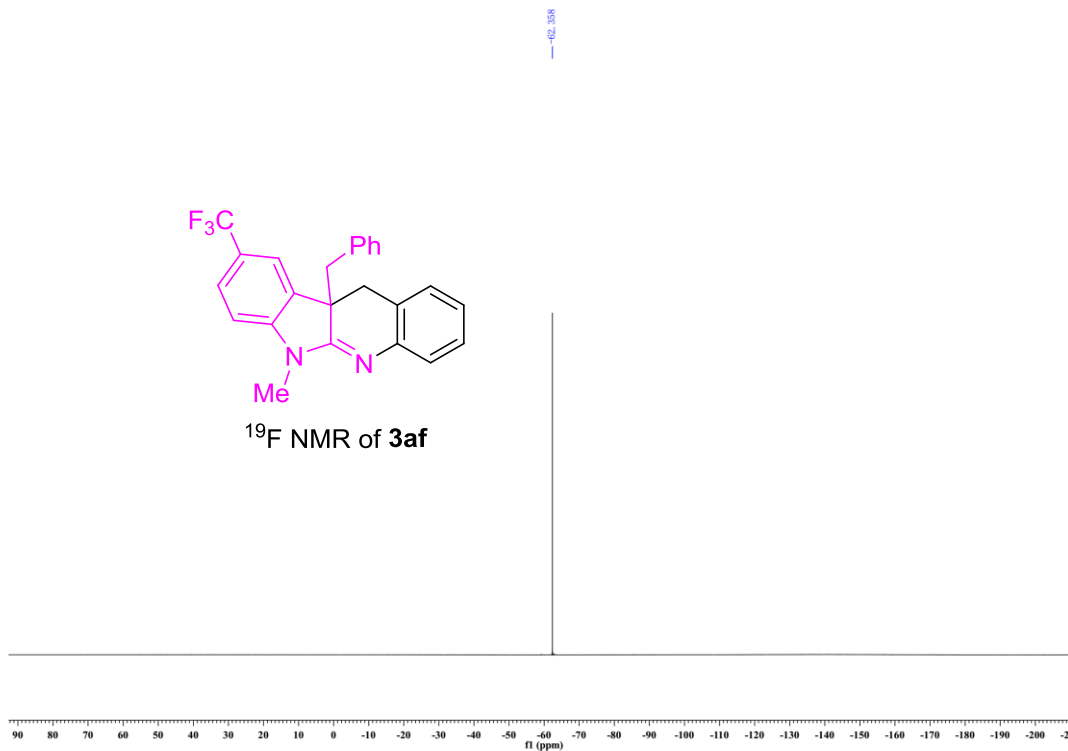



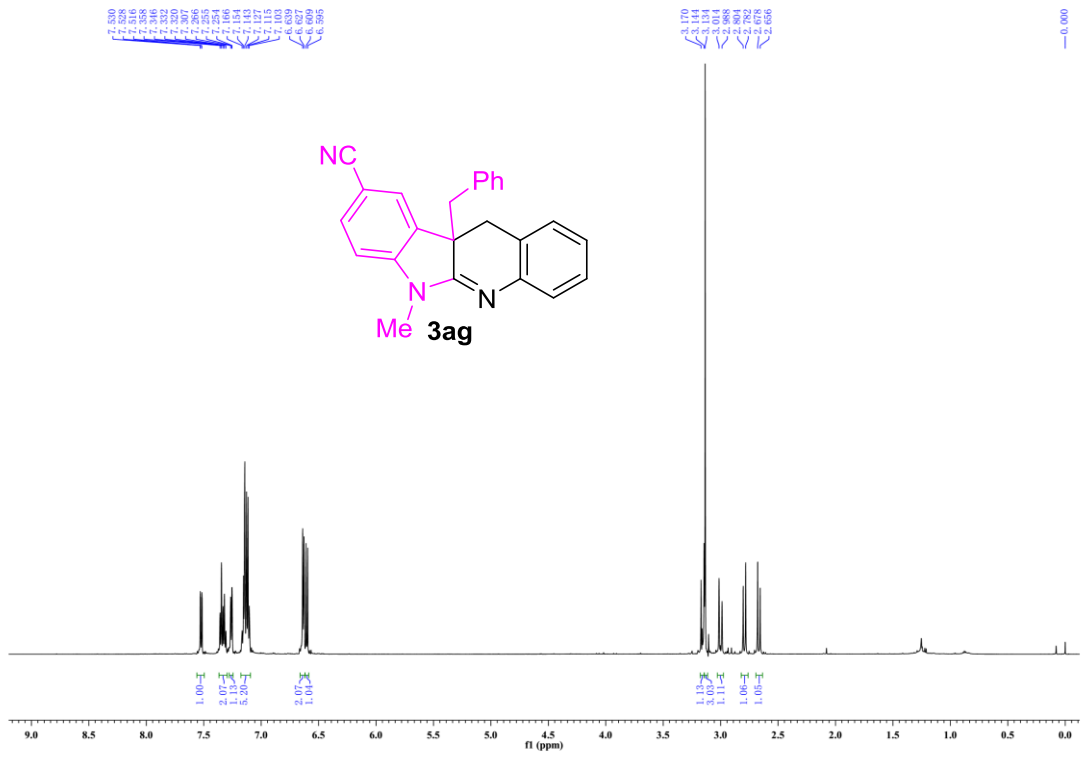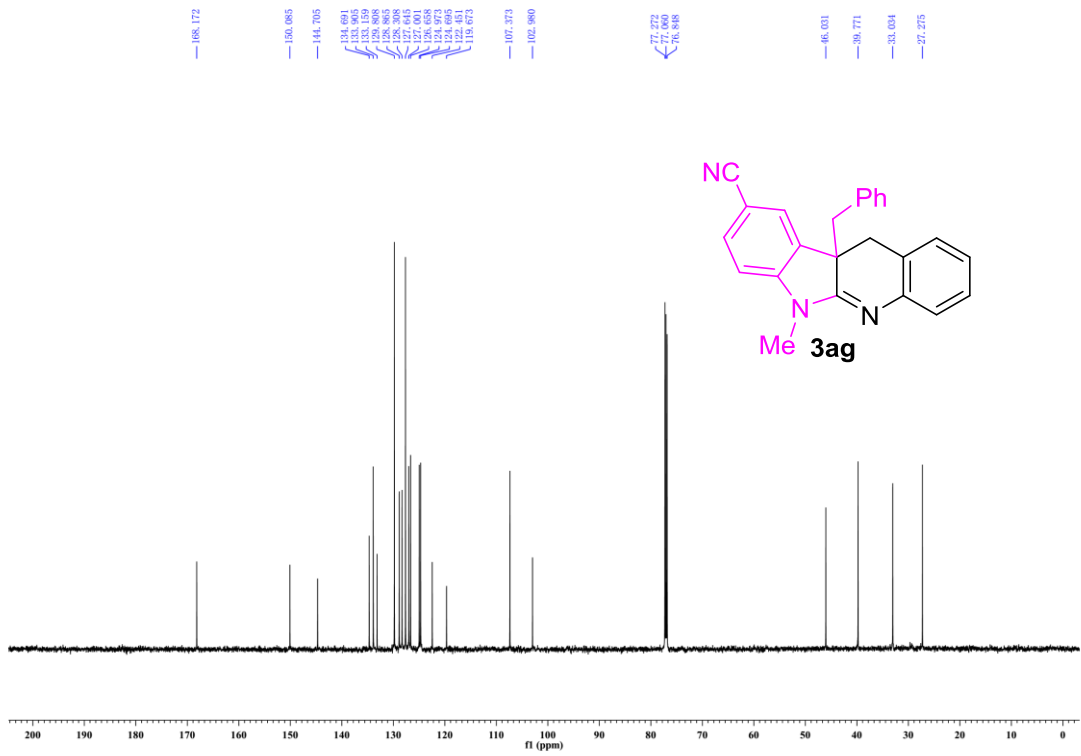

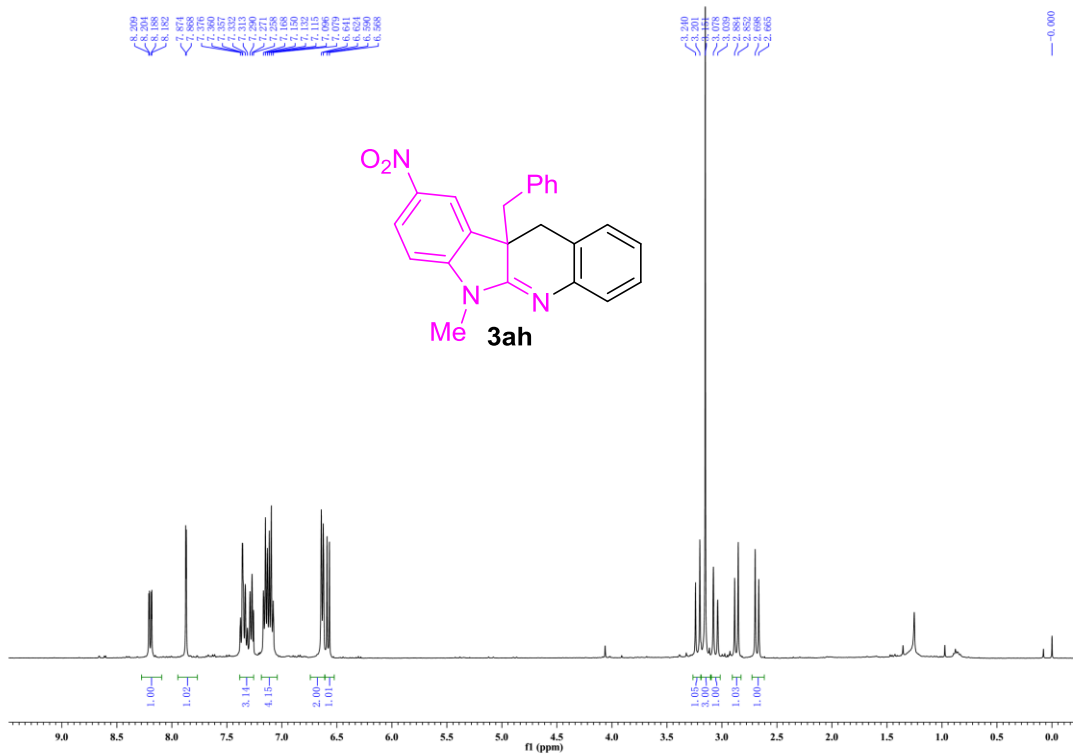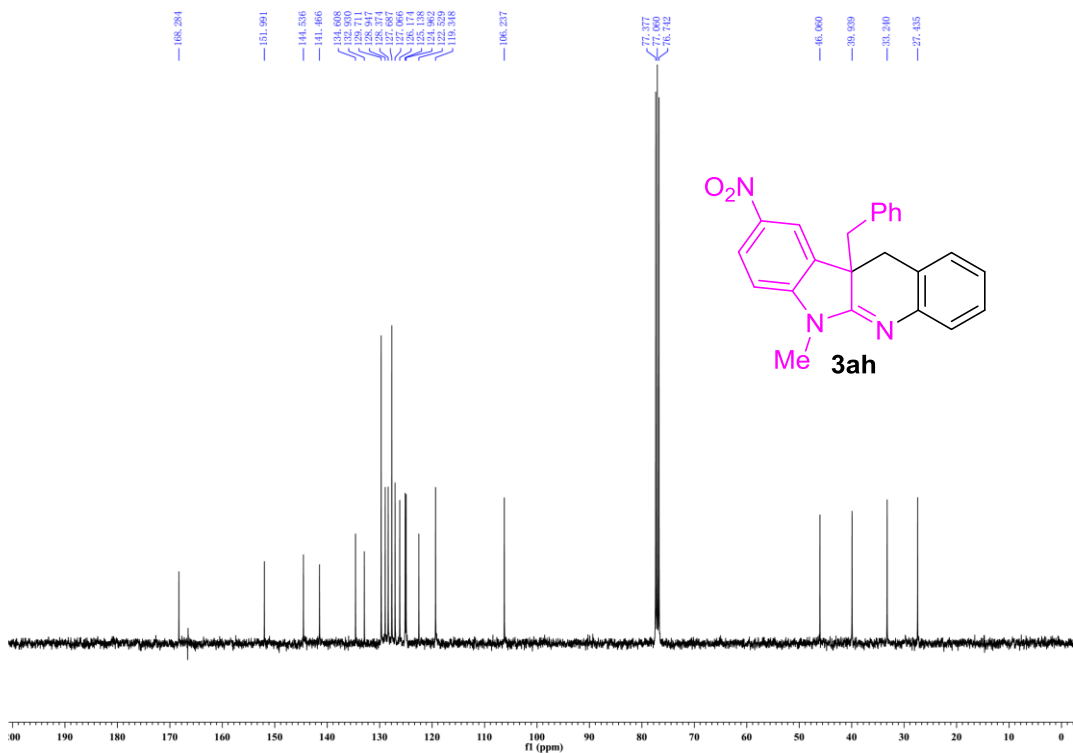

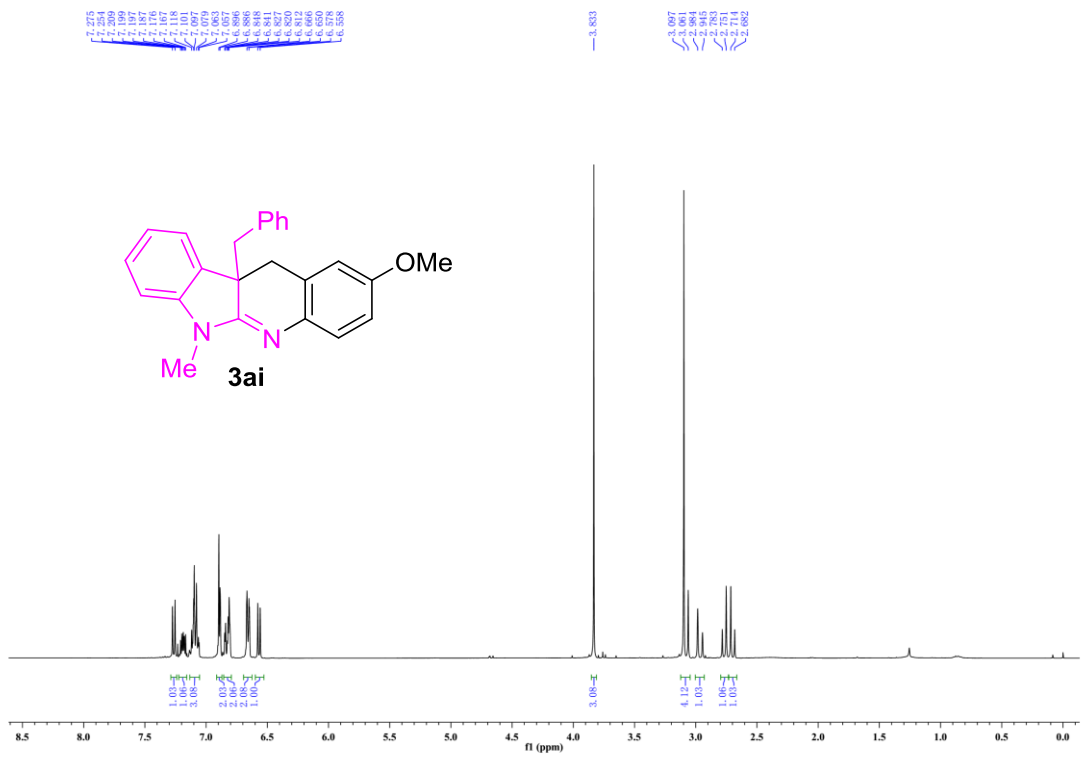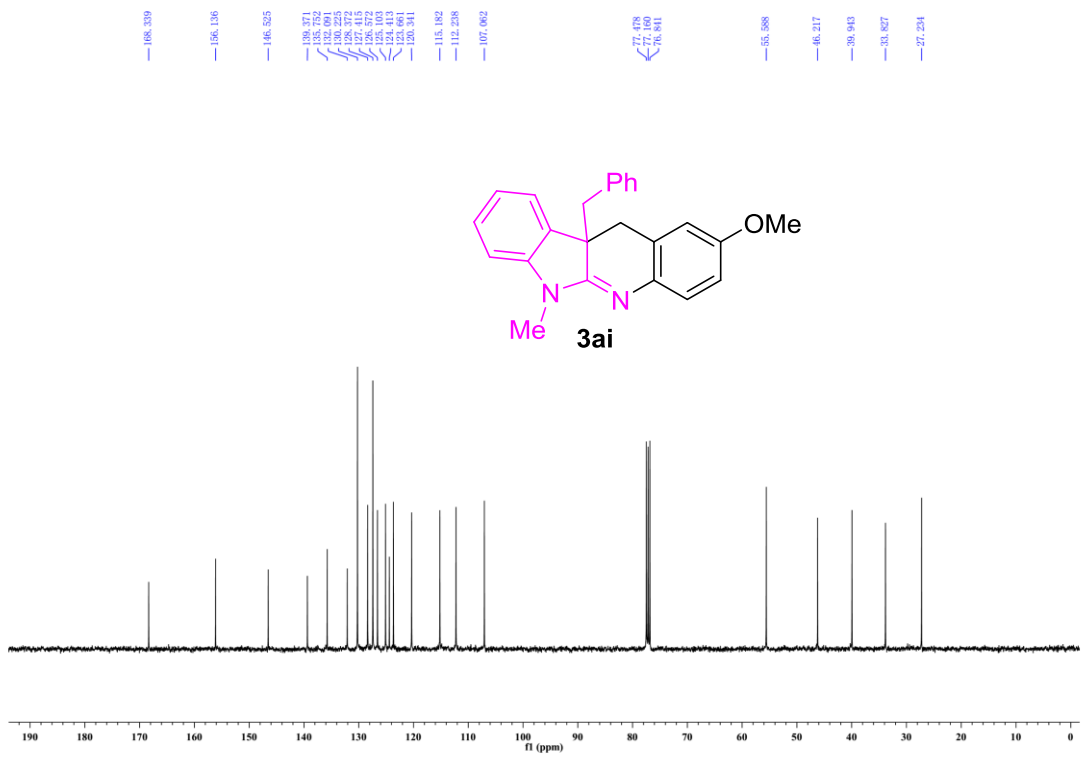

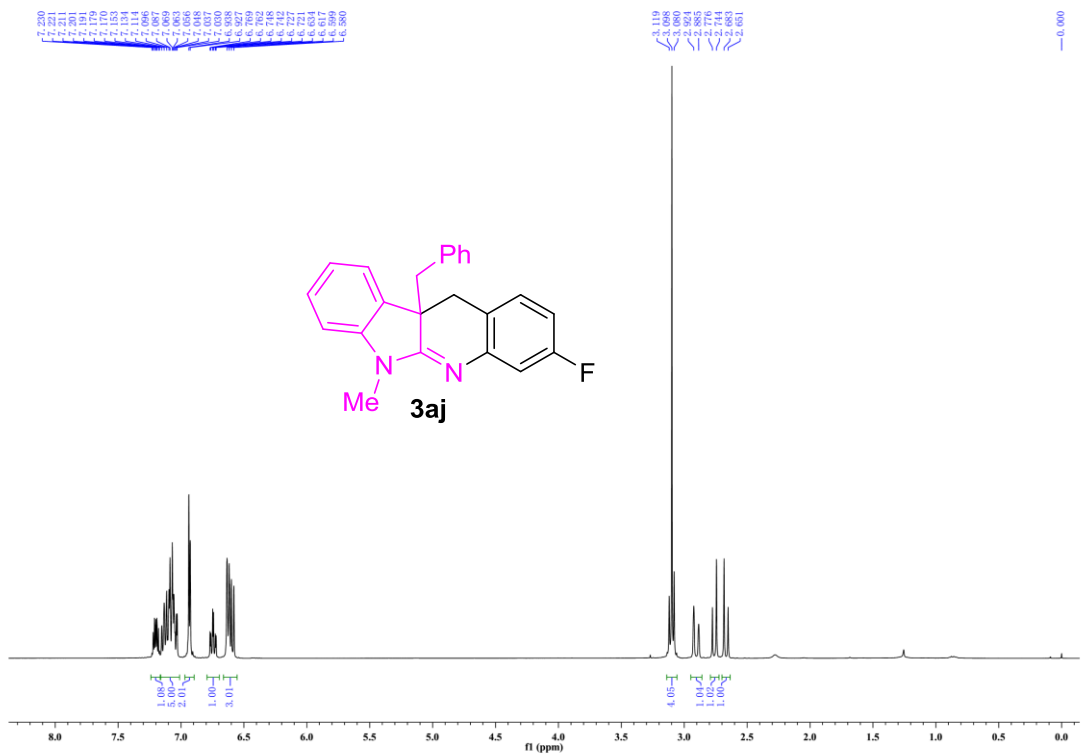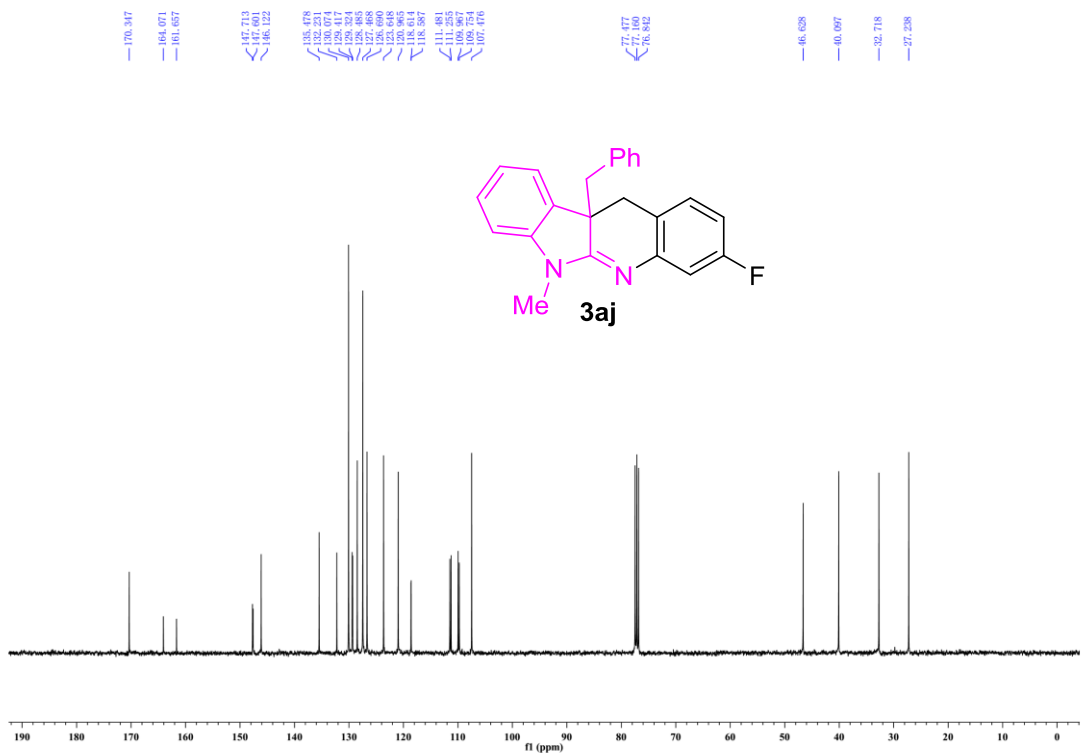

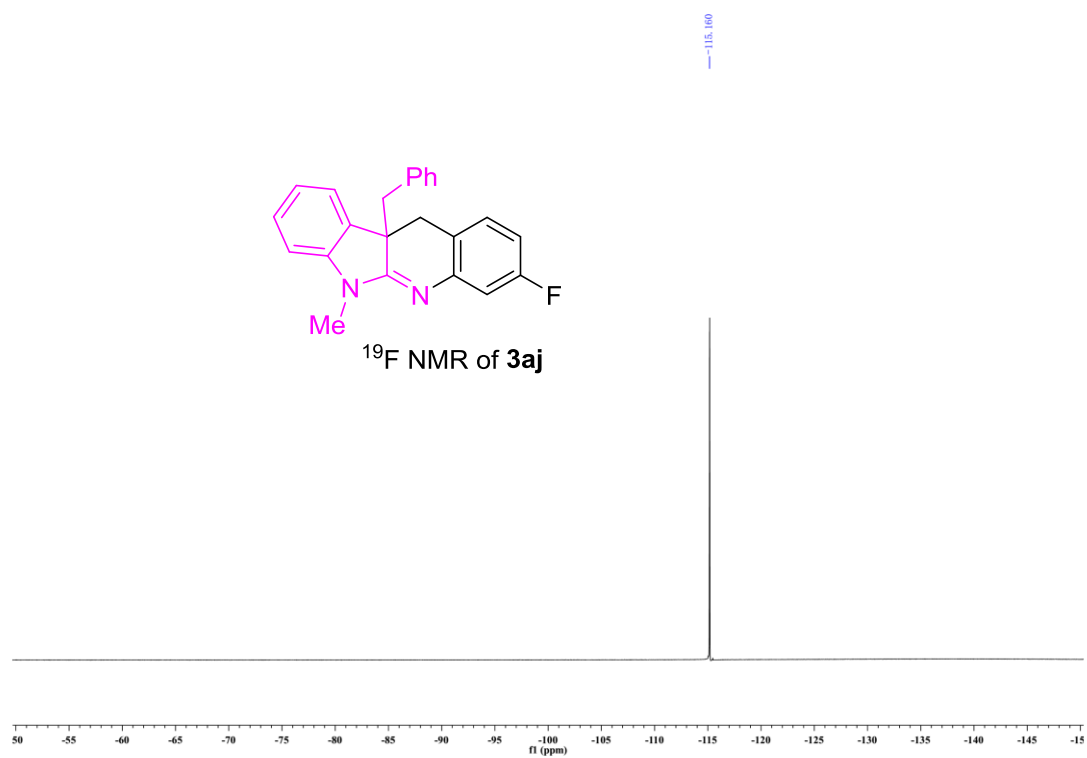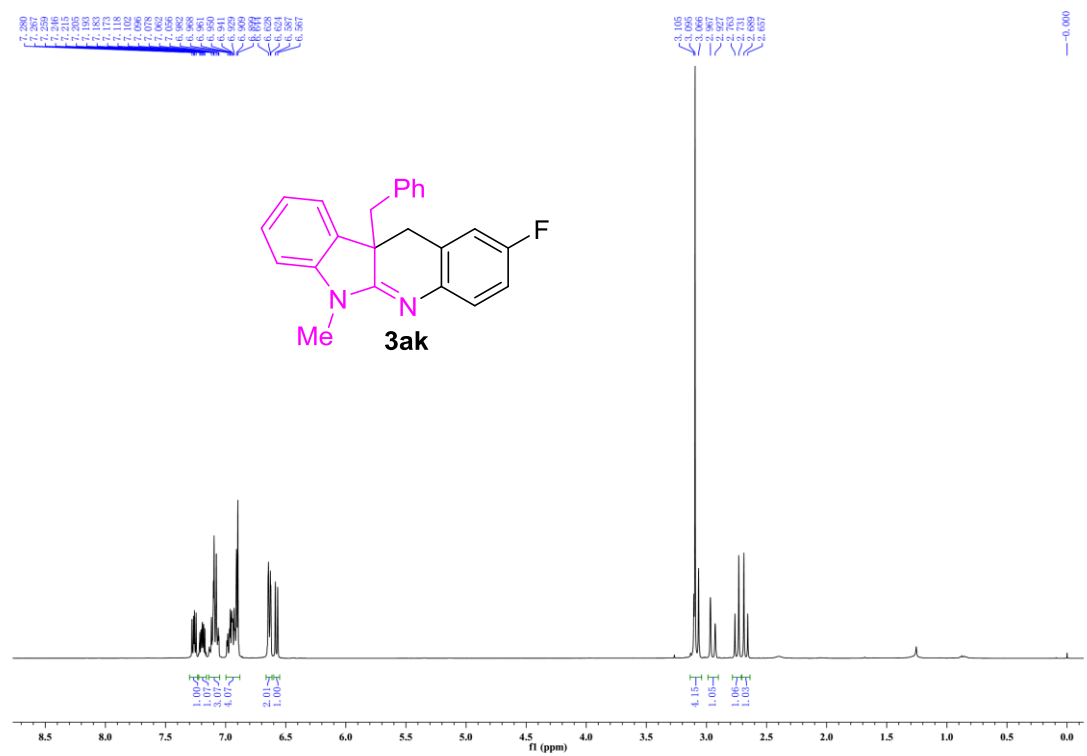

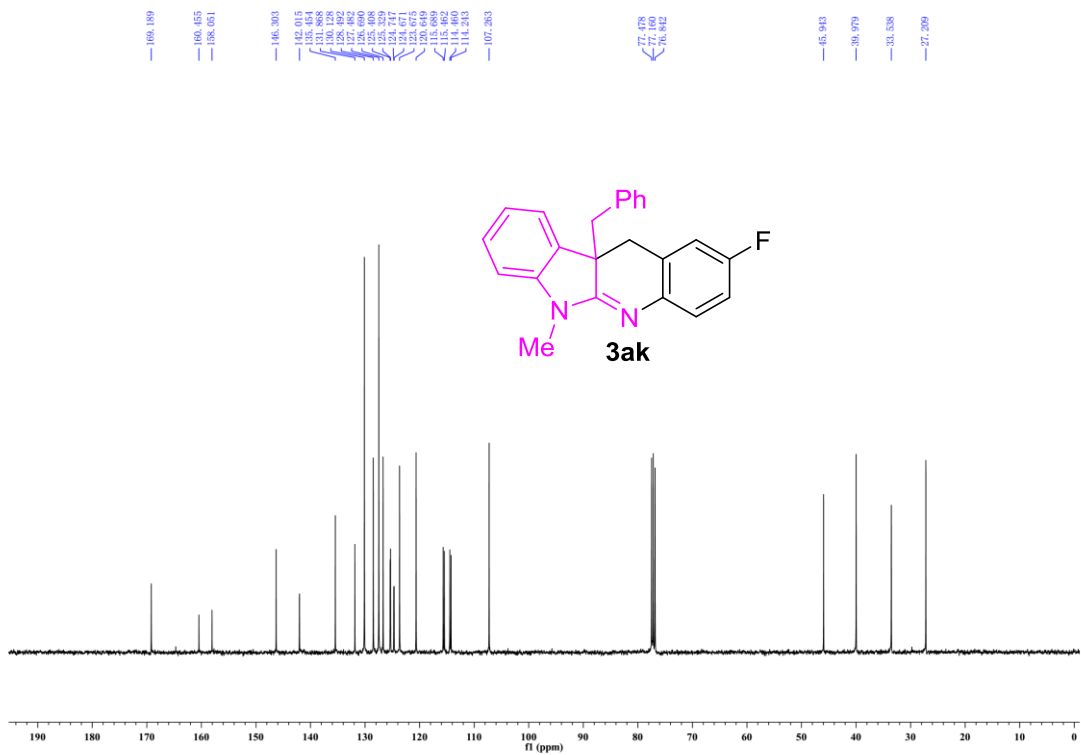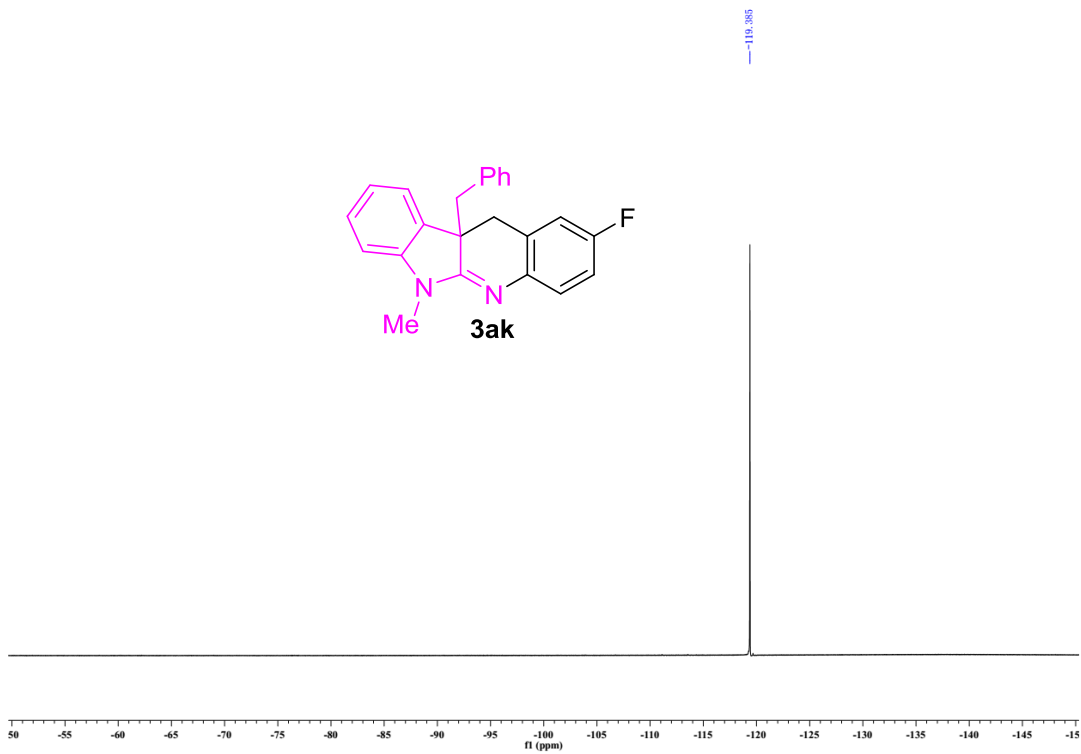

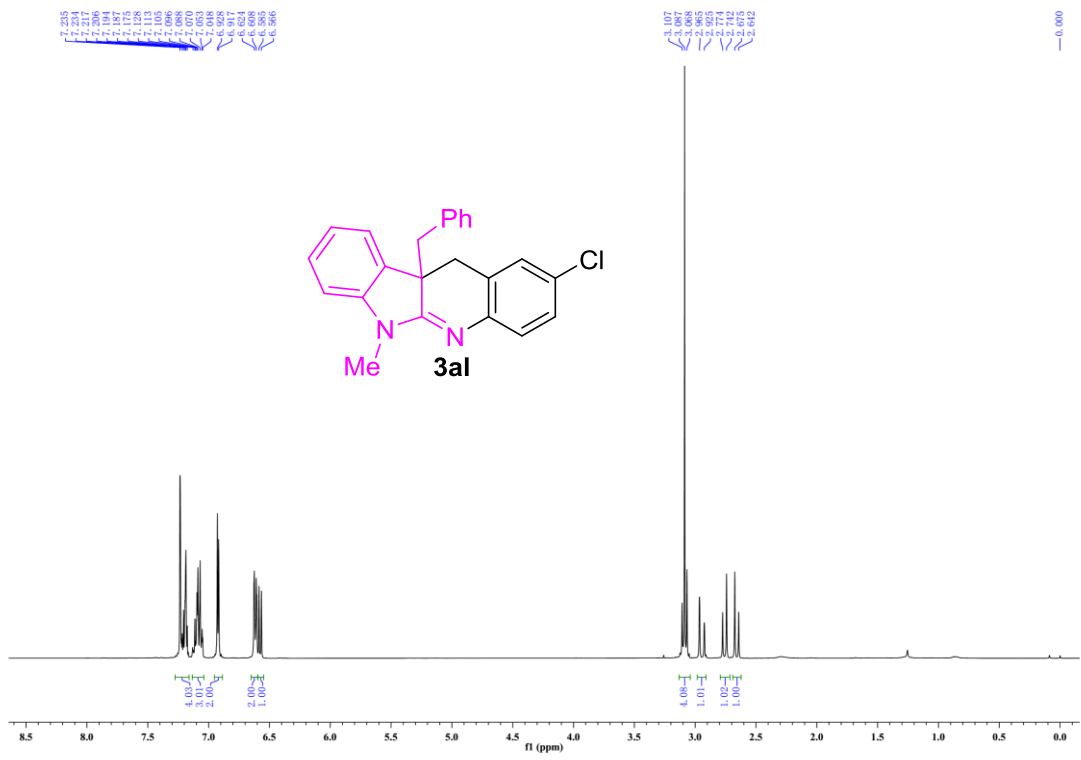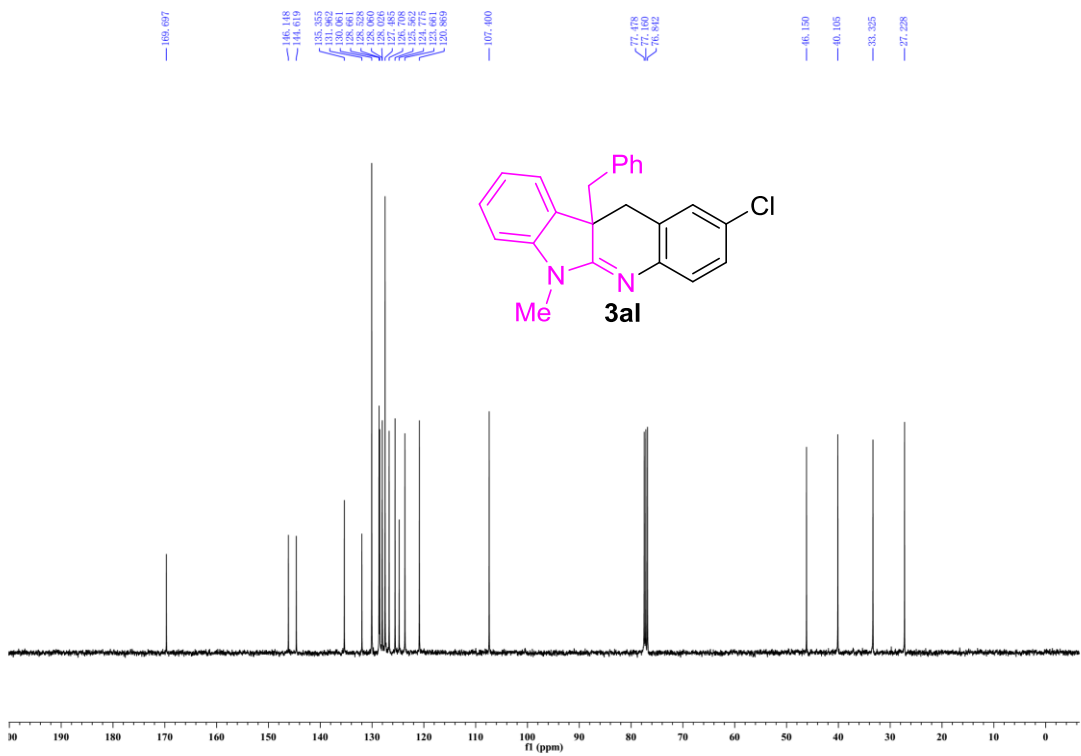

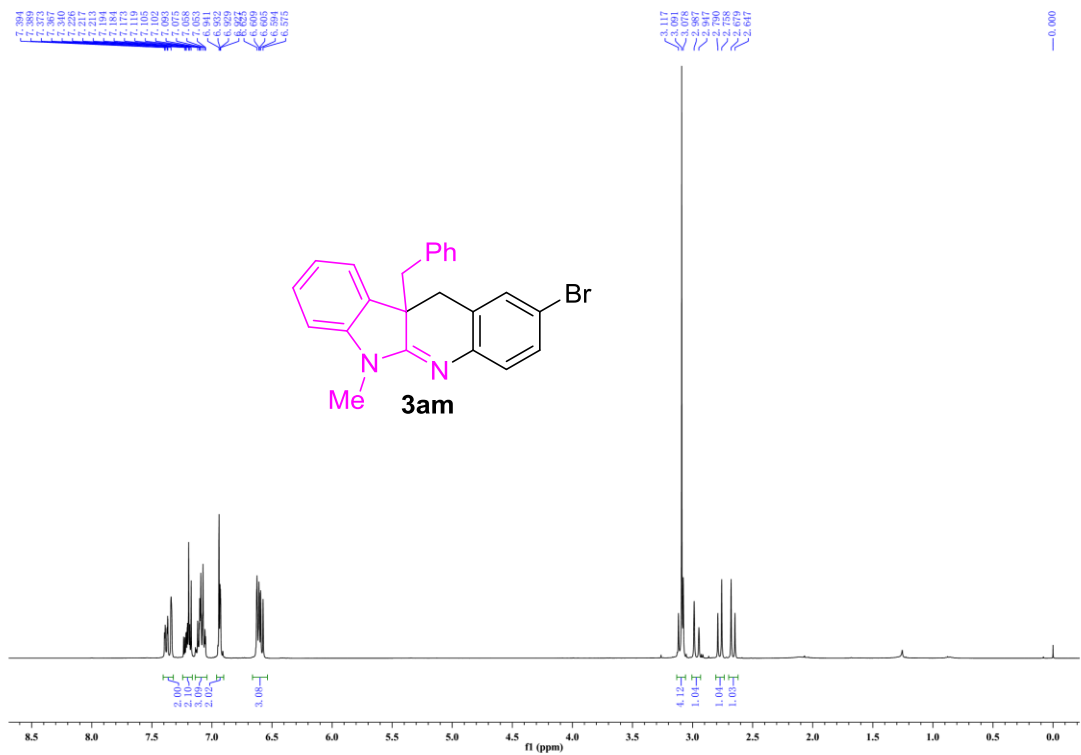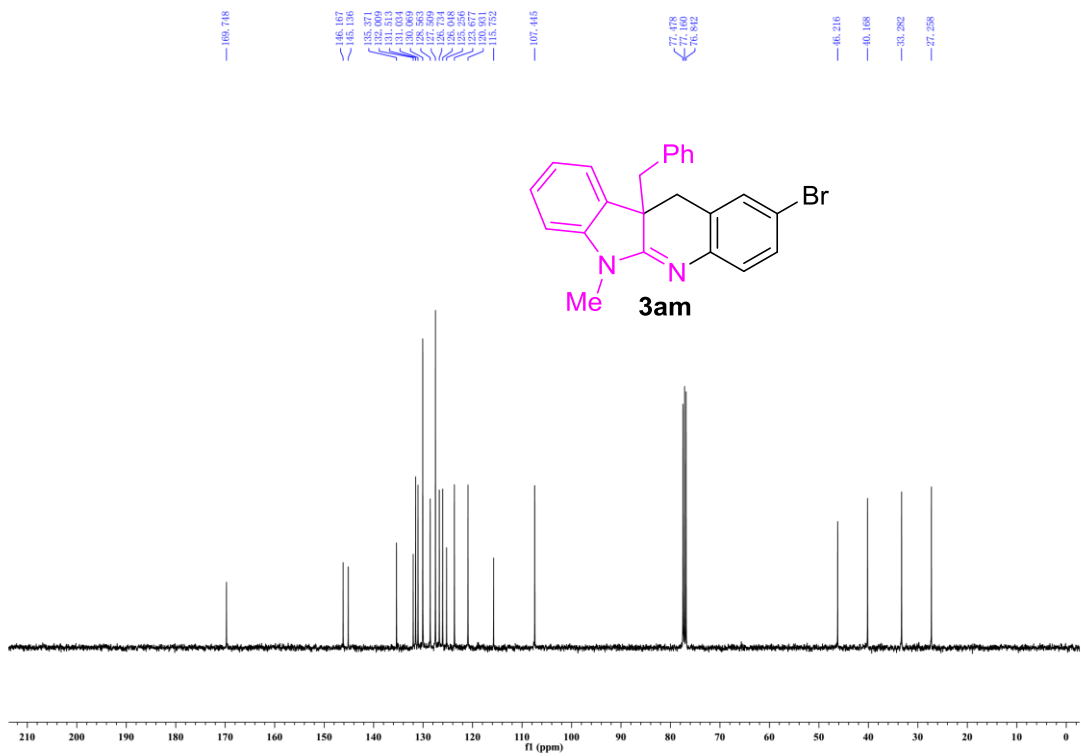



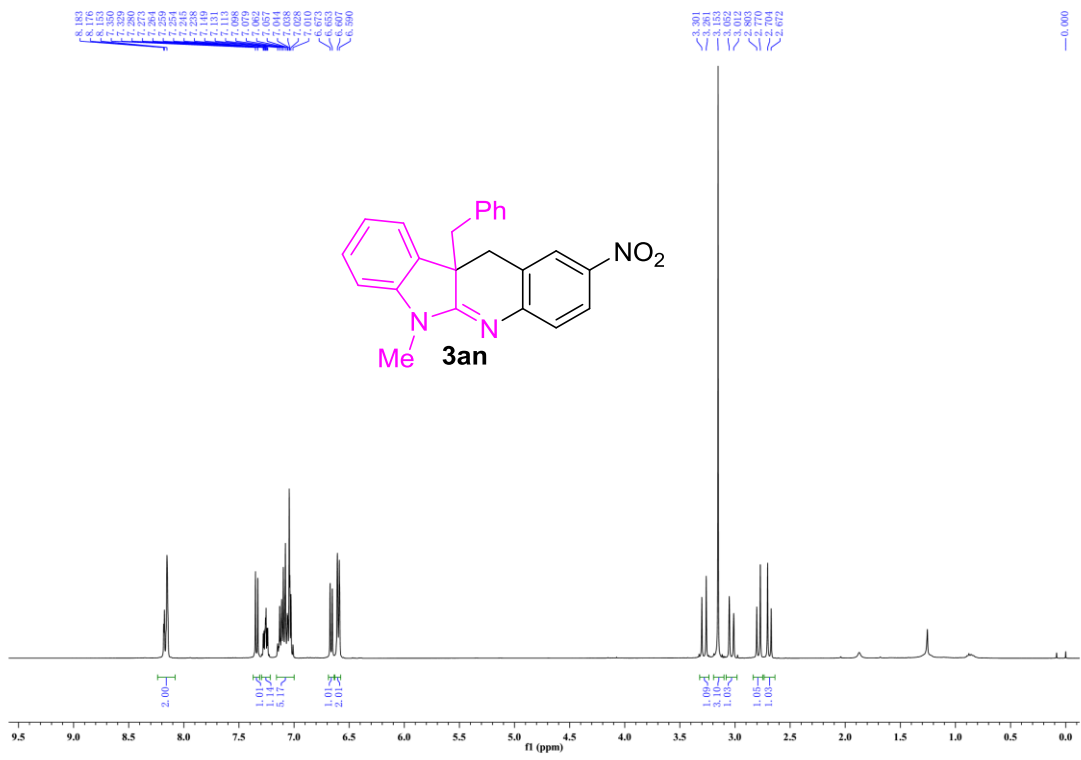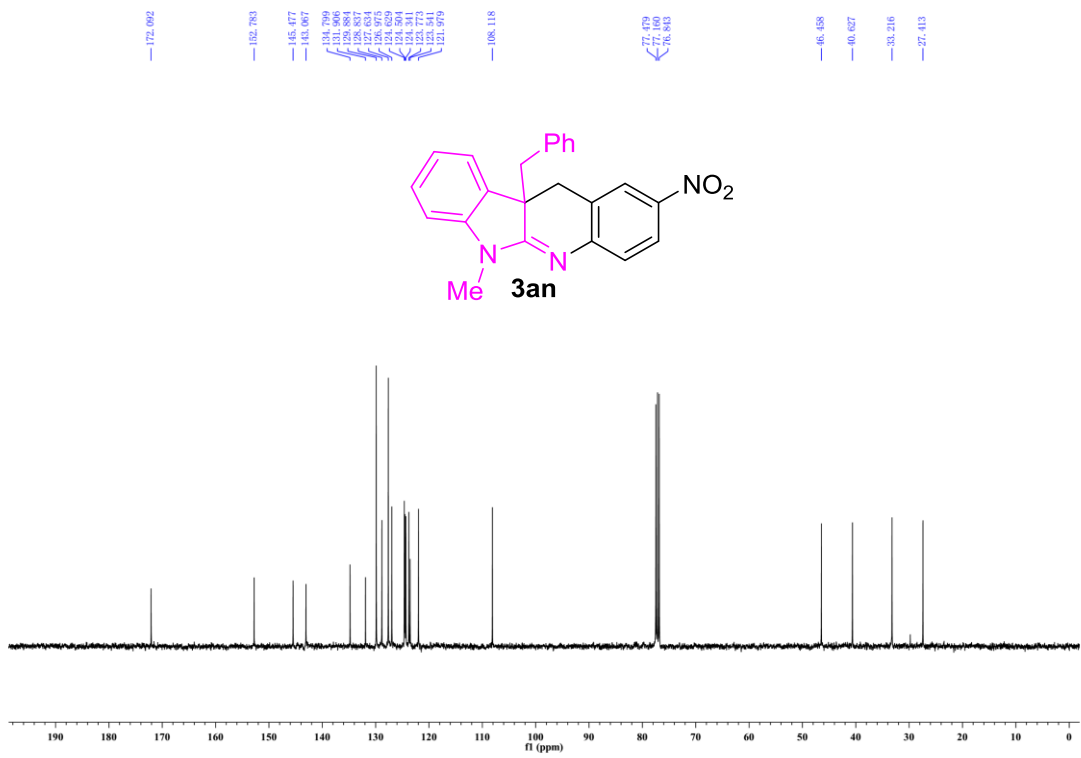



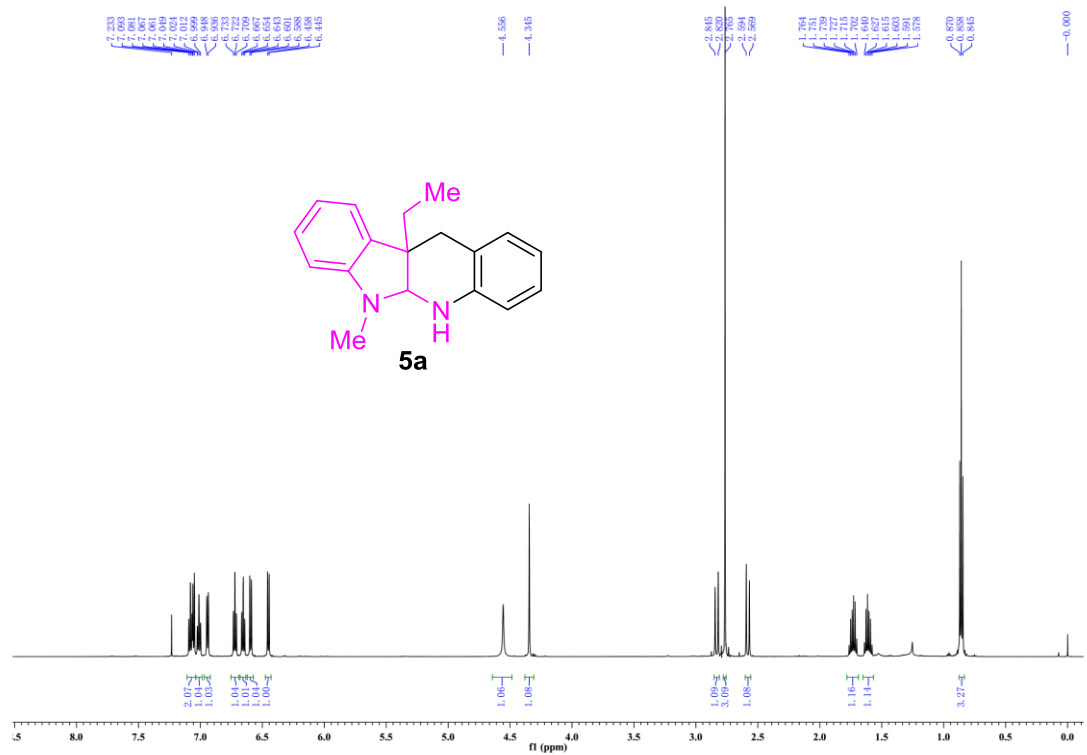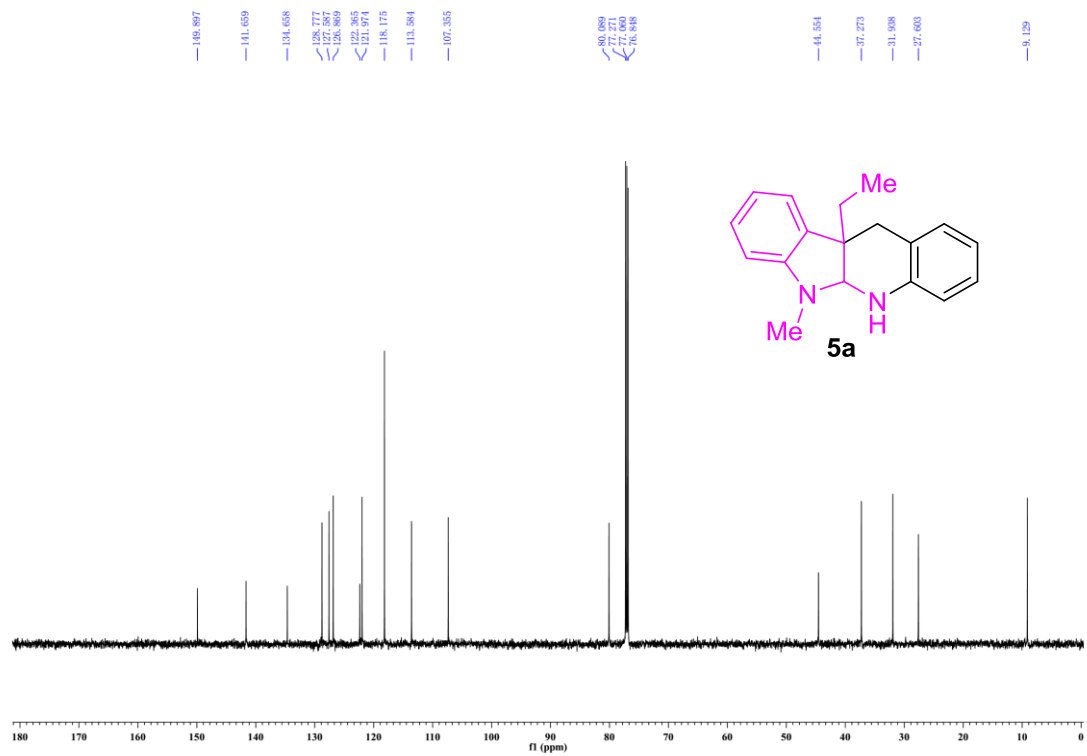

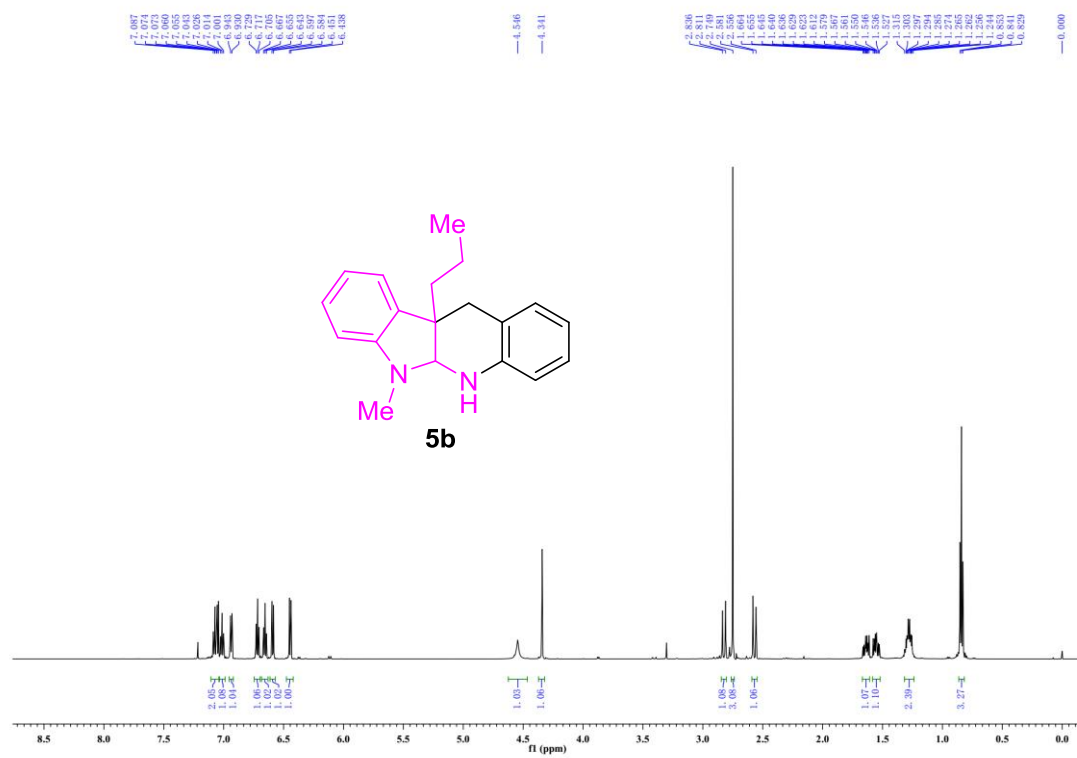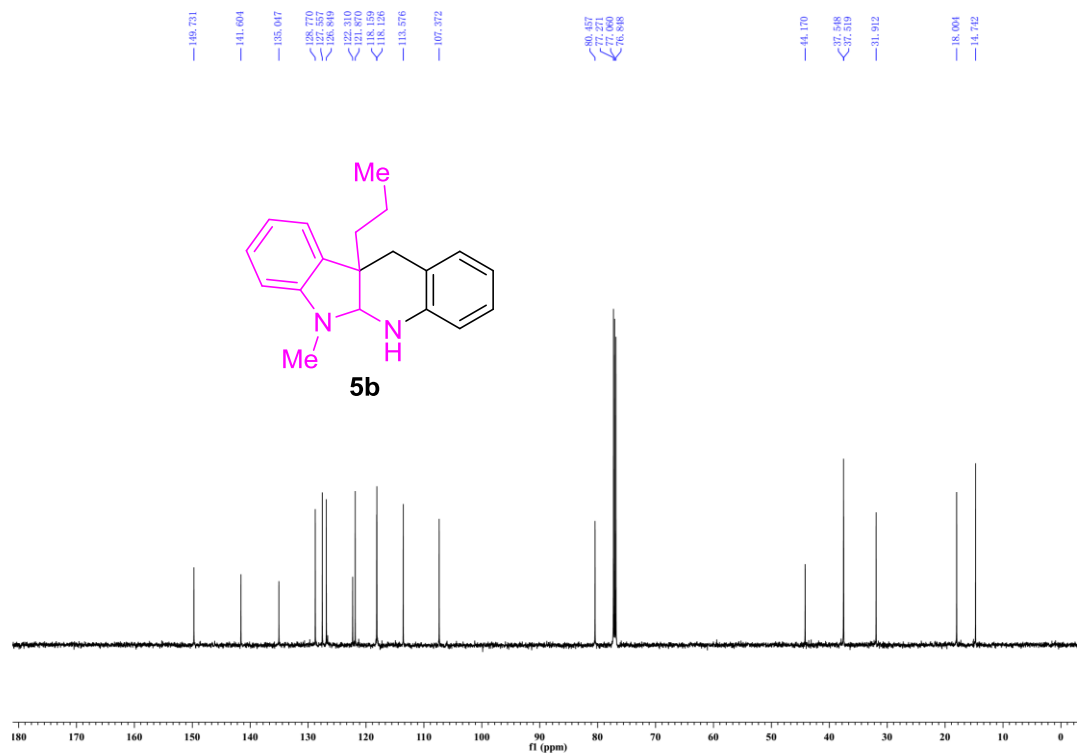

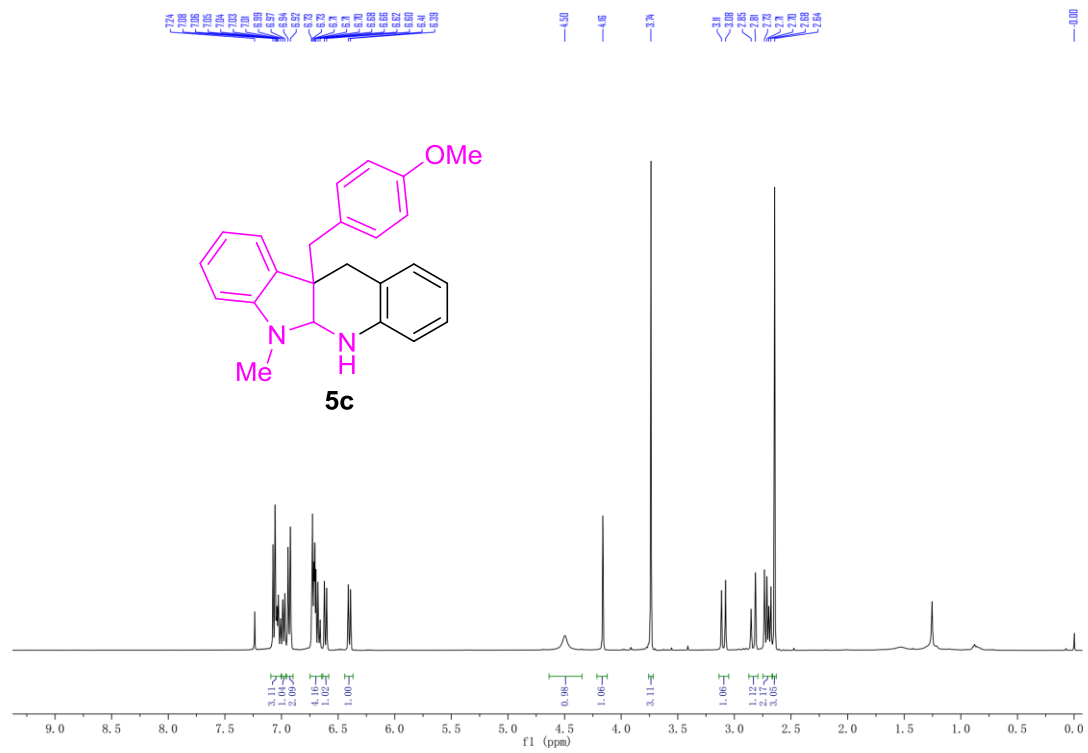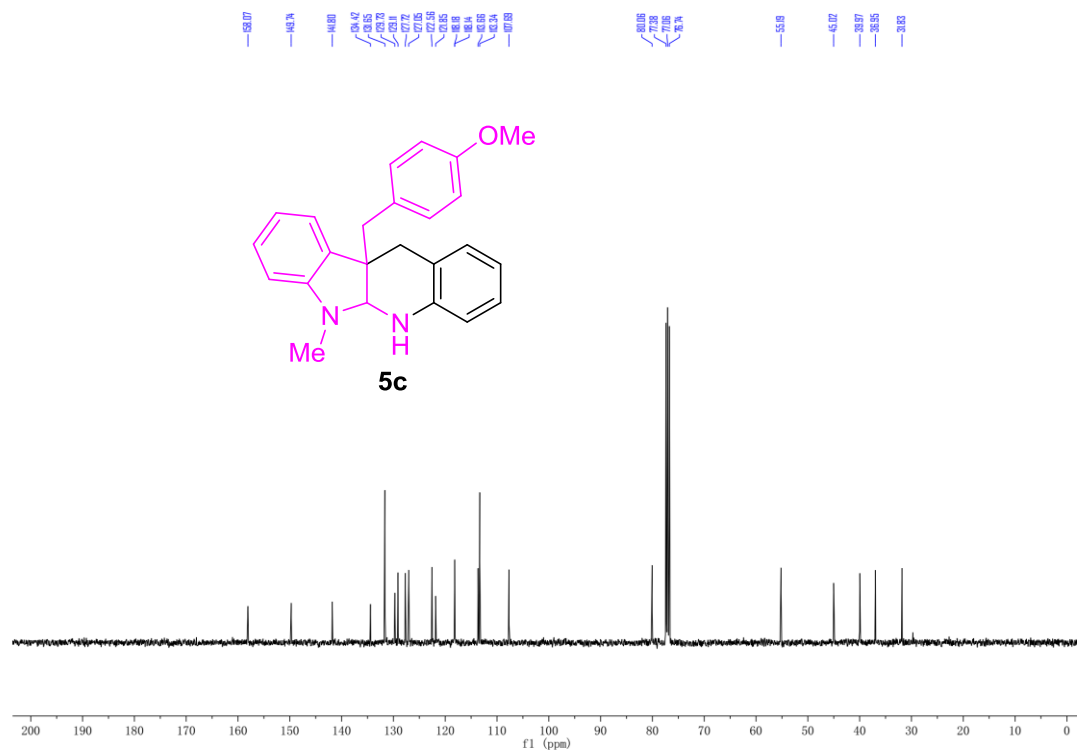

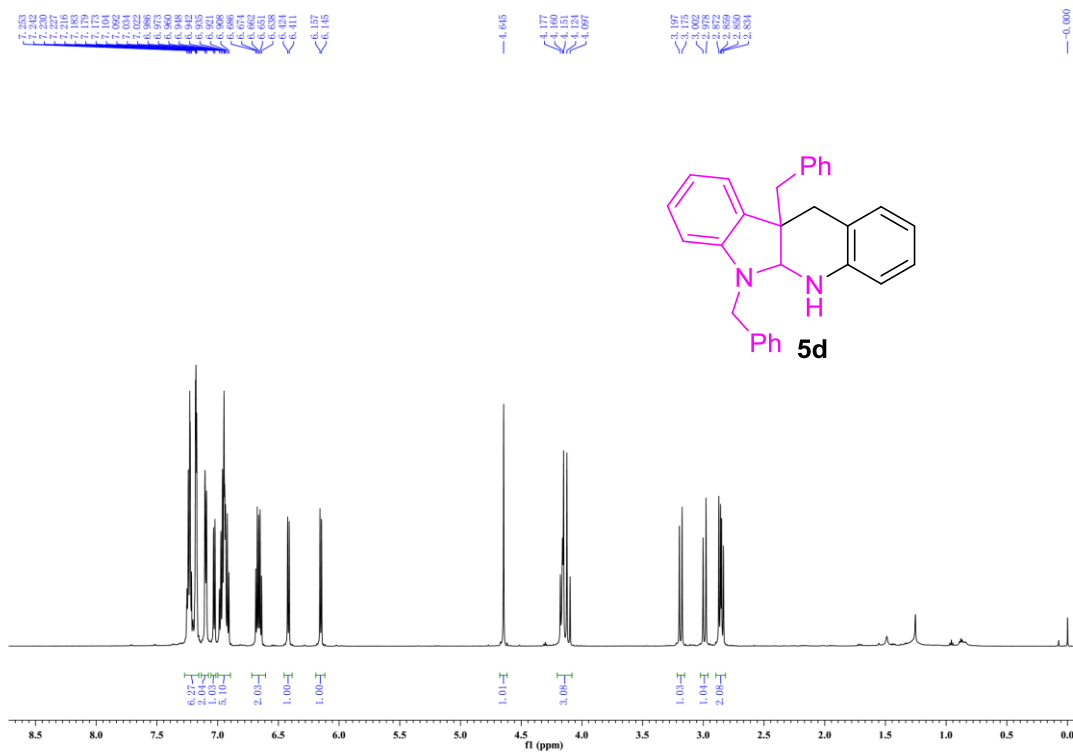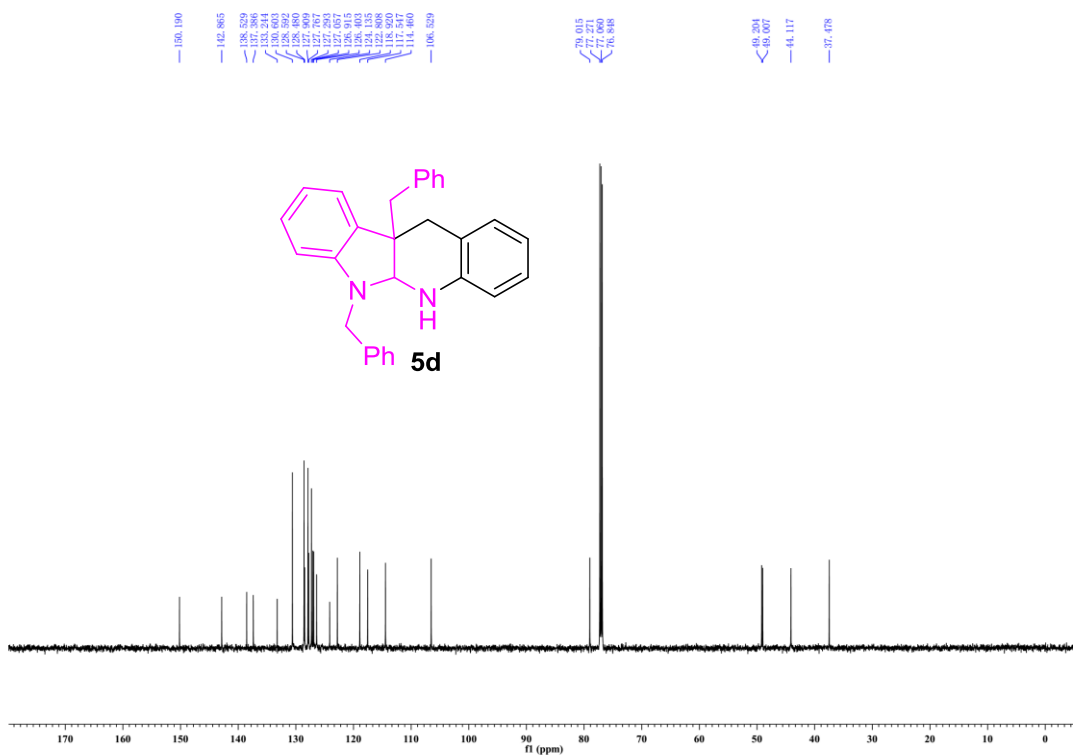

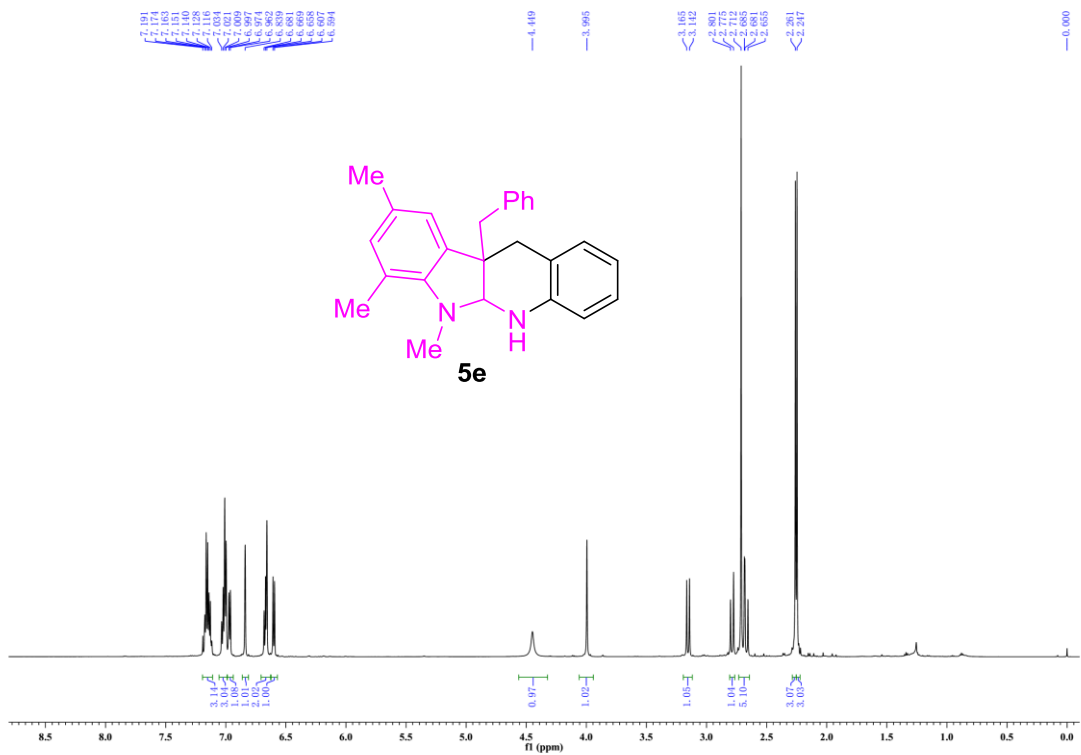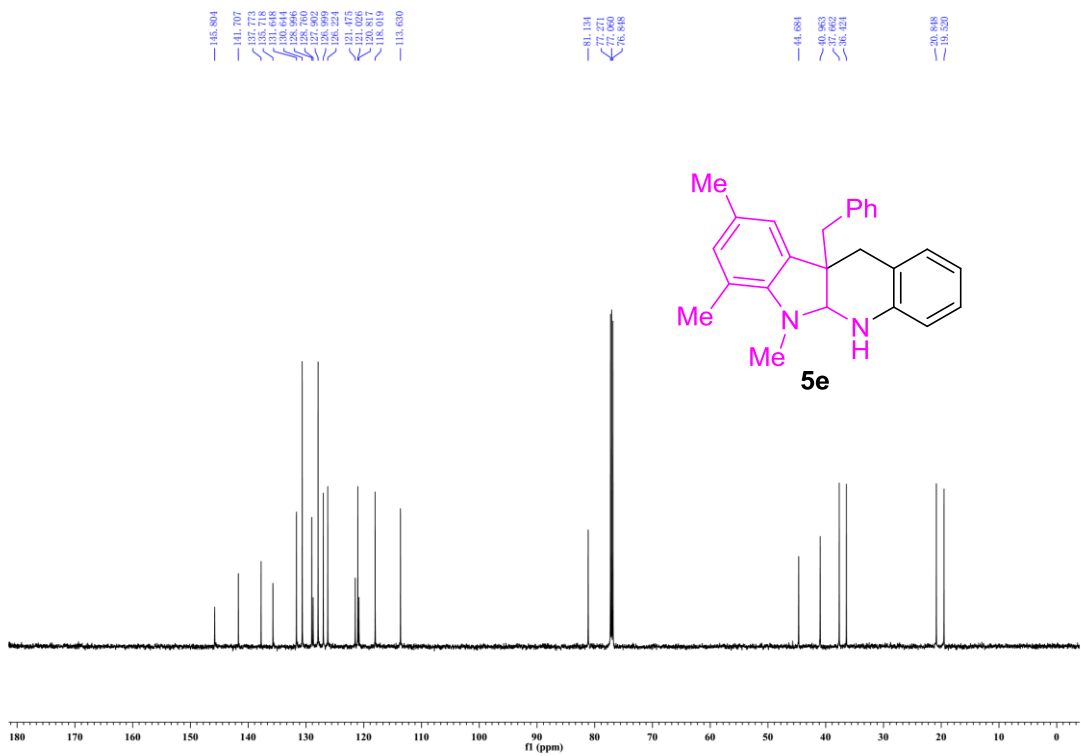

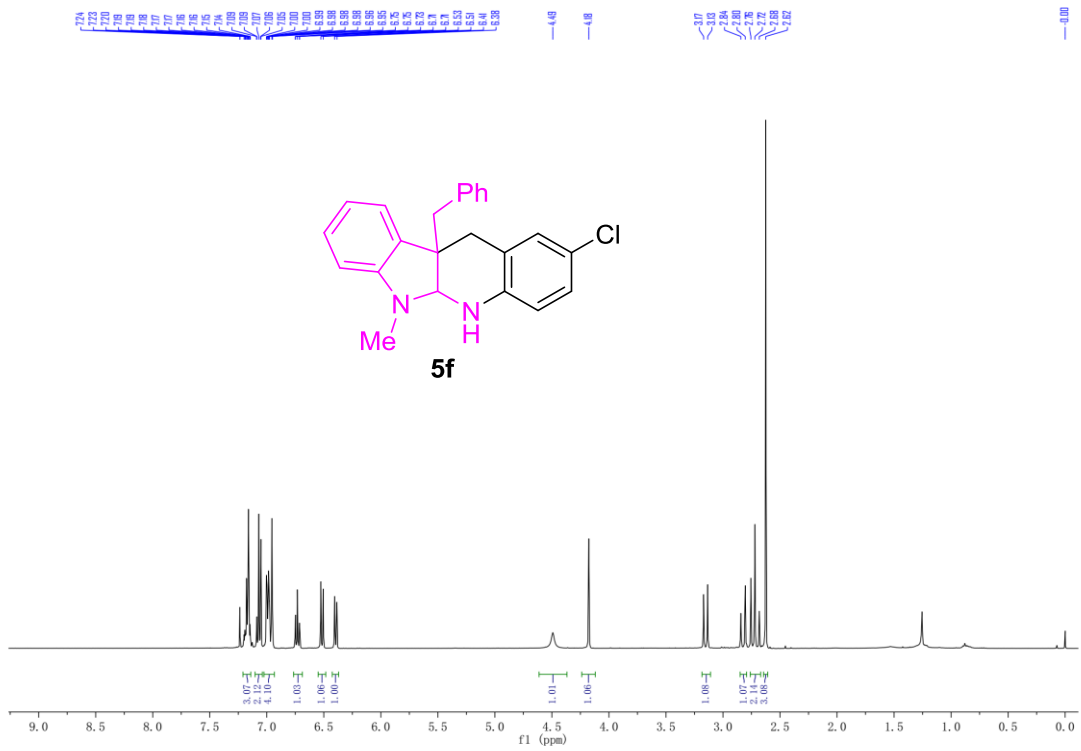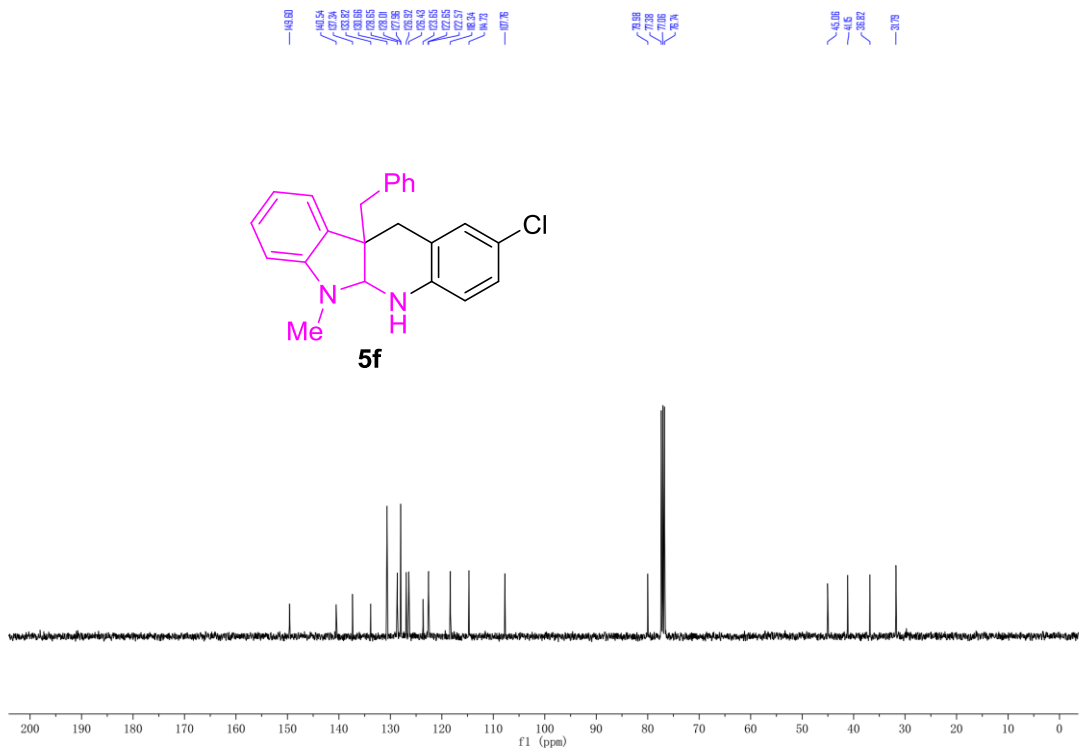

Supplement: c9ra00995g1.pdf [file c9ra00995g1.pdf]
